# Supplementary material for: Regio- and stereoselective thiocyanatothiolation of alkynes and alkenes by using NH4SCN and N-thiosuccinimides
Source: Royal Society of Chemistry journal article supplement (doi:10.1039/d0ra06913b), 2020-01-01
Supplement: d0ra06913b1.pdf [file d0ra06913b1.pdf]

## Supporting information

### **Regio- and Stereoselective Thiocyanatothiolation of Alkynes and Alkenes by Using NH<sub>4</sub>SCN and *N*-thiosuccinimides**

Liang Qi,<sup>a</sup> Shiwen Liu,<sup>b</sup> Linxia Xiao \*<sup>a</sup>

<sup>a</sup> Jiangsu Vocational College of Medicine, Jie Fang South Road 283 th, Yancheng, 224000, China.

<sup>b</sup> College of Textiles and Clothing, Yancheng Institute of Technology, Yancheng, 224051, China.  
Email: xiaolinxiaxlx@126.com

#### Table of contents

|                                                                                |     |
|--------------------------------------------------------------------------------|-----|
| 1. General.....                                                                | 3   |
| 2. General procedure for the preparation of <i>N</i> -thiosuccinimides.....    | 3   |
| 3. General procedure for regioselective thiocyanatothiolation of alkynes ..... | 3   |
| 4. Characterization data for the products 3 .....                              | 4   |
| 5. General procedure for regioselective thiocyanatothiolation of alkenes.....  | 17  |
| 6. Characterization data for the products 5 .....                              | 17  |
| 7. X-ray Crystallographic Analysis of product 3aq .....                        | 20  |
| 8. Copies of NMR Spectra .....                                                 | 22  |
| 9. References.....                                                             | 147 |

## 1. General

Commercial reagents and solvents were obtained from the commercial providers and used without further purification. The products were purified using a commercial flash chromatography system or a regular glass column. TLC was developed on silica gel 60 F254 glass plates.  $^1\text{H}$  NMR (400 MHz) and  $^{13}\text{C}$  NMR (100 MHz) spectra were recorded on a Bruker NMR apparatus. The chemical shifts are reported in  $\delta$  (ppm) values ( $^1\text{H}$  and  $^{13}\text{C}$  NMR relative to  $\text{CHCl}_3$ ,  $\delta$  7.26 ppm for  $^1\text{H}$  NMR and  $\delta$  77.0 ppm for  $^{13}\text{C}$  NMR). Or alternatively,  $^1\text{H}$  NMR chemical shifts were referenced to tetramethylsilane signal (0 ppm). Multiplicities are recorded by s (singlet), d (doublet), t (triplet), m (multiplet) and br (broad). Coupling constants ( $J$ ), are reported in Hertz (Hz). GC analyses were performed using a Shimadzu GC-2010-ultra gas chromatography–mass spectrometry instrument equipped with a Shimadzu AOC-20s autosampler.

## 2. General procedure for the preparation of *N*-thiosuccinimides

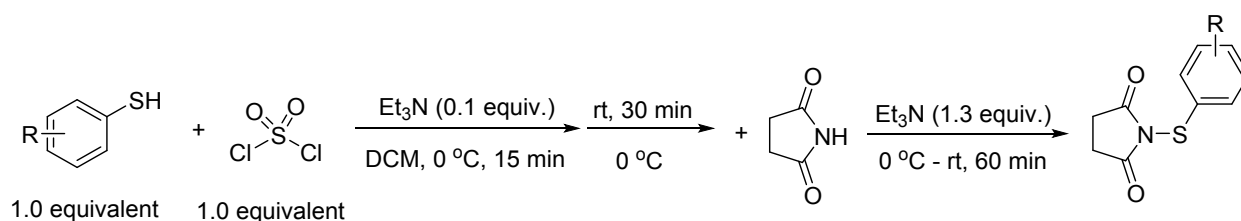

Sulfuryl chloride (1.0 equivalent) was added dropwise to a solution of thiol (1.0 equivalent) and triethylamine (0.1 equivalents) in dichloromethane (1M) at 0 °C. After stirring for 15 minutes, the mixture was warmed to room temperature and stirred for 30 minutes and then cooled to 0 °C. The resulting solution was transferred dropwise via cannula to a solution of succinimide (1.0 equivalent) in dichloromethane (1M) and triethylamine (1.3 equivalents) at 0 °C, and the mixture was then warmed to room temperature over 1 hour. The solution was diluted with water and extracted with an equal volume of dichloromethane before being dried over sodium sulfate. Evaporation of the solvent gave crude product that was purified by using flash column chromatography.<sup>[1]</sup>

## 3. General procedure for regioselective thiocyanatothioloation of alkynes

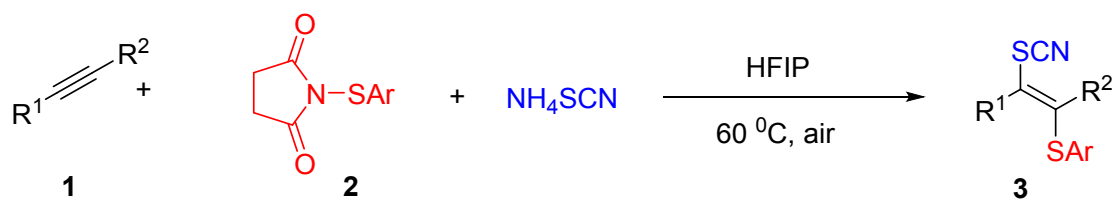

An oven-dried glass vial was charged with *N*-thiosuccinimides (0.12 mmol),  $\text{NH}_4\text{SCN}$  (0.20 mmol)

and alkynes (0.10 mmol). Then, HFIP (0.5 mL) was added and the mixture was heated to 60°C and stirred for 12 h under air. After that, water was added to quench the reaction, and the resulting aqueous mixture was extracted with ethyl acetate (3 x 5 mL). The combined organic layers were dried over Na<sub>2</sub>SO<sub>4</sub> and concentrated. The crude product was further purified by silica gel column chromatography.

#### 4. Characterization data for the products 3

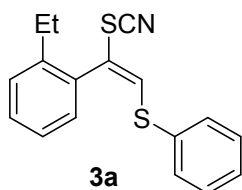

**(E)-2-(2-ethylphenyl)-2-thiocyanatovinyl(phenyl)sulfane (3a).** Yellow oil (24 mg, 82%). <sup>1</sup>H NMR (600 MHz, CDCl<sub>3</sub>) δ 7.44 – 7.37 (m, 6H), 7.35–7.30 (m, 3H), 7.15 (s, 1H), 2.77 (q, *J* = 7.6 Hz, 2H), 1.34 (t, *J* = 7.6 Hz, 3H). <sup>13</sup>C NMR (151 MHz, CDCl<sub>3</sub>) δ 142.65, 135.98, 133.62, 133.36, 130.47, 130.24, 129.90, 129.51, 129.06, 128.08, 126.59, 118.38, 109.91, 25.84, 15.08. HRMS (EI) Calculated for C<sub>17</sub>H<sub>15</sub>NS<sub>2</sub> (M<sup>+</sup>) 297.0646, found 297.0641.

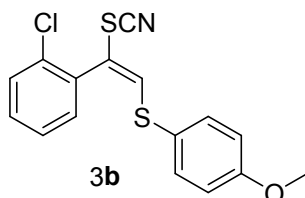

**(E)-2-(2-chlorophenyl)-2-thiocyanatovinyl(4-methoxyphenyl)sulfane (3b).** Yellow oil (24 mg, 73%). <sup>1</sup>H NMR (600 MHz, CDCl<sub>3</sub>) δ 7.50 – 7.49 (m, 2H), 7.41 – 7.36 (m, 3H), 7.21 (s, 1H), 6.92 (d, *J* = 8.7 Hz, 2H), 3.83 (s, 3H). <sup>13</sup>C NMR (151 MHz, CDCl<sub>3</sub>) δ 160.62, 143.65, 137.87, 135.59, 134.02, 129.41, 127.25, 123.11, 115.29, 113.17, 109.94, 55.51. HRMS (EI) Calculated for C<sub>16</sub>H<sub>12</sub>ClNOS<sub>2</sub> (M<sup>+</sup>) 333.0049, found 333.0041.

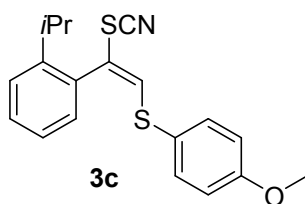

**(E)-(2-(2-isopropylphenyl)-2-thiocyanatovinyl)(4-methoxyphenyl)sulfane (3c).** Yellow oil (26 mg, 77%). <sup>1</sup>H NMR (400 MHz, CDCl<sub>3</sub>) δ 7.43 – 7.41 (m, 2H), 7.33 (d, *J* = 8.8 Hz, 2H), 7.29 – 7.23 (m, 2H), 7.03 (s, 1H), 6.88 (d, *J* = 8.8 Hz, 2H), 3.81 (s, 3H), 3.10 (dt, *J* = 13.7, 6.8 Hz, 1H), 1.30 (d, *J* = 16.4 Hz, 6H). <sup>13</sup>C NMR (151 MHz, CDCl<sub>3</sub>) δ 160.10, 147.62, 138.56, 133.48, 132.83, 130.35, 129.90, 126.53, 126.46, 123.91, 116.50, 115.09, 110.10, 55.47, 30.59, 24.44. HRMS (EI) Calculated for C<sub>19</sub>H<sub>19</sub>NOS<sub>2</sub> (M<sup>+</sup>) 341.0908, found 341.0903.

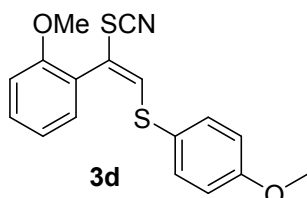

**(E)-(4-methoxyphenyl)(2-(2-methoxyphenyl)-2-thiocyanatovinyl)sulfane (3d).** Yellow oil (22 mg, 69%). <sup>1</sup>H NMR (400 MHz, CDCl<sub>3</sub>) δ 7.44 – 7.35 (m, 4H), 7.08 (s, 1H), 7.06 – 7.02 (m, 1H), 6.99 (d, *J* = 8.3 Hz, 1H), 6.90 – 6.86 (m, 2H), 3.91 (s, 3H), 3.81 (s, 3H). <sup>13</sup>C NMR (151 MHz, CDCl<sub>3</sub>) δ 160.05, 156.66, 140.94, 133.55, 131.24, 130.70, 124.11, 123.86, 120.79, 115.00, 114.40, 111.48, 114.43, 55.73, 55.45. HRMS (EI) Calculated for C<sub>17</sub>H<sub>15</sub>NO<sub>2</sub>S<sub>2</sub> (M<sup>+</sup>) 329.0544, found 329.0551.

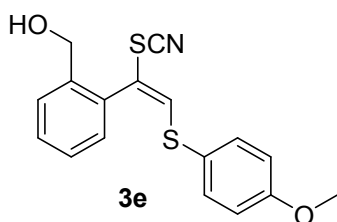

**(E)-(2-(2-((4-methoxyphenyl)thio)-1-thiocyanatovinyl)phenyl)methanol (3e).** Yellow oil (27 mg, 83%). <sup>1</sup>H NMR (600 MHz, CDCl<sub>3</sub>) δ 7.62 (d, *J* = 7.6 Hz, 1H), 7.48 (d, *J* = 7.5, 1H), 7.45 – 7.40 (m, 1H), 7.38 – 7.31 (m, 3H), 7.07 (s, 1H), 6.89 (d, *J* = 8.8 Hz, 2H), 4.78 (d, *J* = 6.2 Hz, 2H), 3.82 (s, 3H), 1.95 (t, *J* = 6.4 Hz, 1H). <sup>13</sup>C NMR (150 MHz, CDCl<sub>3</sub>) δ 160.34, 140.39, 139.18, 133.76, 133.25, 130.29, 129.82, 128.92, 128.70, 123.07, 115.18, 115.11, 110.34, 62.88, 55.48. HRMS (EI) Calculated for C<sub>17</sub>H<sub>15</sub>NO<sub>2</sub>S<sub>2</sub> (M<sup>+</sup>) 329.0544, found 329.0547.

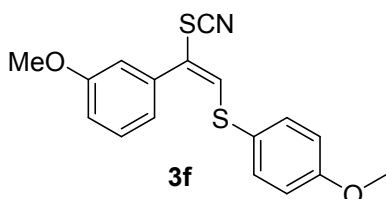

**(E)-(4-methoxyphenyl)(2-(3-methoxyphenyl)-2-thiocyanatovinyl)sulfane (3f).** Yellow oil (26 mg, 79%). <sup>1</sup>H NMR (600 MHz, CDCl<sub>3</sub>) δ 7.41 – 7.36 (m, 3H), 7.21 – 7.18 (m, 1H), 7.15 – 7.12 (m, 1H), 7.08 (s, 1H), 6.96 – 6.93 (m, 1H), 6.92 – 6.89 (m, 2H), 3.86 (s, 3H), 3.82 (s, 3H). <sup>13</sup>C NMR (150 MHz, CDCl<sub>3</sub>) δ 160.30, 159.73, 139.54, 136.15, 133.74, 129.93, 124.19, 121.21, 116.33, 115.25, 115.14, 114.21, 110.63, 55.49, 55.43. HRMS (EI) Calculated for C<sub>17</sub>H<sub>15</sub>NO<sub>2</sub>S<sub>2</sub> (M<sup>+</sup>) 329.0544, found 329.0547.

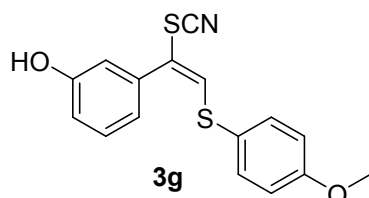

**(E)-3-(2-((4-methoxyphenyl)thio)-1-thiocyanatovinyl)phenol (3g).** Yellow oil (19 mg, 62%). <sup>1</sup>H NMR (600 MHz, CDCl<sub>3</sub>) δ 7.38 (d, *J* = 8.7 Hz, 2H), 7.33 (t, *J* = 7.9 Hz, 1H), 7.17 (d, *J* = 7.7 Hz, 1H), 7.08 (s, 2H), 6.90 (d, *J* = 8.7 Hz, 2H), 6.87 - 6.86 (m, 1H), 5.28 (s, 1H), 3.82 (s, 3H). <sup>13</sup>C NMR (150MHz, CDCl<sub>3</sub>) δ 160.31, 155.86, 139.96, 136.37, 133.76, 130.18, 124.12, 121.35, 116.64, 115.88, 115.62, 115.15, 110.74, 55.49. HRMS (EI) Calculated for C<sub>16</sub>H<sub>13</sub>NO<sub>2</sub>S<sub>2</sub> (M<sup>+</sup>) 315.0388, found 315.0379.

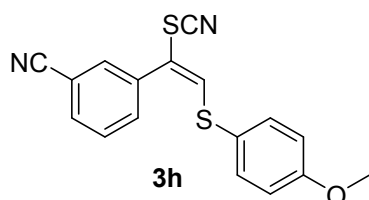

**(E)-2-(3-isocyanophenyl)-2-thiocyanatovinyl(4-methoxyphenyl)sulfane (3h).** Yellow oil (16 mg, 51%). <sup>1</sup>H NMR (600 MHz, CDCl<sub>3</sub>) δ 7.93 (s, 1H), 7.87 (dd, *J* = 7.9, 1.0 Hz, 1H), 7.71 (dd, *J* = 7.7, 1.1 Hz, 1H), 7.62 (t, *J* = 7.8 Hz, 1H), 7.41 (d, *J* = 8.3 Hz, 2H), 7.28 (s, 1H), 6.94 (d, *J* = 8.3 Hz, 2H), 3.85 (s, 3H). <sup>13</sup>C NMR (150 MHz, CDCl<sub>3</sub>) δ 160.66, 143.47, 136.44, 134.02, 133.15, 132.63, 132.40, 129.89, 122.96, 118.12, 115.32, 113.62, 113.34, 109.91, 55.52. HRMS (EI) Calculated for C<sub>17</sub>H<sub>12</sub>N<sub>2</sub>OS<sub>2</sub> (M<sup>+</sup>) 324.0391, found 324.0393.

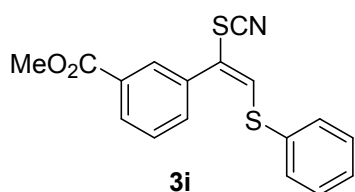

**(E)-3-(2-(phenylthio)-1-thiocyanatovinyl)phenyl acetate (3i).** Yellow oil (19 mg, 60%). <sup>1</sup>H NMR (600 MHz, CDCl<sub>3</sub>) δ 8.27 (t, *J* = 1.5 Hz, 1H), 8.09 (d, *J* = 7.8 Hz, 1H), 7.79 (d, *J* = 7.8 Hz, 1H), 7.57 (t, *J* = 7.8 Hz, 1H), 7.43 (dd, *J* = 8.1, 1.3 Hz, 2H), 7.40 -7.35 (m, 3H), 7.24 (s, 1H), 3.96 (s, 3H). <sup>13</sup>C NMR (150 MHz, CDCl<sub>3</sub>) δ 166.33, 138.53, 135.23, 133.34, 133.22, 131.01, 130.97, 130.58, 130.06, 129.64, 129.13, 128.60, 117.18, 110.10, 52.46. HRMS (EI) Calculated for C<sub>17</sub>H<sub>13</sub>NO<sub>2</sub>S<sub>2</sub> (M<sup>+</sup>) 327.0388, found 327.0380.

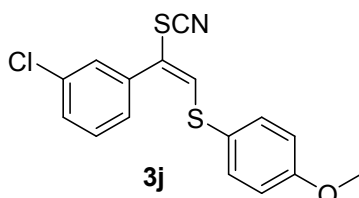

**(E)-2-(3-chlorophenyl)-2-thiocyanatovinyl(4-methoxyphenyl)sulfane (3j).** Yellow oil (23 mg, 71%). <sup>1</sup>H NMR (400 MHz, CDCl<sub>3</sub>) δ 7.59 (d, *J* = 1.7 Hz, 1H), 7.42 – 7.36 (m, 1H), 7.43 – 7.34 (m, 4H), 7.14 (s, 1H), 6.90 (d, *J* = 8.8 Hz, 2H), 3.82 (s, 3H). <sup>13</sup>C NMR (151 MHz, CDCl<sub>3</sub>) δ 160.46, 141.61, 136.71, 134.85, 133.89, 130.14, 129.53, 128.84, 127.10, 123.61, 115.22, 114.77, 110.27, 55.50. HRMS (EI) Calculated for C<sub>16</sub>H<sub>12</sub>ClNOS<sub>2</sub> (M<sup>+</sup>) 333.0049, found 333.0041.

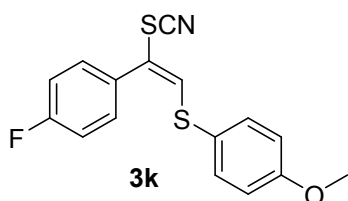

**(E)-2-(3-chlorophenyl)-2-thiocyanatovinyl(4-methoxyphenyl)sulfane (3k).** Yellow oil (26 mg, 83%). <sup>1</sup>H NMR (400 MHz, CDCl<sub>3</sub>) δ 7.62 – 7.57 (m, 2H), 7.38 (d, *J* = 8.8 Hz, 2H), 7.19 – 7.13 (m, 2H), 7.07 (s, 1H), 6.91 (dd, *J* = 6.8, 5.0 Hz, 2H), 3.82 (s, 3H). <sup>19</sup>F NMR (377 MHz, CDCl<sub>3</sub>) δ -110.32 – -110.42 (m). <sup>13</sup>C NMR (150 MHz, CDCl<sub>3</sub>) δ 162.89 (d, *J* = 250.6 Hz), 160.38, 139.75, 133.78, 130.96 (d, *J* = 9.06 Hz), 123.78, 116.04 (d, *J* = 22.6 Hz), 115.96, 115.58, 115.19, 110.43, 55.49. HRMS (EI) Calculated for C<sub>16</sub>H<sub>12</sub>FNOS<sub>2</sub> (M<sup>+</sup>) 317.0344, found 317.0351.

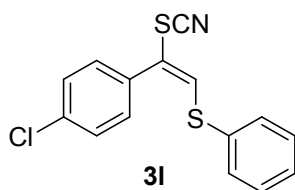

**(E)-2-(4-chlorophenyl)-2-thiocyanatovinyl(phenyl)sulfane (3l).** Yellow oil (25 mg, 85%). <sup>1</sup>H NMR (600 MHz, CDCl<sub>3</sub>) δ 7.57 – 7.54 (m, 2H), 7.47 – 7.42 (m, 4H), 7.41 – 7.35 (m, 3H), 7.19 (s,

1H).  $^{13}\text{C}$  NMR (151 MHz,  $\text{CDCl}_3$ )  $\delta$  137.97, 135.50, 133.36, 133.24, 130.98, 130.27, 129.66, 129.22, 128.61, 117.13, 110.16. HRMS (EI) Calculated for  $\text{C}_{15}\text{H}_{10}\text{ClNS}_2$  ( $\text{M}^+$ ) 302.9943, found 302.9941.

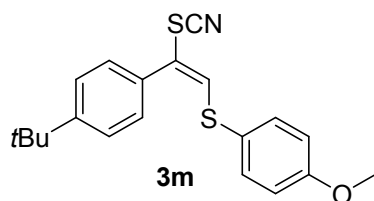

**(E)-2-(4-(tert-butyl)phenyl)-2-thiocyanatovinyl(4-methoxyphenyl)sulfane (3m).** Yellow oil (23 mg, 80%).  $^1\text{H}$  NMR (600 MHz,  $\text{CDCl}_3$ )  $\delta$  7.57 (d,  $J = 8.3$  Hz, 2H), 7.50 (d,  $J = 8.3$  Hz, 2H), 7.41 (d,  $J = 8.5$  Hz, 2H), 7.07 (s, 1H), 6.93 (d,  $J = 8.6$  Hz, 2H), 3.85 (s, 3H), 1.38 (s, 9H).  $^{13}\text{C}$  NMR (150 MHz,  $\text{CDCl}_3$ )  $\delta$  160.22, 152.61, 138.27, 133.64, 131.85, 128.56, 125.76, 124.41, 116.85, 115.11, 110.88, 55.47, 34.88, 31.22. HRMS (EI) Calculated for  $\text{C}_{20}\text{H}_{21}\text{NOS}_2$  ( $\text{M}^+$ ) 355.1065, found 355.1060.

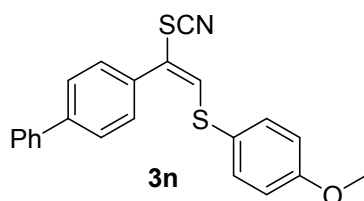

**(E)-2-([1,1'-biphenyl]-4-yl)-2-thiocyanatovinyl(4-methoxyphenyl)sulfane (3n).** Yellow oil (26 mg, 70%).  $^1\text{H}$  NMR (400 MHz,  $\text{CDCl}_3$ )  $\delta$  7.69 (s, 4H), 7.63 (d,  $J = 7.4$  Hz, 2H), 7.47 (t,  $J = 7.5$  Hz, 3H), 7.41 (d,  $J = 8.7$  Hz, 2H), 7.12 (s, 1H), 6.91 (d,  $J = 8.7$  Hz, 2H), 3.82 (s, 3H).  $^{13}\text{C}$  NMR (150 MHz,  $\text{CDCl}_3$ )  $\delta$  160.33, 142.16, 140.17, 139.43, 133.94, 133.76, 129.31, 128.91, 127.83, 127.48, 127.19, 124.15, 116.41, 115.16, 110.72, 55.49. HRMS (EI) Calculated for  $\text{C}_{22}\text{H}_{17}\text{NOS}_2$  ( $\text{M}^+$ ) 375.0752, found 375.0755.

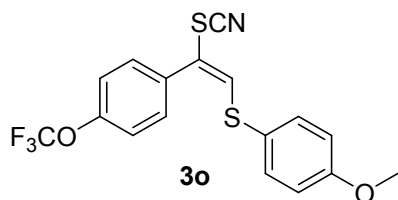

**(E)-2-(4-methoxyphenyl)-2-thiocyanato-2-(4-(trifluoromethoxy)phenyl)vinylsulfane (3o).** Yellow oil (33 mg, 88%).  $^1\text{H}$  NMR (600 MHz,  $\text{CDCl}_3$ )  $\delta$  7.68 (d,  $J = 8.6$  Hz, 2H), 7.41 (d,  $J = 8.6$  Hz, 2H), 7.33 (d,  $J = 8.5$  Hz, 2H), 7.17 (s, 1H), 6.94 (d,  $J = 8.7$  Hz, 2H), 3.85 (s, 3H).  $^{13}\text{C}$  NMR (150 MHz,  $\text{CDCl}_3$ )  $\delta$  160.47, 149.47, 141.15, 133.86, 133.47, 130.57, 123.57, 121.06, 120.40 (q, d = 258 Hz), 117.84, 115.22, 114.93, 110.32, 55.49.  $^{19}\text{F}$  NMR (565 MHz,  $\text{CDCl}_3$ )  $\delta$  -57.65 (s). HRMS (EI)

Calculated for C<sub>17</sub>H<sub>12</sub>F<sub>3</sub>NO<sub>2</sub>S<sub>2</sub> (M<sup>+</sup>) 383.0262, found 383.0260.

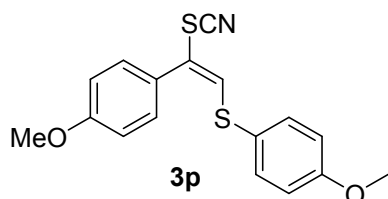

**(E)-(4-methoxyphenyl)(2-(4-methoxyphenyl)-2-thiocyanatovinyl)sulfane (3p).** Yellow oil (23 mg, 77%). <sup>1</sup>H NMR (400 MHz, CDCl<sub>3</sub>) δ 7.54 (d, *J* = 8.8 Hz, 2H), 7.37 (d, *J* = 8.7 Hz, 2H), 6.99 - 6.97 (m, 3H), 6.90 (d, *J* = 8.7 Hz, 2H), 3.85 (s, 3H), 3.81 (s, 3H). <sup>13</sup>C NMR (150 MHz, CDCl<sub>3</sub>) δ 160.25, 160.19, 137.13, 133.61, 130.42, 127.06, 124.35, 116.95, 115.10, 114.19, 110.80, 55.48, 55.40. HRMS (EI) Calculated for C<sub>17</sub>H<sub>15</sub>NO<sub>2</sub>S<sub>2</sub> (M<sup>+</sup>) 329.0544, found 329.0548.

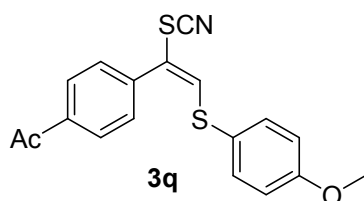

**(E)-1-(4-(2-((4-methoxyphenyl)thio)-1-thiocyanatovinyl)phenyl)ethan-1-one (3q).** Yellow oil (22 mg, 65%). <sup>1</sup>H NMR (400 MHz, CDCl<sub>3</sub>) δ 8.06 (d, *J* = 8.3 Hz, 2H), 7.73 (d, *J* = 8.3 Hz, 2H), 7.40 (d, *J* = 8.7 Hz, 2H), 7.22 (s, 1H), 6.92 (d, *J* = 8.7 Hz, 2H), 3.83 (s, 3H), 2.65 (s, 3H). <sup>13</sup>C NMR (150 MHz, CDCl<sub>3</sub>) δ 197.23, 160.54, 142.39, 139.49, 137.24, 133.92, 129.11, 128.83, 126.65, 123.53, 115.25, 110.25, 55.51, 26.74. HRMS (EI) Calculated for C<sub>18</sub>H<sub>15</sub>NO<sub>2</sub>S<sub>2</sub> (M<sup>+</sup>) 341.0544, found 341.0551.

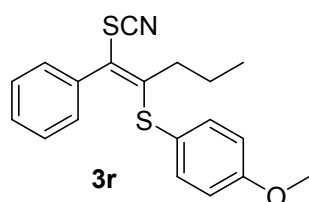

**(E)-(4-methoxyphenyl)(1-phenyl-1-thiocyanatopent-1-en-2-yl)sulfane (3r).** Yellow oil (26 mg, 76%). <sup>1</sup>H NMR (600 MHz, CDCl<sub>3</sub>) δ 7.47 - 7.37 (m, 5H), 7.29 (d, *J* = 8.7 Hz, 2H), 6.84 (d, *J* = 8.7 Hz, 2H), 3.81 (s, 3H), 2.45 - 2.39 (m, 2H), 1.55 (dd, *J* = 15.1, 7.5 Hz, 2H), 0.87 (t, *J* = 7.4 Hz, 3H). <sup>13</sup>C NMR (150 MHz, CDCl<sub>3</sub>) δ 160.32, 149.06, 137.77, 136.02, 129.68, 128.94, 128.71, 122.29, 117.58, 114.75, 110.30, 55.40, 35.69, 22.13, 13.55. HRMS (EI) Calculated for C<sub>19</sub>H<sub>19</sub>NOS<sub>2</sub> (M<sup>+</sup>) 341.0908, found 341.0901.



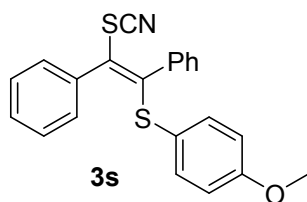

**(E)-(1,2-diphenyl-2-thiocyanatovinyl)(4-methoxyphenyl)sulfane (3s).** Yellow oil (24 mg, 64%).  $^1\text{H}$  NMR (400 MHz,  $\text{CDCl}_3$ )  $\delta$  7.60 – 7.58 (m, 2H), 7.54 – 7.49 (m, 2H), 7.47 – 7.42 (m, 1H), 7.25 – 7.19 (m, 3H), 7.17 – 7.13 (m, 2H), 7.00 (d,  $J = 8.8$  Hz, 2H), 6.56 (d,  $J = 8.8$  Hz, 2H), 3.67 (s, 3H).  $^{13}\text{C}$  NMR (150 MHz,  $\text{CDCl}_3$ )  $\delta$  159.84, 145.75, 136.76, 136.75, 136.06, 129.77, 129.37, 129.32, 128.81, 128.70, 128.29, 122.25, 120.41, 114.14, 110.32, 55.24. HRMS (EI) Calculated for  $\text{C}_{22}\text{H}_{17}\text{NOS}_2$  ( $\text{M}^+$ ) 375.0752, found 375.0759.

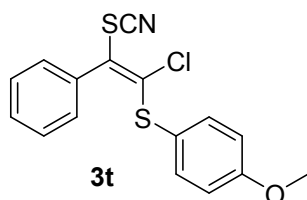

**(Z)-(1-chloro-2-phenyl-2-thiocyanatovinyl)(4-methoxyphenyl)sulfane (3t).** Yellow oil (23 mg, 52%).  $^1\text{H}$  NMR (600 MHz,  $\text{CDCl}_3$ )  $\delta$  7.52 – 7.46 (m, 2H), 7.43 – 7.40 (m, 1H), 7.30 (d,  $J = 8.7$  Hz, 1H), 6.88 (d,  $J = 8.7$  Hz, 1H), 3.82 (s, 2H).  $^{13}\text{C}$  NMR (150 MHz,  $\text{CDCl}_3$ )  $\delta$  160.76, 135.49, 134.98, 131.38, 130.07, 129.62, 128.93, 127.64, 121.54, 114.88, 108.75, 55.43. HRMS (EI) Calculated for  $\text{C}_{16}\text{H}_{12}\text{ClNOS}_2$  ( $\text{M}^+$ ) 333.0049, found 333.0040.

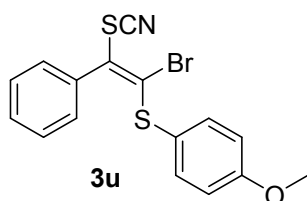

**(Z)-(1-bromo-2-phenyl-2-thiocyanatovinyl)(4-methoxyphenyl)sulfane (3u).** Yellow oil (22 mg, 60%).  $^1\text{H}$  NMR (600 MHz,  $\text{CDCl}_3$ )  $\delta$  7.52 – 7.45 (m, 3H), 7.43 – 7.39 (m, 2H), 7.27 (d,  $J = 8.8$  Hz, 2H), 6.88 (d,  $J = 8.6$  Hz, 2H), 3.82 (s, 3H).  $^{13}\text{C}$  NMR (150 MHz,  $\text{CDCl}_3$ )  $\delta$  160.65, 135.61, 134.99, 132.13, 130.04, 129.27, 128.94, 123.20, 121.38, 114.87, 109.02, 55.43. HRMS (EI) Calculated for  $\text{C}_{16}\text{H}_{12}\text{BrNOS}_2$  ( $\text{M}^+$ ) 376.9544, found 376.9545.

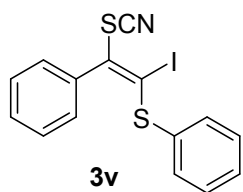

**(Z)-1-iodo-2-phenyl-2-thiocyanatovinyl(phenyl)sulfane (3v).** Yellow oil (18 mg, 46%). <sup>1</sup>H NMR (600 MHz, CDCl<sub>3</sub>) δ 7.59 – 7.58 (m, 1H), 7.50 – 7.45 (m, 3H), 7.45 – 7.35 (m, 3H), 7.35 – 7.30 (m, 3H). <sup>13</sup>C NMR (150 MHz, CDCl<sub>3</sub>) δ 142.85 139.63, 132.41, 130.21, 129.65, 129.14, 128.81, 128.52, 128.02, 112.28, 109.34. HRMS (EI) Calculated for C<sub>15</sub>H<sub>10</sub>INS<sub>2</sub> (M<sup>+</sup>) 394.9299, found 394.9233.

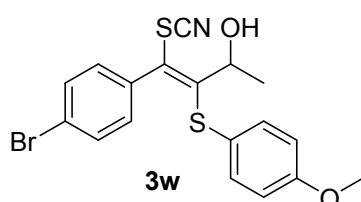

**(E)-4-(4-bromophenyl)-3-((4-methoxyphenyl)thio)-4-thiocyanatobut-3-en-2-ol (3w).** Yellow oil (23 mg, 72%). <sup>1</sup>H NMR (600 MHz, CDCl<sub>3</sub>) δ 7.43 (d, *J* = 8.4 Hz, 2H), 7.07 (d, *J* = 8.4 Hz, 2H), 7.00 (d, *J* = 8.7 Hz, 2H), 6.70 (d, *J* = 8.7 Hz, 2H), 4.91 (p, *J* = 6.3 Hz, 1H), 3.77 (s, 3H), 2.22 (d, *J* = 6.2 Hz, 1H), 1.54 (d, *J* = 6.5 Hz, 3H). <sup>13</sup>C NMR (150 MHz, CDCl<sub>3</sub>) δ 159.73, 147.73, 136.23, 133.99, 131.67, 131.15, 123.94, 123.53, 123.29, 114.78 109.70, 69.85, 55.44, 21.70. HRMS (EI) Calculated for C<sub>18</sub>H<sub>16</sub>BrNO<sub>2</sub>S<sub>2</sub> (M<sup>+</sup>) 420.9806, found 420.9801.

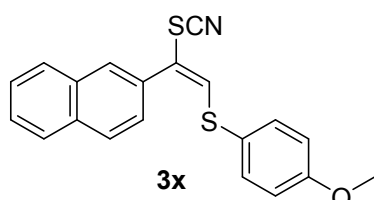

**(E)-4-(4-methoxyphenyl)(2-(naphthalen-2-yl)-2-thiocyanatovinyl)sulfane (3x).** Yellow oil (22 mg, 61%). <sup>1</sup>H NMR (600 MHz, CDCl<sub>3</sub>) δ 8.07 (s, 1H), 7.95 – 7.90 (m, 2H), 7.89 – 7.85 (m, 1H), 7.72 – 7.70 (m, 1H), 7.57 – 7.53 (m, 2H), 7.41 (d, *J* = 8.7 Hz, 2H), 7.17 (s, 1H), 6.91 (d, *J* = 8.7 Hz, 2H), 3.82 (s, 3H). <sup>13</sup>C NMR (150 MHz, CDCl<sub>3</sub>) δ 160.30, 139.67, 133.73, 133.43, 132.95, 132.26, 129.05, 128.78, 128.47, 127.83, 127.26, 126.81, 125.56, 124.14, 116.76, 115.15, 110.66, 55.48. HRMS (EI) Calculated for C<sub>20</sub>H<sub>15</sub>NOS<sub>2</sub> (M<sup>+</sup>) 349.0595, found 349.0590.

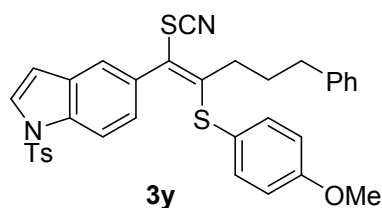

**(E)-5-(2-((4-methoxyphenyl)thio)-5-phenyl-1-thiocyanatopent-1-en-1-yl)-1-tosyl-1H-indole (3y).** Yellow oil (37 mg, 62%).  $^1\text{H NMR}$  (600 MHz,  $\text{CDCl}_3$ )  $\delta$  8.05 (d,  $J = 8.6$  Hz, 1H), 7.83 (d,  $J = 8.4$  Hz, 2H), 7.62 - 7.51 (m, 1H), 7.55 (d,  $J = 1.4$  Hz, 1H), 7.35 - 7.33 (m, 1H), 7.30 - 7.28 (m, 5H), 7.22 (d,  $J = 8.7$  Hz, 3H), 7.12 (d,  $J = 7.2$  Hz, 2H), 6.77 (d,  $J = 8.7$  Hz, 2H), 6.69 (d,  $J = 3.6$  Hz, 1H), 3.82 (s, 3H), 2.59 - 2.50 (m, 4H), 2.38 (s, 3H), 1.97 - 1.85 (m, 2H).  $^{13}\text{C NMR}$  (150 MHz,  $\text{CDCl}_3$ )  $\delta$  160.35, 149.93, 145.25, 141.21, 136.13, 135.30, 134.60, 132.82, 130.72, 130.10, 128.41, 128.37, 127.06, 126.93, 126.01, 122.94, 121.96, 117.10, 114.72, 113.76, 110.41, 109.08, 100.00, 55.37, 35.34, 33.89, 30.39, 21.64. HRMS (EI) Calculated for  $\text{C}_{34}\text{H}_{30}\text{N}_2\text{O}_3\text{S}_3$  ( $\text{M}^+$ ) 610.1419, found 610.1411.

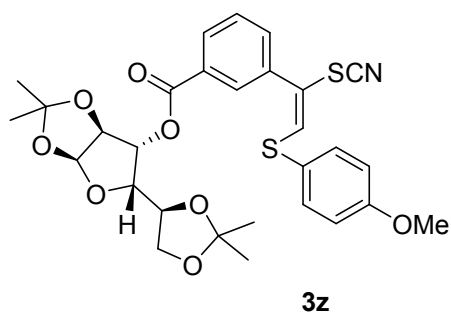

**(3a*S*, 5*S*, 6*R*, 6a*S*)-5-((*S*)-2, 2-dimethyl-1,3-dioxolan-4-yl)-2, 2-dimethyltetrahydrofuro[2, 3-*d*][1, 3]dioxol-6-yl 3-((*E*)-2-((4-methoxyphenyl)thio)-1-thiocyanatovinyl)benzoate (3z).** Yellow oil (39 mg, 68%).  $^1\text{H NMR}$  (600 MHz,  $\text{CDCl}_3$ )  $\delta$  8.27 (s, 1H), 8.05 (d,  $J = 7.8$  Hz, 1H), 7.84 (d,  $J = 7.8$  Hz, 1H), 7.58 (t,  $J = 7.8$  Hz, 1H), 7.39 (d,  $J = 8.6$  Hz, 2H), 7.18 (s, 1H), 6.91 (d,  $J = 8.6$  Hz, 2H), 5.97 (d,  $J = 3.5$  Hz, 1H), 5.51 (d,  $J = 2.7$  Hz, 1H), 4.67 (d,  $J = 3.6$  Hz, 1H), 4.43 (dd,  $J = 9.4, 4.1$  Hz, 1H), 4.33 (dd,  $J = 8.1, 2.8$  Hz, 1H), 4.15 - 4.09 (m, 2H), 3.82 (s, 3H), 1.62 (s, 3H), 1.42 (s, 3H), 1.33 (s, 3H), 1.26 (s, 3H).  $^{13}\text{C NMR}$  (150 MHz,  $\text{CDCl}_3$ )  $\delta$  164.54, 160.51, 141.68, 135.60, 133.92, 133.67, 130.44, 130.18, 129.30, 123.43, 115.25, 112.44, 110.20, 109.51, 105.18, 83.33, 80.00, 72.56, 67.38, 55.50, 26.87, 26.74, 26.22, 25.20. HRMS (EI) Calculated for  $\text{C}_{29}\text{H}_{31}\text{NO}_8\text{S}_2$  ( $\text{M}^+$ ) 585.1491, found 585.1498.

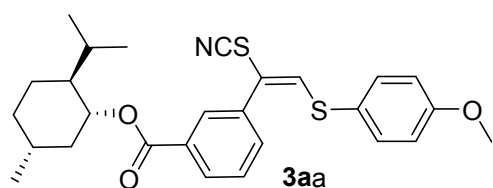

**(1*R*, 2*S*, 5*R*)-2-isopropyl-5-methylcyclohexyl 3-((*E*)-2-((4-methoxyphenyl)thio)-1-thiocyanatovinyl) benzoate (3aa).** Yellow oil (35 mg, 74%). <sup>1</sup>H NMR (600 MHz, CDCl<sub>3</sub>) δ 8.31 (t, *J* = 1.6 Hz, 1H), 8.09 (d, *J* = 7.8 Hz, 1H), 7.84 – 7.80 (m, 1H), 7.58 (t, *J* = 7.8 Hz, 1H), 7.41 (d, *J* = 8.8 Hz, 2H), 7.19 (s, 1H), 6.93 (d, *J* = 8.8 Hz, 2H), 4.98 (td, *J* = 10.9, 4.4 Hz, 1H), 3.85 (s, 3H), 2.21 – 2.16 (m, 1H), 2.04 – 2.02 (m, 1H), 1.78 – 1.75 (m, 2H), 1.62 – 1.59 (m, 2H), 1.21 – 1.12 (m, 2H), 0.98 – 0.94 (m, 7H), 0.84 (d, *J* = 6.9 Hz, 3H). <sup>13</sup>C NMR (150 MHz, CDCl<sub>3</sub>) δ 165.34, 160.41, 141.04, 135.25, 133.85, 132.93, 131.57, 130.36, 130.04, 128.98, 123.77, 115.50, 115.19, 110.36, 75.36, 55.49, 47.26, 40.92, 34.31, 31.48, 26.52, 23.63, 22.08, 20.84, 16.57. HRMS (EI) Calculated for C<sub>27</sub>H<sub>31</sub>NO<sub>3</sub>S<sub>2</sub> (M<sup>+</sup>) 481.1745, found 481.1740.

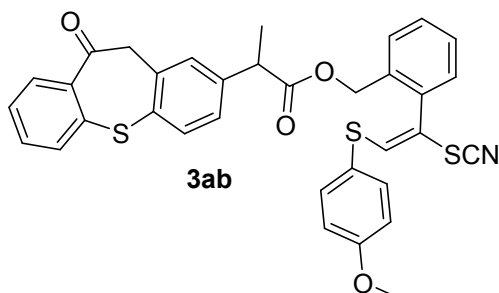

**(*E*)-2-(2-((4-methoxyphenyl)thio)-1-thiocyanatovinyl)benzyl 2-(10-oxo-10, 11-dihydrodibenzo[b, f]thiopin-2-yl)propanoate (3ab).** Yellow oil (36 mg, 60%). <sup>1</sup>H NMR (400 MHz, CDCl<sub>3</sub>) δ 8.19 (dd, *J* = 8.0, 1.5 Hz, 1H), 7.62 – 7.54 (m, 2H), 7.46 – 7.27 (m, 9H), 7.15 (dd, *J* = 8.0, 1.9 Hz, 1H), 6.99 (s, 1H), 6.87 (d, *J* = 8.8 Hz, 2H), 5.30 – 5.12 (m, 2H), 4.32 (s, 2H), 3.81 (s, 3H), 1.50 (d, *J* = 7.2 Hz, 3H). <sup>13</sup>C NMR (150 MHz, CDCl<sub>3</sub>) δ 191.32, 173.68, 160.26, 142.47, 140.18, 137.95, 136.13, 133.95, 133.65, 133.36, 132.55, 131.55, 130.89, 130.10, 129.75, 129.28, 128.71, 126.88, 126.52, 123.15, 115.15, 109.89, 64.30, 55.48, 51.03, 45.17, 18.49. HRMS (EI) Calculated for C<sub>34</sub>H<sub>27</sub>NO<sub>4</sub>S<sub>3</sub> (M<sup>+</sup>) 609.1102, found 609.1106.

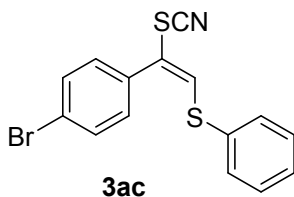

**(*E*)-2-(4-bromophenyl)-2-thiocyanatovinyl(phenyl)sulfane (3ac).** Yellow oil (28 mg, 81%). <sup>1</sup>H NMR (400 MHz, CDCl<sub>3</sub>) δ 7.61 (d, *J* = 8.4 Hz, 2H), 7.48 (d, *J* = 8.4 Hz, 2H), 7.43 (d, *J* = 7.3 Hz, 2H), 7.38 (d, *J* = 7.3 Hz, 2H), 7.19 (s, 1H). <sup>13</sup>C NMR (150 MHz, CDCl<sub>3</sub>) δ 138.08, 133.72, 133.34, 132.17, 130.99, 130.48, 129.66, 128.63, 123.80, 117.13, 110.13. HRMS (EI) Calculated for C<sub>15</sub>H<sub>10</sub>BrNS<sub>2</sub> (M<sup>+</sup>) 346.9438, found 346.9434.

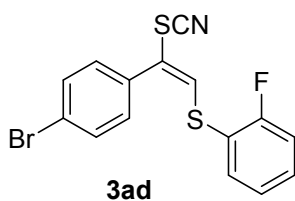

**(E)-2-(2-((4-methoxyphenyl)thio)-1-thiocyanatovinyl)benzyl 2-(10-oxo-10,11-dihydrodibenzo[b,f]thiepin-2-yl)propanoate (3ad).** Yellow oil (32 mg, 88%).  $^1\text{H}$  NMR (600 MHz,  $\text{CDCl}_3$ )  $\delta$  7.64 (d,  $J = 8.6$  Hz, 2H), 7.51 (d,  $J = 8.6$  Hz, 2H), 7.48–7.45 (m, 1H), 7.43 – 7.38 (m, 1H), 7.22 – 7.16 (m, 2H), 7.09 (s, 1H).  $^{13}\text{C}$  NMR (150 MHz,  $\text{CDCl}_3$ )  $\delta$  161.21 (d,  $J = 249.1$  Hz), 138.18, 135.88, 133.55, 133.38, 132.26, 131.16 (d,  $J = 8.0$  Hz), 130.54, 125.16 (d,  $J = 3.9$  Hz), 124.01, 118.44, 116.52 (d,  $J = 21.1$  Hz), 109.89. HRMS (EI) Calculated for  $\text{C}_{15}\text{H}_9\text{BrFNS}_2$  ( $\text{M}^+$ ) 364.9344, found 364.9346.

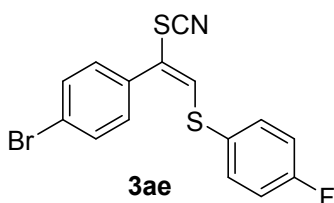

**(E)-2-(2-(4-bromophenyl)-2-thiocyanatovinyl)(4-fluorophenyl)sulfane (3ae).** Yellow oil (33 mg, 90%).  $^1\text{H}$  NMR (600 MHz,  $\text{CDCl}_3$ )  $\delta$  7.65 – 7.62 (m, 1H), 7.51 – 7.48 (m, 1H), 7.47 – 7.43 (m, 1H), 7.14 – 7.09 (m, 2H).  $^{13}\text{C}$  NMR (150 MHz,  $\text{CDCl}_3$ )  $\delta$  163.09 (d,  $J = 250.6$  Hz), 138.19, 133.65 (d,  $J = 9.06$  Hz), 133.57, 132.21, 130.44, 128.42 (d,  $J = 3.5$  Hz), 123.90, 117.15, 116.97 (d,  $J = 22.6$  Hz), 110.04. HRMS (EI) Calculated for  $\text{C}_{15}\text{H}_9\text{BrFNS}_2$  ( $\text{M}^+$ ) 364.9344, found 364.9343.

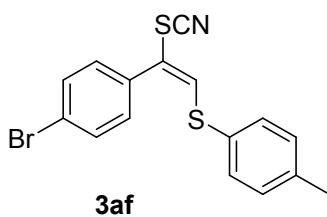

**(E)-2-(2-(4-bromophenyl)-2-thiocyanatovinyl)(p-tolyl)sulfane (3af).** Yellow oil (28 mg, 79%).  $^1\text{H}$  NMR (600 MHz,  $\text{CDCl}_3$ )  $\delta$  7.63 (d,  $J = 8.6$  Hz, 2H), 7.51 (d,  $J = 8.6$  Hz, 2H), 7.35 (d,  $J = 8.1$  Hz, 2H), 7.22 (d,  $J = 7.9$  Hz, 2H), 7.19 (s, 1H), 2.39 (s, 3H).  $^{13}\text{C}$  NMR (150 MHz,  $\text{CDCl}_3$ )  $\delta$  139.39, 139.07, 133.83, 132.13, 131.41, 130.46, 130.40, 129.74, 123.66, 116.17, 110.26, 21.20. HRMS (EI) Calculated for  $\text{C}_{16}\text{H}_{12}\text{BrNS}_2$  360.9595 ( $\text{M}^+$ ), found 360.9599.

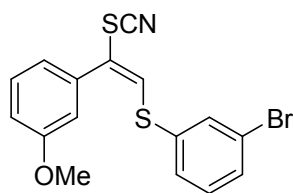

**3ag**

**(E)-(3-bromophenyl)(2-(3-methoxyphenyl)-2-thiocyanatovinyl)sulfane (3ag).** Yellow oil (25 mg, 68%).  $^1\text{H}$  NMR (400 MHz,  $\text{CDCl}_3$ )  $\delta$  7.57–7.56 (m, 1H), 7.48–7.45 (m, 1H), 7.39 (t,  $J = 8.0$  Hz, 1H), 7.37–7.33 (m, 1H), 7.27–7.22 (m, 1H), 7.16–7.13 (m, 1H), 7.09–7.08 (m, 2H), 6.98–6.95 (m, 1H), 3.86 (s, 3H).  $^{13}\text{C}$  NMR (150 MHz,  $\text{CDCl}_3$ )  $\delta$  159.78, 135.92, 135.65, 134.28, 133.08, 131.38, 130.84, 130.06, 129.05, 123.23, 121.21, 120.08, 115.60, 114.26, 110.08, 55.45. HRMS (EI) Calculated for  $\text{C}_{16}\text{H}_{12}\text{BrNOS}_2$  ( $\text{M}^+$ ) 376.9544, found 376.9550.

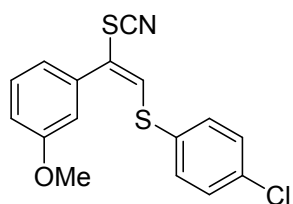

**3ah**

**(E)-(4-chlorophenyl)(2-(3-methoxyphenyl)-2-thiocyanatovinyl)sulfane (3ah).** Yellow oil (23 mg, 70%).  $^1\text{H}$  NMR (400 MHz,  $\text{CDCl}_3$ )  $\delta$  7.41–7.33 (m, 5H), 7.17–7.14 (m, 1H), 7.10–7.08 (m, 1H), 7.06 (s, 1H), 6.97–6.94 (m, 1H), 3.86 (s, 3H).  $^{13}\text{C}$  NMR (150 MHz,  $\text{CDCl}_3$ )  $\delta$  159.78, 135.72, 135.27, 134.68, 132.29, 132.09, 130.04, 129.75, 121.20, 119.28, 115.50, 114.29, 110.20, 55.44. HRMS (EI) Calculated for  $\text{C}_{16}\text{H}_{12}\text{ClNOS}_2$  ( $\text{M}^+$ ) 333.0049, found 333.0052.

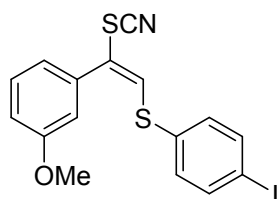

**3ai**

**(E)-(4-iodophenyl)(2-(3-methoxyphenyl)-2-thiocyanatovinyl)sulfane (3ai).** Yellow oil (24 mg, 57%).  $^1\text{H}$  NMR (600 MHz,  $\text{CDCl}_3$ )  $\delta$  7.74–7.70 (m, 2H), 7.42–7.39 (m, 1H), 7.20–7.14 (m, 3H), 7.12–7.10 (m, 1H), 7.08 (s, 1H), 6.99–6.97 (m, 1H), 3.88 (s, 3H).  $^{13}\text{C}$  NMR (150 MHz,  $\text{CDCl}_3$ )  $\delta$  159.77, 138.59, 135.69, 134.67, 133.84, 132.22, 130.05, 121.20, 119.63, 115.53, 114.29, 110.15, 93.92, 55.45. HRMS (EI) Calculated for  $\text{C}_{16}\text{H}_{12}\text{INOS}_2$  ( $\text{M}^+$ ) 424.9405, found 424.9401.

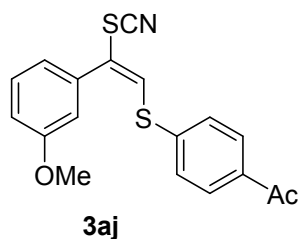

**(E)-1-(4-((2-(3-methoxyphenyl)-2-thiocyanatovinyl)thio)phenyl)ethan-1-one (3aj).** Yellow oil (17 mg, 50%).  $^1\text{H}$  NMR (400 MHz,  $\text{CDCl}_3$ )  $\delta$  7.94 (d,  $J = 8.5$  Hz, 2H), 7.48 – 7.44 (m, 2H), 7.40 (t,  $J = 8.0$  Hz, 1H), 7.17 – 7.13 (m, 2H), 7.10 – 7.07 (m, 1H), 7.00 – 6.95 (m, 1H), 3.86 (s, 3H), 2.60 (s, 3H).  $^{13}\text{C}$  NMR (150 MHz,  $\text{CDCl}_3$ )  $\delta$  196.99, 159.81, 140.33, 135.45, 131.71, 130.11, 129.30, 128.96, 126.09, 121.76, 121.23, 115.69, 114.36, 109.92, 55.46, 26.63. HRMS (EI) Calculated for  $\text{C}_{18}\text{H}_{15}\text{NO}_2\text{S}_2$  ( $\text{M}^+$ ) 341.0544, found 341.0549.

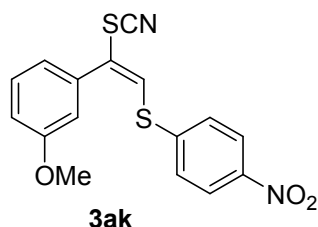

**(E)-2-(3-methoxyphenyl)-2-thiocyanatovinyl(4-nitrophenyl)sulfane (3ak).** Yellow oil (36 mg, 42%).  $^1\text{H}$  NMR (600 MHz,  $\text{CDCl}_3$ )  $\delta$  8.24 (d,  $J = 8.8$  Hz, 2H), 7.51 (d,  $J = 8.8$  Hz, 2H), 7.42 (t,  $J = 8.0$  Hz, 1H), 7.16 – 7.11 (m, 2H), 7.09 – 7.05 (m, 1H), 7.02 – 7.01 (m, 1H), 3.88 (s, 3H).  $^{13}\text{C}$  NMR (150 MHz,  $\text{CDCl}_3$ )  $\delta$  159.87, 146.79, 143.24, 134.97, 130.23, 129.21, 128.66, 128.34, 124.51, 121.20, 115.93, 114.44, 109.51, 55.48. HRMS (EI) Calculated for  $\text{C}_{34}\text{H}_{27}\text{NO}_4\text{S}_3$  ( $\text{M}^+$ ) 344.0289, found 344.0296.

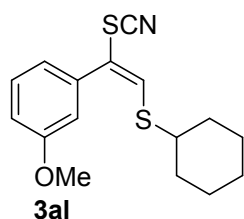

**(E)-cyclohexyl(2-(3-methoxyphenyl)-2-thiocyanatovinyl)sulfane (3al).** Yellow oil (21 mg, 71%).  $^1\text{H}$  NMR (400 MHz,  $\text{CDCl}_3$ )  $\delta$  7.34 (t,  $J = 8.0$  Hz, 1H), 7.16 – 7.14 (m, 1H), 7.10 – 7.09 (m, 2H), 6.89 (d,  $J = 8.3$  Hz, 1H), 3.84 (s, 3H), 3.01 – 2.92 (m, 1H), 2.08 – 1.98 (m, 2H), 1.80 – 1.77 (m, 2H), 1.44 – 1.24 (m, 7H).  $^{13}\text{C}$  NMR (150 MHz,  $\text{CDCl}_3$ )  $\delta$  159.59, 137.49, 136.61, 129.74, 121.20, 115.39, 114.87, 114.20, 110.97, 55.37, 47.80, 33.66, 25.85, 25.35. HRMS (EI) Calculated for  $\text{C}_{16}\text{H}_{19}\text{NOS}_2$  ( $\text{M}^+$ ) 305.0908, found 305.0911.

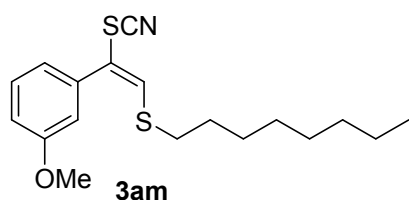

**(E)-2-(3-methoxyphenyl)-2-thiocyanatovinyl(octyl)sulfane (3am).** Yellow oil (25 mg, 76%).  $^1\text{H}$  NMR (400 MHz,  $\text{CDCl}_3$ )  $\delta$  7.34 (t,  $J = 8.0$  Hz, 1H), 7.15 (d,  $J = 7.7$  Hz, 1H), 7.10 (s, 1H), 7.01 (s, 1H), 6.90 (d,  $J = 8.3$  Hz, 1H), 3.83 (s, 3H), 2.78 (t,  $J = 7.4$  Hz, 2H), 1.71 – 1.61 (m, 2H), 1.41 – 1.34 (m, 2H), 1.27 (s, 8H), 0.88 (t,  $J = 6.5$  Hz, 3H).  $^{13}\text{C}$  NMR (150 MHz,  $\text{CDCl}_3$ )  $\delta$  159.63, 138.99, 136.50, 129.78, 121.17, 115.70, 114.96, 114.15, 110.85, 55.36, 35.55, 31.78, 30.23, 29.13, 29.06, 28.44, 22.64, 14.11. HRMS (EI) Calculated for  $\text{C}_{18}\text{H}_{25}\text{NOS}_2$  ( $\text{M}^+$ ) 335.1378, found 335.1374.

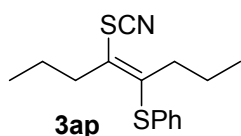

**(E)-phenyl(5-thiocyanatooct-4-en-4-yl)sulfane (3ap).** Yellow oil (19 mg, 71%).  $^1\text{H}$  NMR (400 MHz,  $\text{CDCl}_3$ )  $\delta$  7.53 – 7.11 (m, 5H), 2.93 – 2.83 (m, 2H), 2.37 – 2.28 (m, 2H), 1.76 – 1.64 (m, 2H), 1.54 – 1.43 (m, 2H), 1.00 (t,  $J = 7.3$  Hz, 3H), 0.81 (t,  $J = 7.3$  Hz, 3H).  $^{13}\text{C}$  NMR (150 MHz,  $\text{CDCl}_3$ )  $\delta$  142.10, 133.06, 131.63, 129.27, 127.77, 126.25, 110.28, 37.24, 36.14, 21.74, 21.75, 13.43, 13.39. HRMS (EI) Calculated for  $\text{C}_{15}\text{H}_{19}\text{NS}_2$  ( $\text{M}^+$ ) 277.0959, found 277.0964.

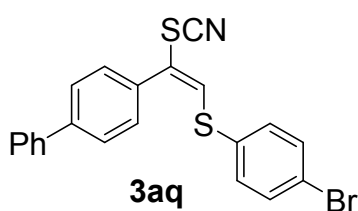

**(E)-2-([1,1'-biphenyl]-4-yl)-2-thiocyanatovinyl(4-bromophenyl)sulfane (3aq).** Yellow oil (1.57 g, 62%).  $^1\text{H}$  NMR (400 MHz,  $\text{CDCl}_3$ )  $\delta$  7.71 – 7.61 (m, 6H), 7.55 – 7.47 (m, 4H), 7.39 (t,  $J = 7.4$  Hz, 1H), 7.31 (d,  $J = 8.5$  Hz, 2H), 7.10 (s, 1H).  $^{13}\text{C}$  NMR (150 MHz,  $\text{CDCl}_3$ )  $\delta$  142.58, 140.02, 134.80, 133.28, 132.94, 132.71, 132.22, 129.36, 128.95, 127.94, 127.56, 127.19, 122.69, 119.65, 110.24. HRMS (EI) Calculated for  $\text{C}_{21}\text{H}_{14}\text{BrNS}_2$  ( $\text{M}^+$ ) 422.9751, found 422.9757.

## 5. General procedure for regioselective thiocyanatothiolation of alkenes



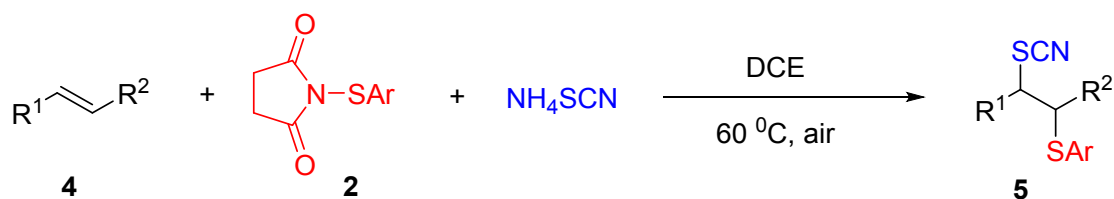

An oven-dried glass vial was charged with *N*-thiosuccinimides (0.12 mmol),  $\text{NH}_4\text{SCN}$  (0.20 mmol) and alkenes (0.10 mmol). Then, DCE (0.5 mL) was added and the mixture was heated to 60 °C and stirred for 12 h under air. After that, water was added to quench the reaction, and the resulting aqueous mixture was extracted with ethyl acetate (3 x 5 mL). The combined organic layers were dried over  $\text{Na}_2\text{SO}_4$  and concentrated. The crude product was further purified by silica gel column chromatography.

## 6. Characterization data for the products 5

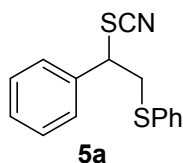

**Phenyl(2-phenyl-2-thiocyanatoethyl)sulfane (5a).** Yellow oil (16 mg, 61%).  $^1\text{H}$  NMR (400 MHz,  $\text{CDCl}_3$ )  $\delta$  7.42 – 7.27 (m, 10H), 4.46 – 4.43 (m, 1H), 3.69 – 3.56 (m, 2H).  $^{13}\text{C}$  NMR (100 MHz,  $\text{CDCl}_3$ )  $\delta$  136.31, 133.59, 131.18, 129.46, 129.40, 129.22, 127.83, 127.62, 111.25, 52.34, 39.96. HRMS (EI) Calculated for  $\text{C}_{15}\text{H}_{13}\text{NS}_2$  ( $\text{M}^+$ ) 271.0489, found 271.0493.

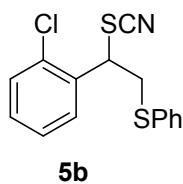

**(2-(2-chlorophenyl)-2-thiocyanatoethyl)(phenyl)sulfane (5b).** Yellow oil (19 mg, 62%).  $^1\text{H}$  NMR (600 MHz,  $\text{CDCl}_3$ )  $\delta$  7.45 – 7.40 (m, 4H), 7.36 – 7.30 (m, 5H), 4.96 – 4.90 (m, 1H), 3.73 – 3.64 (m, 2H).  $^{13}\text{C}$  NMR (150 MHz,  $\text{CDCl}_3$ )  $\delta$  134.22, 133.97, 133.31, 131.71, 130.33, 130.26, 129.39, 128.23, 127.87, 127.62, 110.69, 47.94, 39.32. HRMS (EI) Calculated for  $\text{C}_{15}\text{H}_{12}\text{ClNS}_2$  ( $\text{M}^+$ ) 305.0100, found 305.0109.

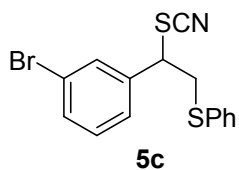

**(2-(3-bromophenyl)-2-thiocyanatoethyl)(phenyl)sulfane (5c).** Yellow oil (19 mg, 55%).  $^1\text{H}$  NMR (600 MHz,  $\text{CDCl}_3$ )  $\delta$  7.52 - 7.50 (m, 1H), 7.43 (d,  $J = 1.7$  Hz, 1H), 7.40 - 7.29 (m, 5H), 7.28 - 7.22 (m, 2H), 4.41-4.38 (m, 1H), 3.65 - 3.55 (m, 2H).  $^{13}\text{C}$  NMR (150 MHz,  $\text{CDCl}_3$ )  $\delta$  138.58, 133.18, 132.58, 131.40, 130.91, 130.70, 129.47, 127.88, 126.50, 123.13, 110.75, 51.62, 39.84. HRMS (EI) Calculated for  $\text{C}_{15}\text{H}_{12}\text{BrNS}_2$  ( $\text{M}^+$ ) 348.9595, found 348.9590.

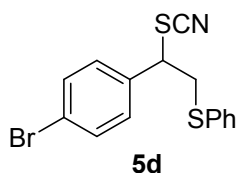

**(2-(4-bromophenyl)-2-thiocyanatoethyl)(phenyl)sulfane (5d).** Yellow oil (19 mg, 60%).  $^1\text{H}$  NMR (600 MHz,  $\text{CDCl}_3$ )  $\delta$  7.52 (d,  $J = 8.4$  Hz, 2H), 7.38 - 7.31 (m, 5H), 7.17 (d,  $J = 8.4$  Hz, 2H), 4.42 - 4.40 (m, 1H), 3.67 - 3.54 (m, 2H).  $^{13}\text{C}$  NMR (150 MHz,  $\text{CDCl}_3$ )  $\delta$  135.36, 133.24, 132.39, 131.37, 129.46, 127.81, 123.59, 110.84, 51.64, 39.81. HRMS (EI) Calculated for  $\text{C}_{15}\text{H}_{12}\text{BrNS}_2$  ( $\text{M}^+$ ) 348.9595, found 348.9590.

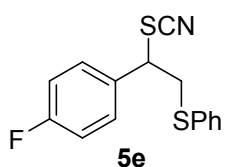

**(2-(4-fluorophenyl)-2-thiocyanatoethyl)(phenyl)sulfane (5e).** Yellow oil (15 mg, 54%).  $^1\text{H}$  NMR (400 MHz,  $\text{CDCl}_3$ )  $\delta$  7.37 - 7.24 (m, 7H), 7.06 (t,  $J = 8.6$  Hz, 2H), 4.45 - 4.41 (m, 1H), 3.67 - 3.52 (m, 2H).  $^{19}\text{F}$  NMR (377 MHz,  $\text{CDCl}_3$ )  $\delta$  -111.10 - -111.25 (m).  $^{13}\text{C}$  NMR (100 MHz,  $\text{CDCl}_3$ )  $\delta$  163.05 (d,  $J = 250.4$  Hz), 133.37, 132.16 (d,  $J = 3.4$  Hz), 131.30, 129.73 (d,  $J = 8.5$  Hz), 129.44, 127.76, 116.39 (d,  $J = 22.2$  Hz), 111.01, 51.64, 40.05. HRMS (EI) Calculated for  $\text{C}_{15}\text{H}_{12}\text{FNS}_2$  ( $\text{M}^+$ ) 289.0395, found 289.0390.

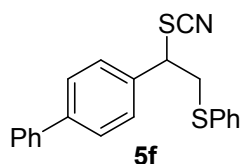

**(2-((1,1'-biphenyl)-4-yl)-2-thiocyanatoethyl)(phenyl)sulfane (5f).** Yellow oil (17 mg, 51%). <sup>1</sup>H NMR (400 MHz, CDCl<sub>3</sub>) δ 7.57 (d, *J* = 8.0 Hz, 4H), 7.45 (t, *J* = 7.6 Hz, 2H), 7.41 – 7.25 (m, 8H), 4.52 – 4.48 (m, 1H), 3.72 – 3.60 (m, 2H). <sup>13</sup>C NMR (150 MHz, CDCl<sub>3</sub>) δ 142.35, 140.11, 135.14, 133.62, 131.26, 129.40, 128.91, 128.29, 127.87, 127.81, 127.63, 127.15, 111.27, 52.23, 39.99. HRMS (EI) Calculated for C<sub>21</sub>H<sub>17</sub>NS<sub>2</sub> (M<sup>+</sup>) 347.0802, found 347.0809.

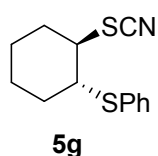

**(2-(2-chlorophenyl)-2-thiocyanatoethyl)(phenyl)sulfane (5g).** Yellow oil (12 mg, 47%). <sup>1</sup>H NMR (400 MHz, CDCl<sub>3</sub>) δ 7.55 – 7.46 (m, 2H), 7.40 – 7.28 (m, 3H), 3.25– 3.17 (m, 1H), 3.05– 2.99 (m, 1H), 2.52 – 2.39 (m, 1H), 2.28 – 2.15 (m, 1H), 1.84 – 1.70 (m, 3H), 1.58 – 1.24 (m, 3H). <sup>13</sup>C NMR (100 MHz, CDCl<sub>3</sub>) δ 134.18, 131.80, 129.20, 128.45, 111.63, 52.18, 51.47, 33.56, 33.51, 25.08, 25.04. HRMS (EI) Calculated for C<sub>13</sub>H<sub>15</sub>NS<sub>2</sub> (M<sup>+</sup>) 249.0646, found 249.0653.

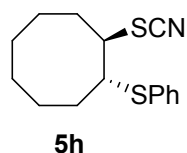

**phenyl((1R,2R)-2-thiocyanatocyclooctyl)sulfane (5h).** Yellow oil (19 mg, 53%). <sup>1</sup>H NMR (400 MHz, CDCl<sub>3</sub>) δ 7.52 – 7.44 (m, 2H), 7.38 – 7.28 (m, 3H), 3.60 – 3.55 (m, 1H), 3.39 – 3.32 (m, 1H), 2.40 – 2.30 (m, 1H), 2.25 – 2.10 (m, 2H), 1.91 – 1.78 (m, 3H), 1.72 – 1.58 (m, 3H), 1.55 – 1.41 (m, 3H). <sup>13</sup>C NMR (100 MHz, CDCl<sub>3</sub>) δ 133.32, 133.11, 129.25, 128.07, 112.49, 55.13, 53.31, 31.52, 31.28, 25.96, 25.92, 25.64, 25.28. HRMS (EI) Calculated for C<sub>15</sub>H<sub>19</sub>NS<sub>2</sub> (M<sup>+</sup>) 277.0959, found 277.0963.

## 7. X-ray Crystallographic Analysis of product 3aq

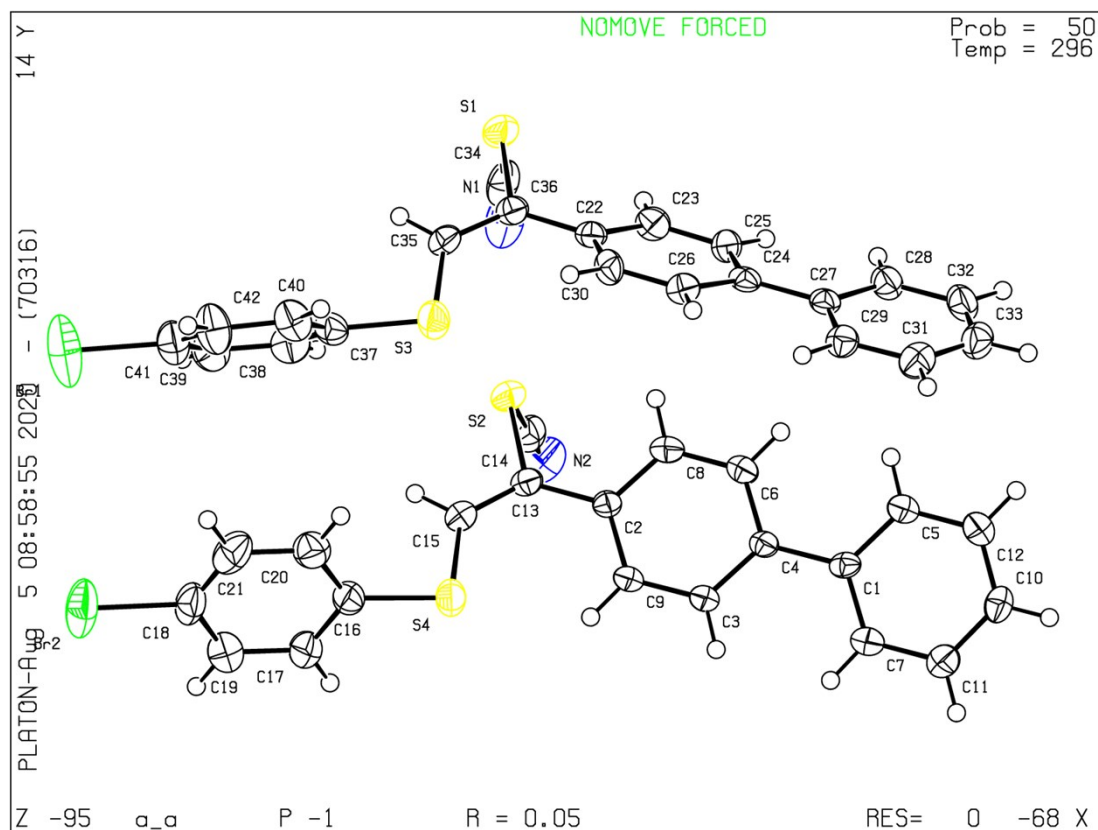

Table 1. Crystal data and structure refinement for A\_a.

|                      |                                                     |                 |
|----------------------|-----------------------------------------------------|-----------------|
| Identification code  | a_a                                                 |                 |
| Empirical formula    | C <sub>21</sub> H <sub>14</sub> Br N S <sub>2</sub> |                 |
| Formula weight       | 424.36                                              |                 |
| Temperature          | 296(2) K                                            |                 |
| Wavelength           | 0.71073 Å                                           |                 |
| Crystal system       | Triclinic                                           |                 |
| Space group          | P-1                                                 |                 |
| Unit cell dimensions | a = 9.4365(5) Å                                     | α = 89.393(3)°. |
|                      | b = 9.6809(7) Å                                     | β = 88.231(3)°. |
|                      | c = 20.5558(11) Å                                   | γ = 74.156(3)°. |
| Volume               | 1805.64(19) Å <sup>3</sup>                          |                 |
| Z                    | 4                                                   |                 |

|                                   |                                             |
|-----------------------------------|---------------------------------------------|
| Density (calculated)              | 1.561 Mg/m <sup>3</sup>                     |
| Absorption coefficient            | 2.511 mm <sup>-1</sup>                      |
| F(000)                            | 856                                         |
| Crystal size                      | 0.180 x 0.160 x 0.150 mm <sup>3</sup>       |
| Theta range for data collection   | 1.982 to 26.772°.                           |
| Index ranges                      | -10<=h<=11, -9<=k<=12, -26<=l<=24           |
| Reflections collected             | 15061                                       |
| Independent reflections           | 7459 [R(int) = 0.0426]                      |
| Completeness to theta = 25.242°   | 97.8 %                                      |
| Absorption correction             | None                                        |
| Refinement method                 | Full-matrix least-squares on F <sup>2</sup> |
| Data / restraints / parameters    | 7459 / 0 / 451                              |
| Goodness-of-fit on F <sup>2</sup> | 0.984                                       |
| Final R indices [I>2sigma(I)]     | R1 = 0.0537, wR2 = 0.1525                   |
| R indices (all data)              | R1 = 0.0927, wR2 = 0.1764                   |
| Extinction coefficient            | n/a                                         |
| Largest diff. peak and hole       | 1.253 and -1.001 e.Å <sup>-3</sup>          |

## 8. Copies of NMR Spectra

### 1. $^1\text{H}$ NMR of **3a** (600 MHz, $\text{CDCl}_3$ )

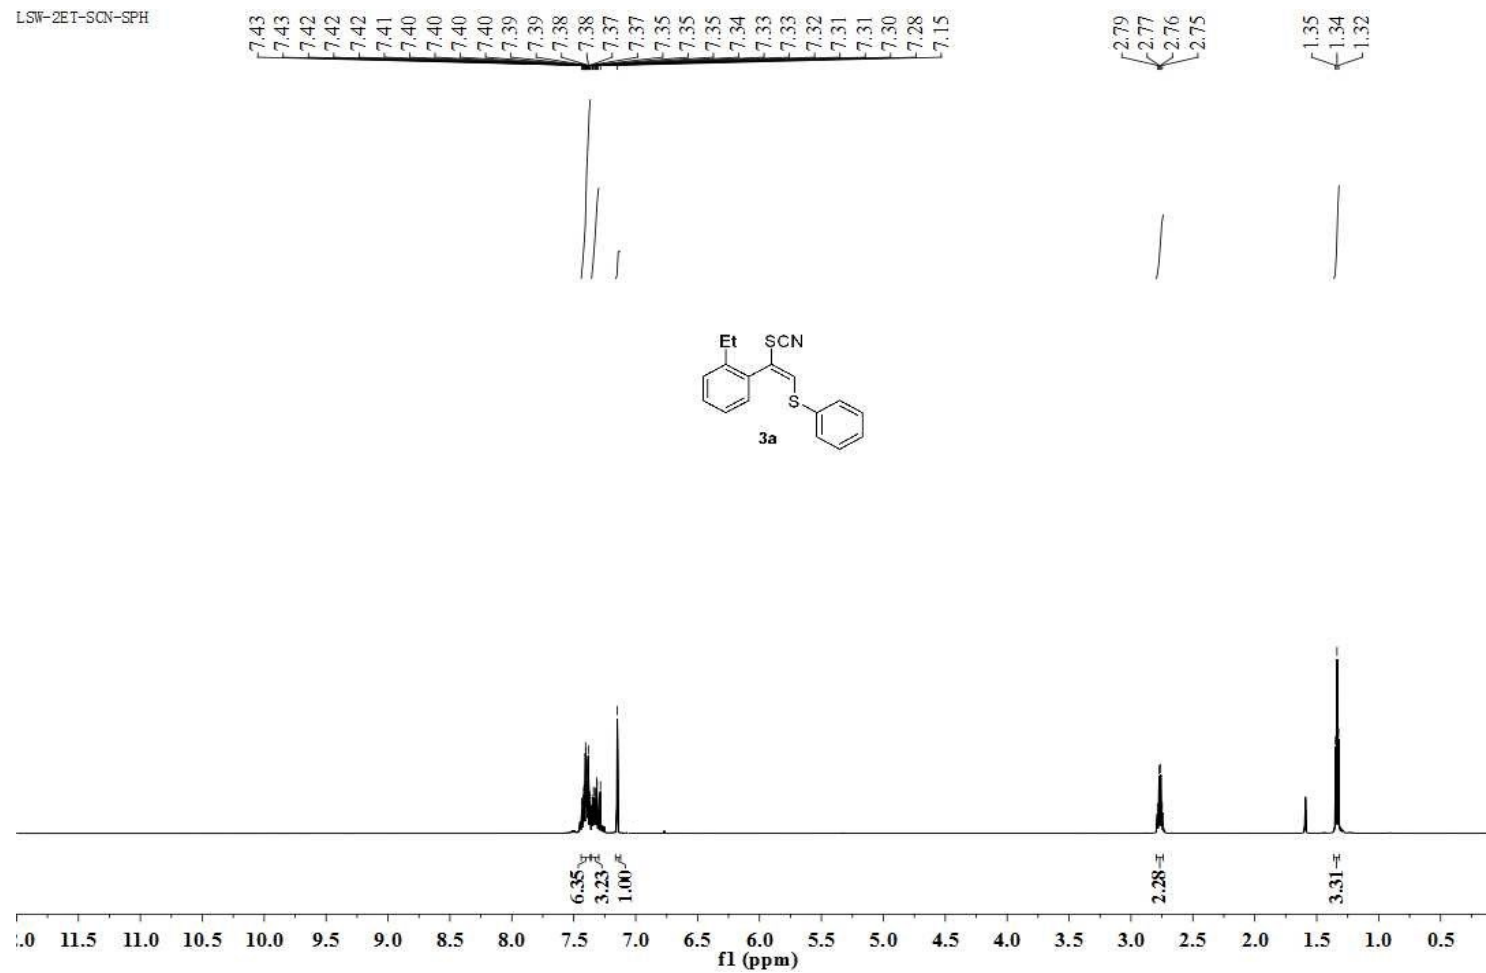

2.  $^{13}\text{C}$  NMR of **3a** (125 MHz,  $\text{CDCl}_3$ )

LSW-2ET-SCN-SPH

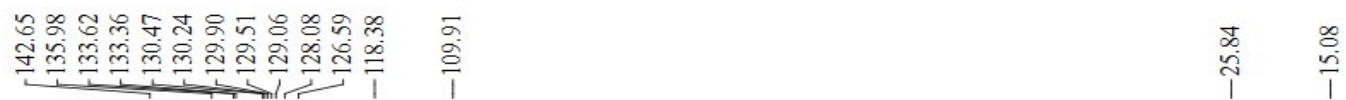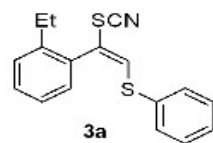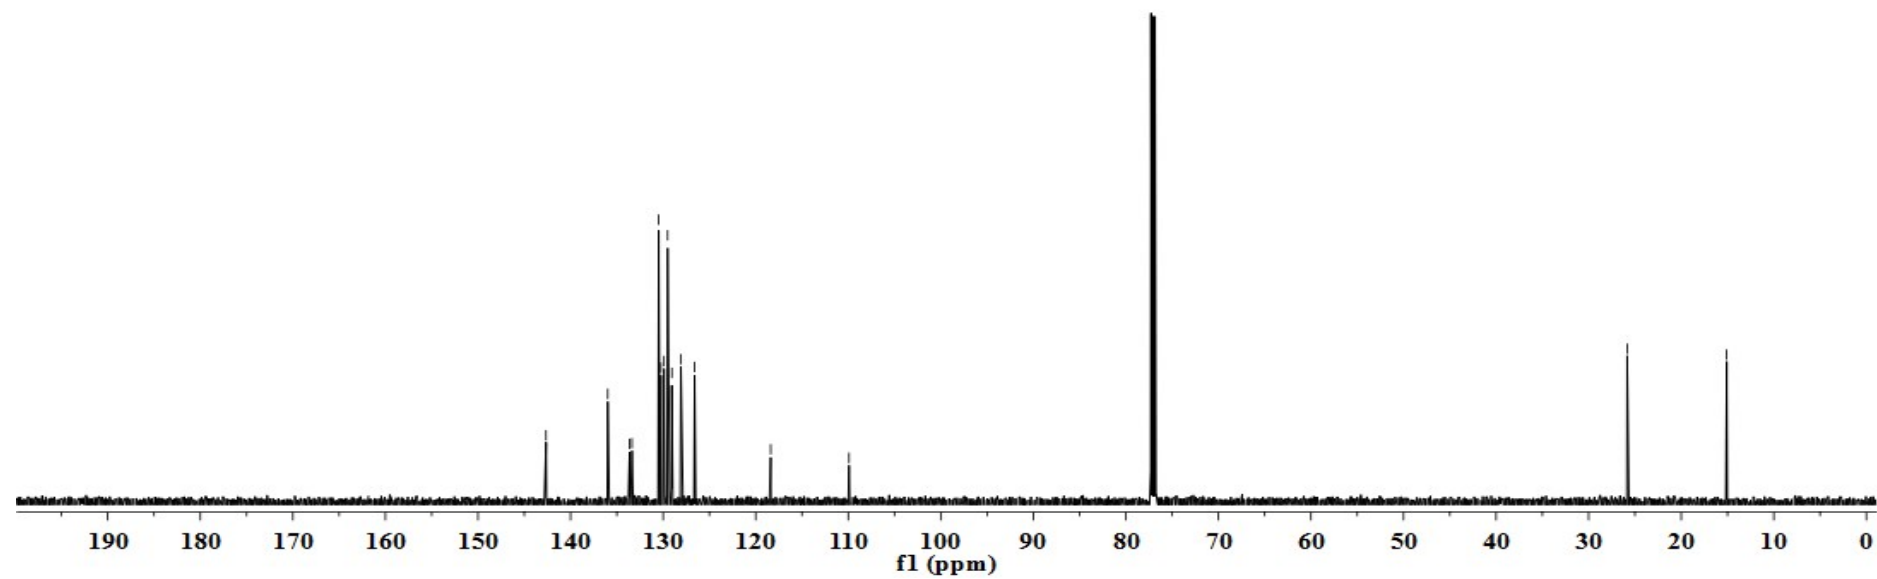

3.  $^1\text{H}$  NMR of **3b** (600 MHz,  $\text{CDCl}_3$ )

LSW-2CL-SCN-SOME

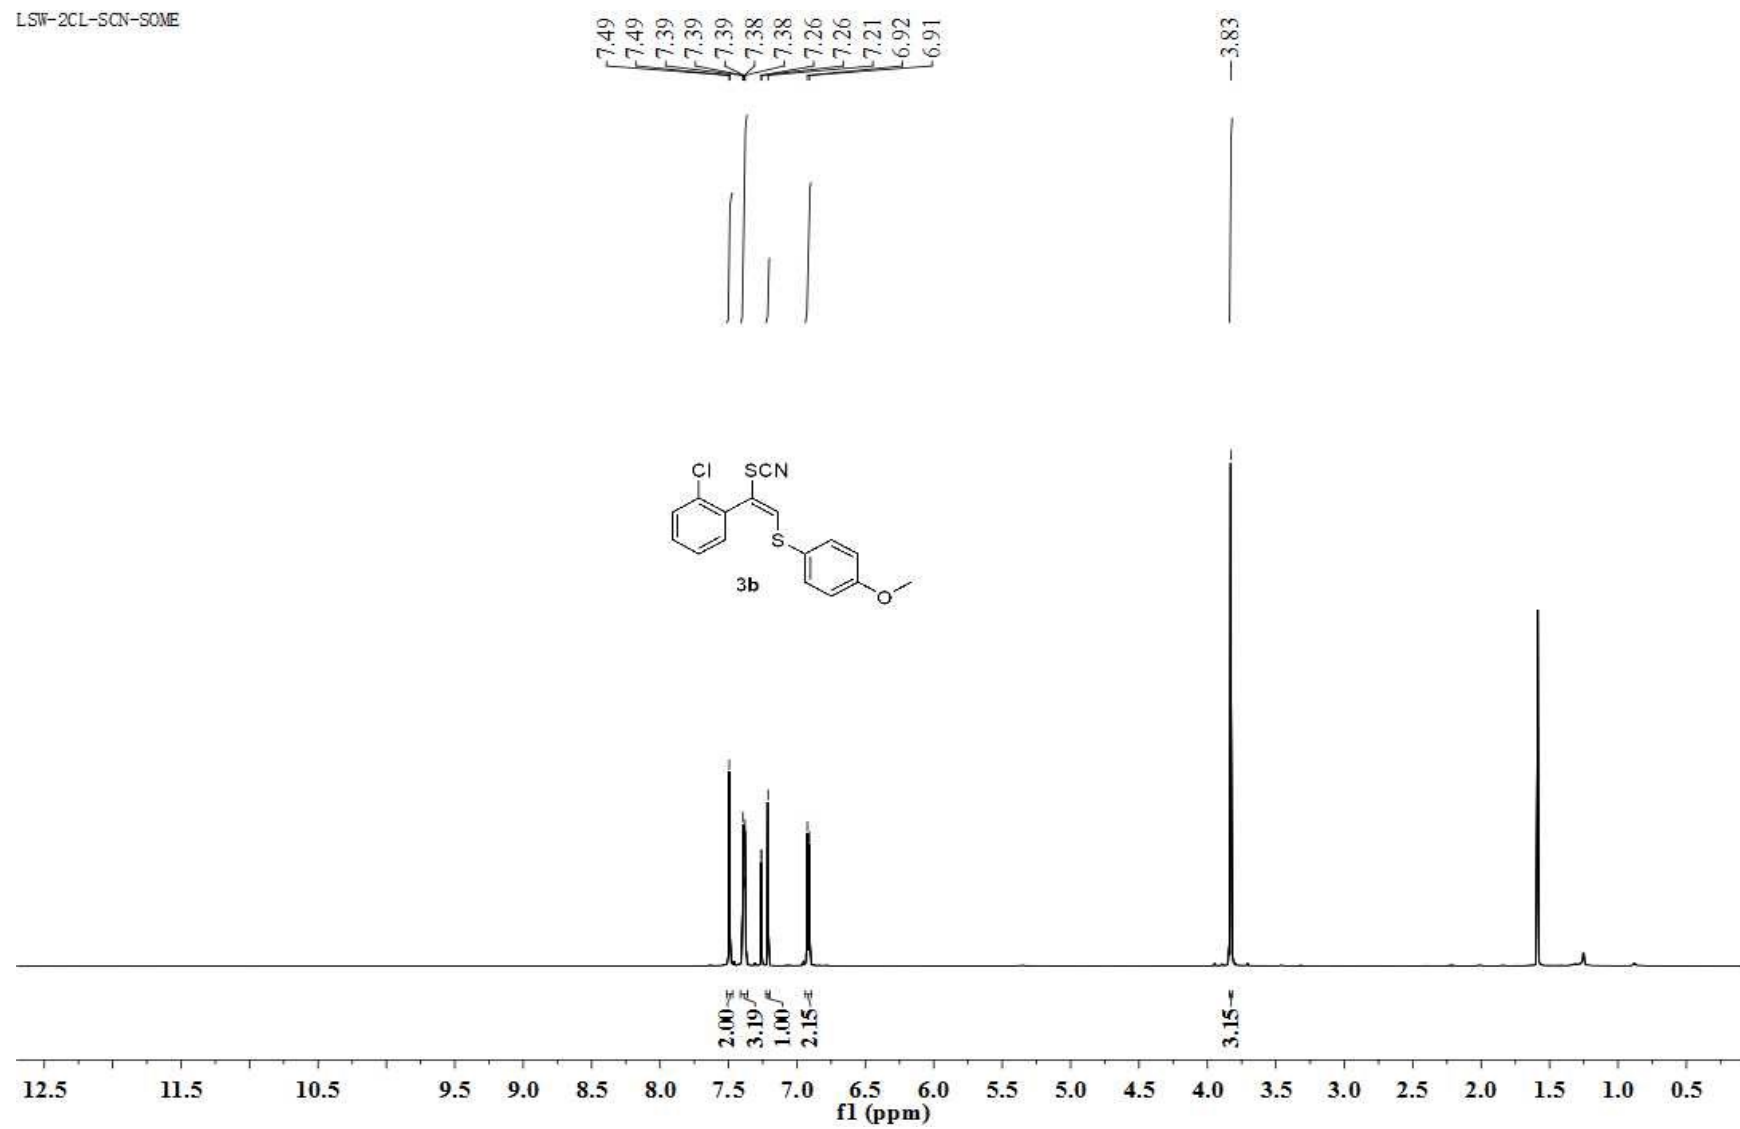



4.  $^{13}\text{C}$  NMR of **3b** (125 MHz,  $\text{CDCl}_3$ )

LSW-2CL-SCN-SOME

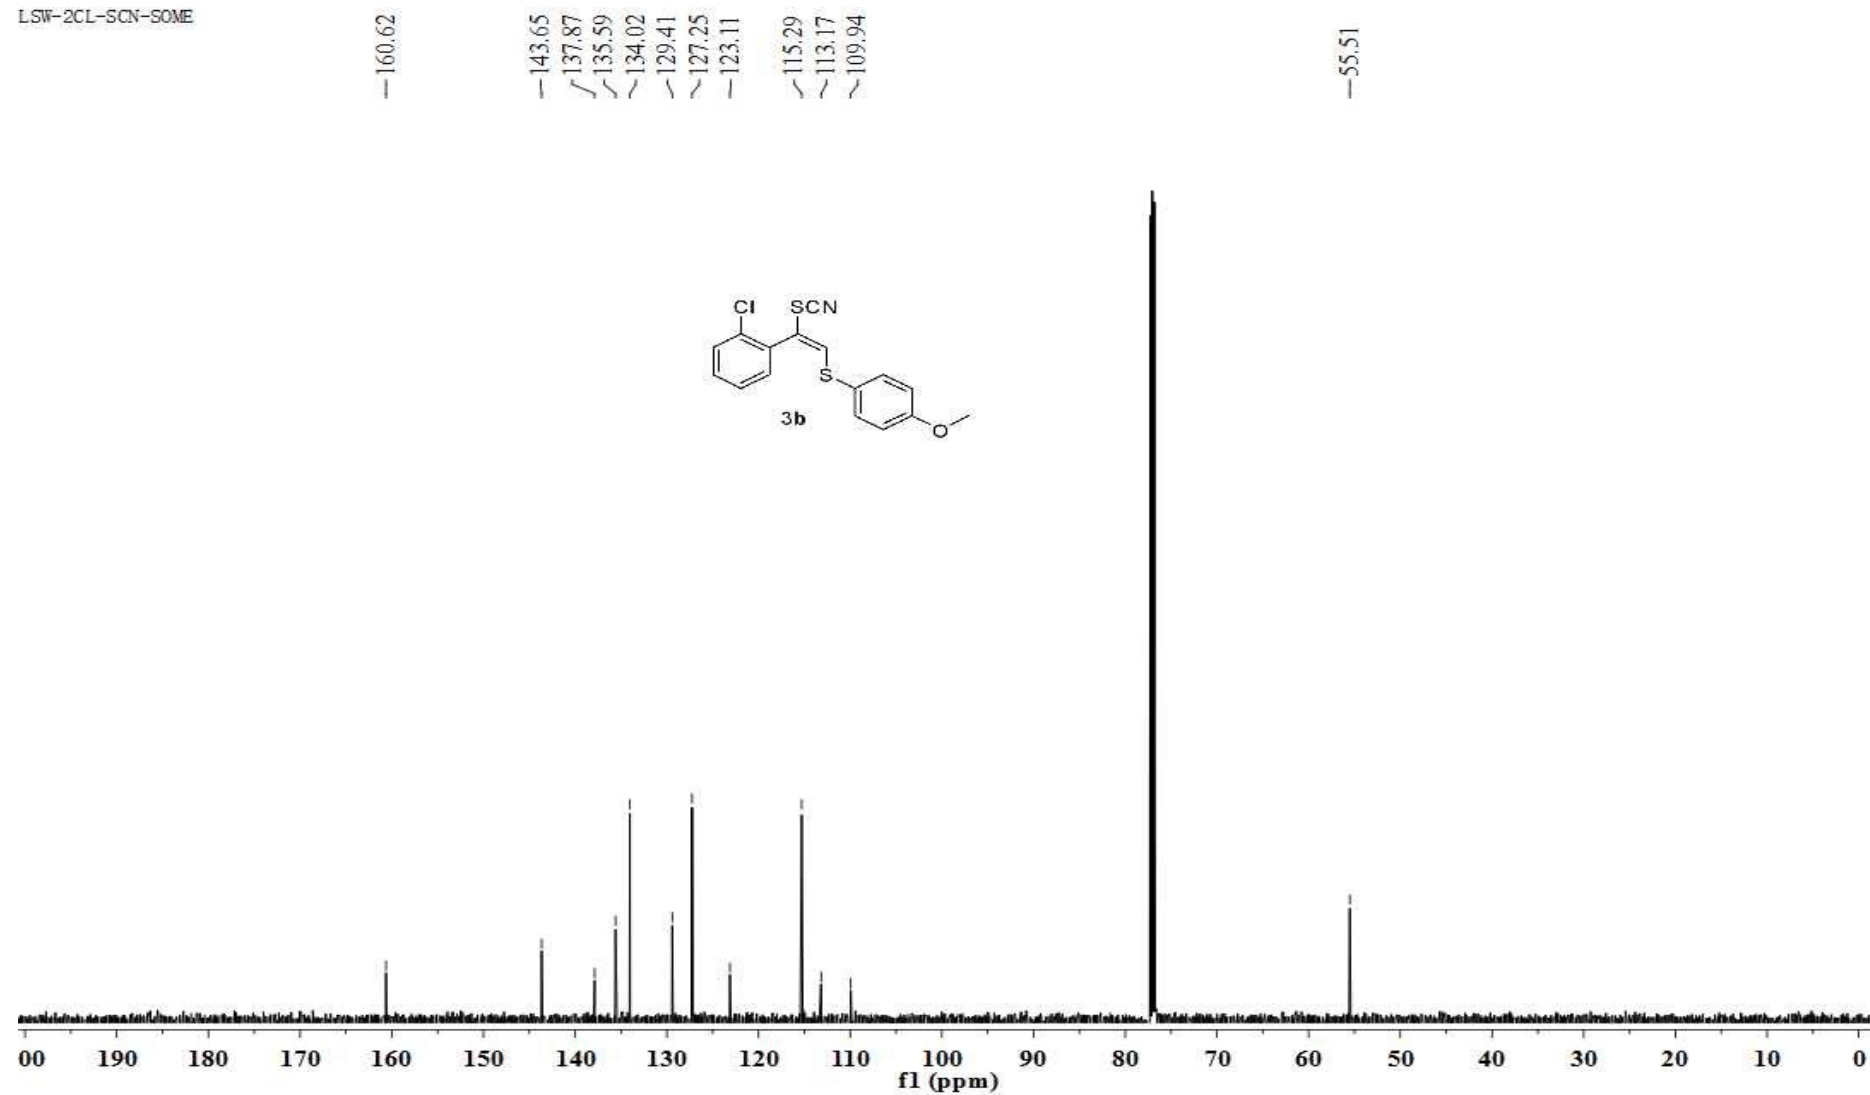

5.  $^1\text{H}$  NMR of **3c** (600 MHz,  $\text{CDCl}_3$ )

LSW-2IPR-SCN-SOME

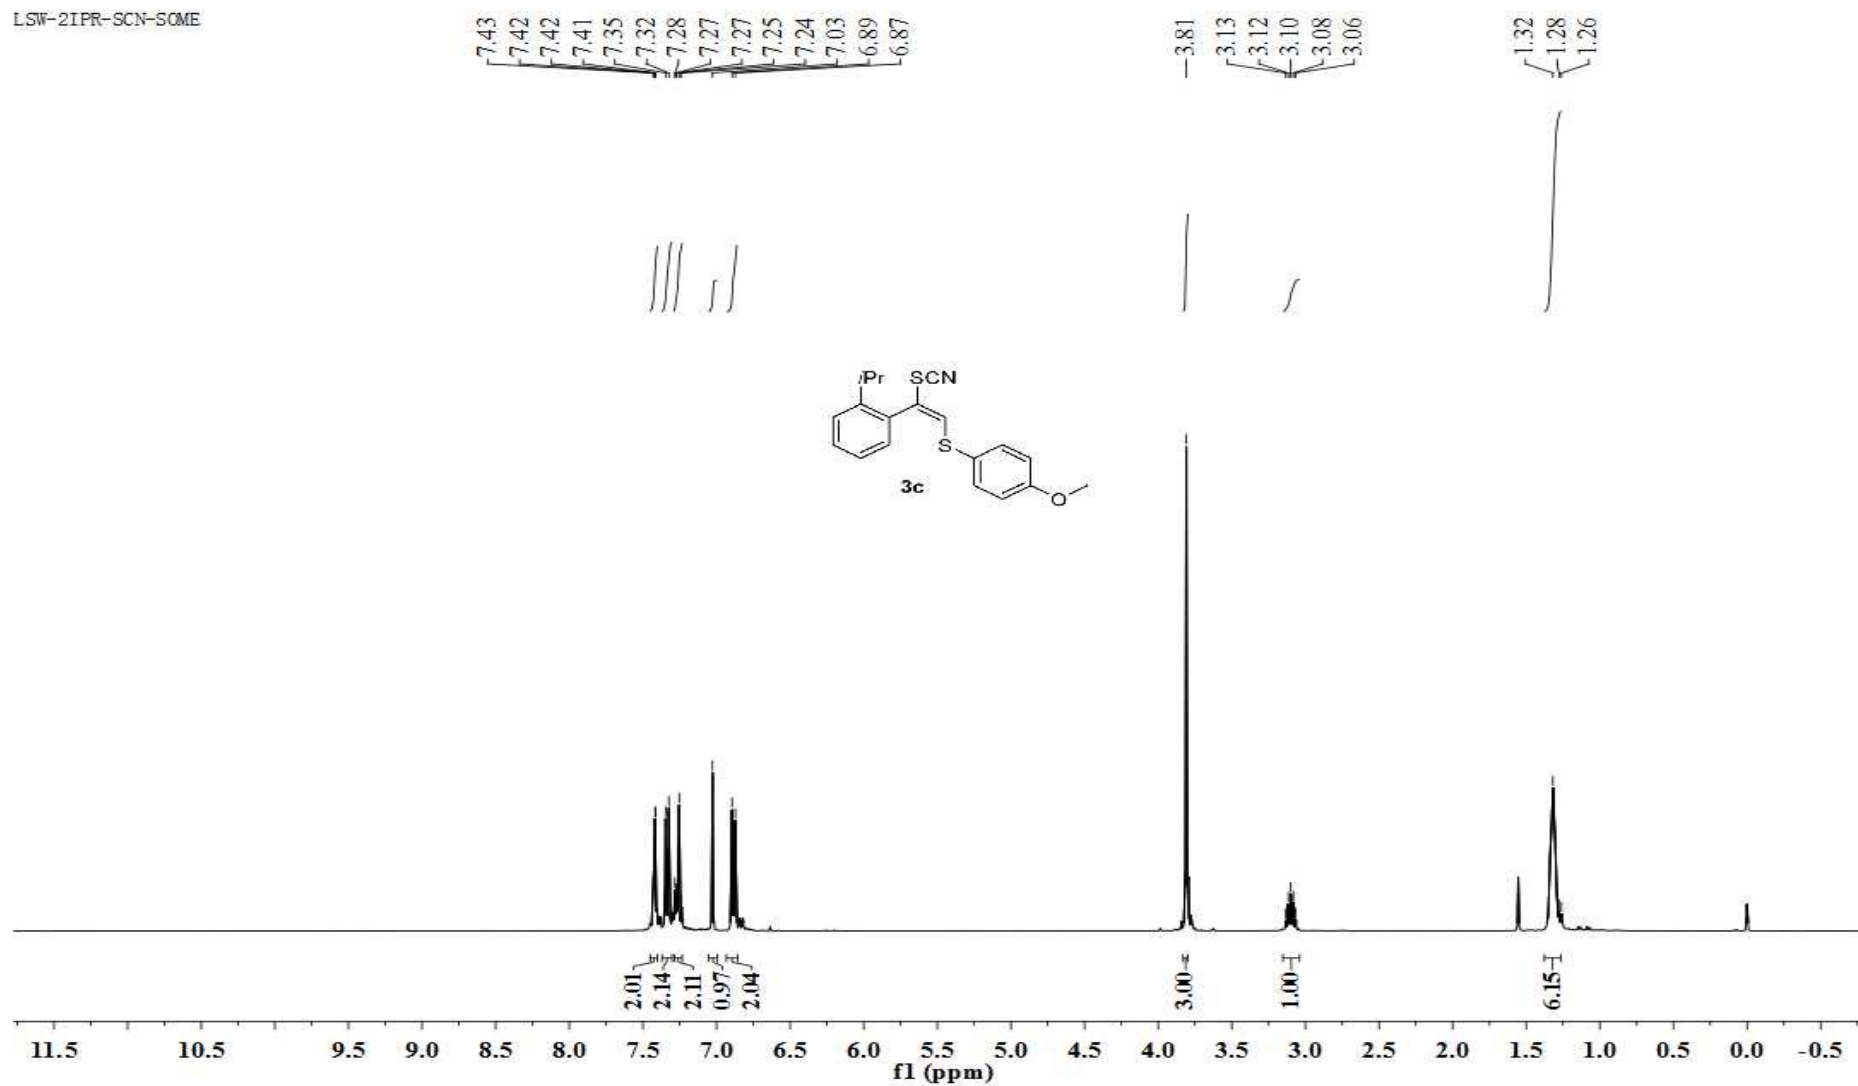

6.  $^{13}\text{C}$  NMR of **3c** (125 MHz,  $\text{CDCl}_3$ )

LSW-2IPR-SCN-SOME

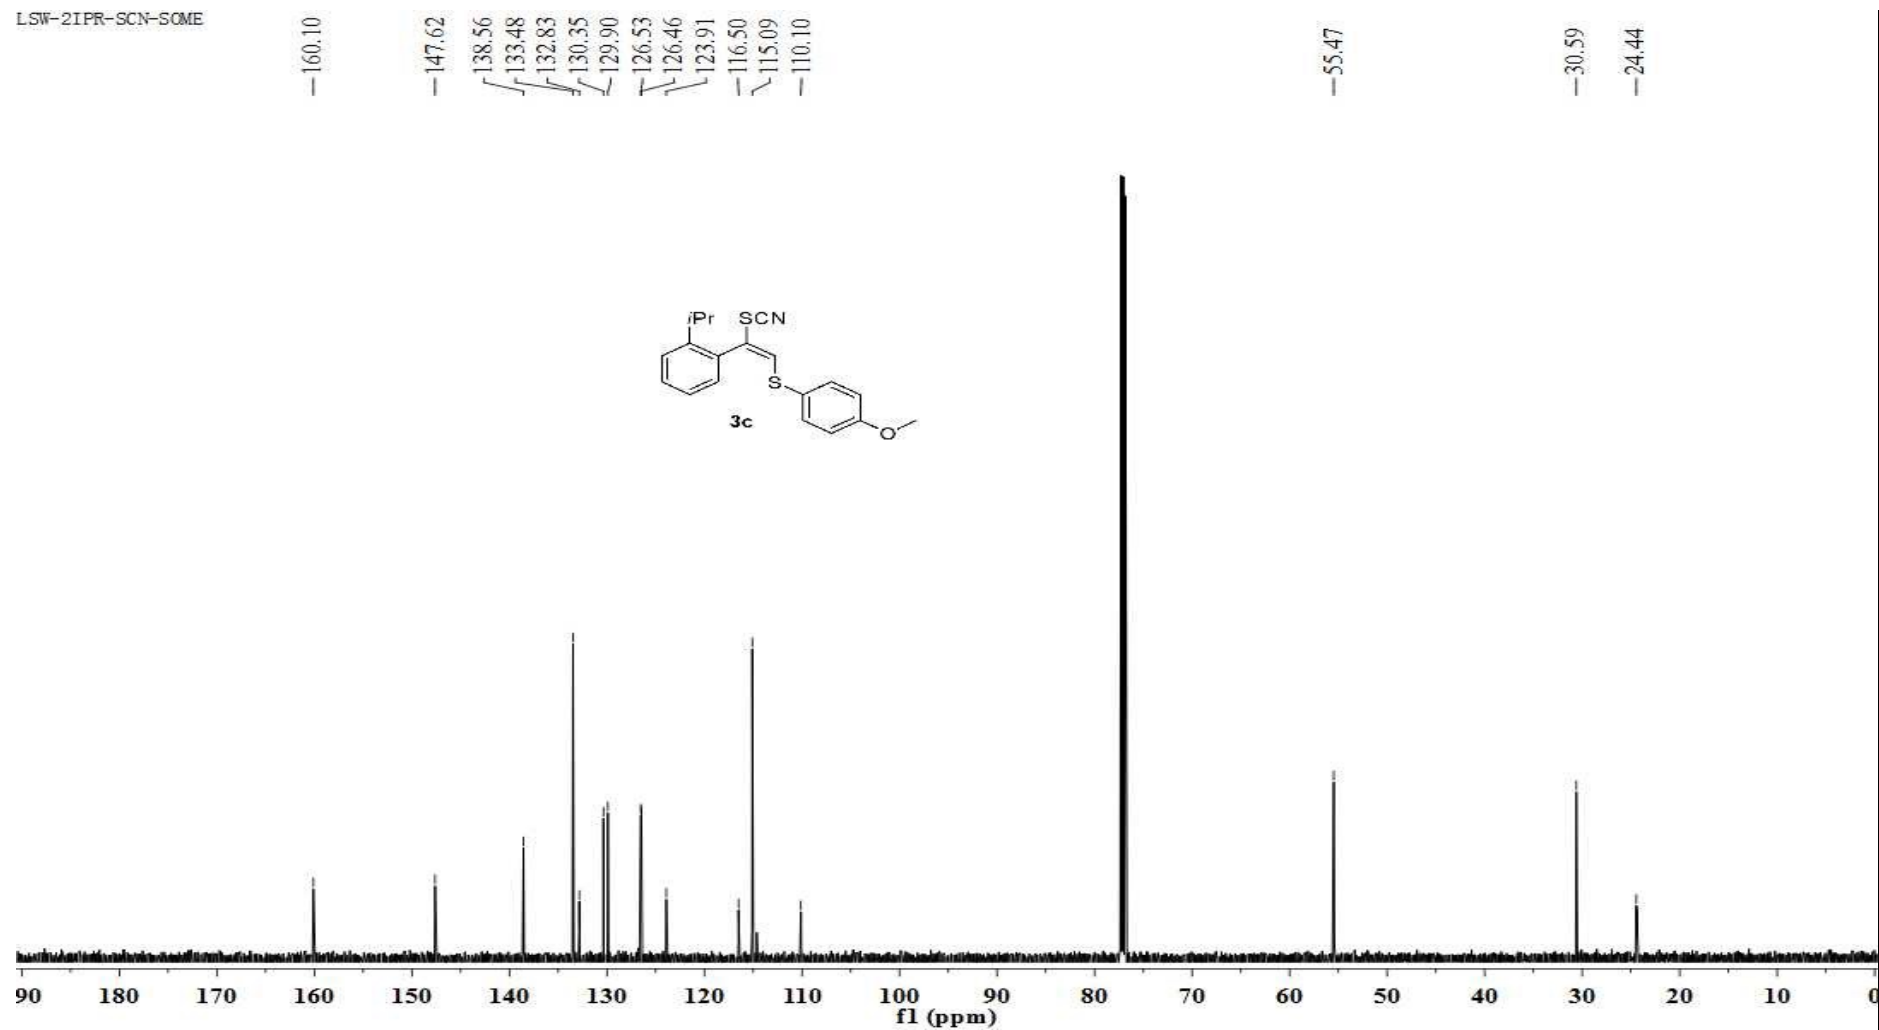

7.  $^1\text{H}$  NMR of **3d** (600 MHz,  $\text{CDCl}_3$ )

LSW-20ME-SCN-SOME

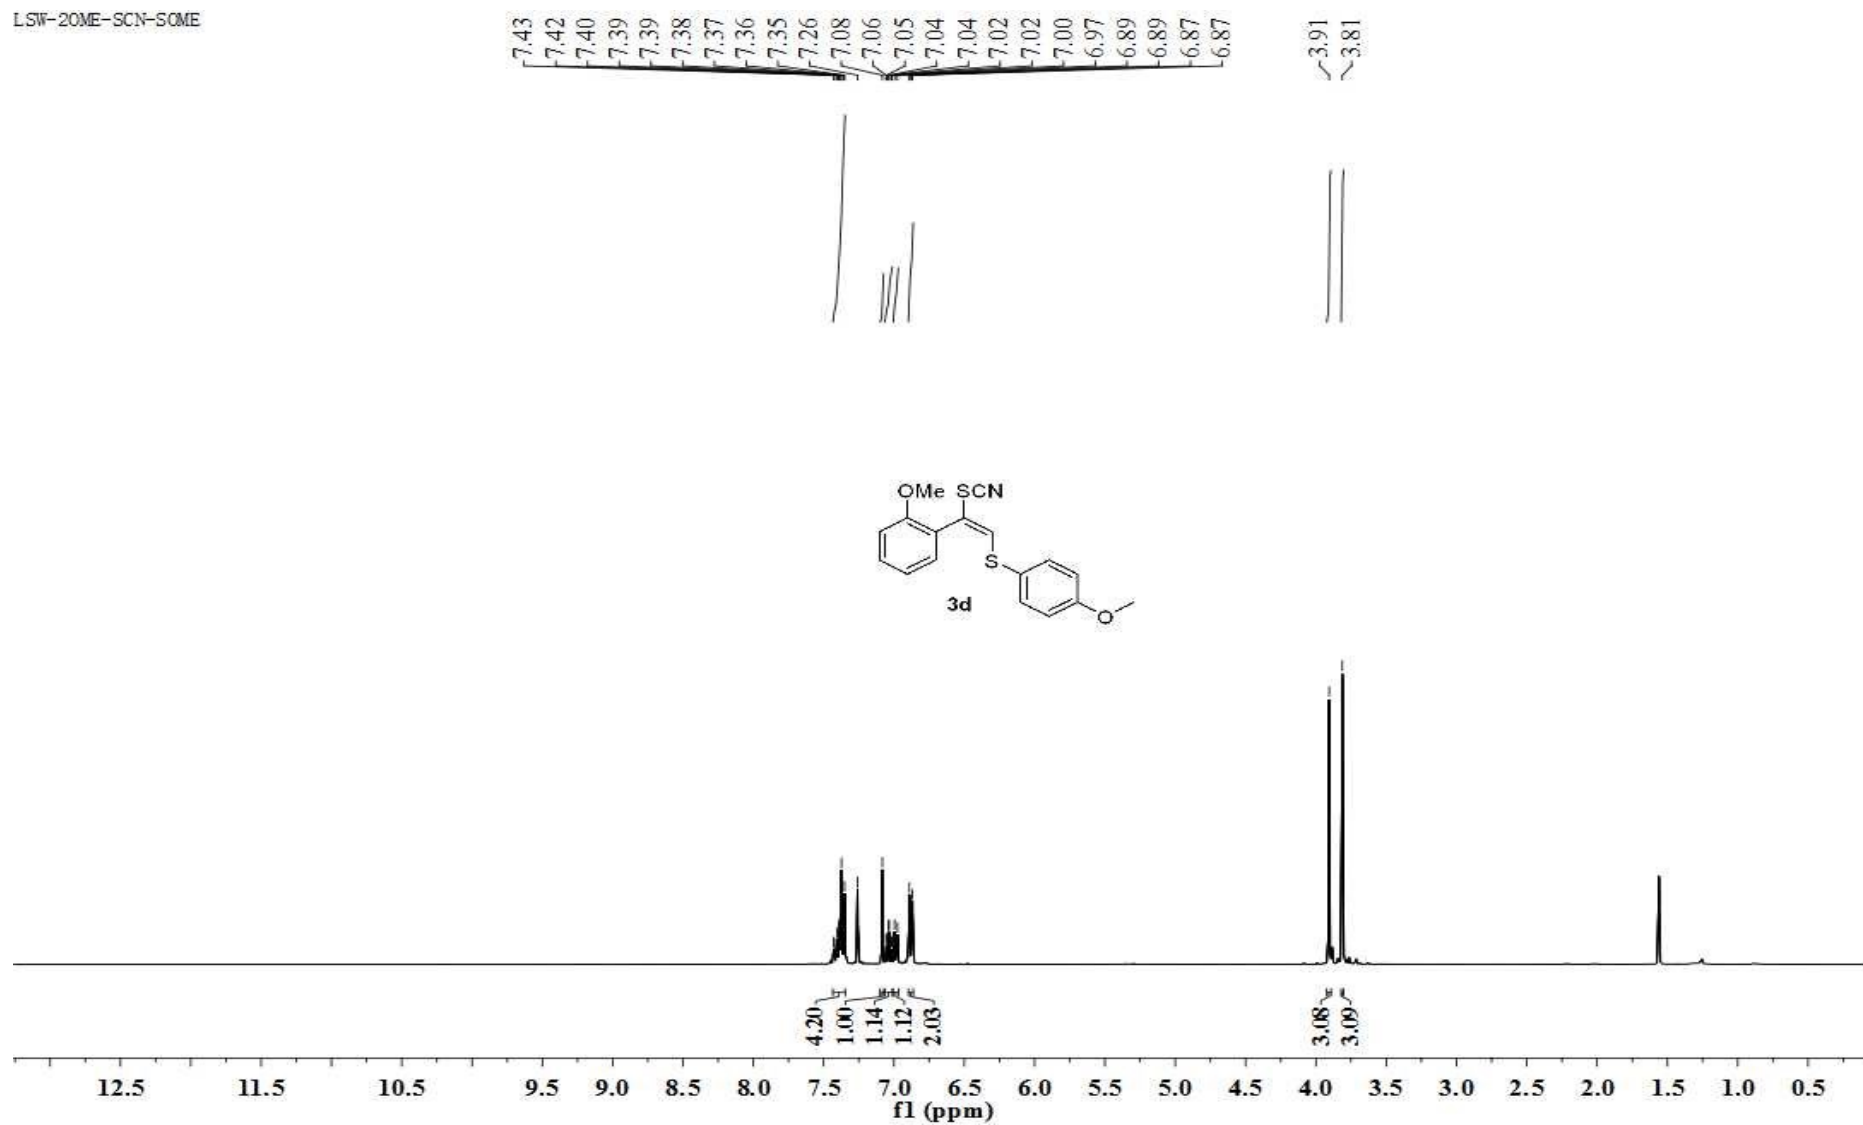

8. <sup>13</sup>C NMR of **3d** (125 MHz, CDCl<sub>3</sub>)

LSW-20ME-SCN-SOME

— 160.05  
— 156.66

— 140.94  
— 133.55  
— 131.24  
— 130.70  
— 124.11  
— 123.86  
— 120.79  
— 115.00  
— 114.40  
— 111.48  
— 111.43

— 55.73  
— 55.45

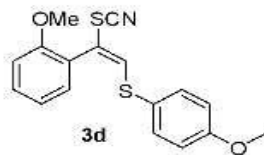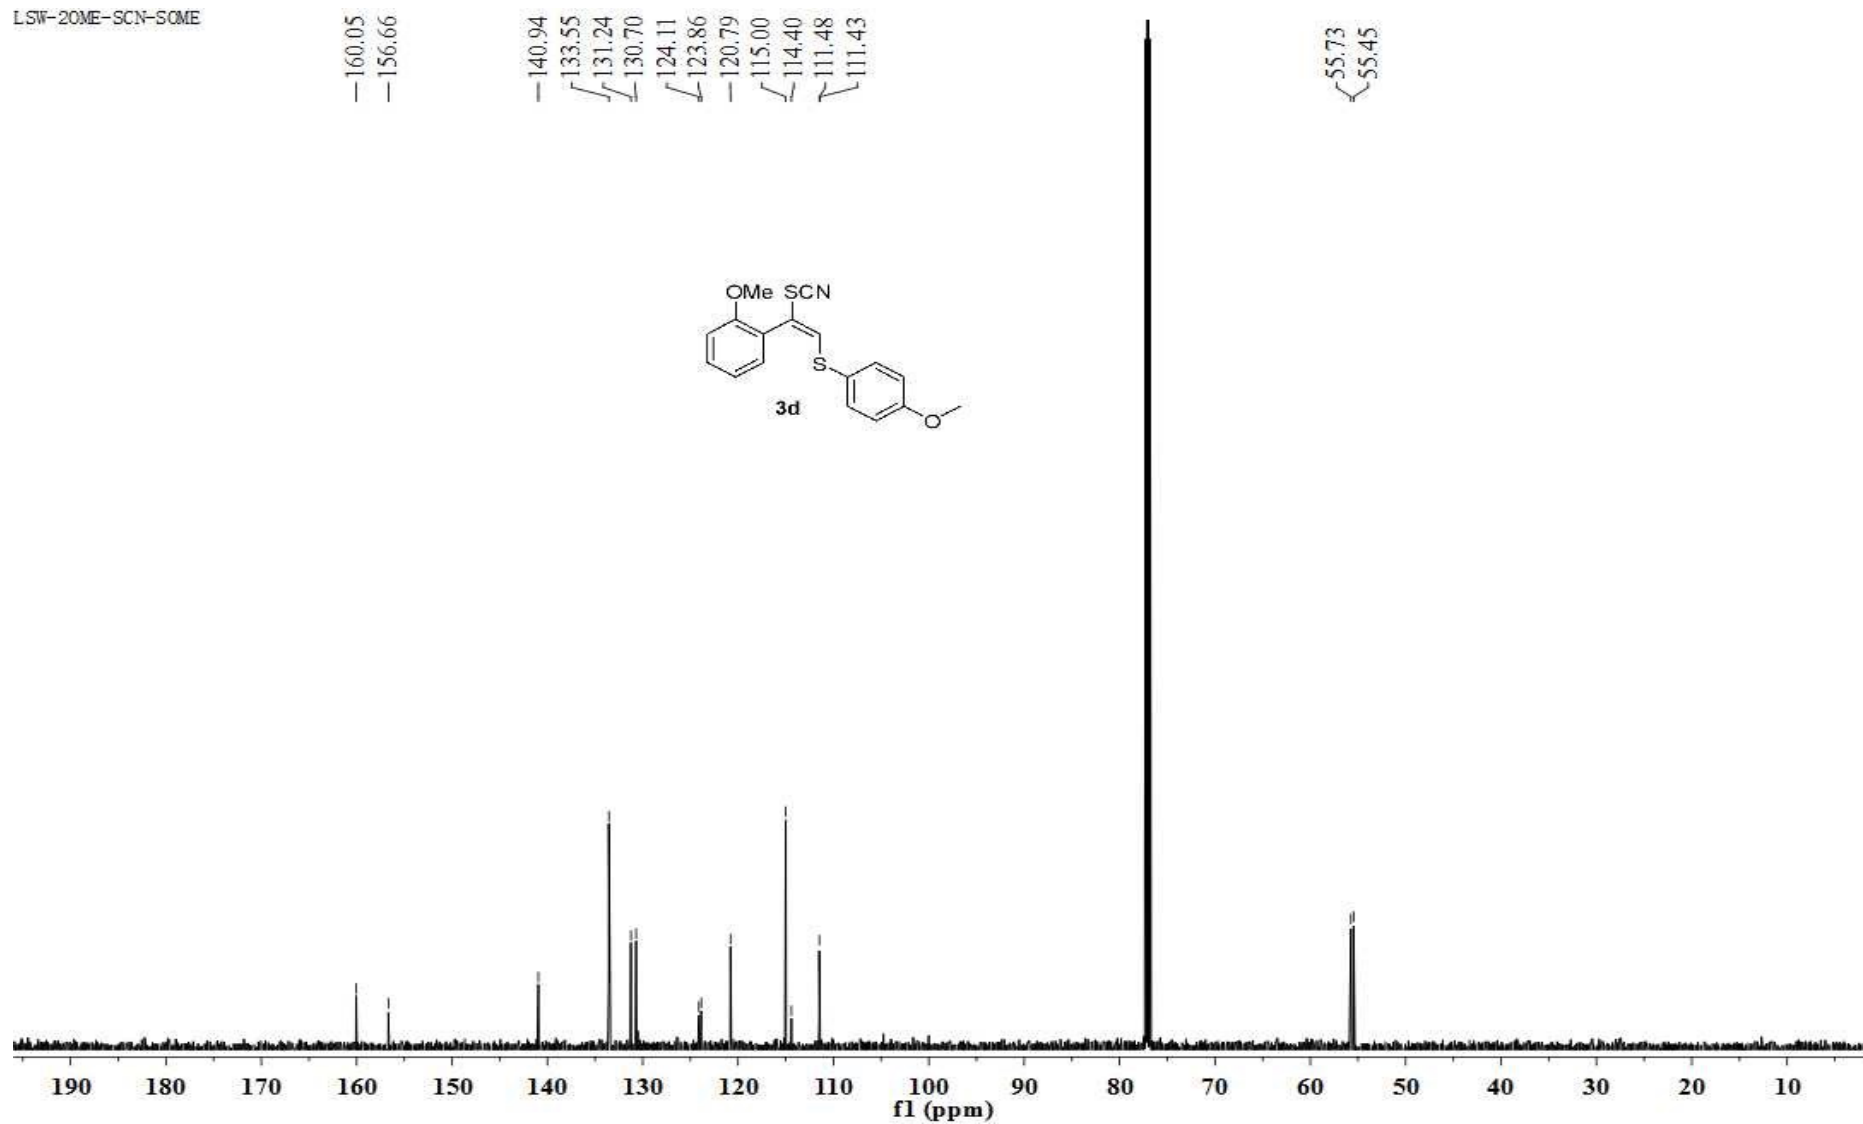

9. <sup>1</sup>H NMR of **3e** (600 MHz, CDCl<sub>3</sub>)

LSW-BIANCHUN-SCN-SOME

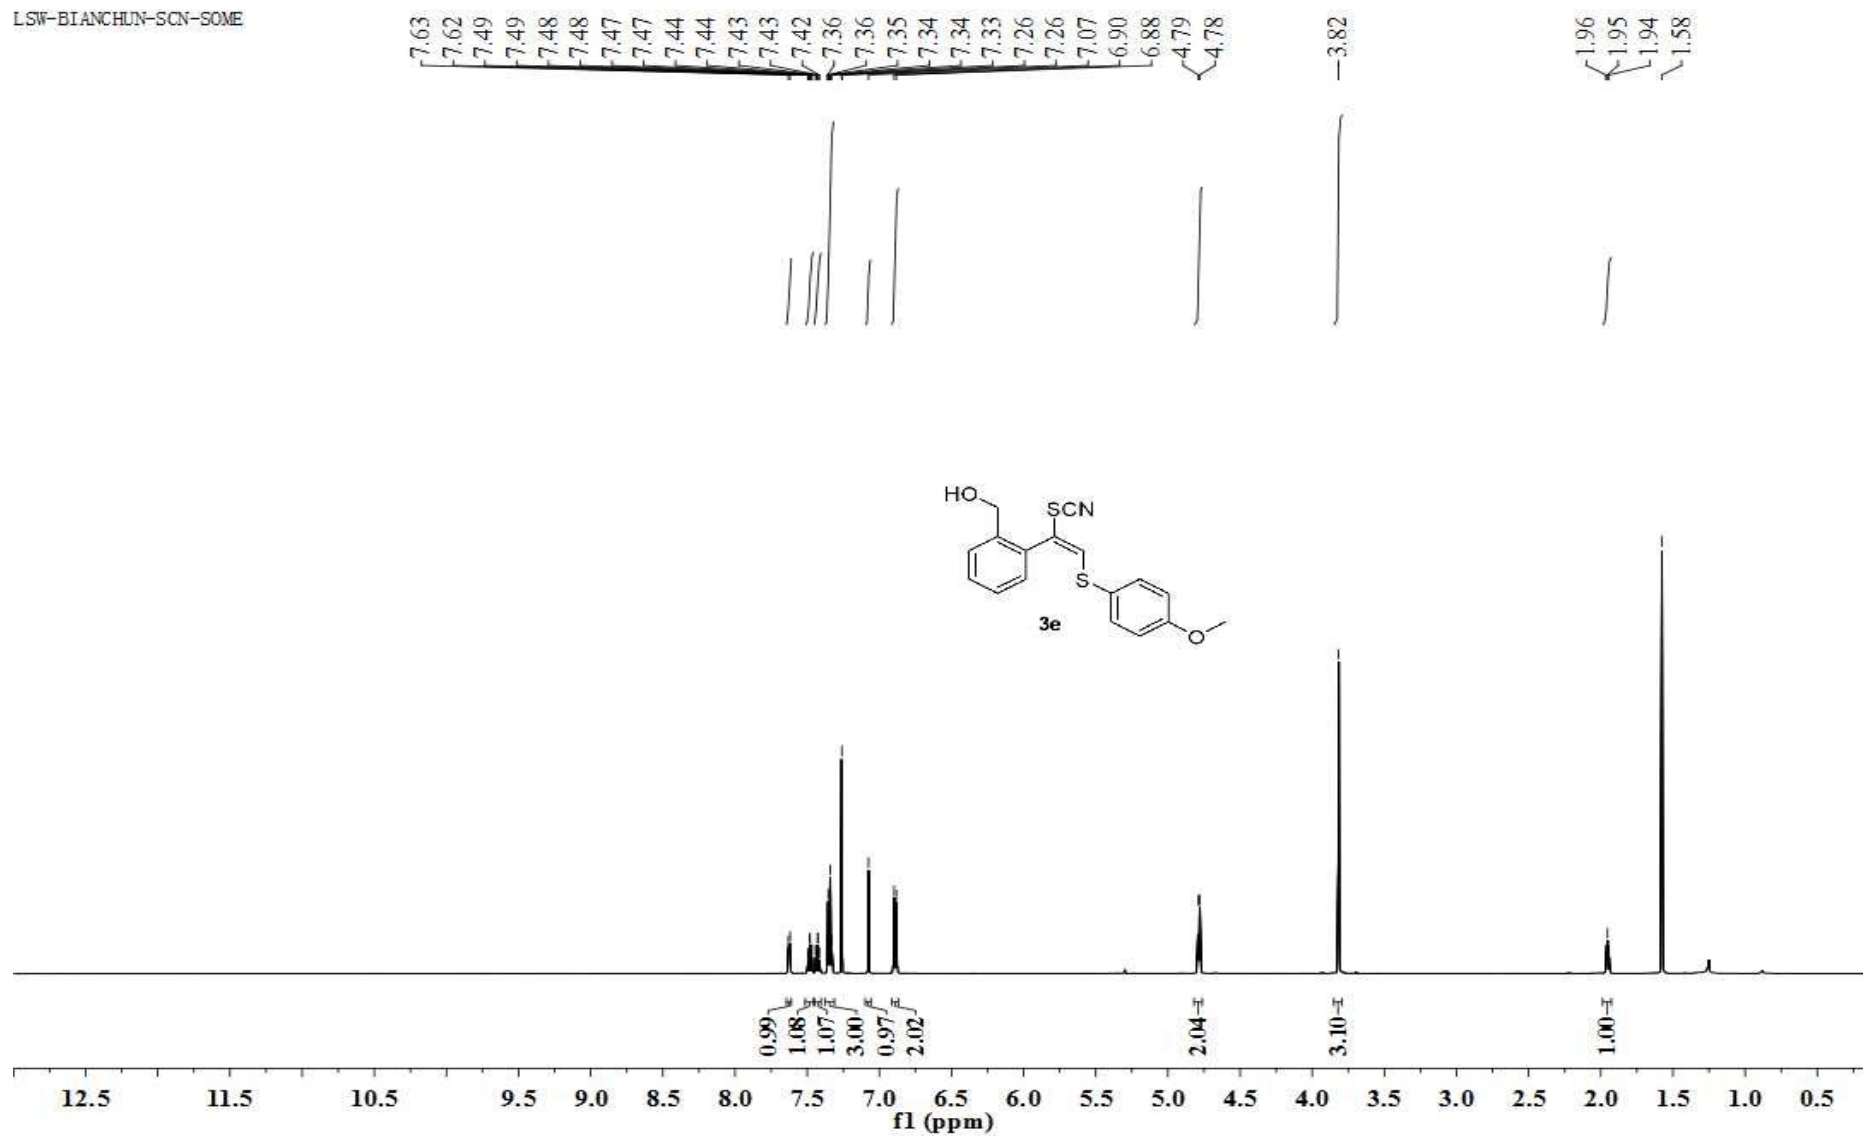

10. <sup>13</sup>C NMR of **3e** (125 MHz, CDCl<sub>3</sub>)

LSW-BIANCHUN-SCN-SOME

160.34  
140.39  
139.18  
133.76  
133.25  
130.29  
129.82  
128.92  
128.70  
123.07  
115.18  
115.11  
110.34

62.88  
55.48

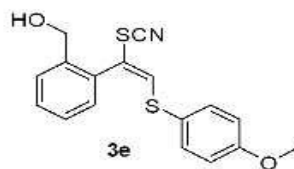

4.

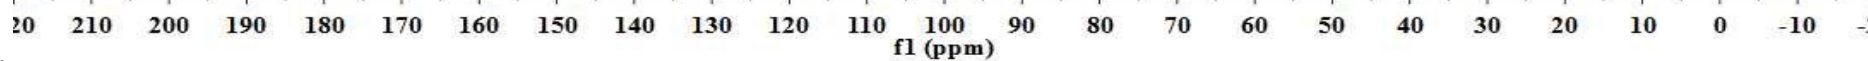

11.  $^1\text{H}$  NMR of **3f** (600 MHz,  $\text{CDCl}_3$ )



LSW-30ME-SCN-S-OME

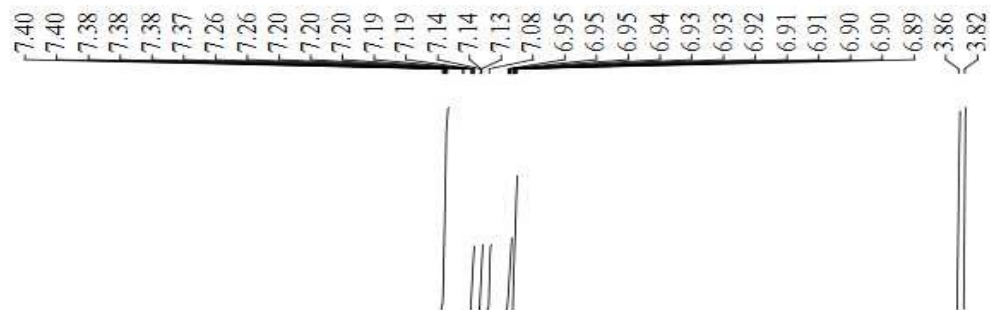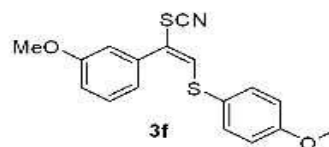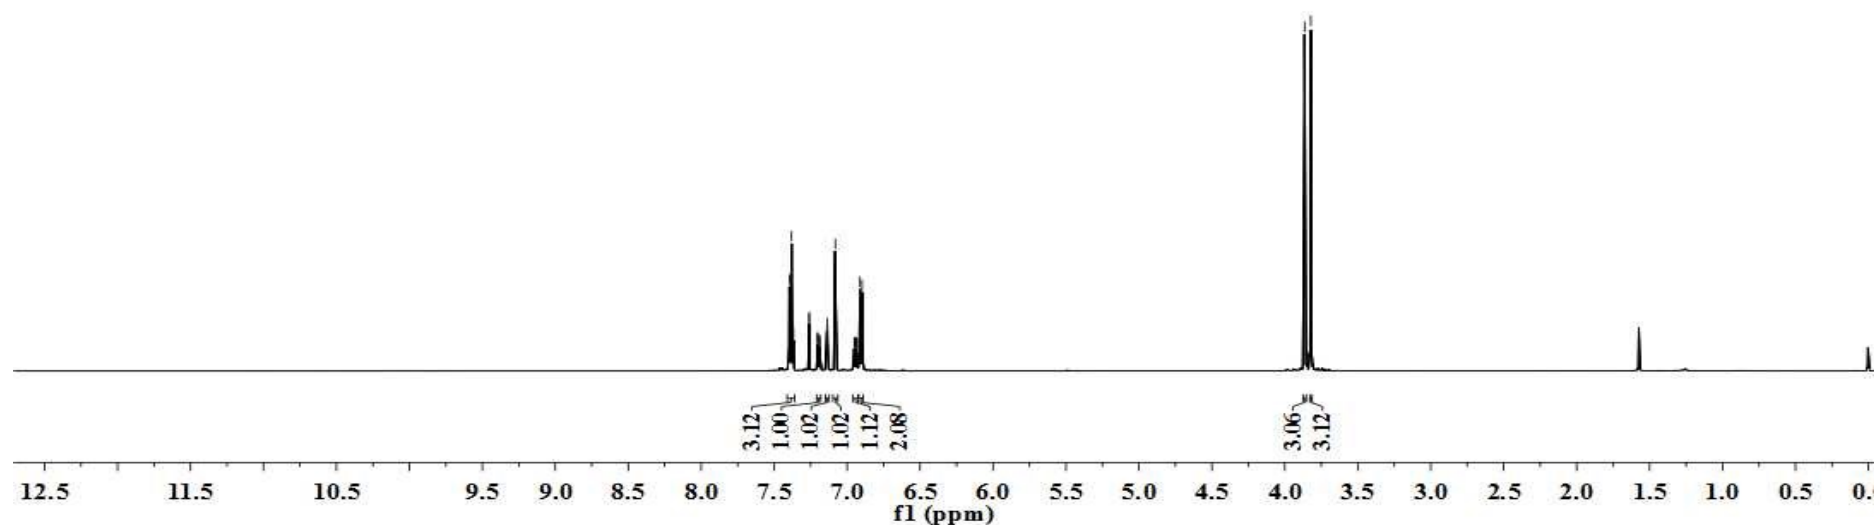

5. |2. 13C NMR of 3a (125 MHz, CDCl3)

LSW-3OME-SCN-S-OME

160.30  
159.73

139.54  
136.15  
133.74  
129.93  
124.19  
121.21  
116.33  
115.25  
115.14  
114.21  
110.63

55.49  
55.43

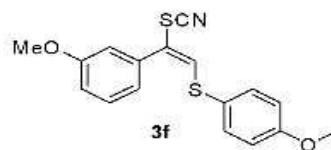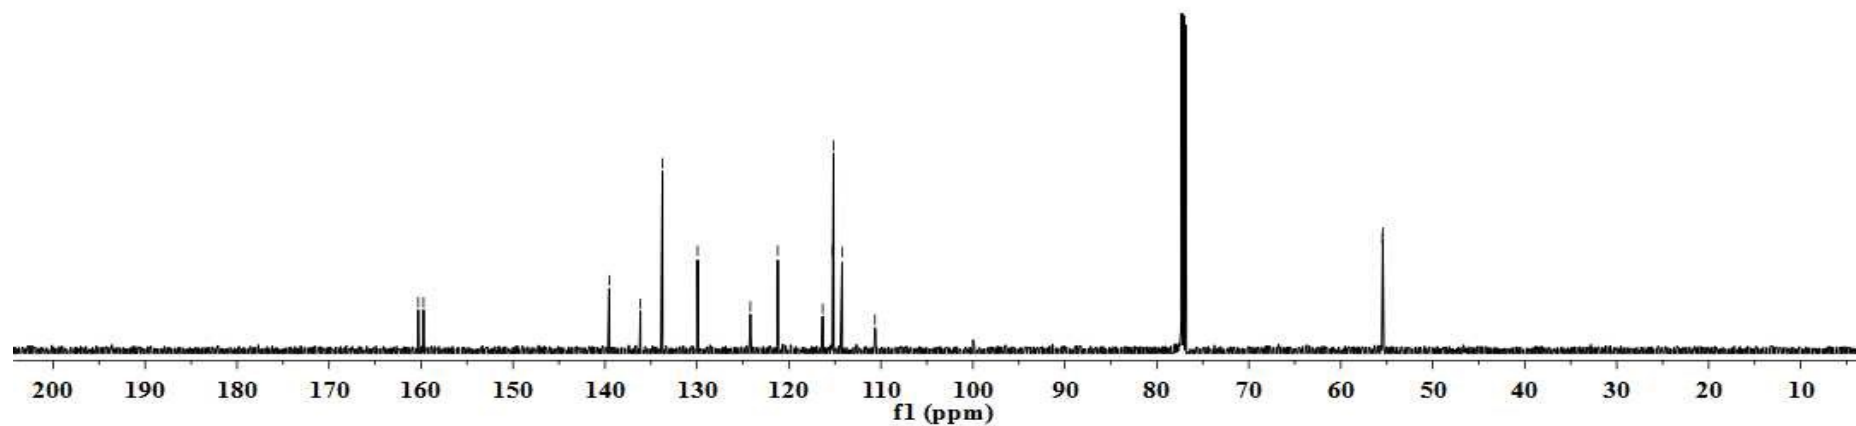

[13. <sup>1</sup>H NMR of **3g** (600 MHz, CDCl<sub>3</sub>)

LSW-30H-SCN-SOME

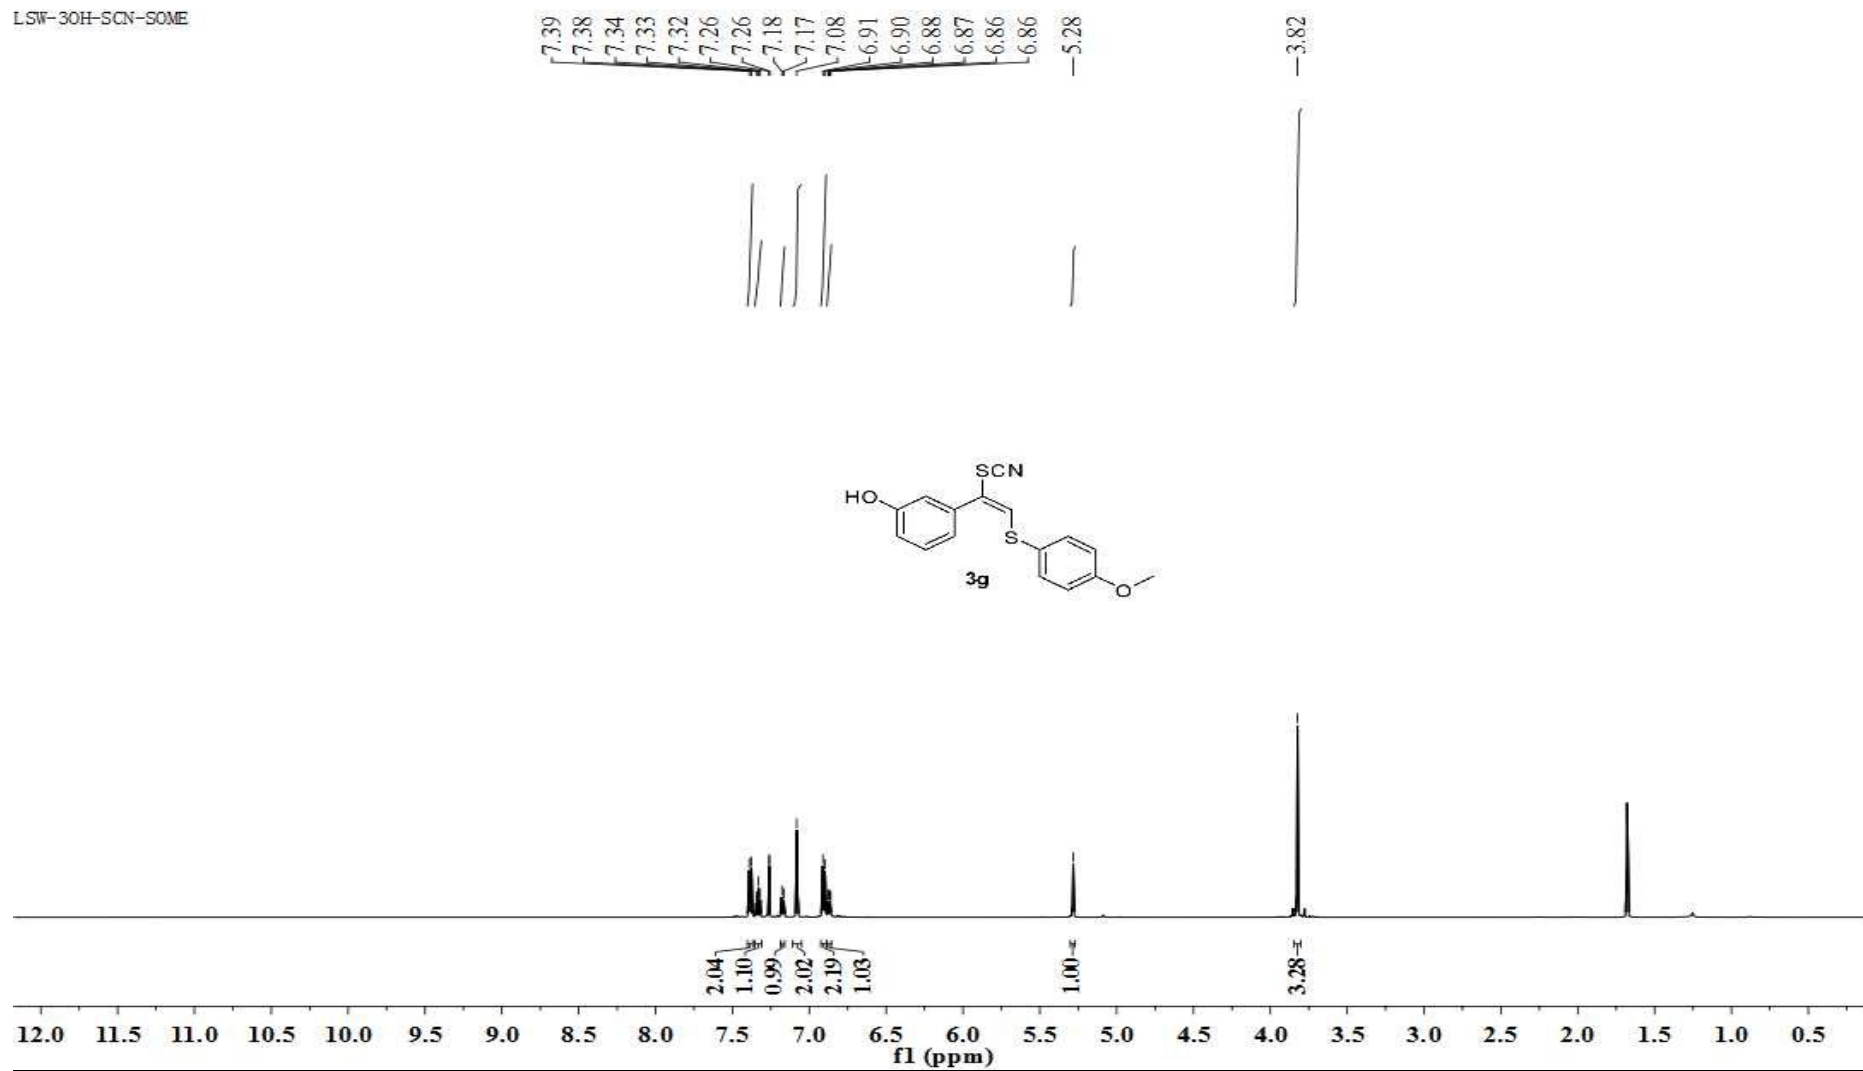

14. <sup>13</sup>C NMR of **3g** (125 MHz, CDCl<sub>3</sub>)

LSW-30H-SCN-SOME

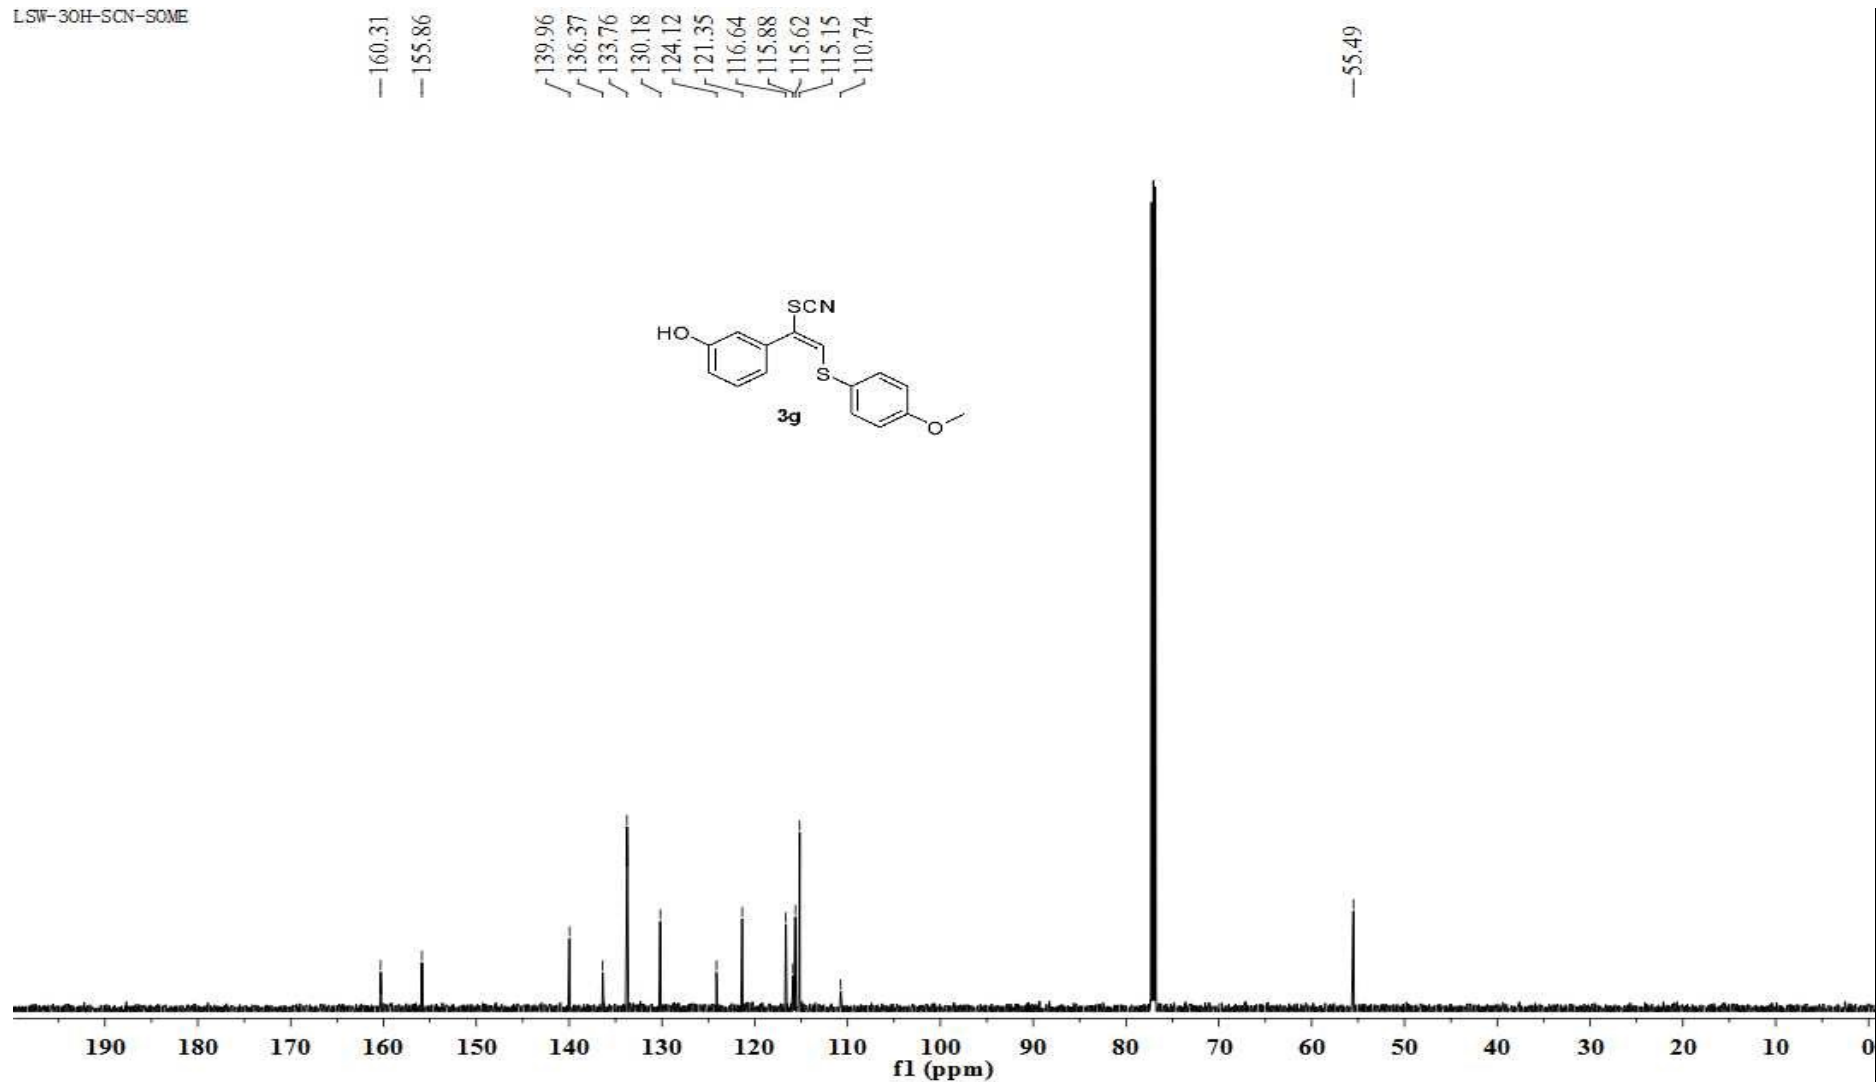

15. <sup>1</sup>H NMR of **3h** (600 MHz, CDCl<sub>3</sub>)

LSW-3-CN-SCN-SOME

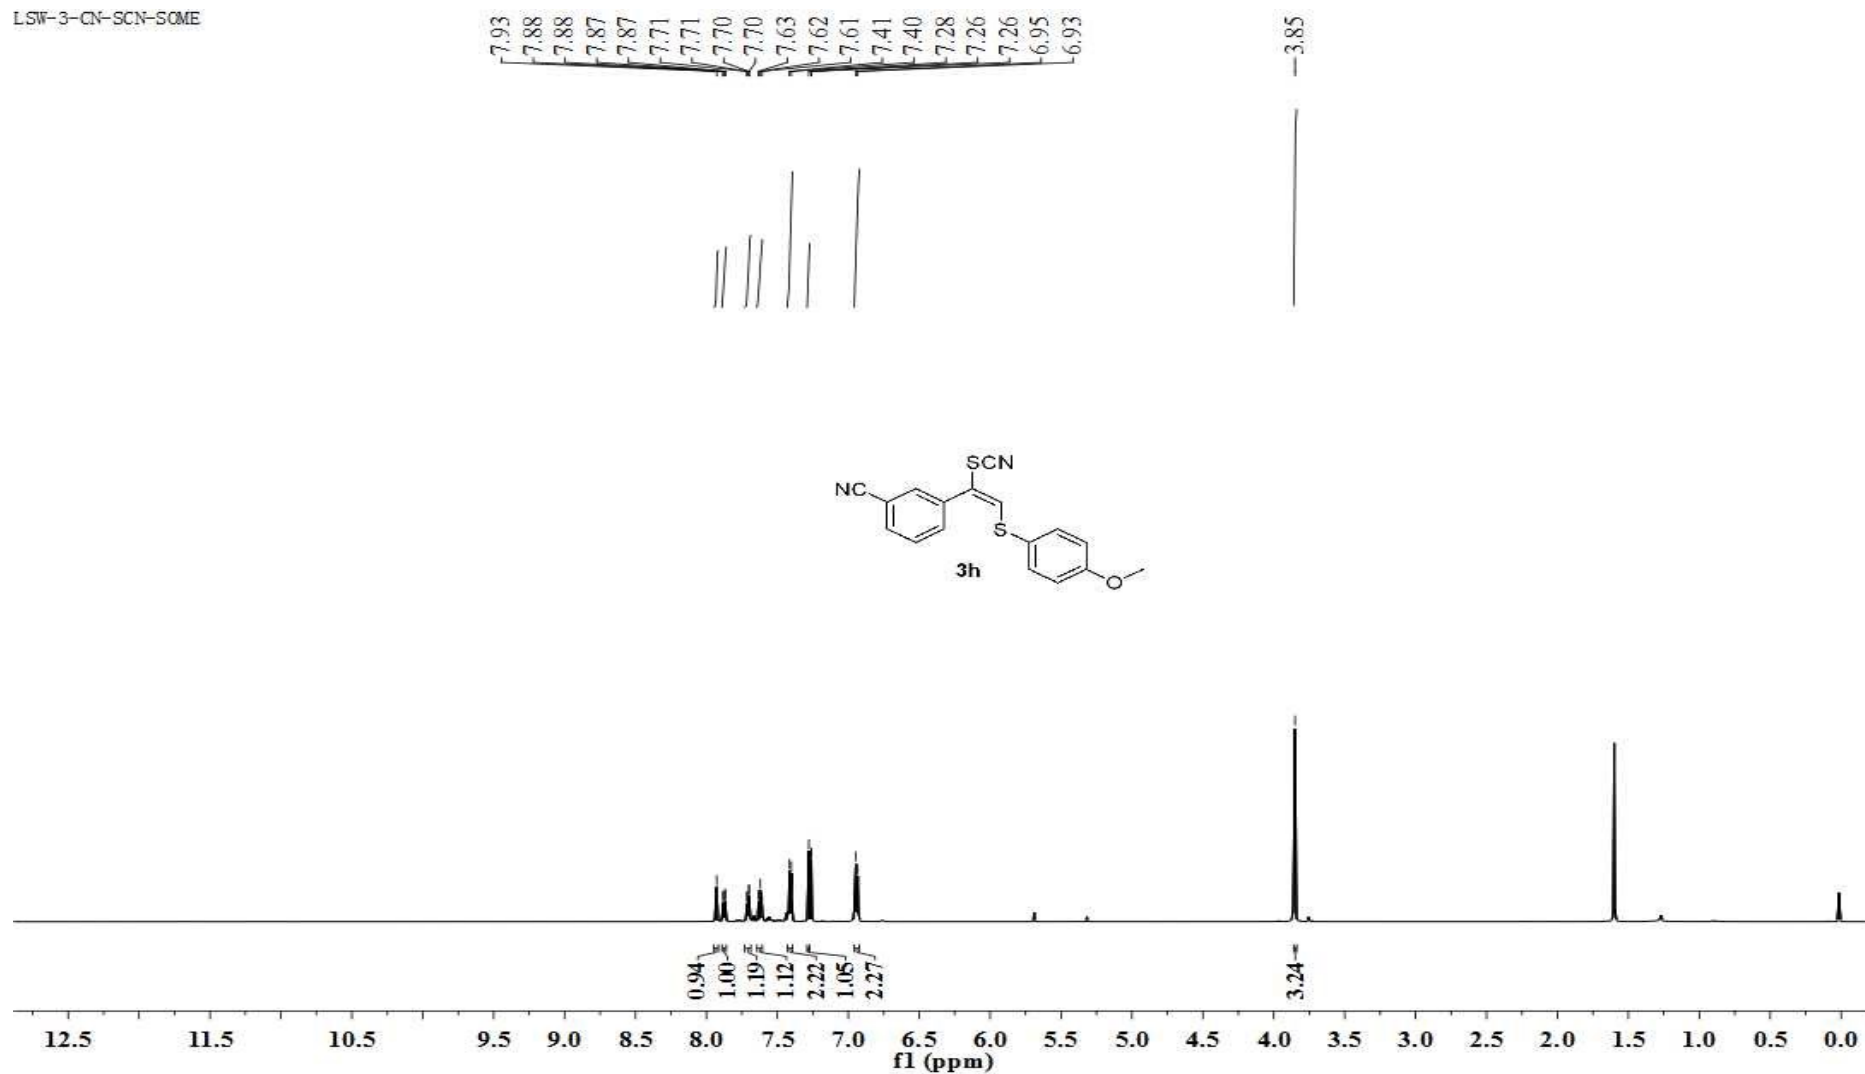

16. <sup>13</sup>C NMR of **3a** (125 MHz, CDCl<sub>3</sub>)

LSW-3CN-SCN-SOME

—160.66

—143.47

134.02

132.63

132.40

129.82

122.96

118.12

115.32

113.62

113.34

109.91

—55.52

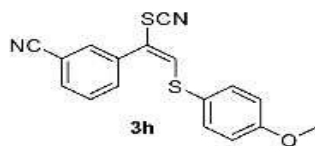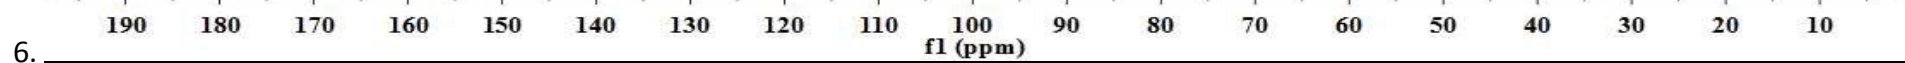

6.

17. <sup>1</sup>H NMR of **3i** (600 MHz, CDCl<sub>3</sub>)

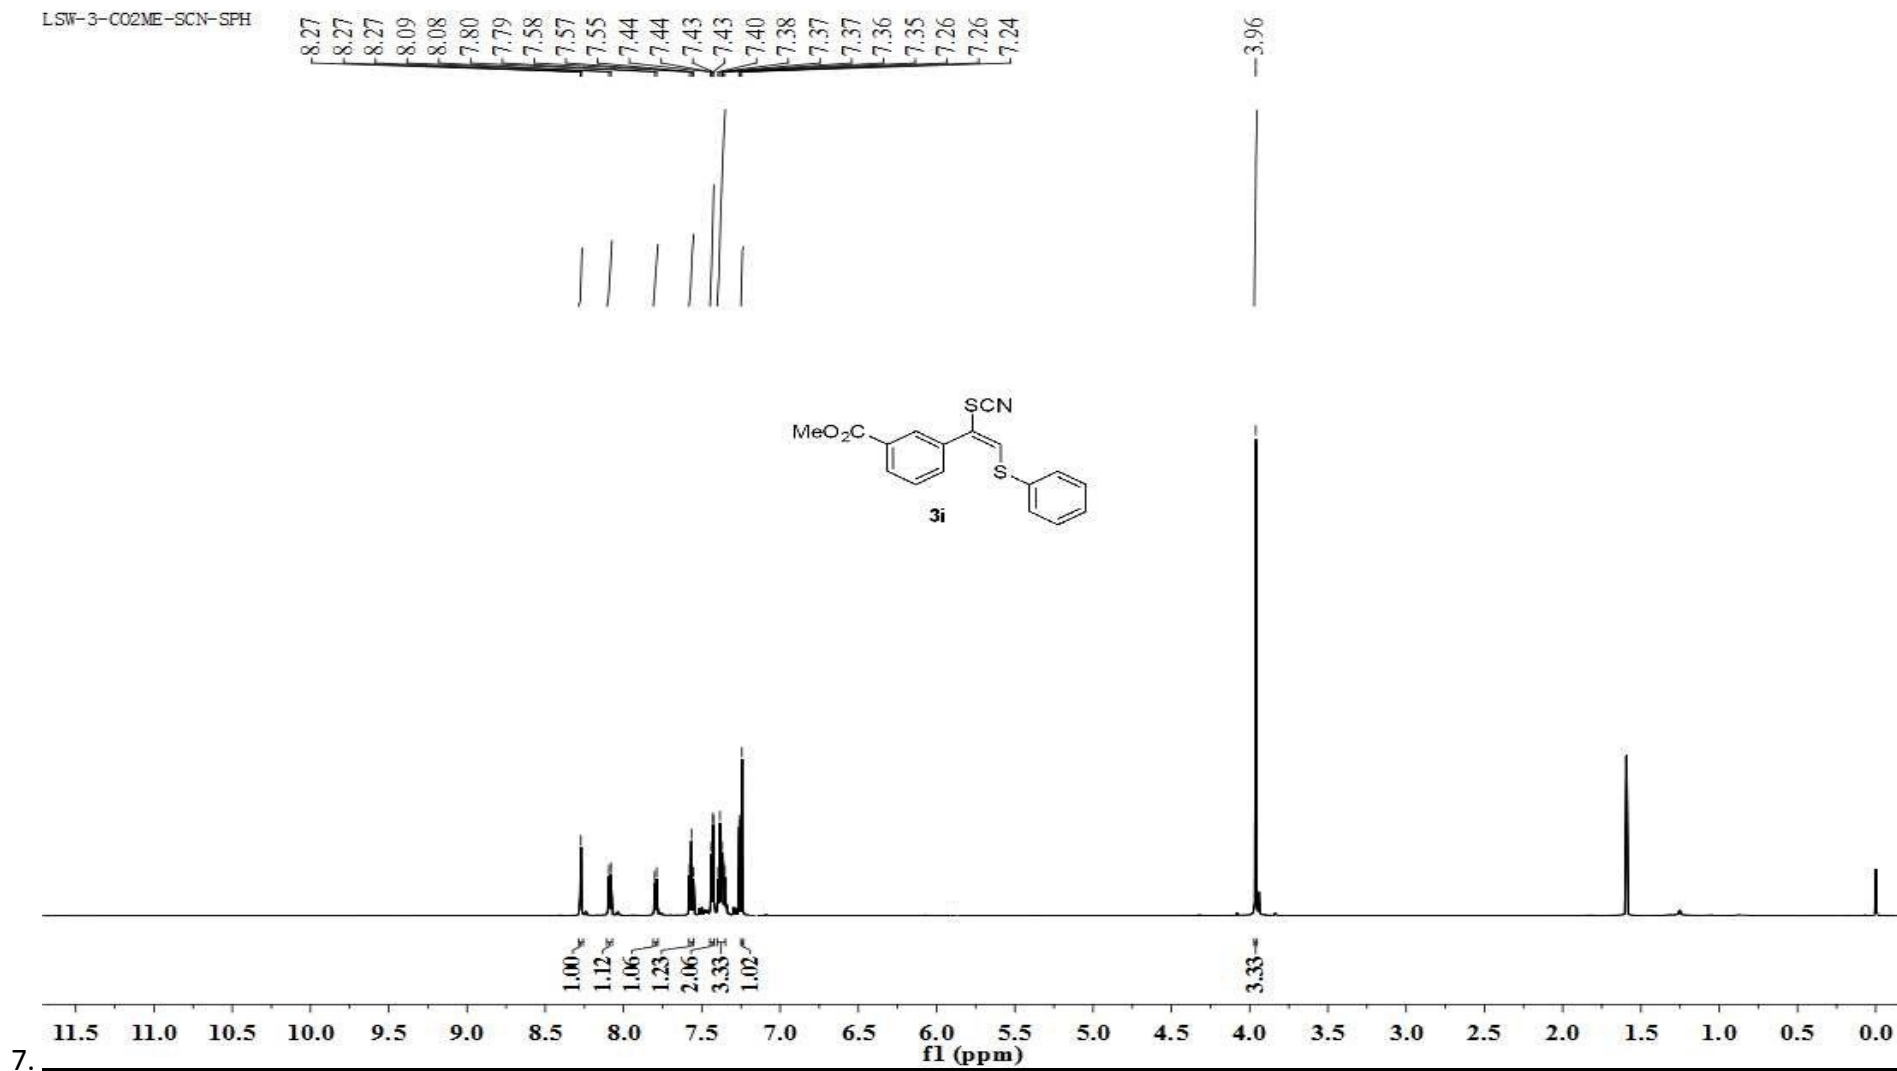

18.  $^{13}\text{C}$  NMR of **3i** (125 MHz,  $\text{CDCl}_3$ )

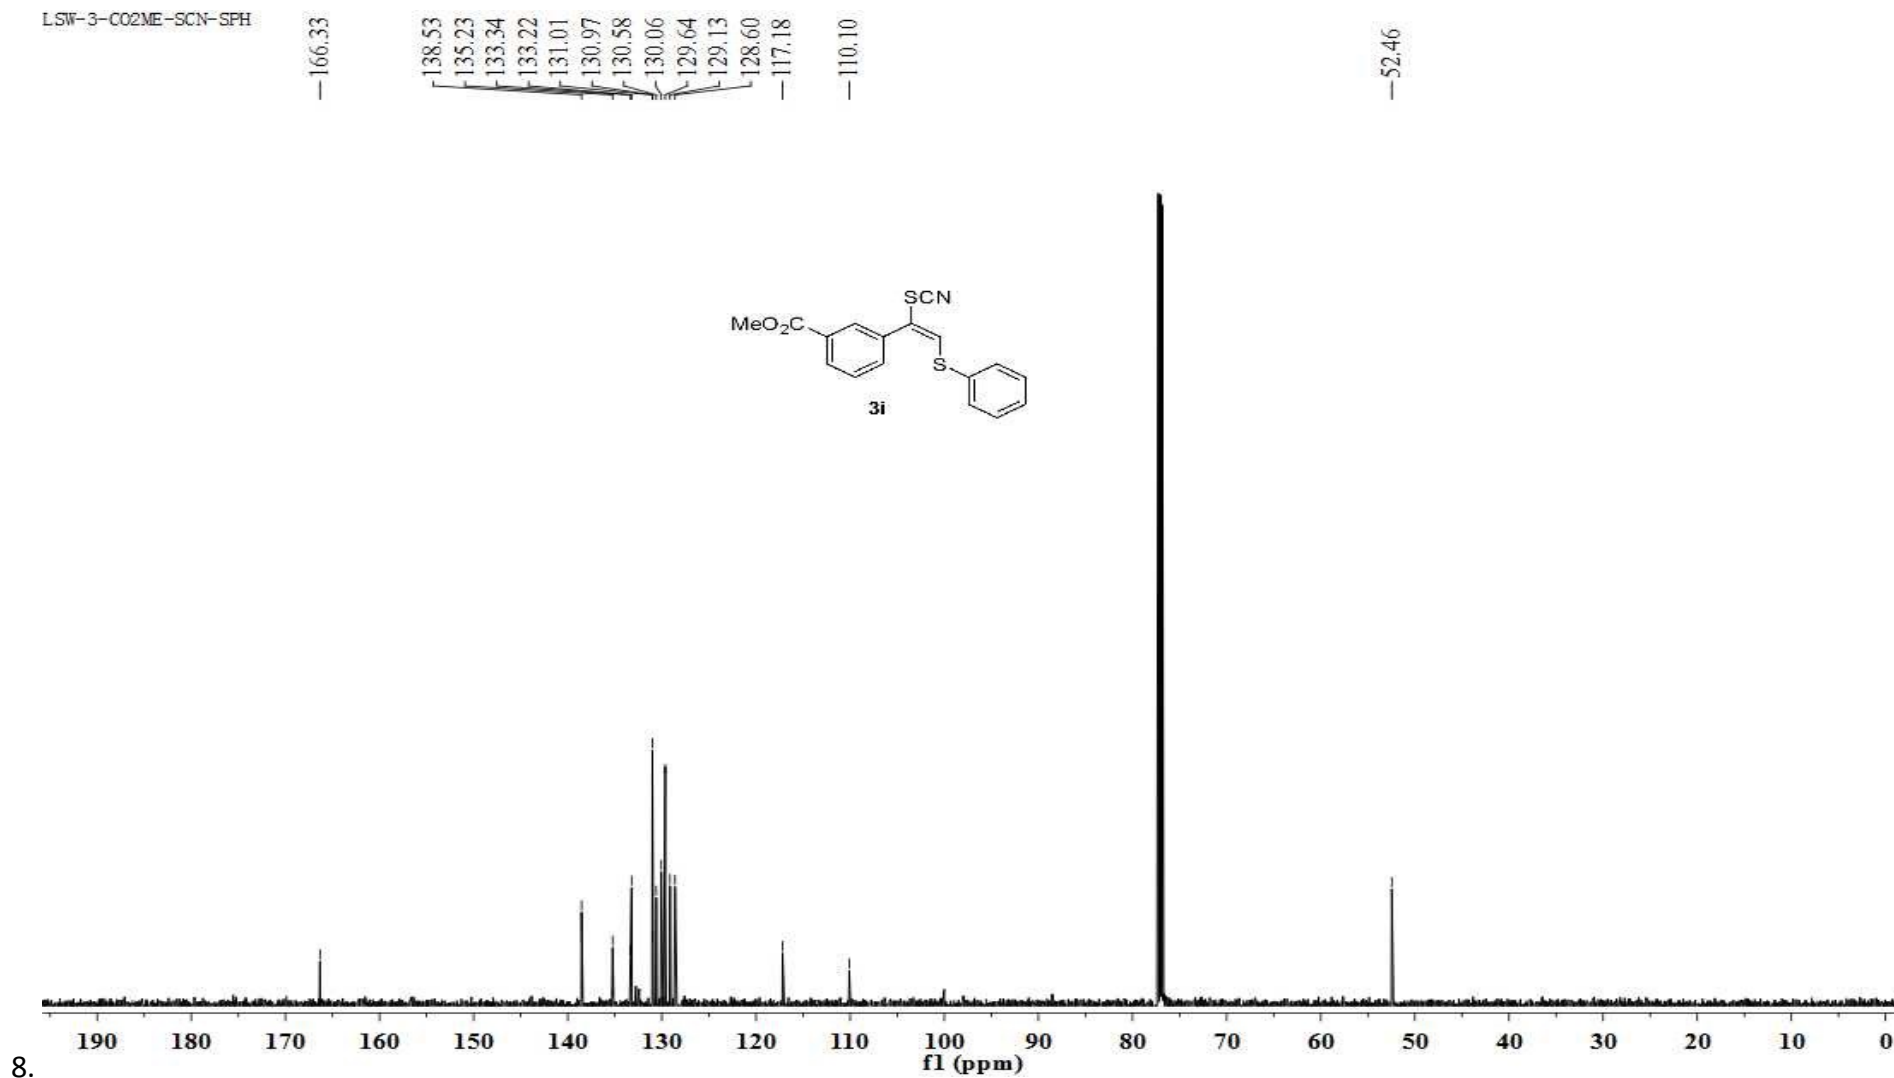

8.

19. <sup>1</sup>H NMR of **3j** (600 MHz, CDCl<sub>3</sub>)



LSW-3L-SCN-SOME

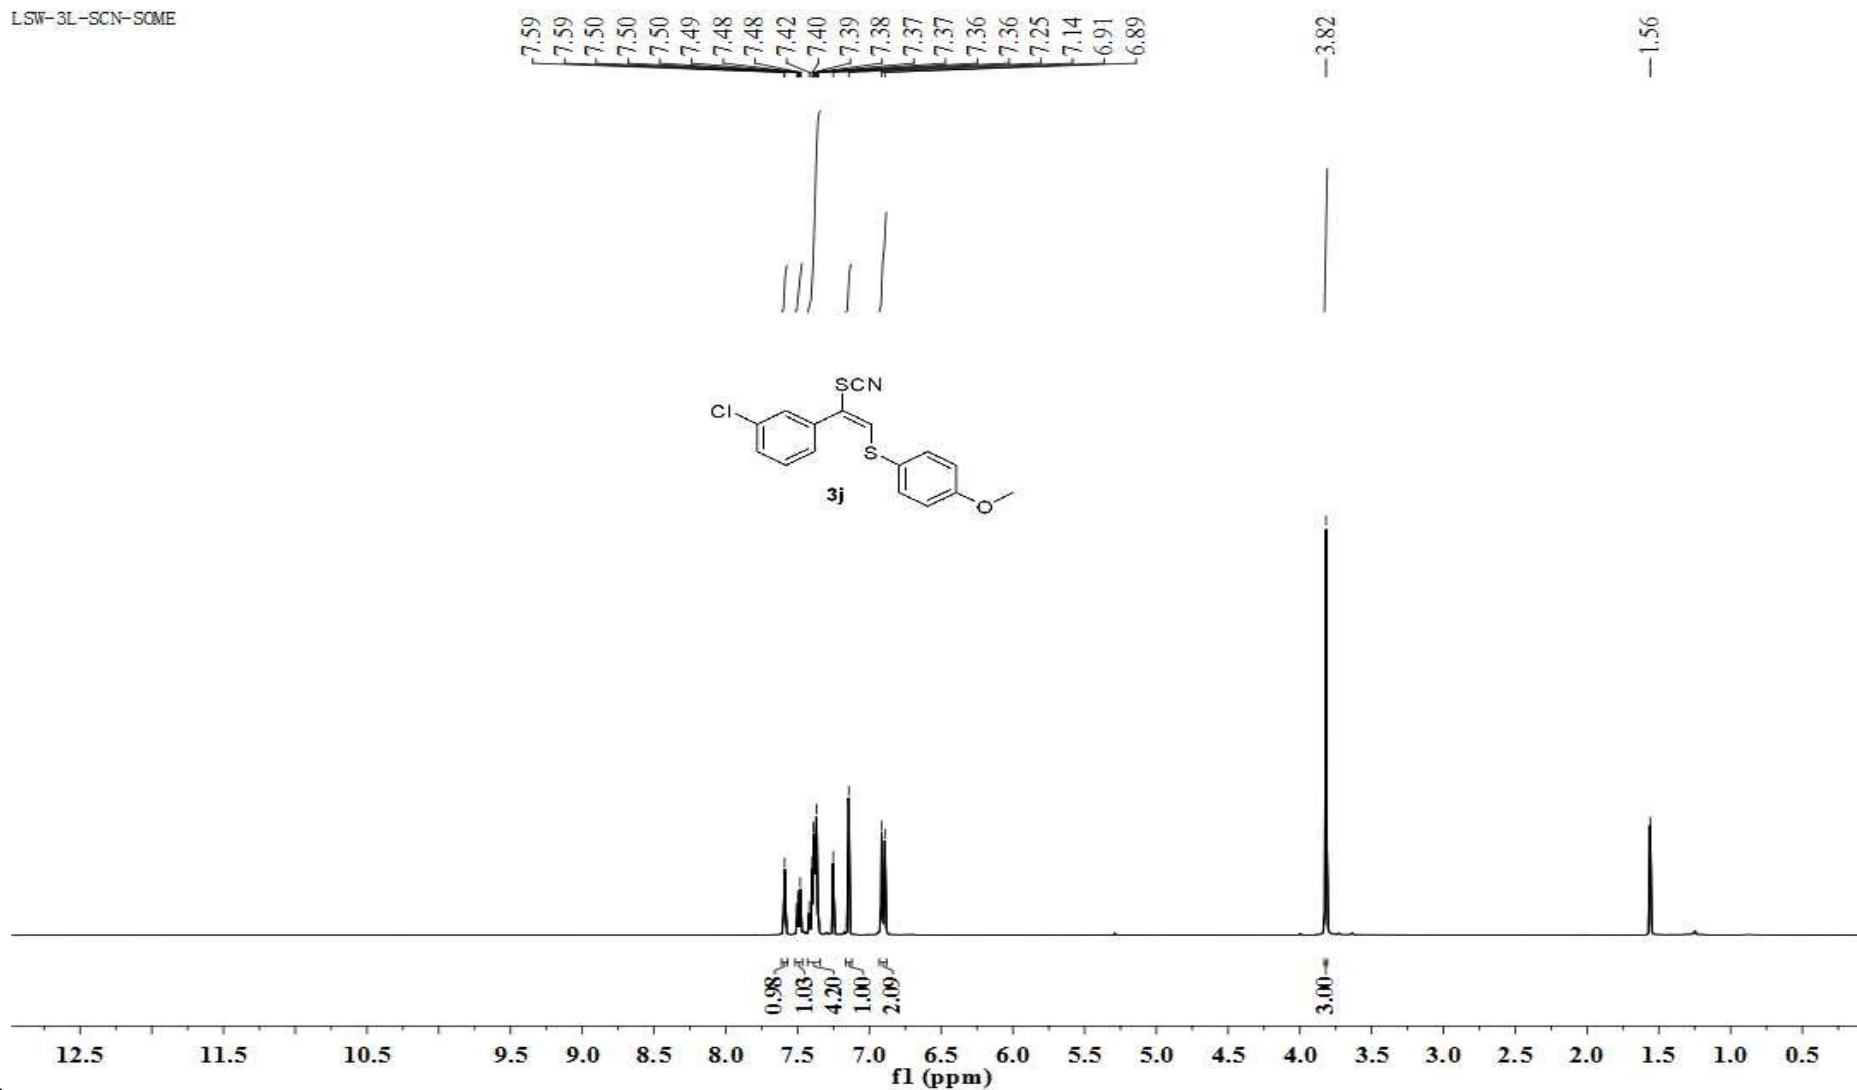

9. <sup>13</sup>C NMR of **3j** (125 MHz, CDCl<sub>3</sub>)

LSW-3CL-SCN-SOME

—160.46

141.61  
136.71  
134.85  
133.89  
130.14  
129.53  
128.84  
127.10  
123.61  
115.22  
114.77  
110.27

—55.50

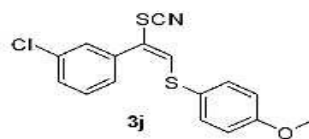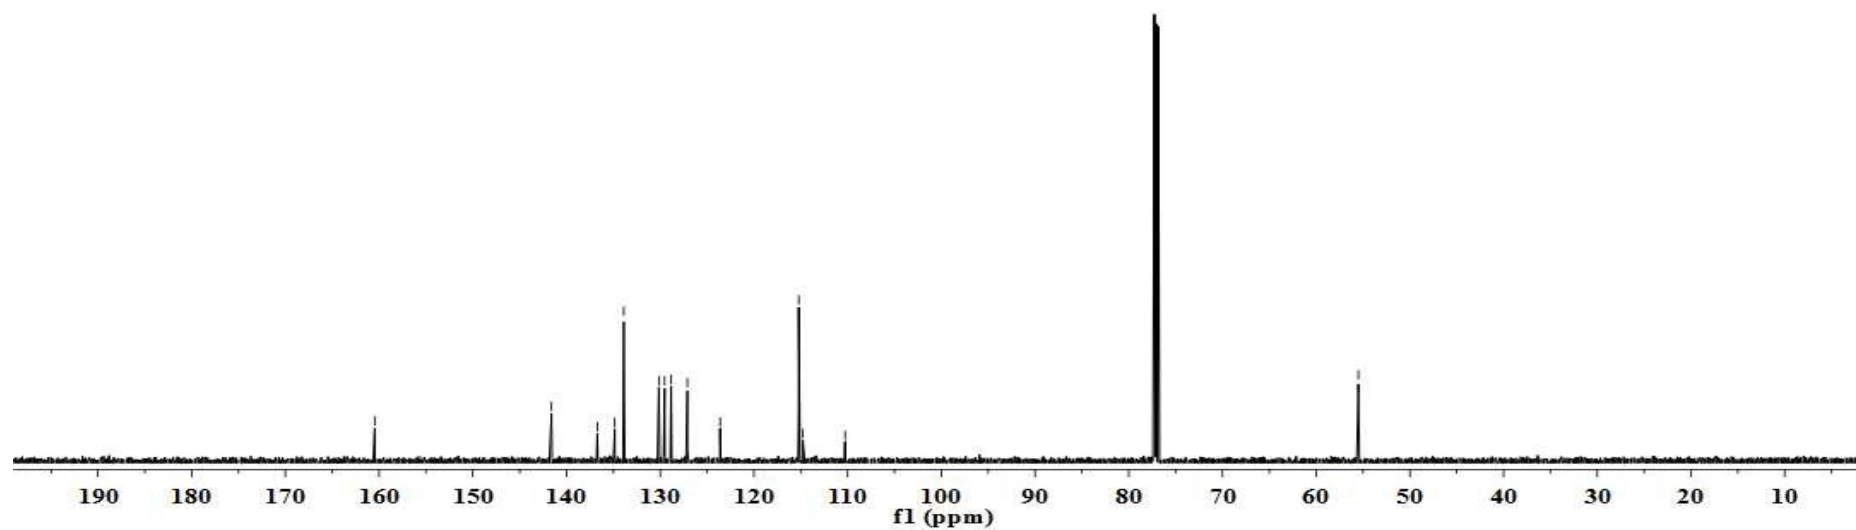

21.  $^1\text{H}$  NMR of **3k** (600 MHz,  $\text{CDCl}_3$ )

LSW-4F-SCN-SPOME

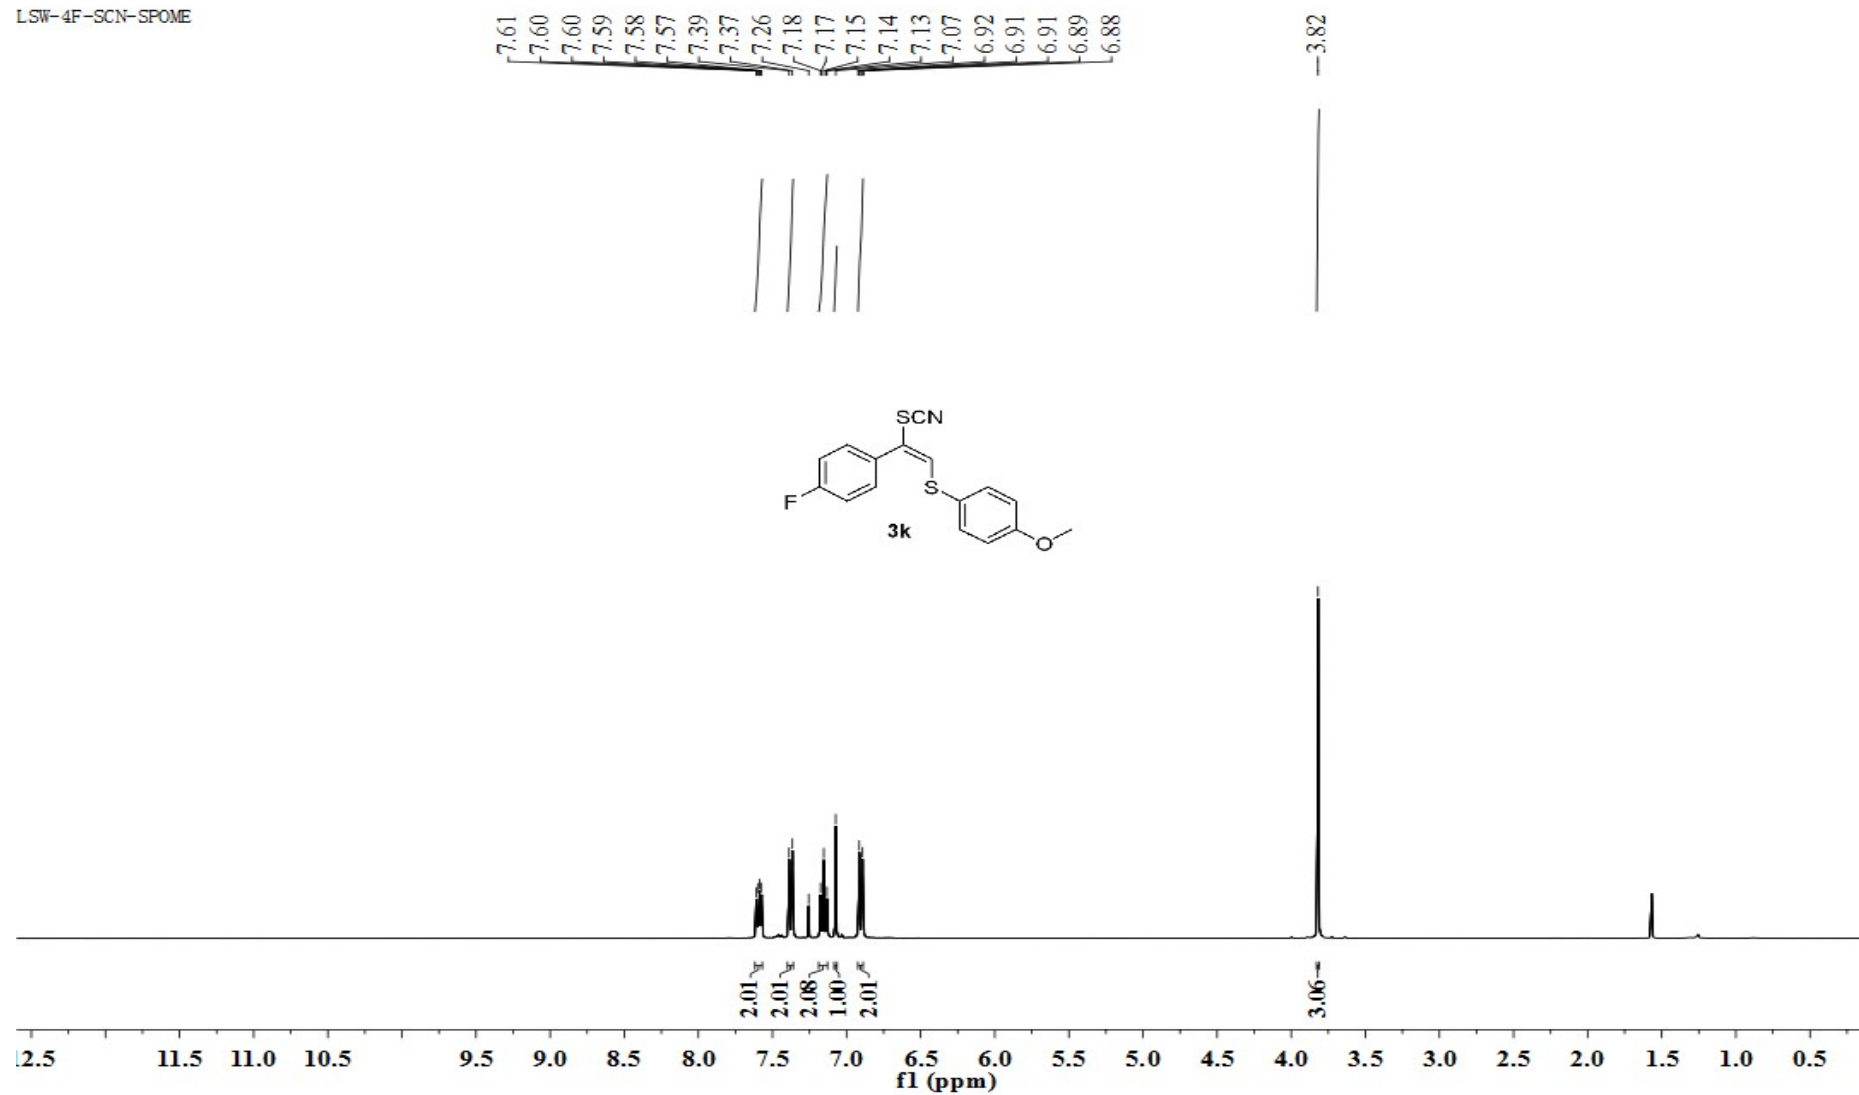

22.  $^{13}\text{C}$  NMR of **3k** (125 MHz,  $\text{CDCl}_3$ )

LSW-4F-SCN-SOME

163.72  
162.06  
160.38

139.75  
133.78  
130.99  
130.93

123.78  
116.11  
115.96  
115.58  
115.19  
110.43

55.49

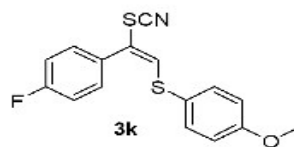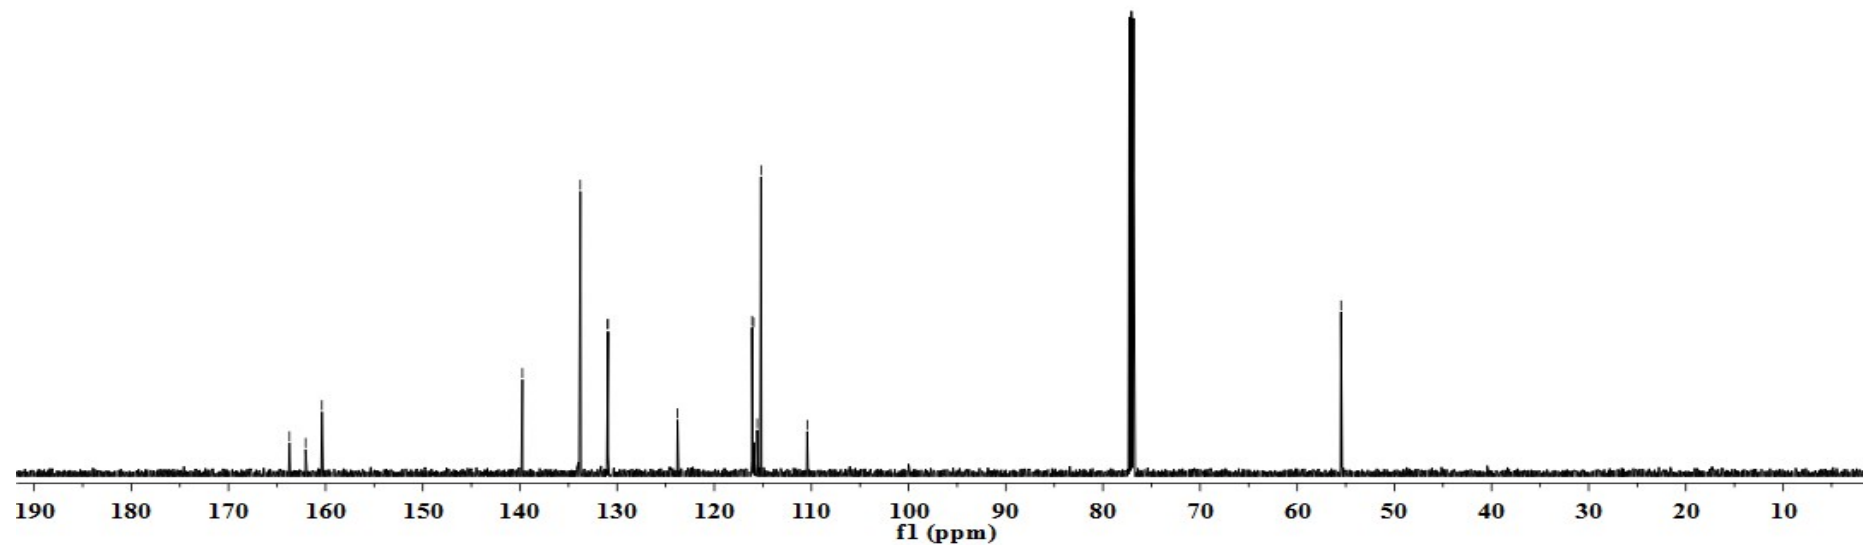

$^{19}\text{F}$  NMR of **3k** (600 MHz,  $\text{CDCl}_3$ )

LSW-4F-SCN-SPOME

-110.35  
-110.36  
-110.37  
-110.39  
-110.39

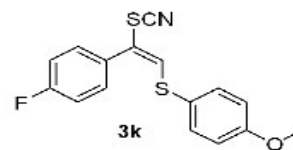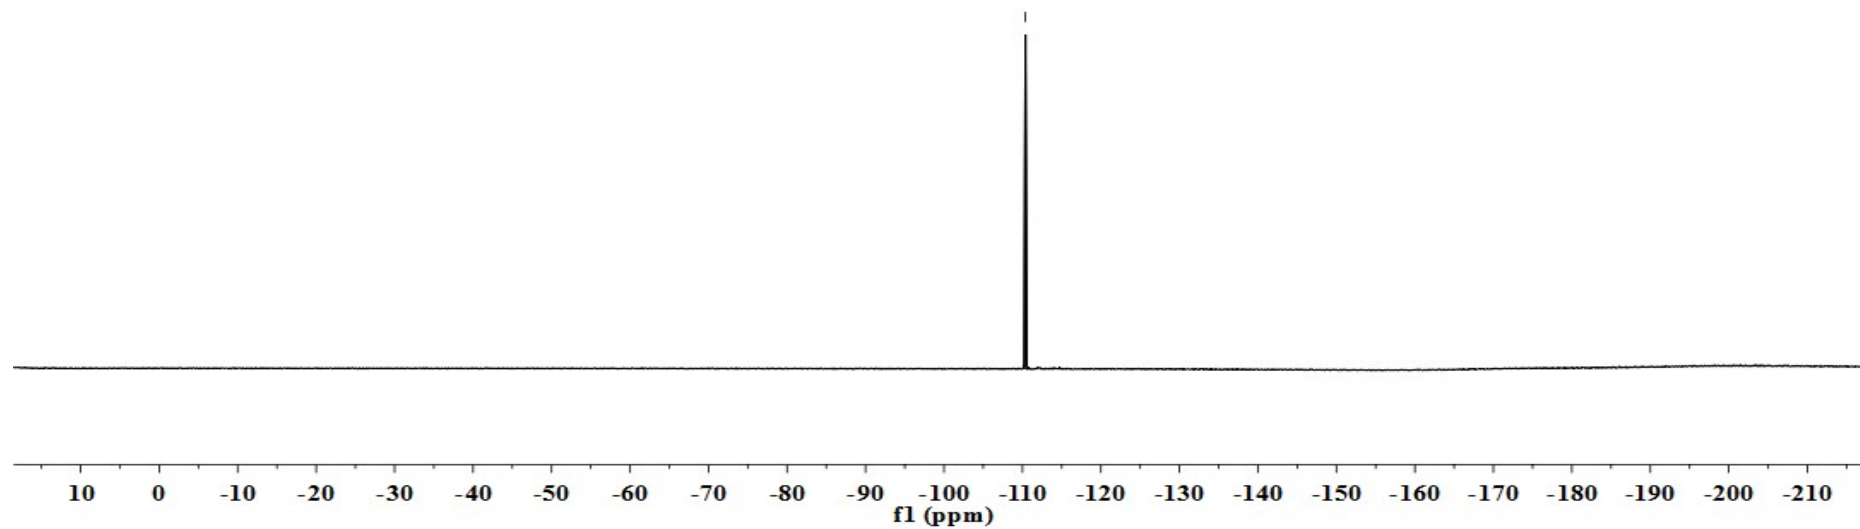

24. <sup>1</sup>H NMR of **31** (600 MHz, CDCl<sub>3</sub>)

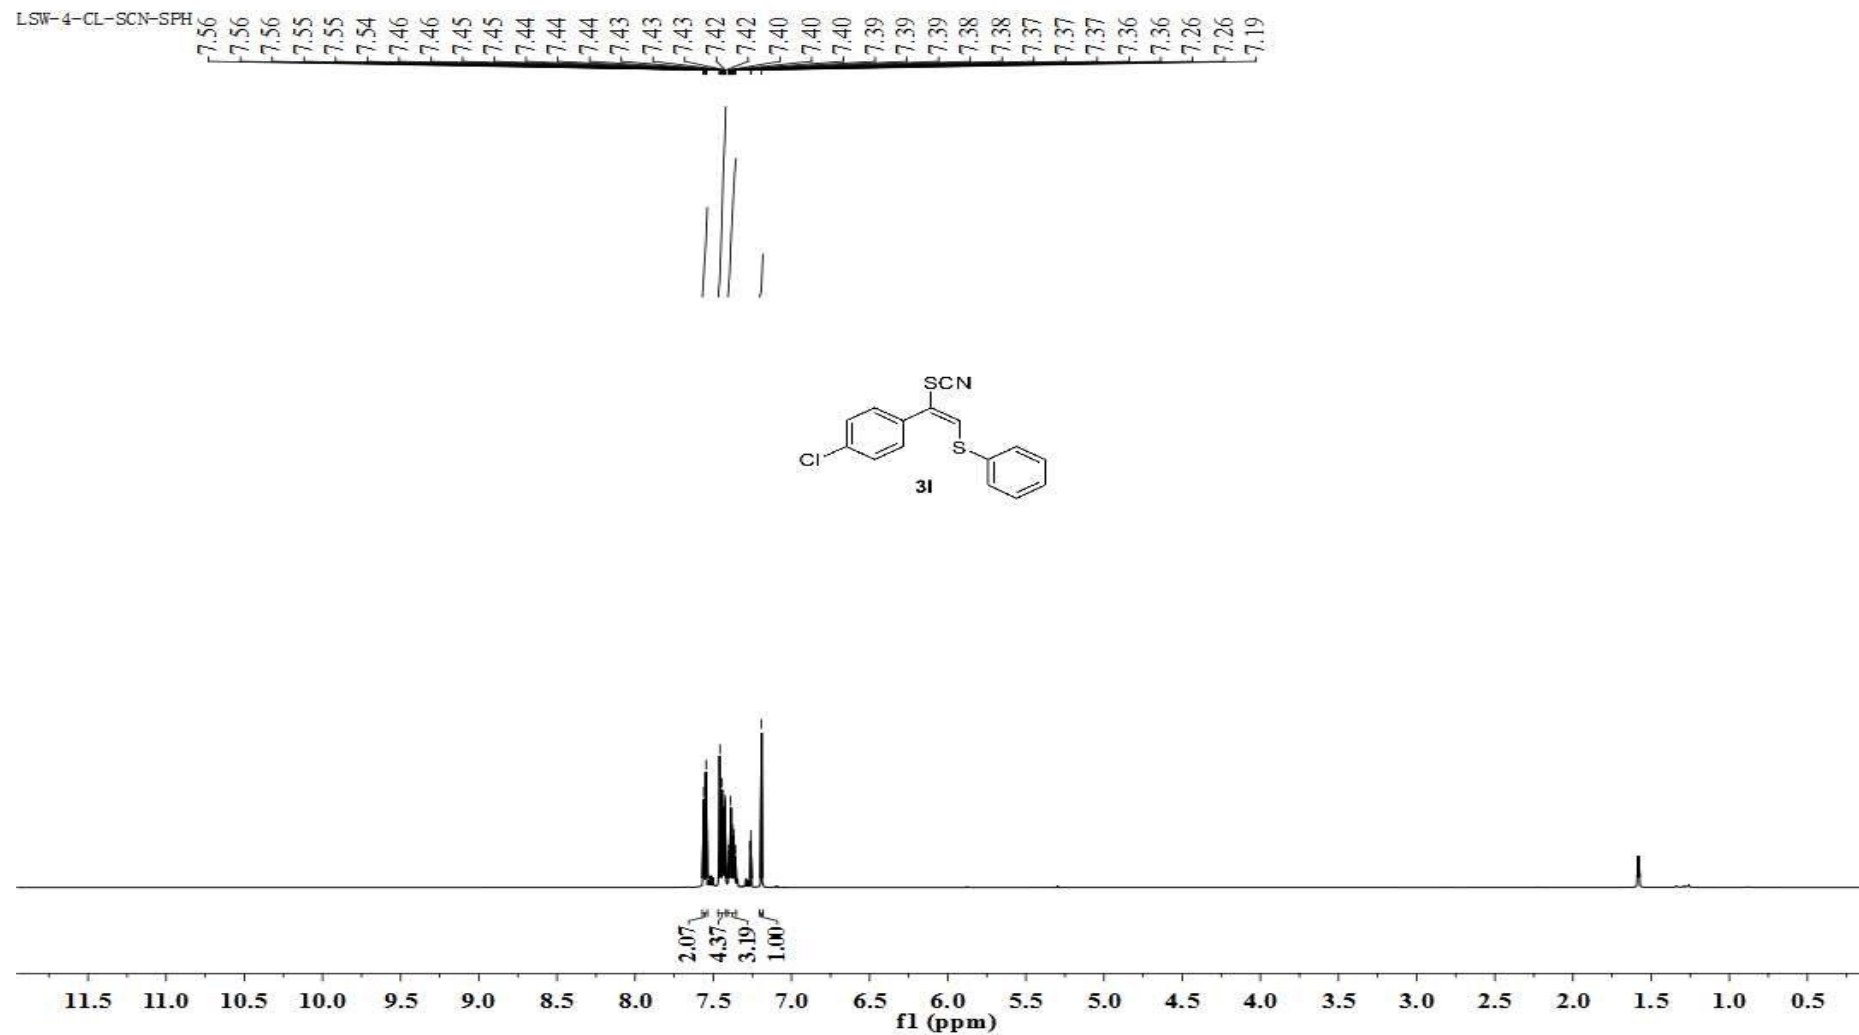

25.  $^{13}\text{C}$  NMR of **31** (125 MHz,  $\text{CDCl}_3$ )

LSW-4-CL-SCN-SPH

137.97  
135.50  
133.36  
133.24  
130.98  
130.27  
129.66  
129.22  
128.61  
117.15  
110.16

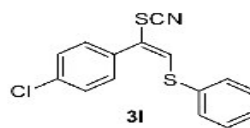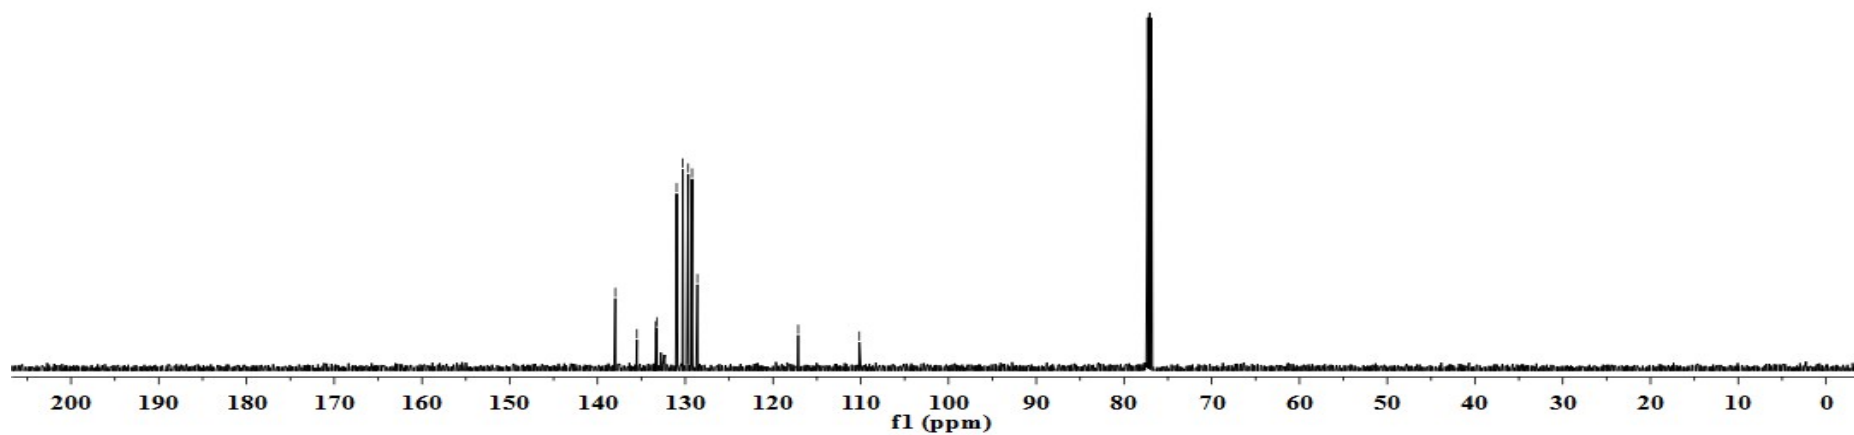

26.  $^1\text{H}$  NMR of **3m** (600 MHz,  $\text{CDCl}_3$ )

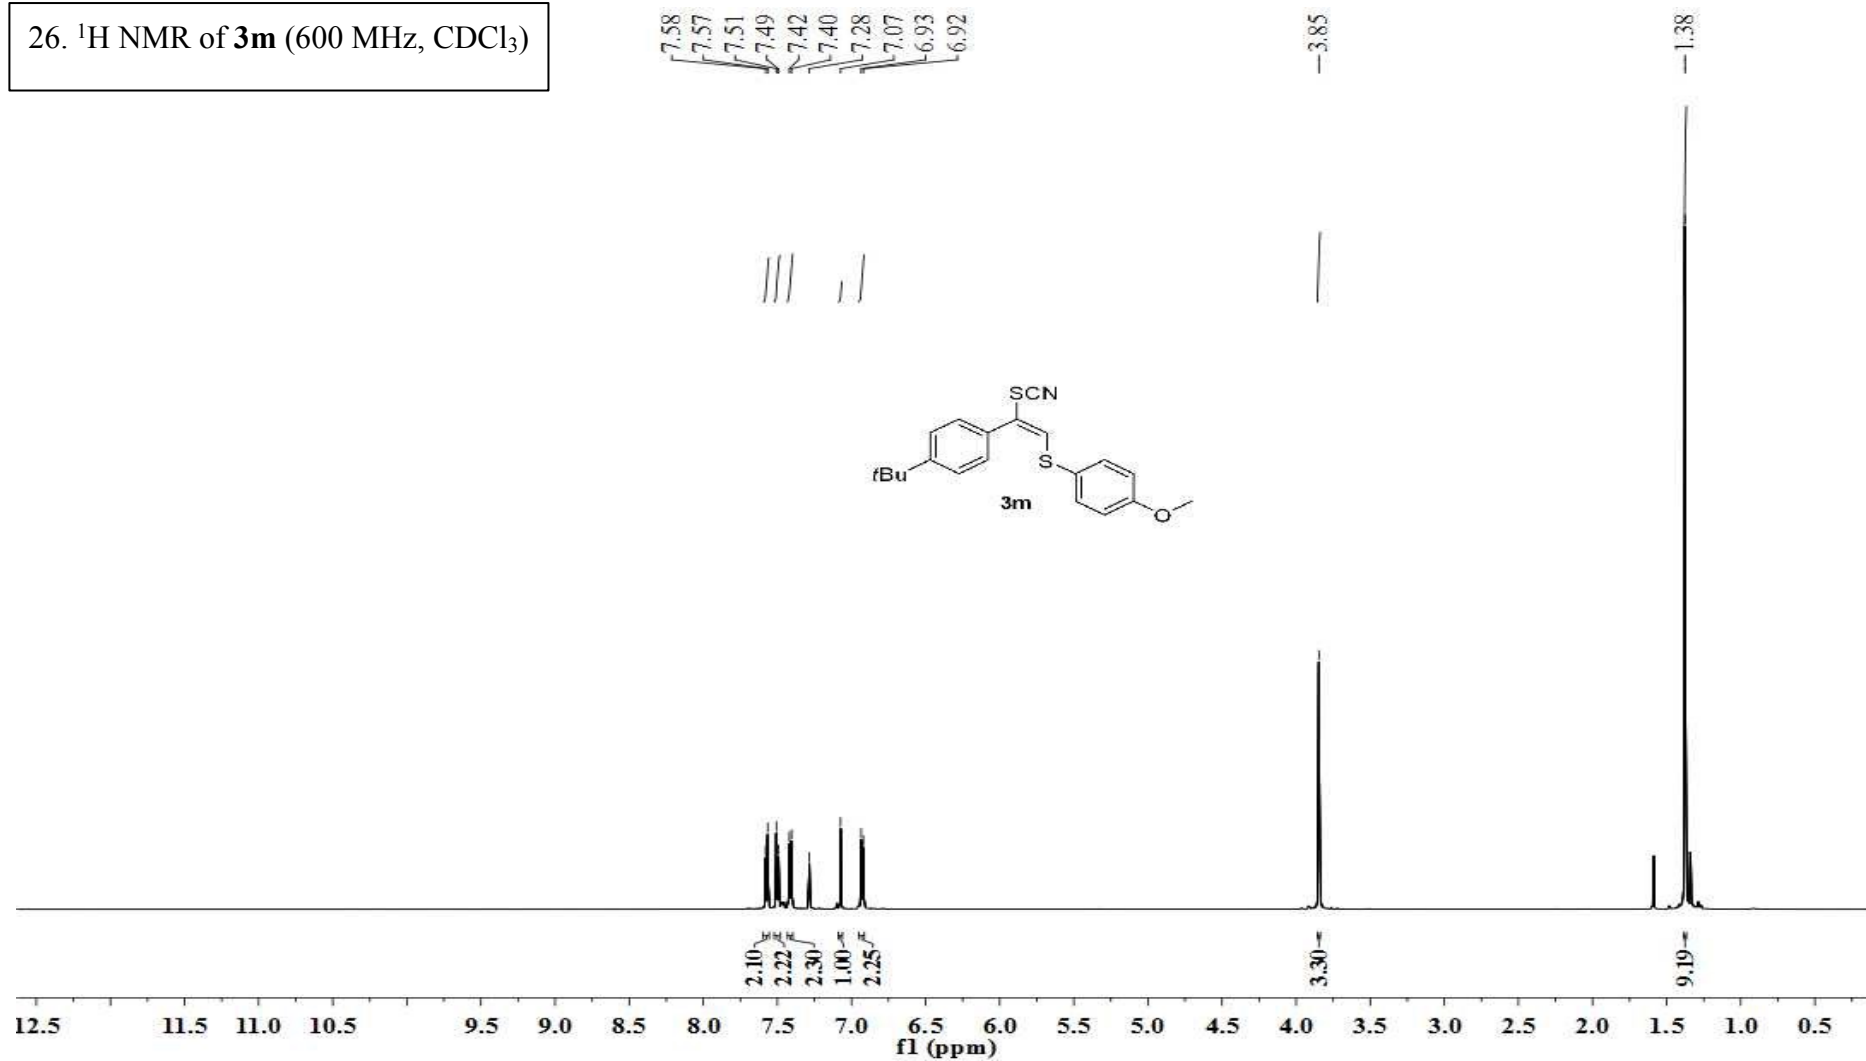



LSW-TBU-SCN-SOME

—160.22 —152.61  
/138.27 /133.64 /131.85 /128.56 /125.76 /124.41  
/116.85 /115.11 /110.88  
—55.47 —34.88 —31.22

27.  $^{13}\text{C}$  NMR of **3m** (125 MHz,  $\text{CDCl}_3$ )

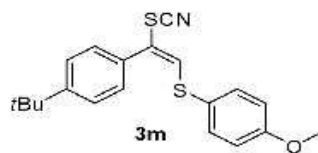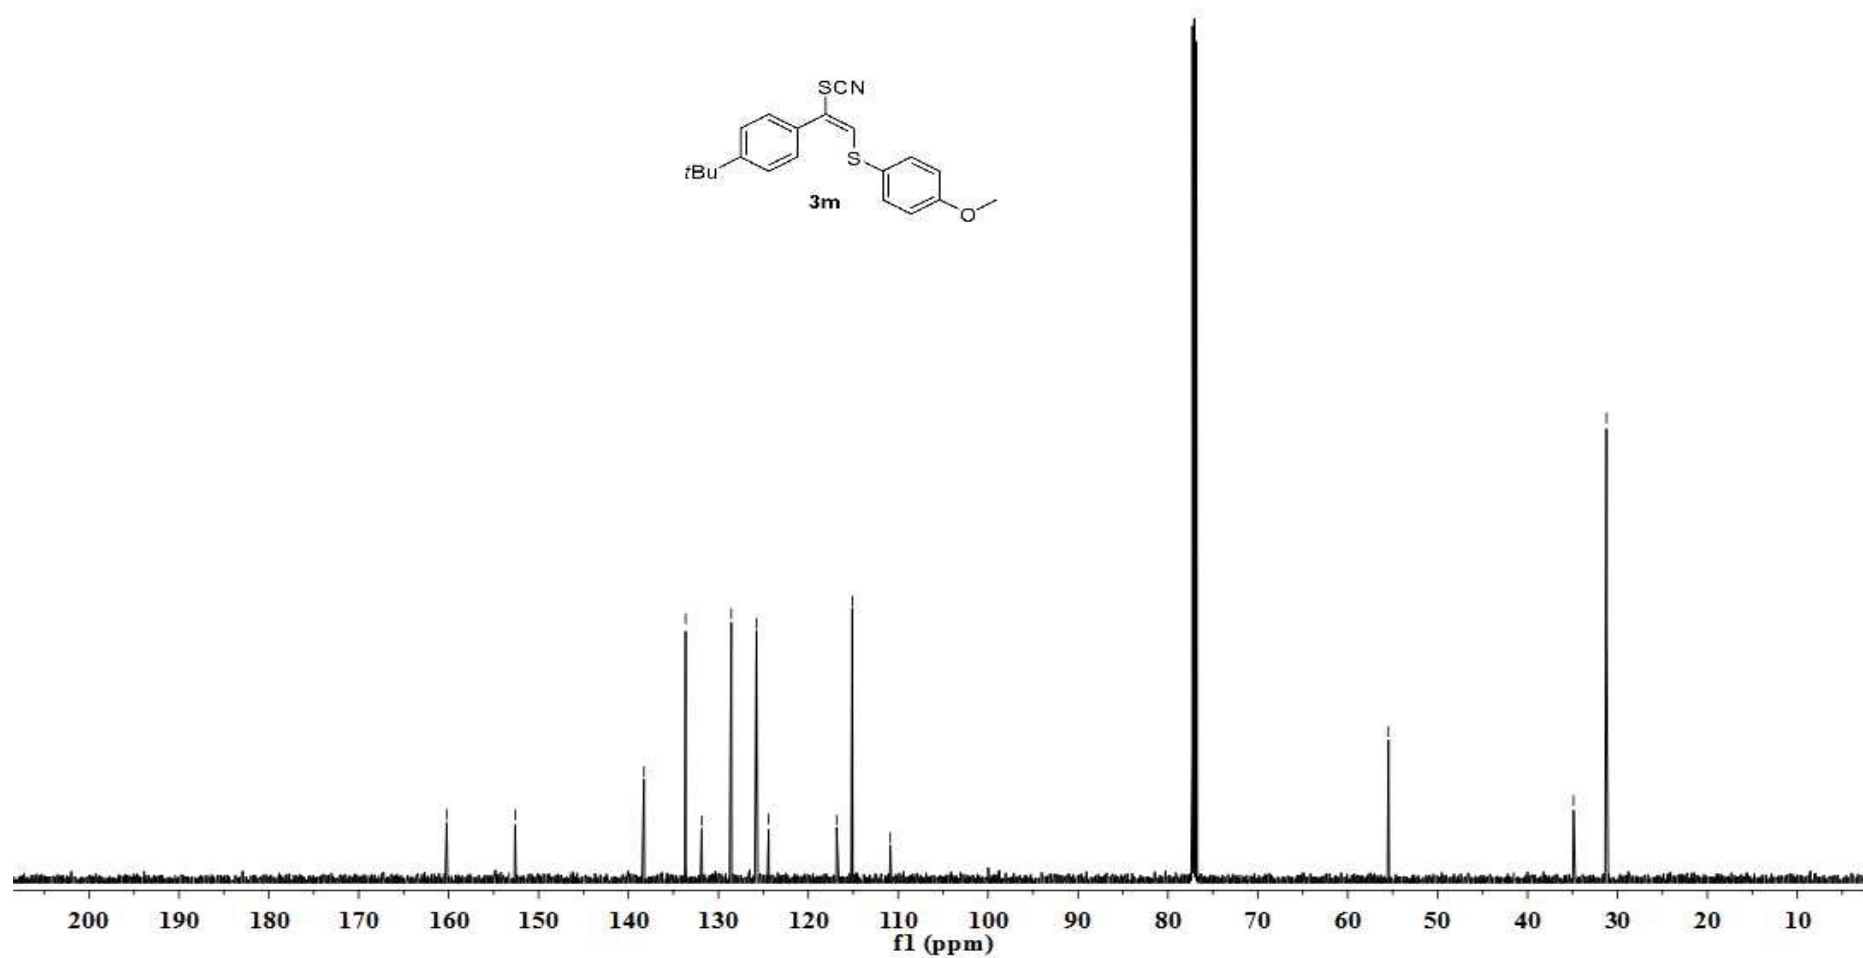

28. <sup>1</sup>H NMR of **3n** (600 MHz, CDCl<sub>3</sub>)

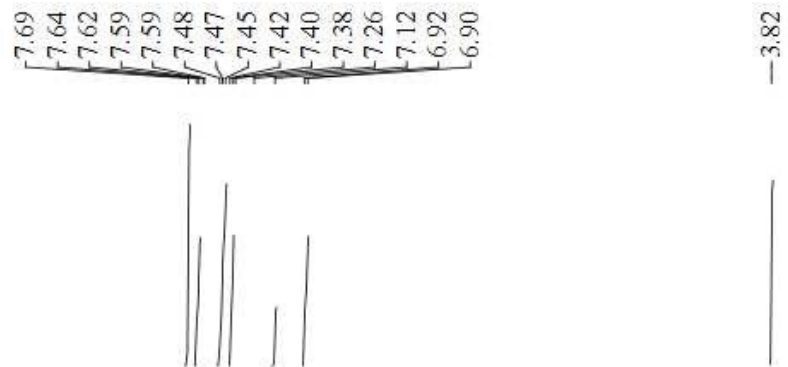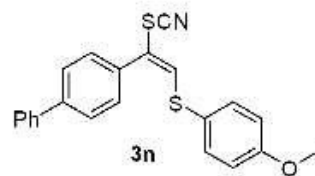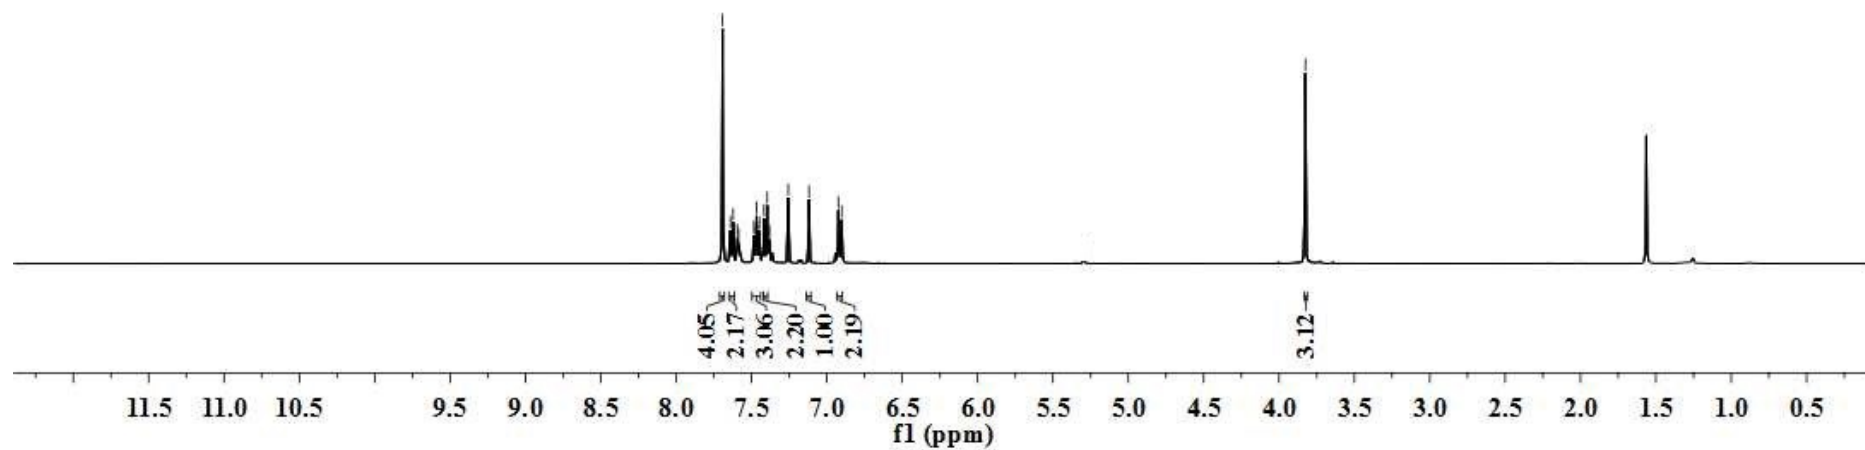

LSW-4PH-SCN-SOME

—160.33  
142.16  
140.17  
139.43  
133.94  
133.76  
129.31  
128.91  
127.83  
127.48  
127.19  
124.15  
116.41  
115.16  
110.72  
—55.49

29.  $^{13}\text{C}$  NMR of **3n** (125 MHz,  $\text{CDCl}_3$ )

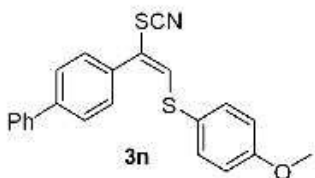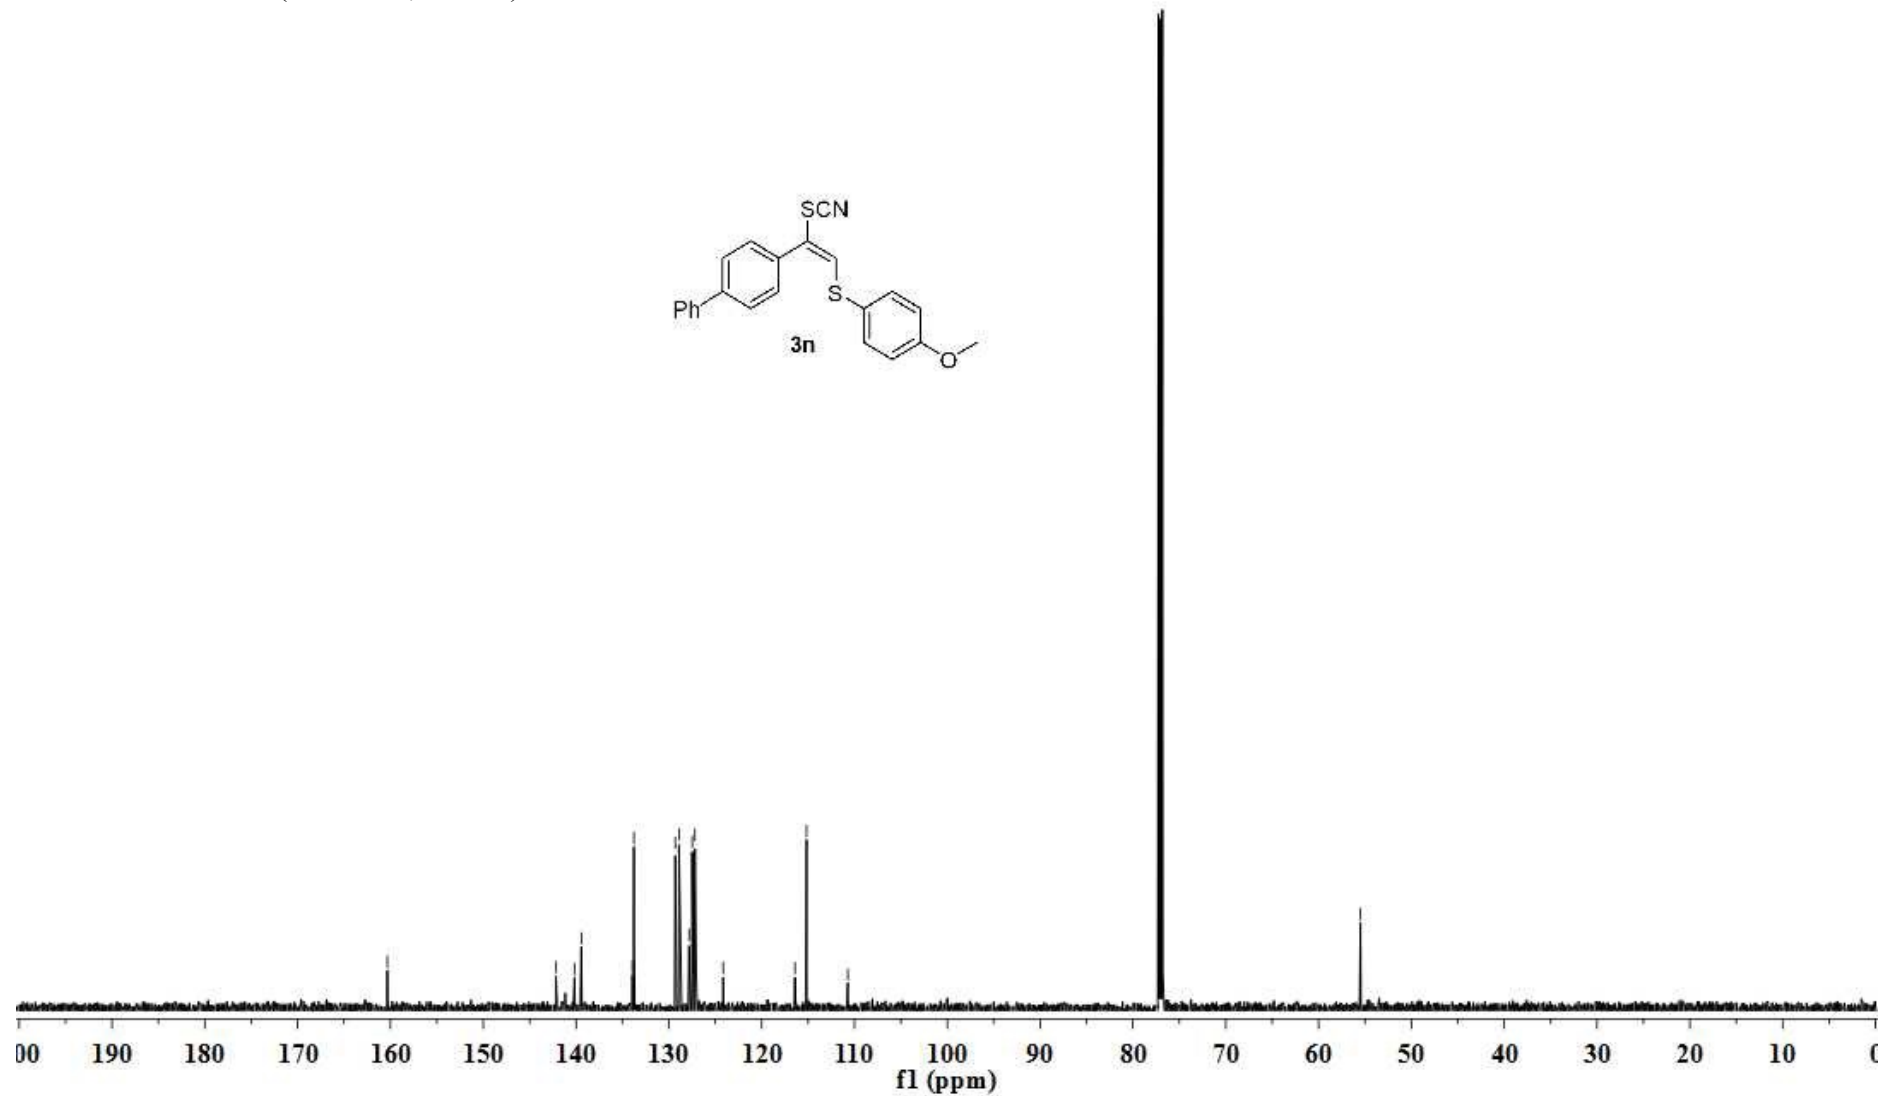

30.  $^1\text{H}$  NMR of **3o** (600 MHz,  $\text{CDCl}_3$ )

7.69  
7.67  
7.42  
7.40  
7.34  
7.33  
7.28  
7.17  
6.95  
6.93

3.85

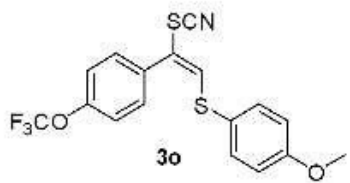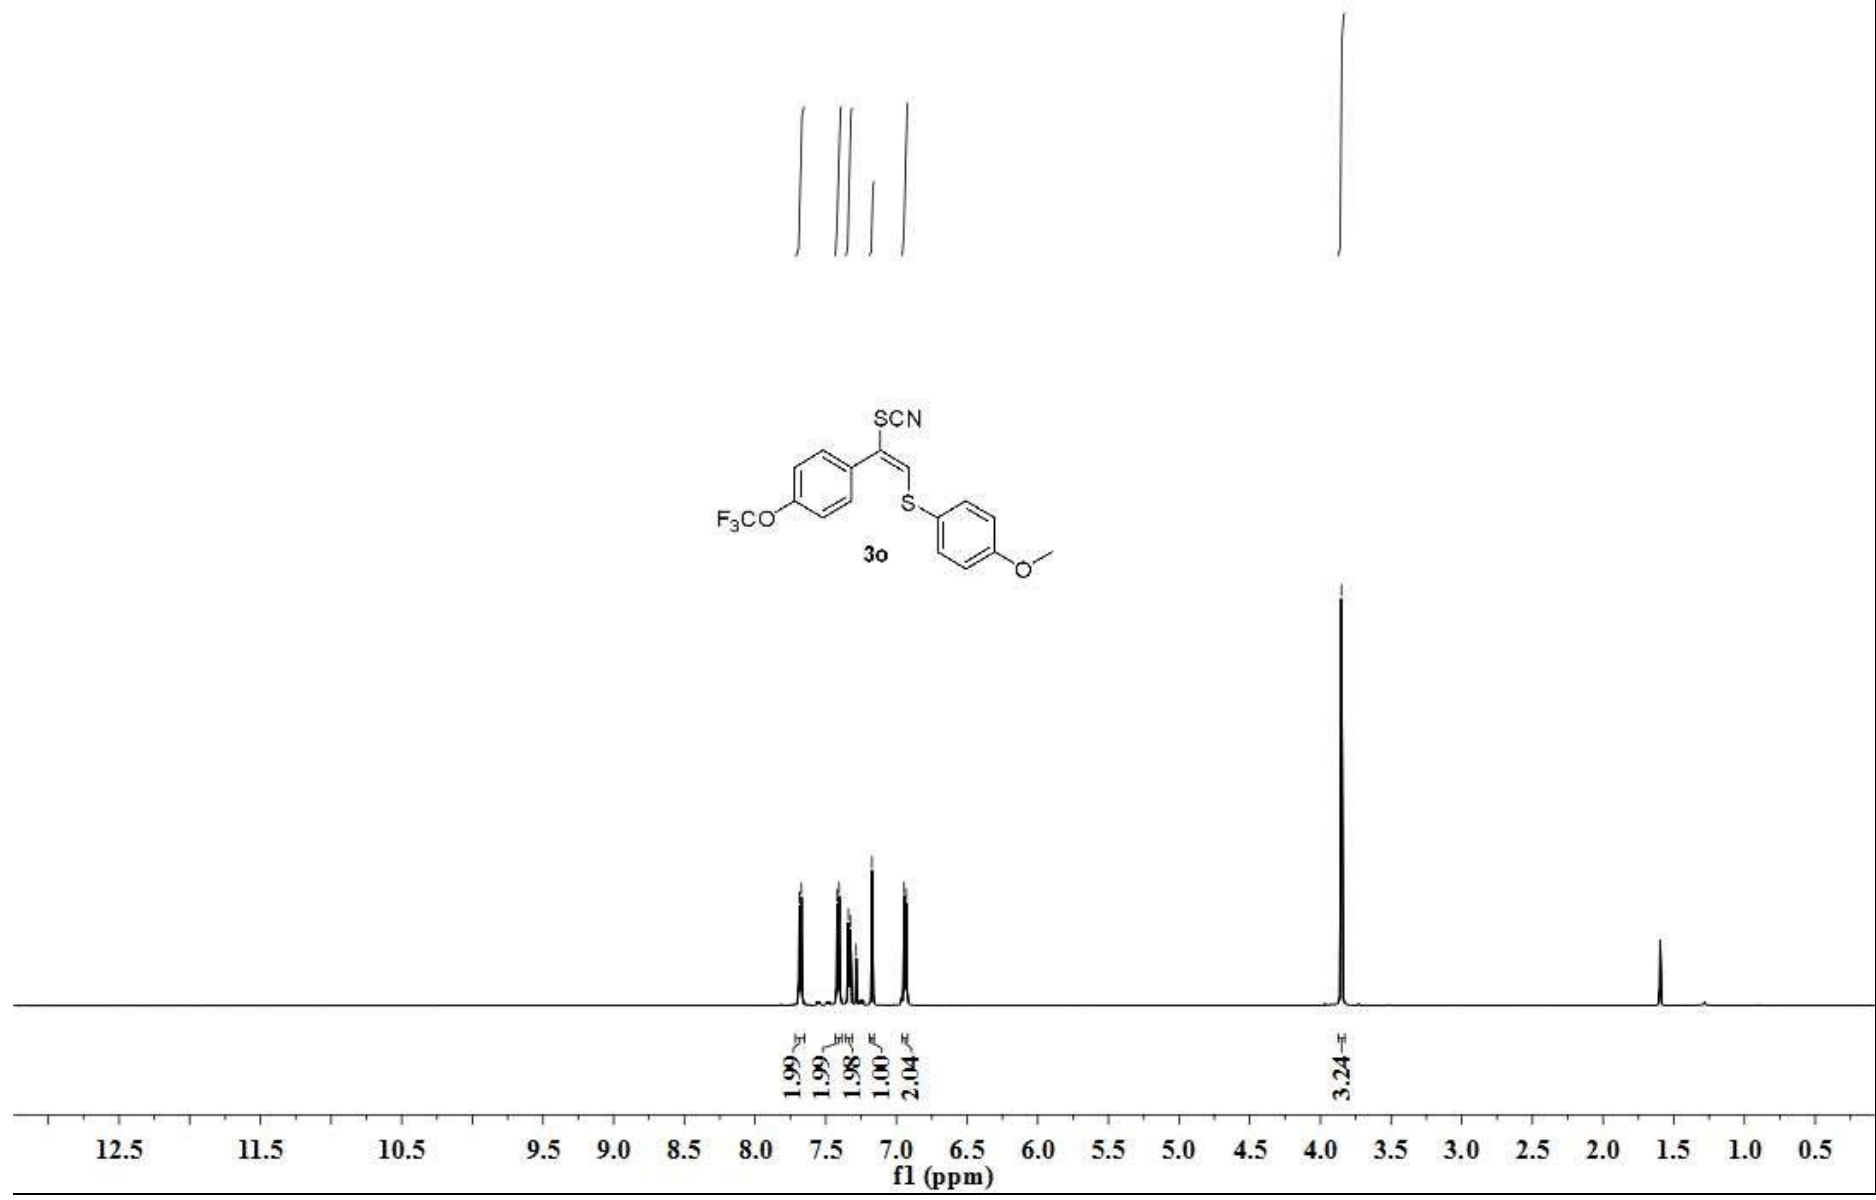

LSW-OCF3-SCN-SOME

—160.47  
149.49  
149.47  
141.15  
133.86  
133.47  
130.57  
123.57  
122.97  
121.26  
121.06  
119.55  
117.84  
115.22  
114.93  
110.32

—55.49

31.  $^{13}\text{C}$  NMR of **3o** (125 MHz,  $\text{CDCl}_3$ )

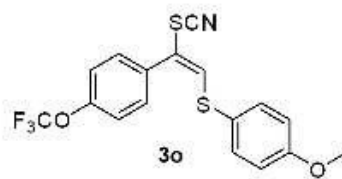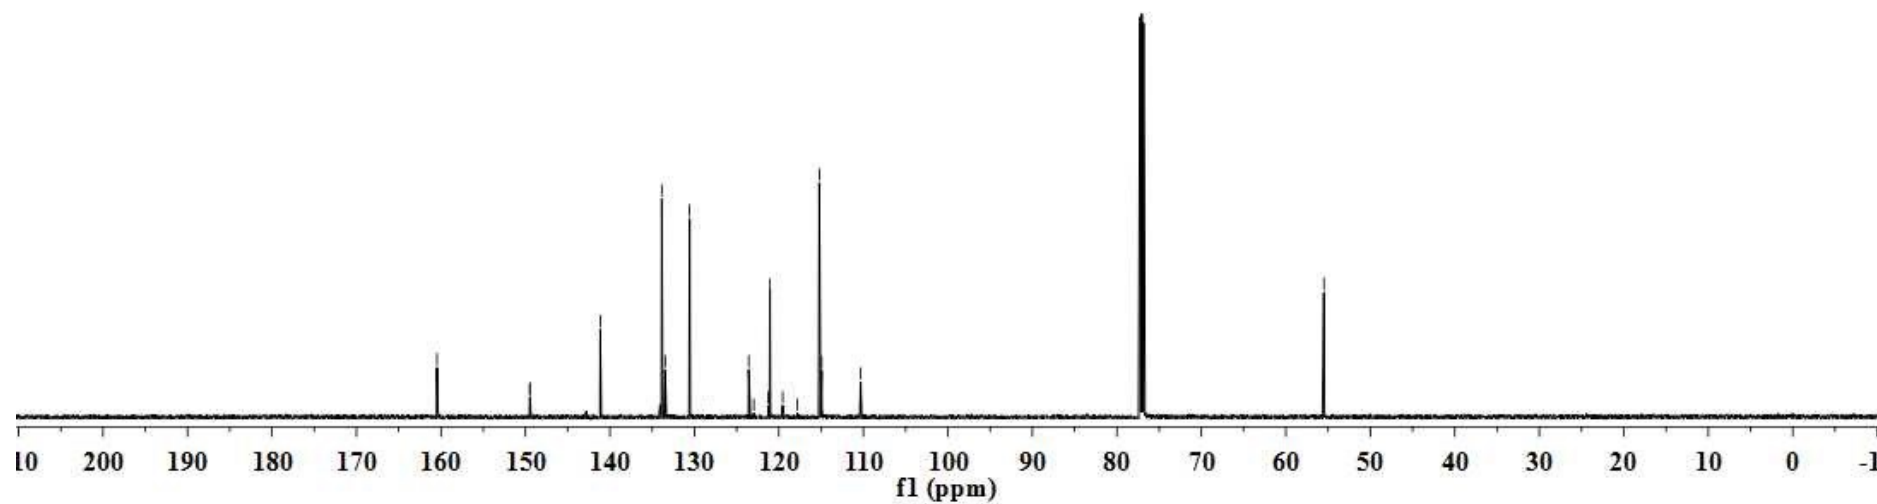

LSW-OCF3-SCN-SOME

31.  $^{19}\text{F}$  NMR of **3o** (600 MHz,  $\text{CDCl}_3$ )

--57.65

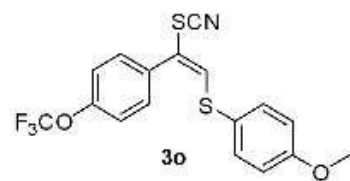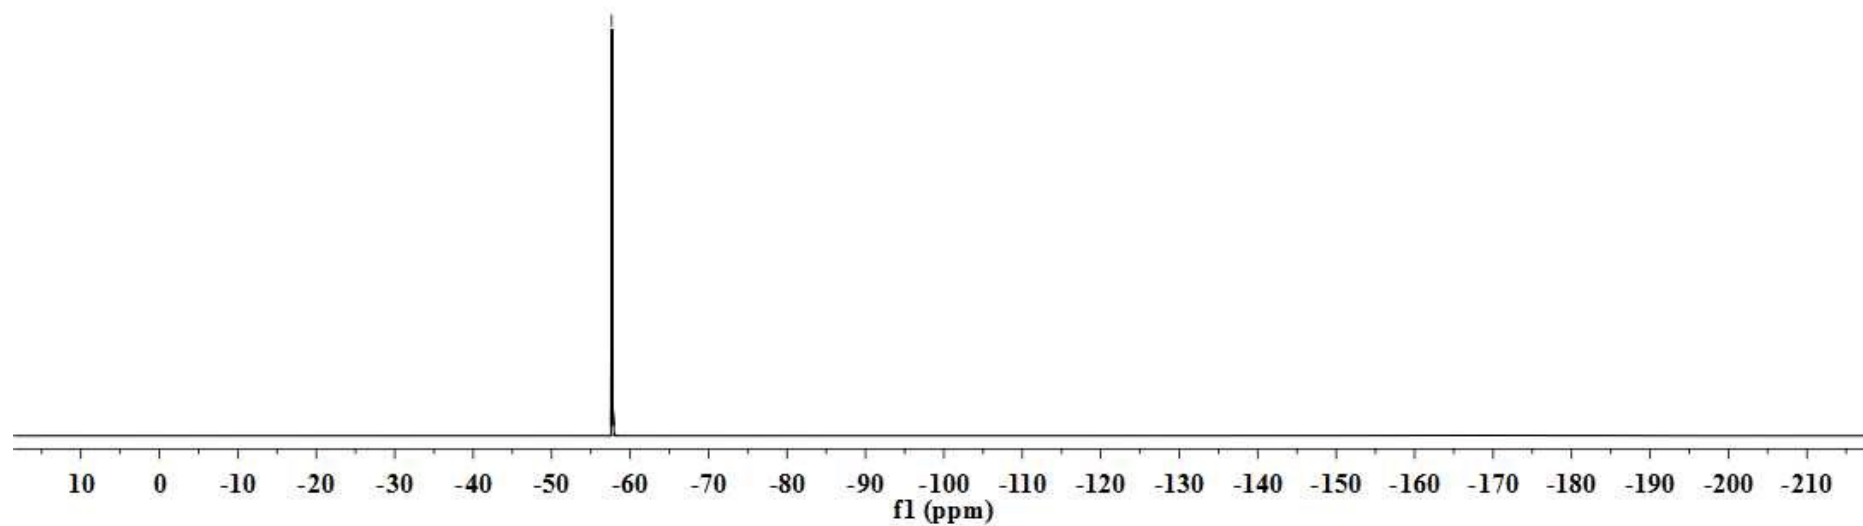

32. <sup>1</sup>H NMR of **3p** (600 MHz, CDCl<sub>3</sub>)

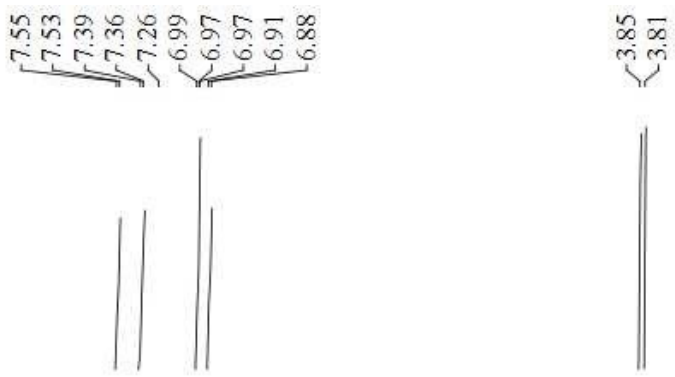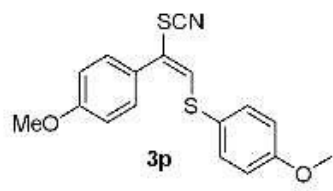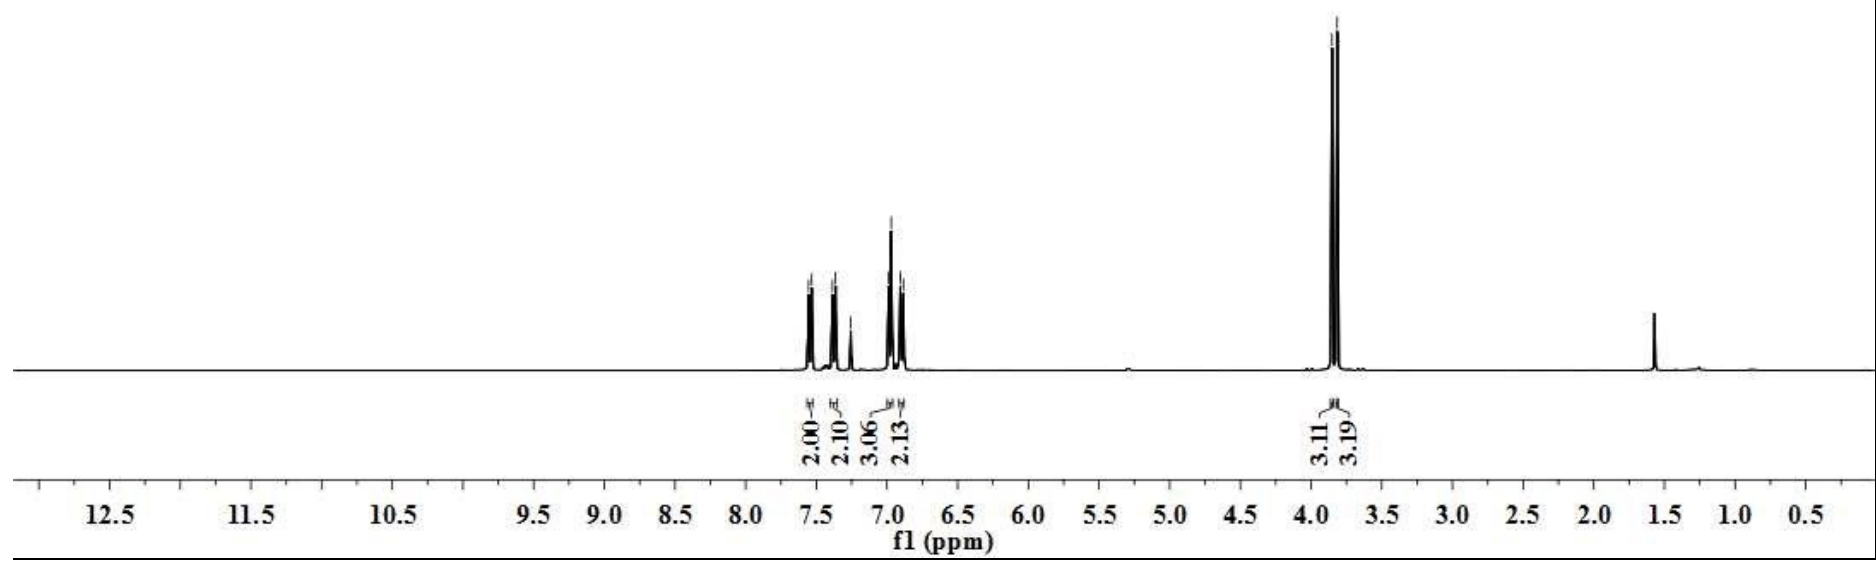

LSW-40ME-SCN-SOME

160.25  
160.19

137.13  
133.61  
130.42  
127.06  
124.35  
116.95  
115.10  
114.19  
110.80

55.48  
55.40

33.  $^{13}\text{C}$  NMR of **3p** (125 MHz,  $\text{CDCl}_3$ )

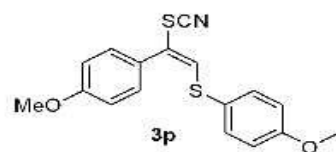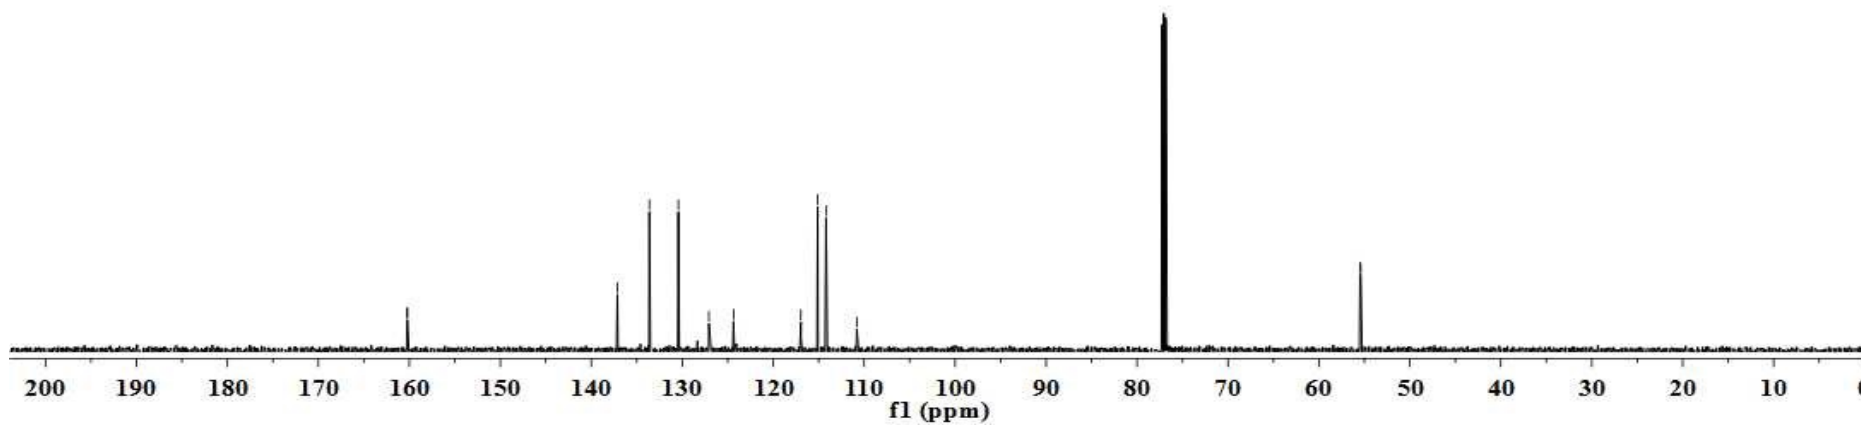



34.  $^1\text{H}$  NMR of **3q** (600 MHz,  $\text{CDCl}_3$ )

LSW-4AC-SCN-SPH

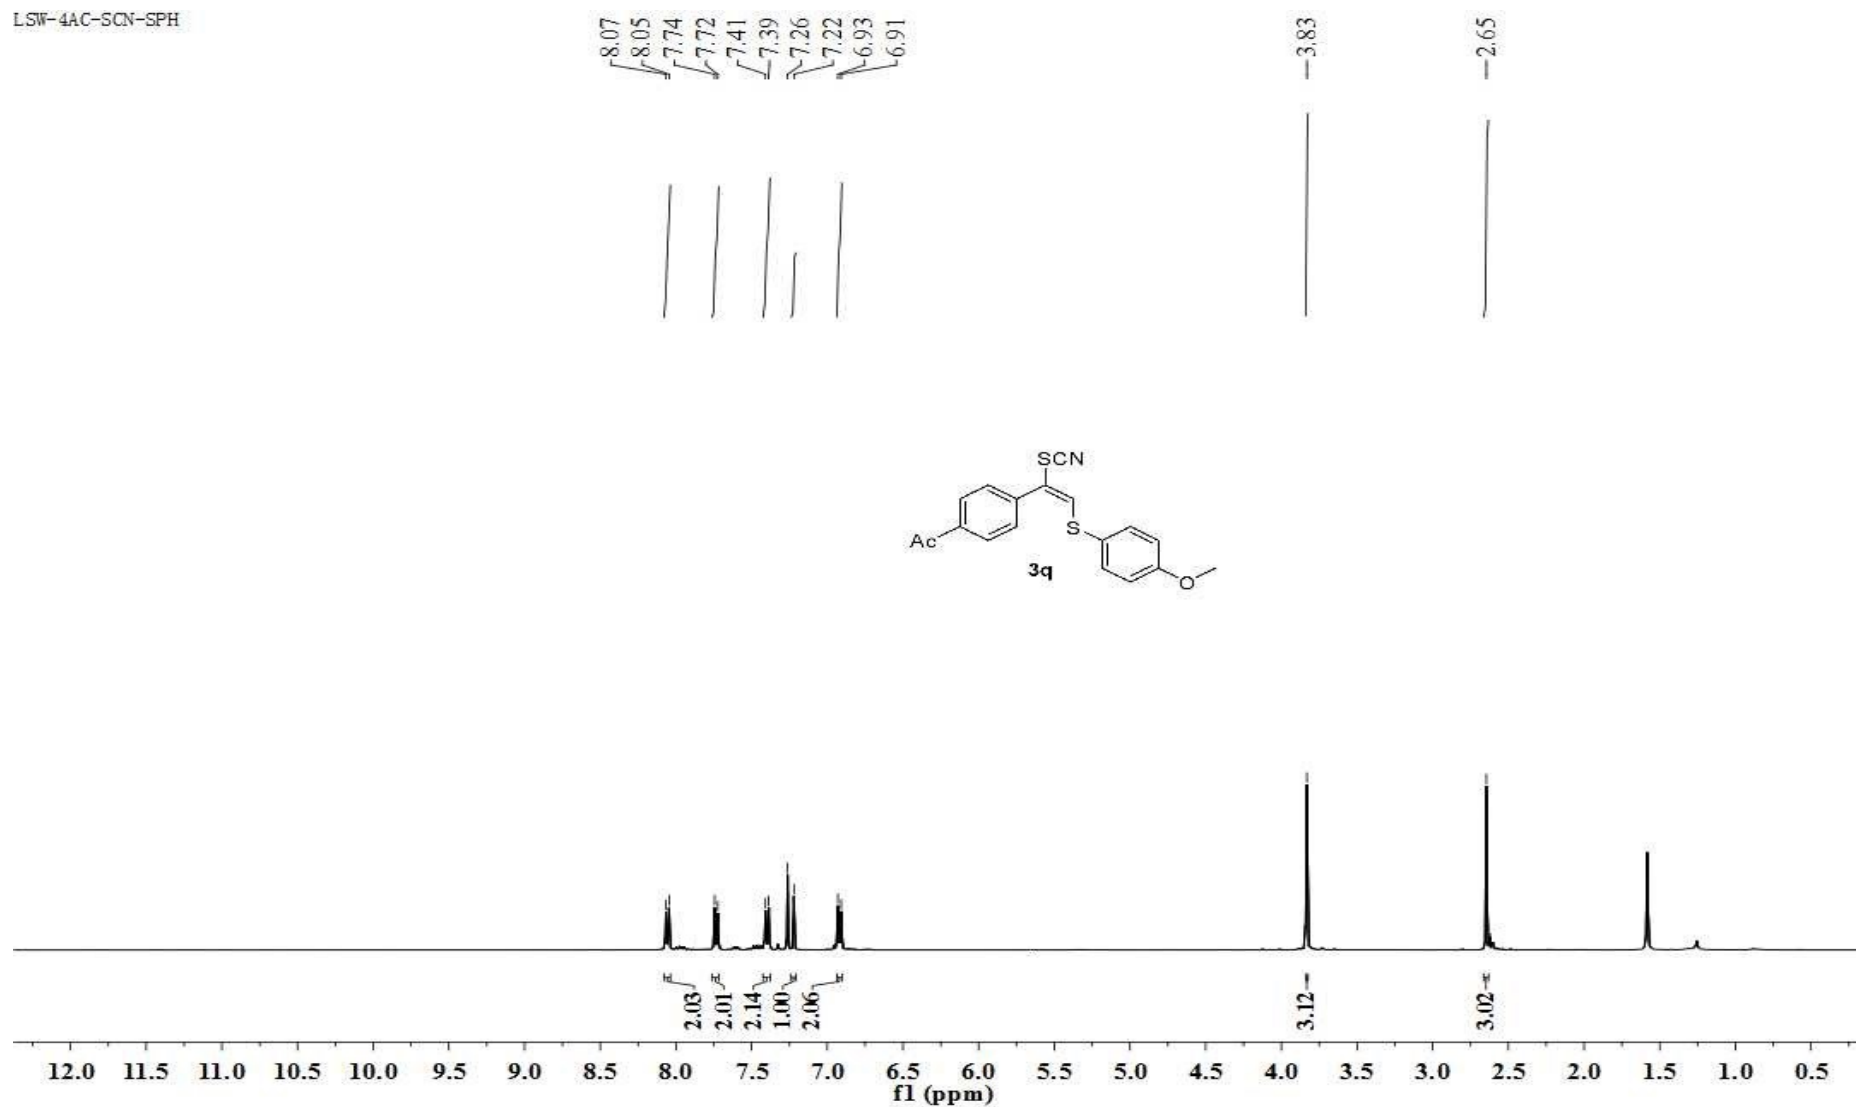

35.  $^{13}\text{C}$  NMR of **3q** (125 MHz,  $\text{CDCl}_3$ )

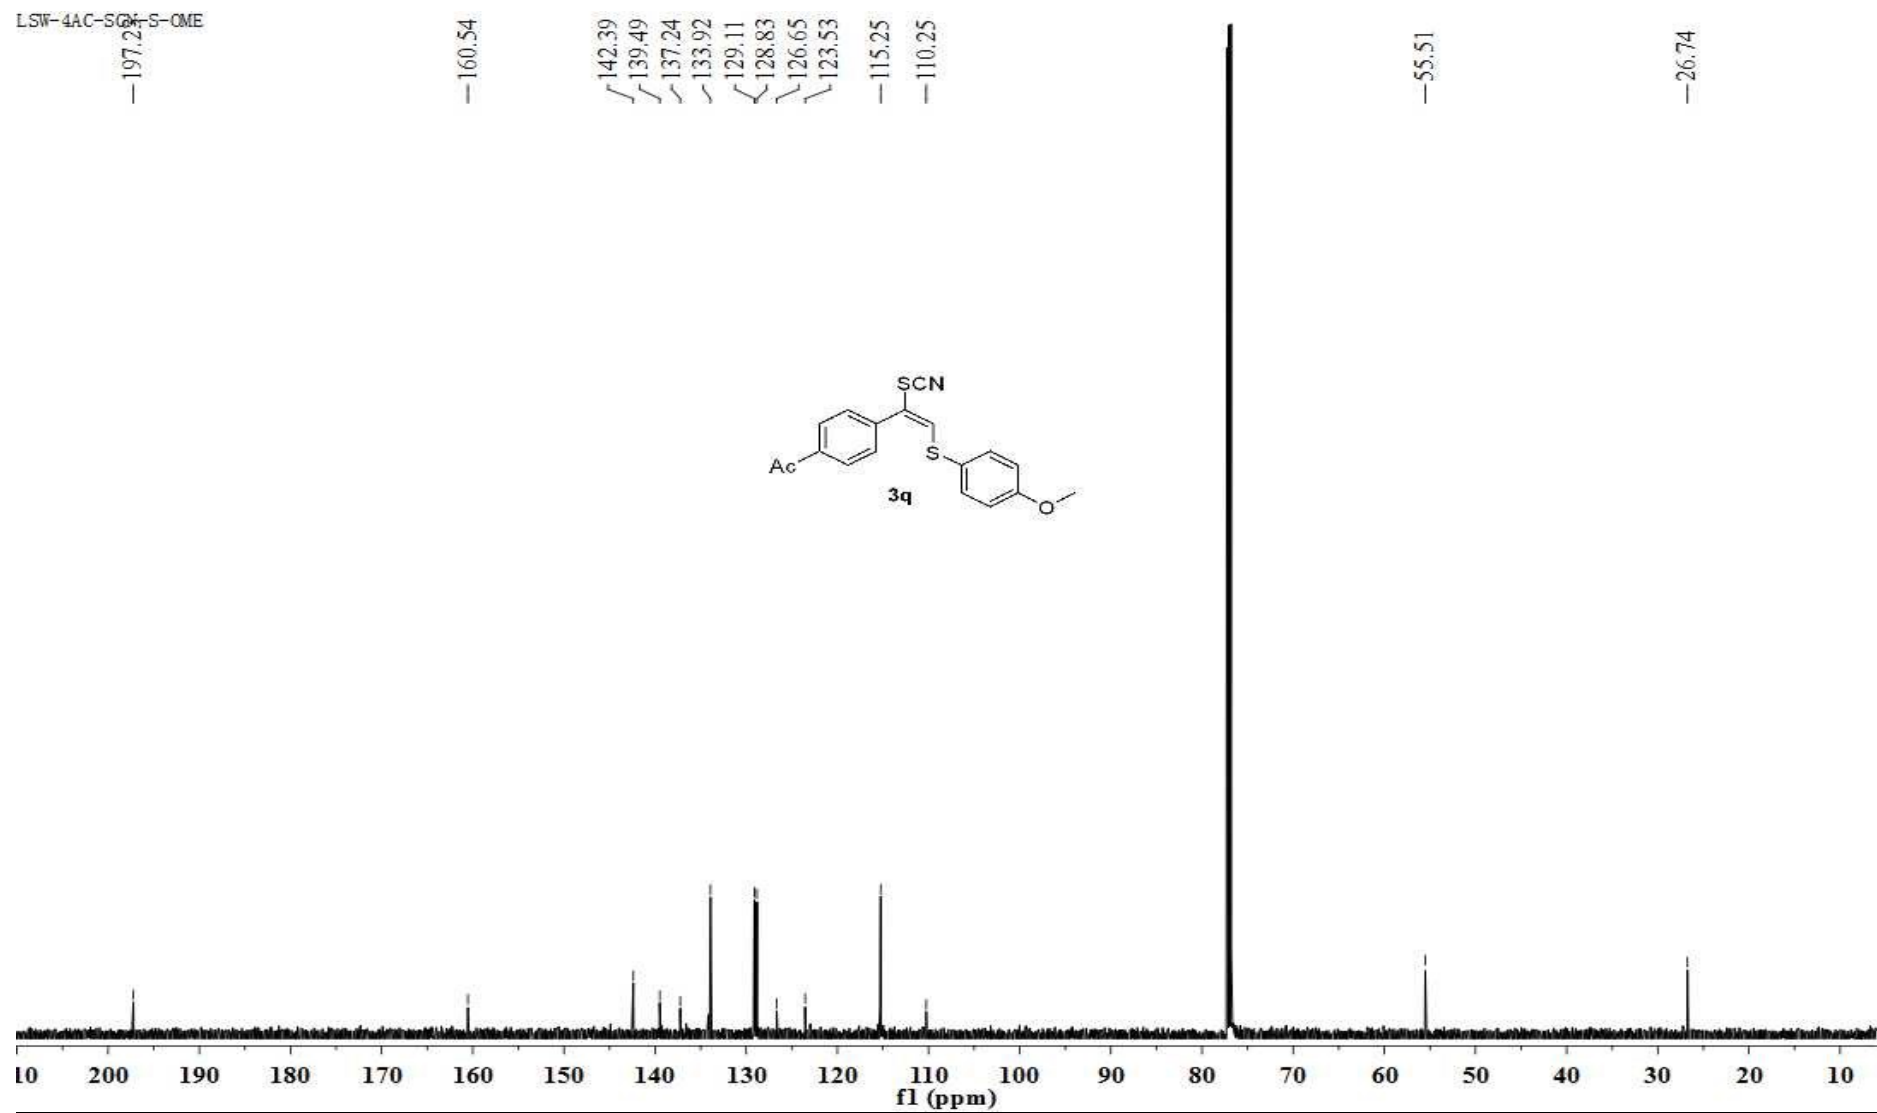

36. <sup>1</sup>H NMR of **3r** (600 MHz, CDCl<sub>3</sub>)

LSW-QUE-PRO-SCN-SOME

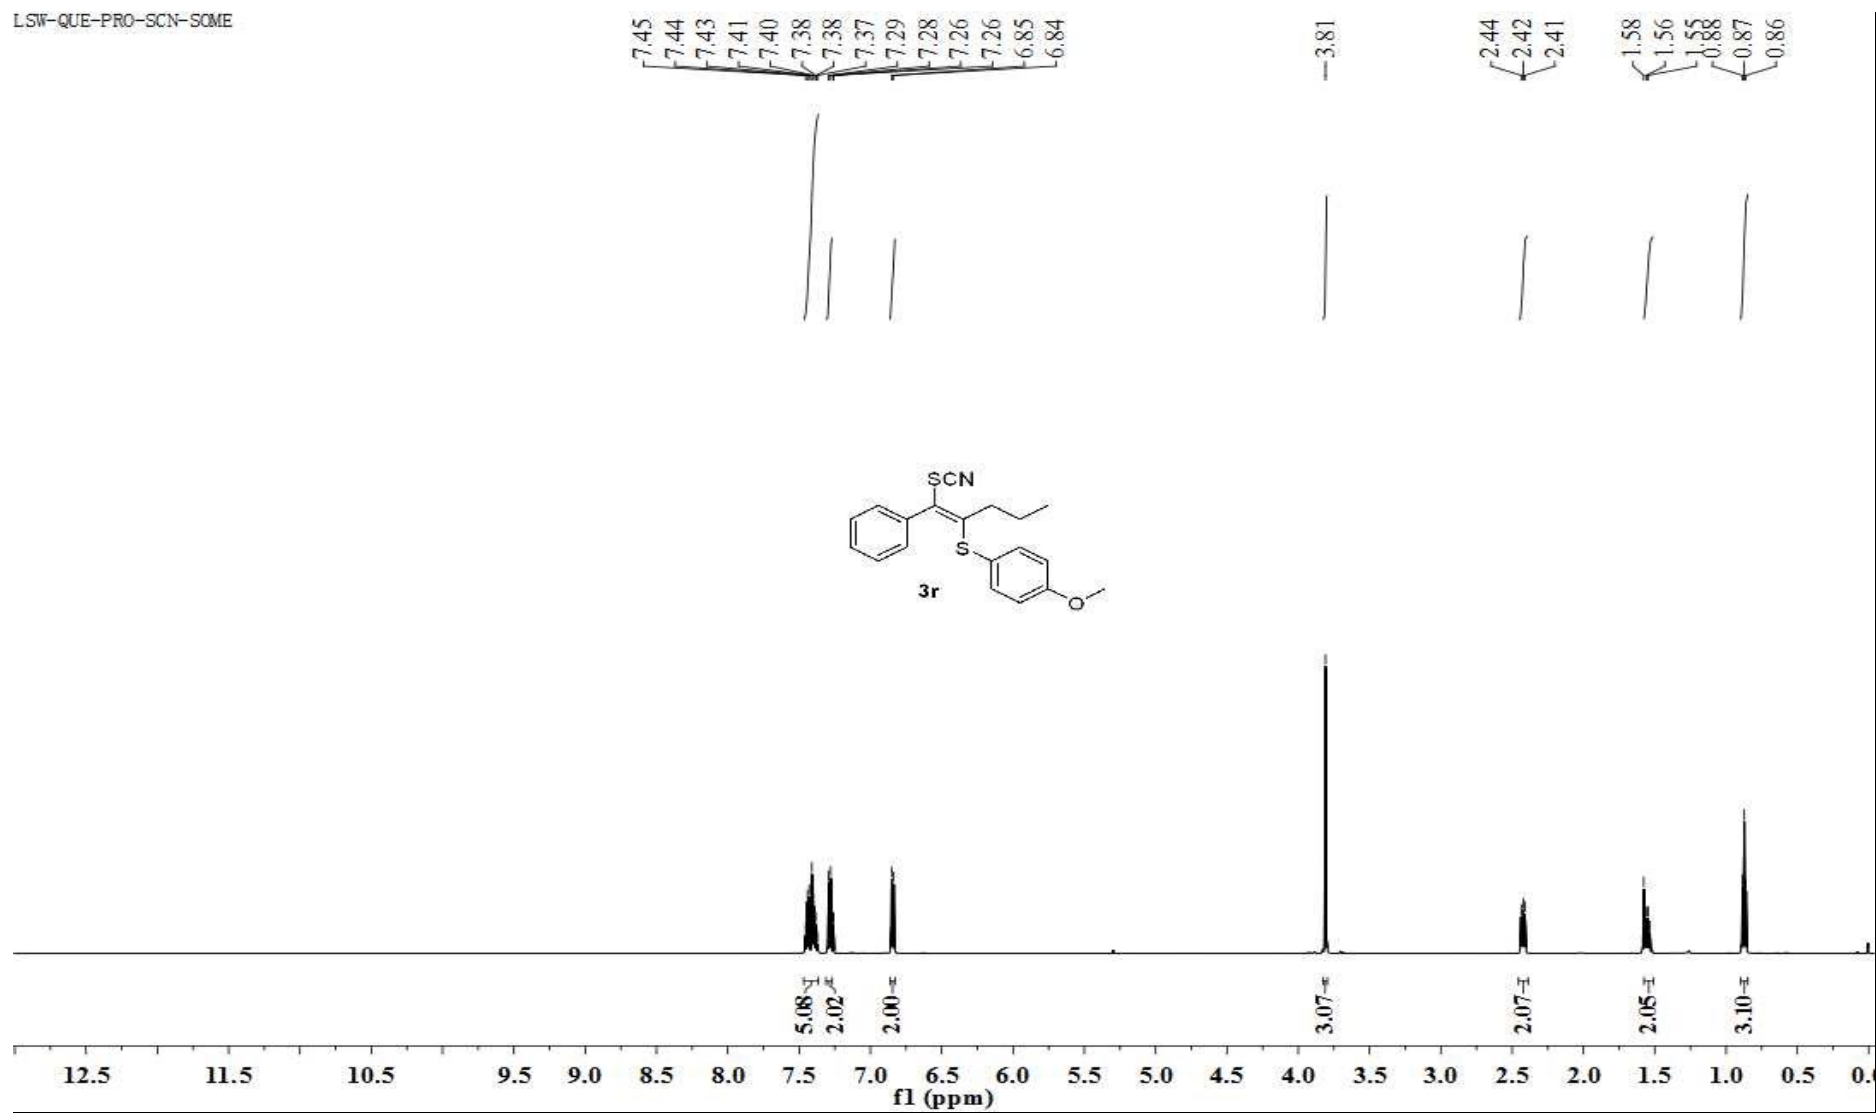

37.  $^{13}\text{C}$  NMR of **3r** (125 MHz,  $\text{CDCl}_3$ )

LSW-QUE-PRO-SCN-SOME

- 160.32
- 149.06
- 137.77
- 136.02
- 129.68
- 128.94
- 128.71
- 122.29
- 117.58
- 114.75
- 110.30
- 55.40
- 35.69
- 22.13
- 13.55

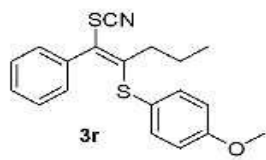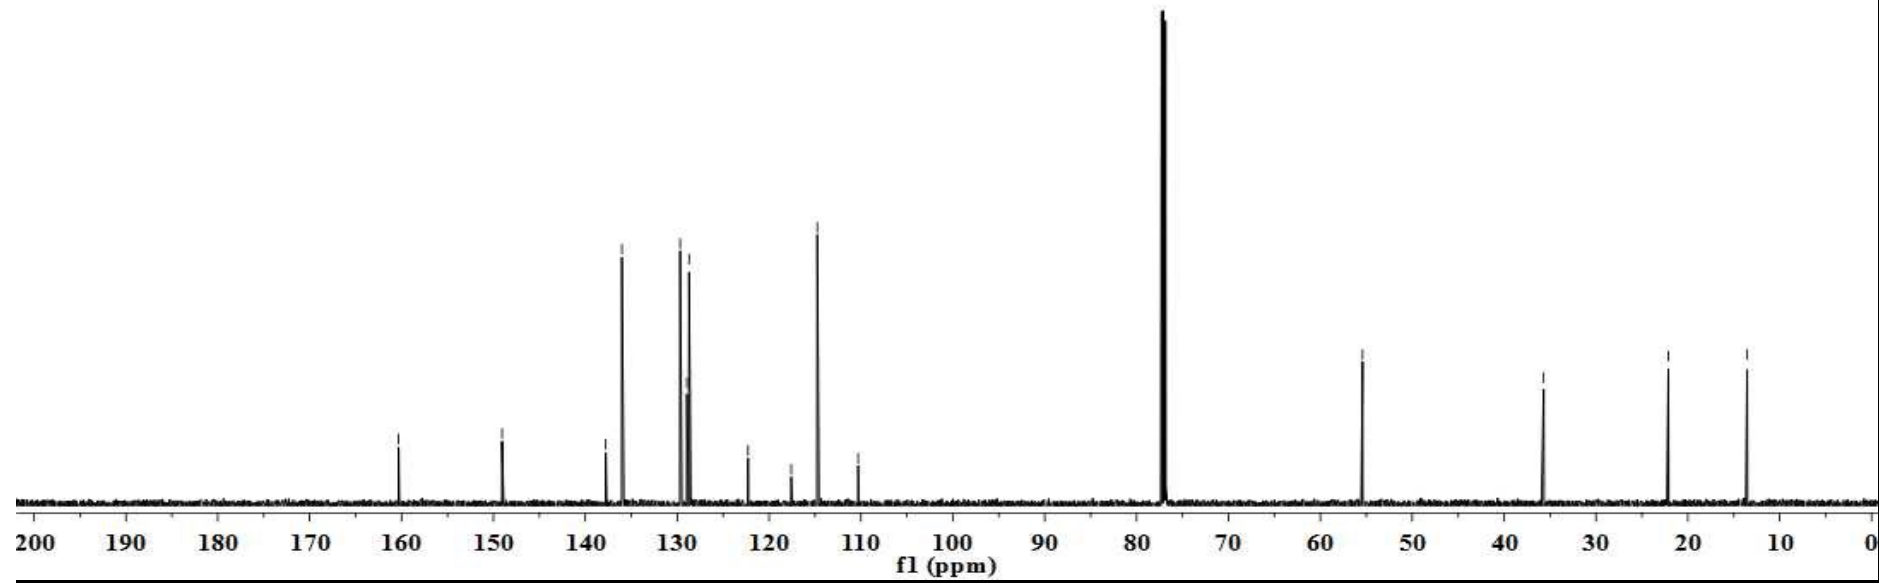

38. <sup>1</sup>H NMR of **3s** (125 MHz, CDCl<sub>3</sub>)

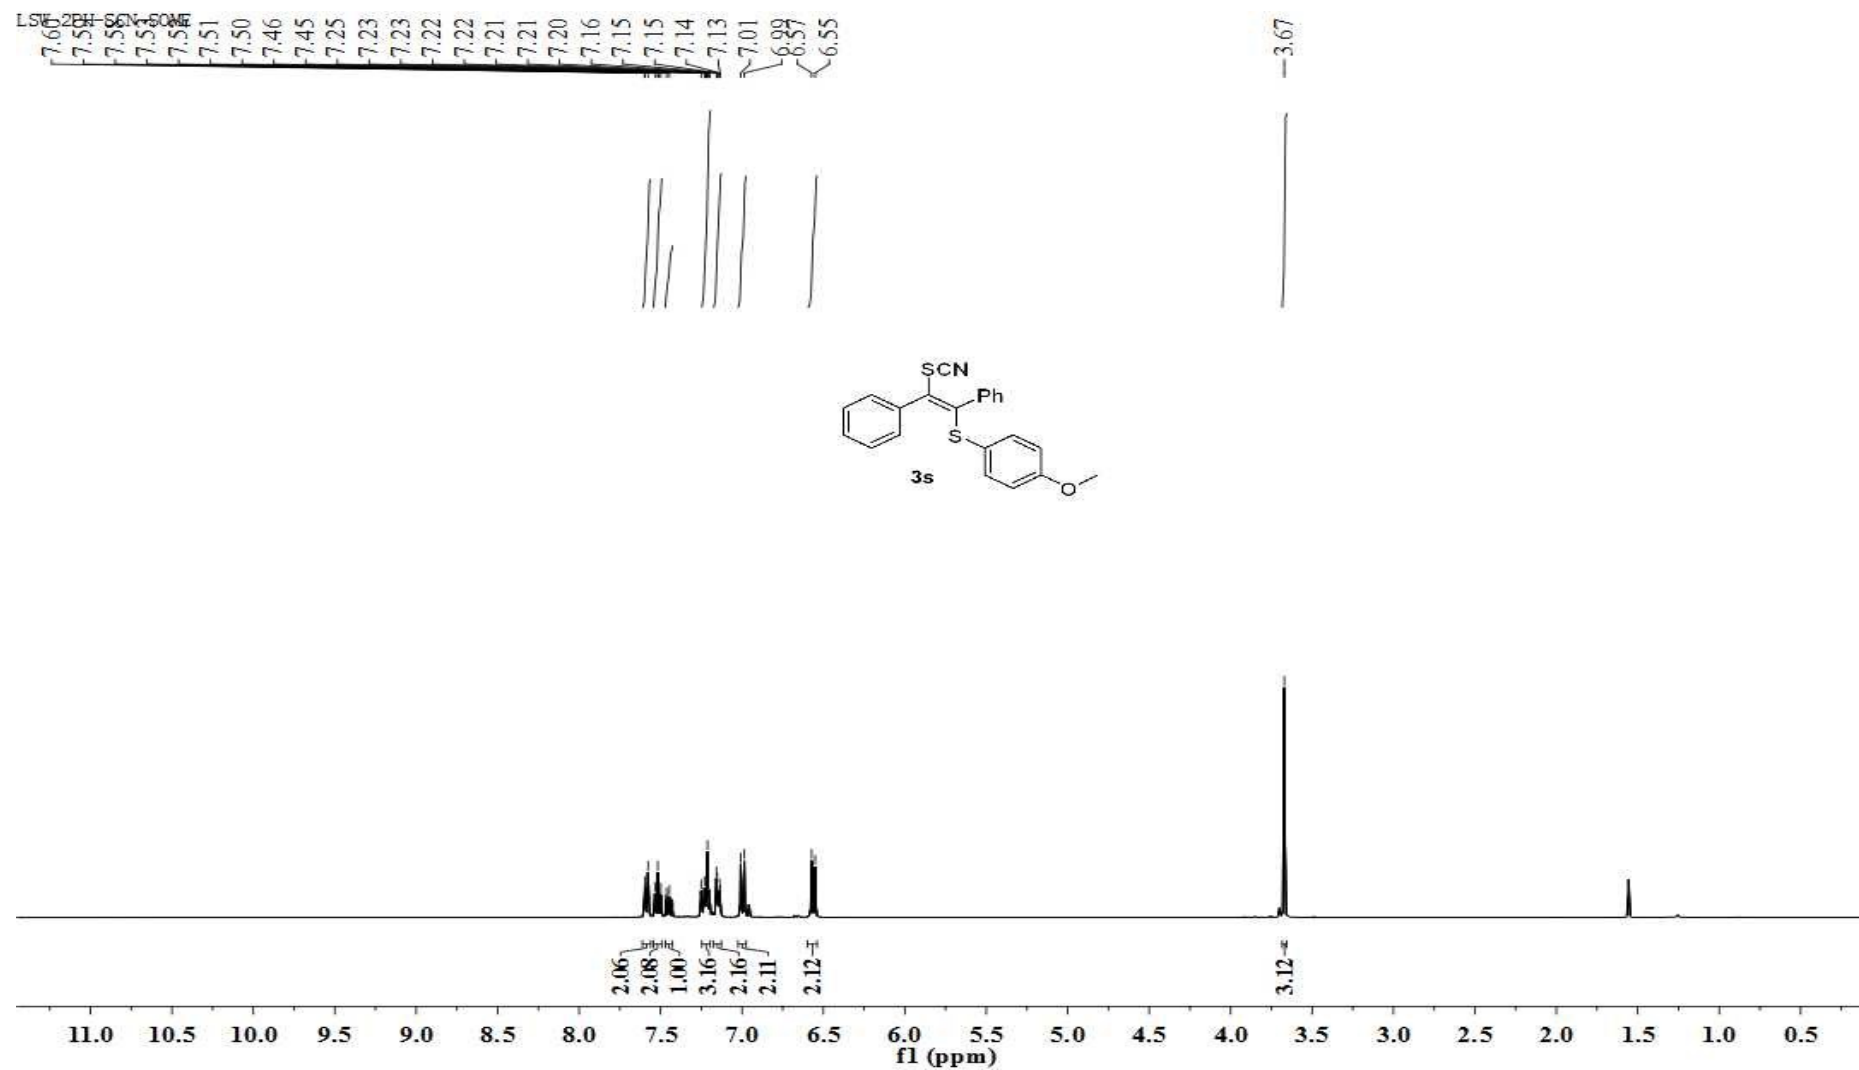

39.  $^{13}\text{C}$  NMR of **3s** (125 MHz,  $\text{CDCl}_3$ )

LSW-2PH-SCN-SOME

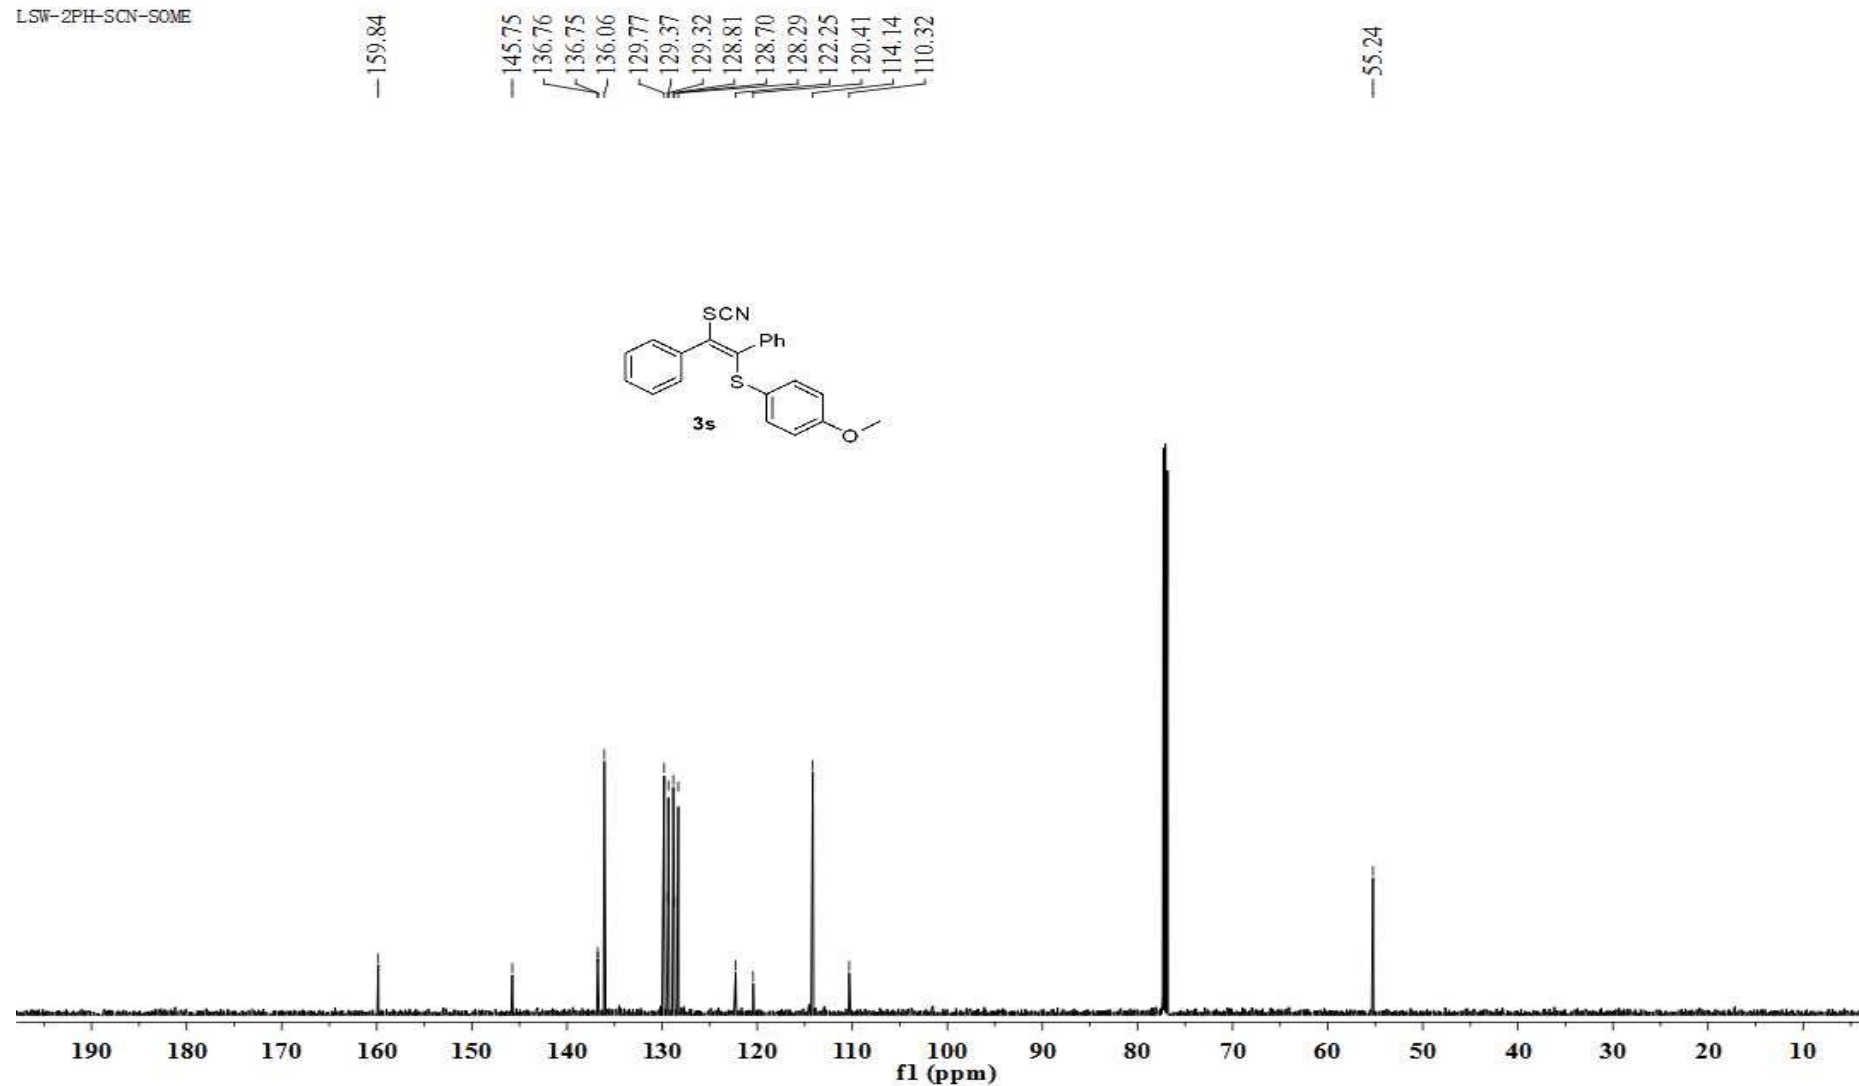

40. <sup>1</sup>H NMR of **3t** (600 MHz, CDCl<sub>3</sub>)

LSW-QUE-CL-SCN-SOME

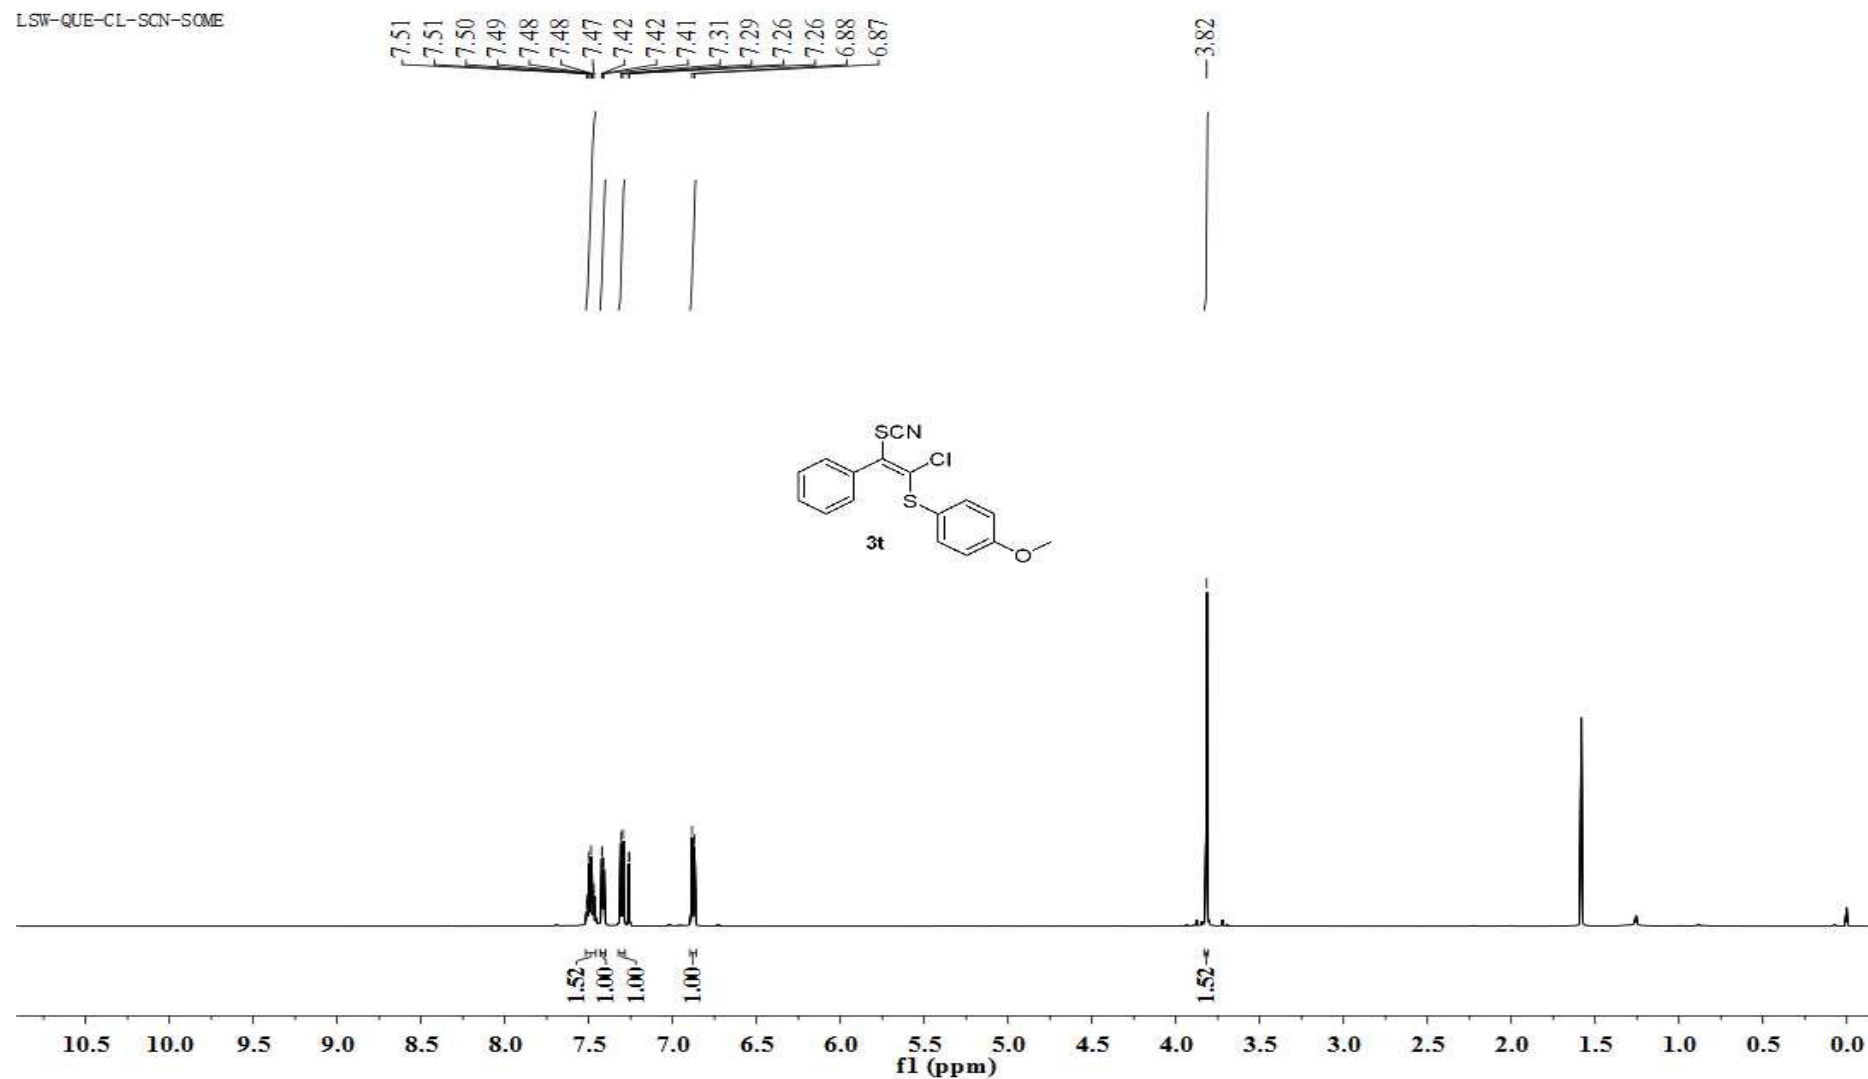

41.  $^{13}\text{C}$  NMR of **3t** (125 MHz,  $\text{CDCl}_3$ )

LSW-QUE-CL-SCN-SOME

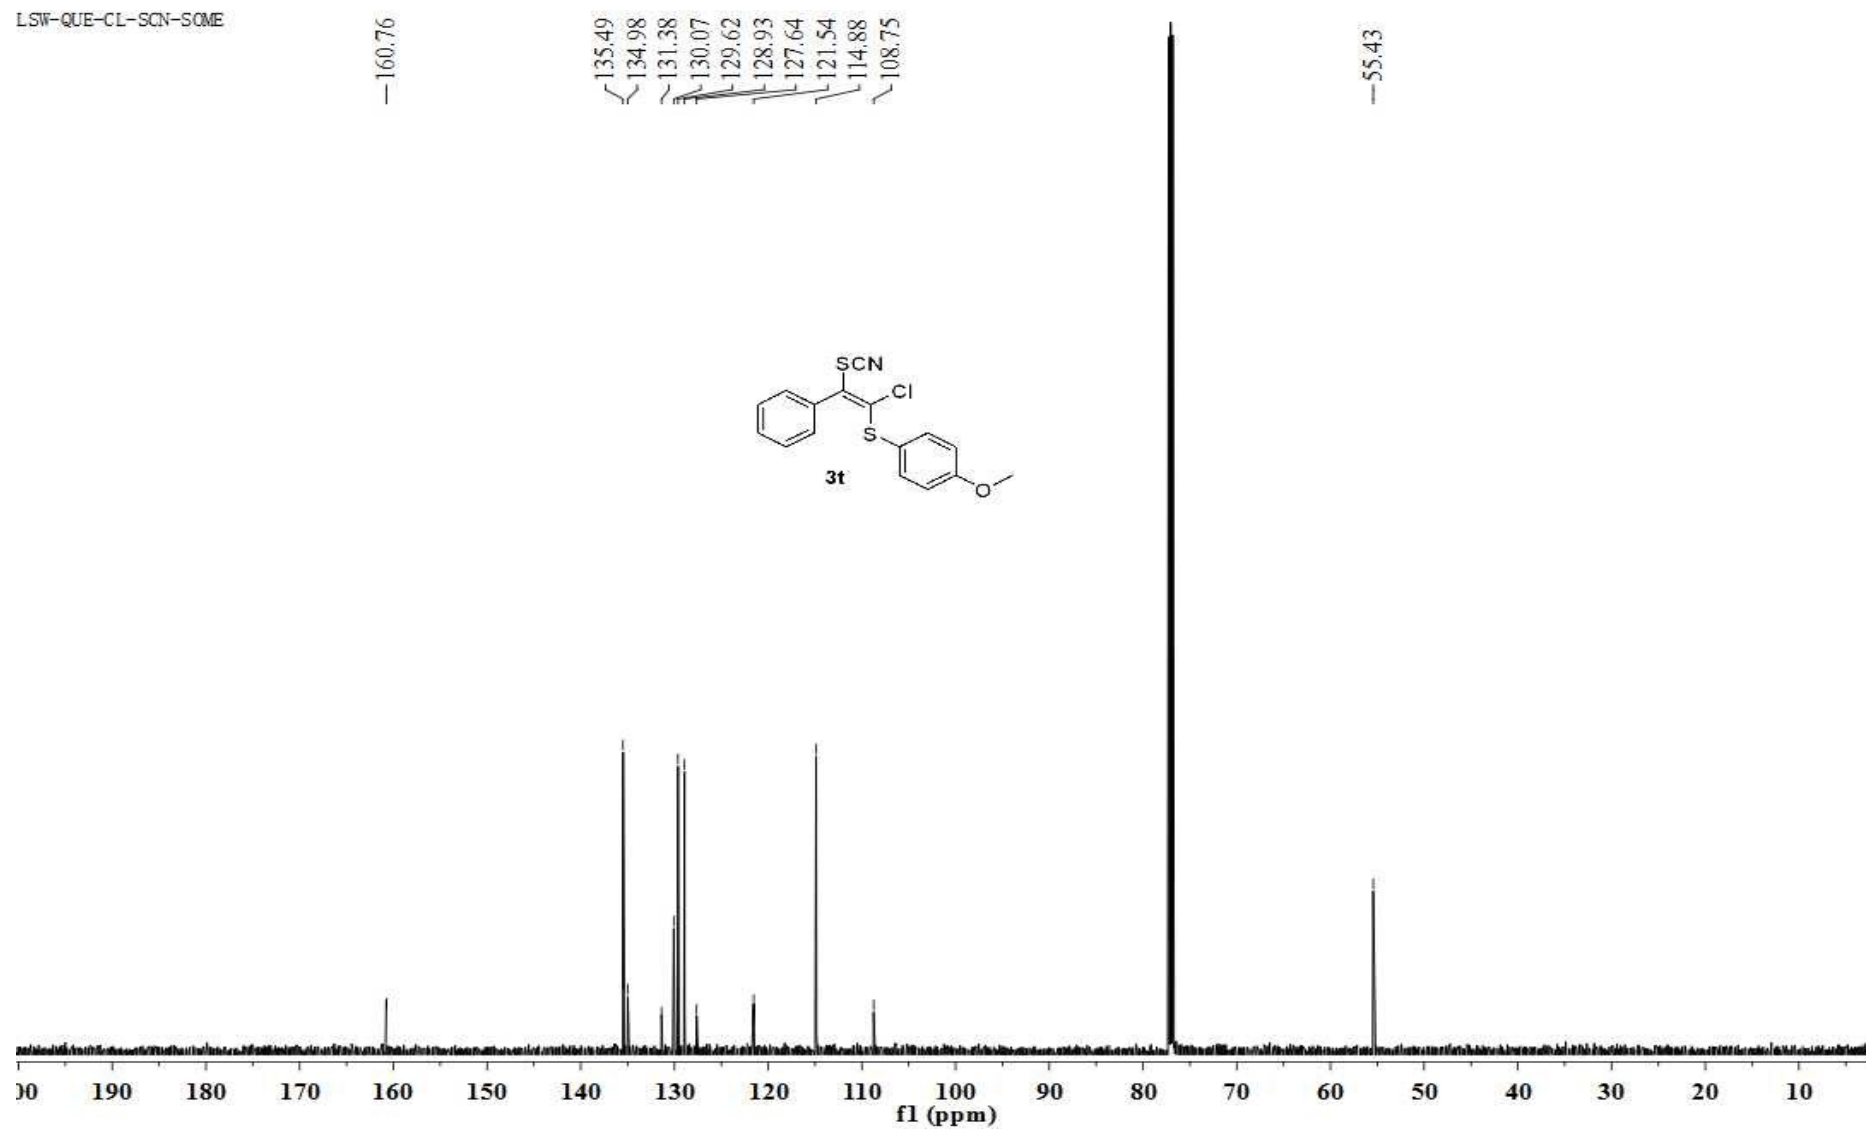



42.  $^1\text{H}$  NMR of **3u** (600 MHz,  $\text{CDCl}_3$ )

LSW-QUE-BR-SCN-SOME

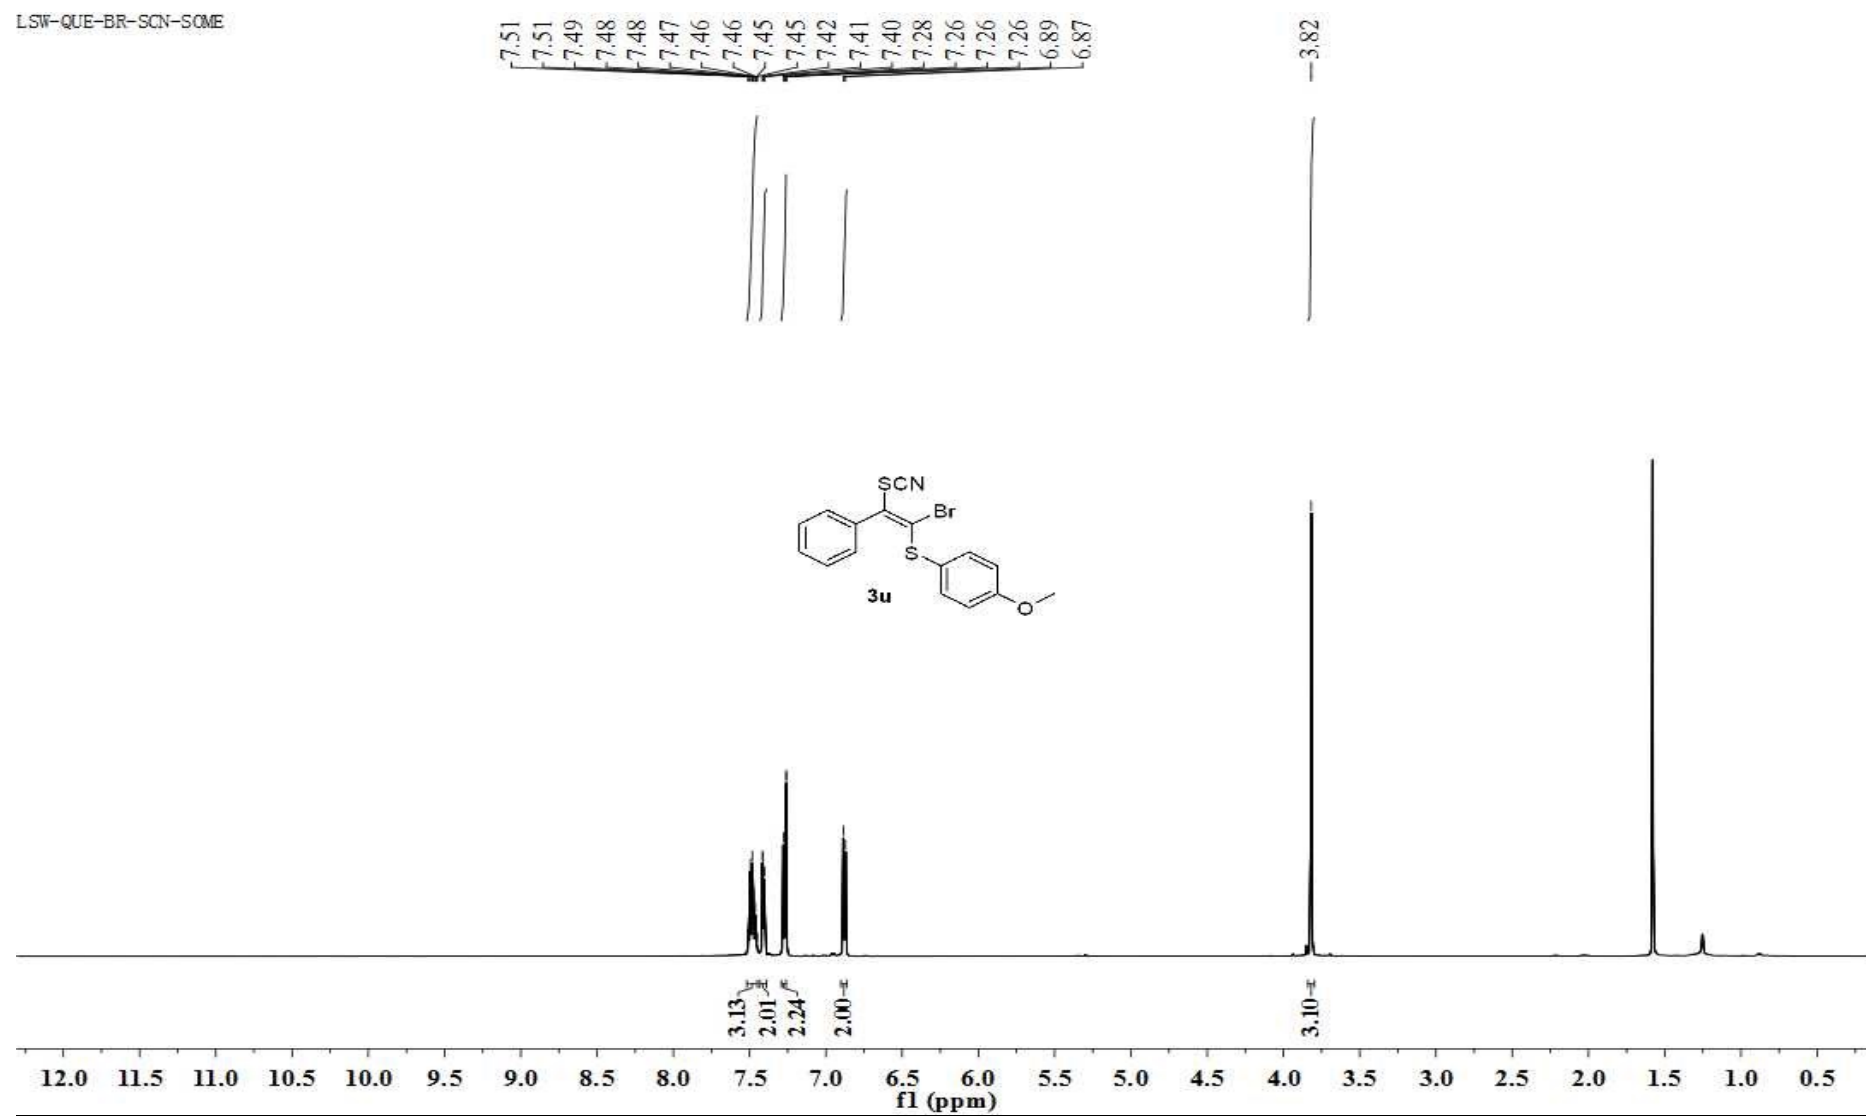

43.  $^{13}\text{C}$  NMR of **3u** (125 MHz,  $\text{CDCl}_3$ )

LSW-QUE-BR-SCN-SOME

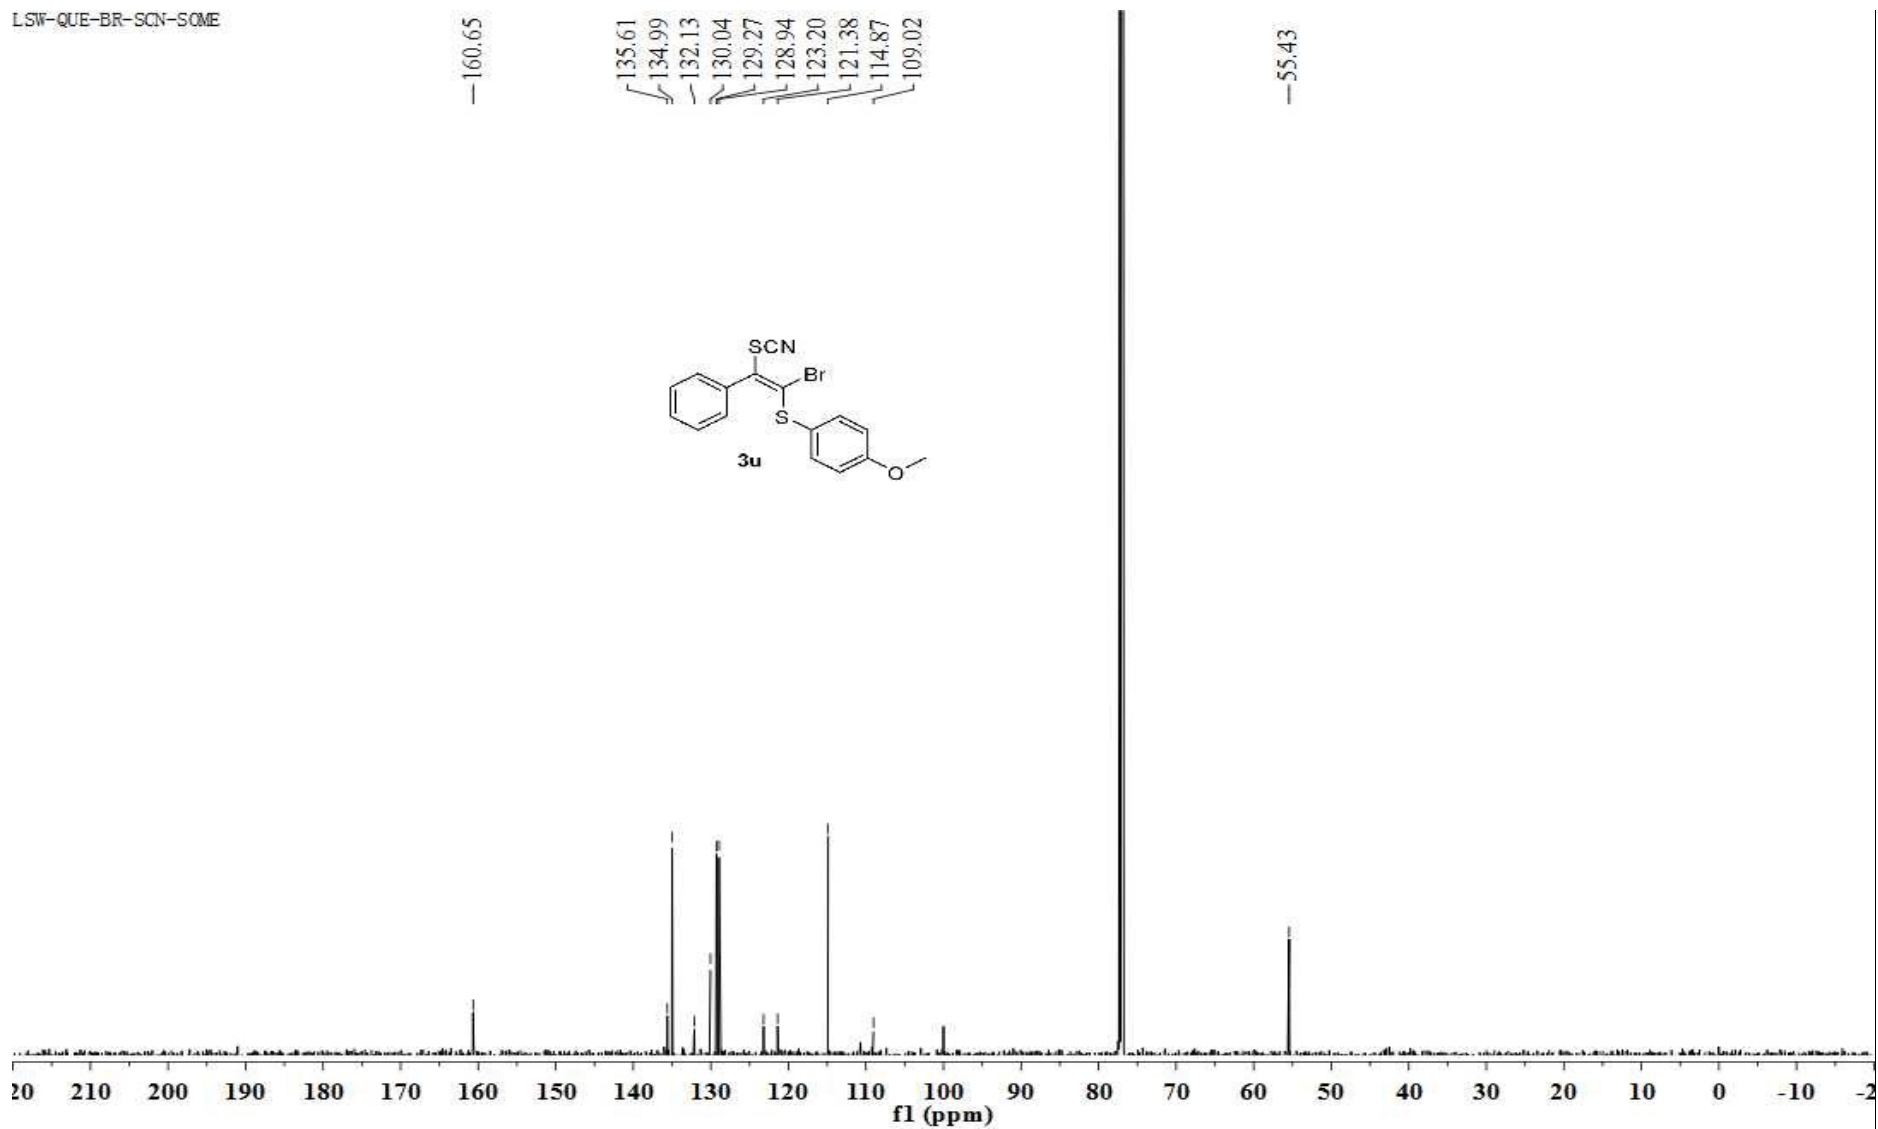

44. <sup>1</sup>H NMR of 3v (600 MHz, CDCl<sub>3</sub>)

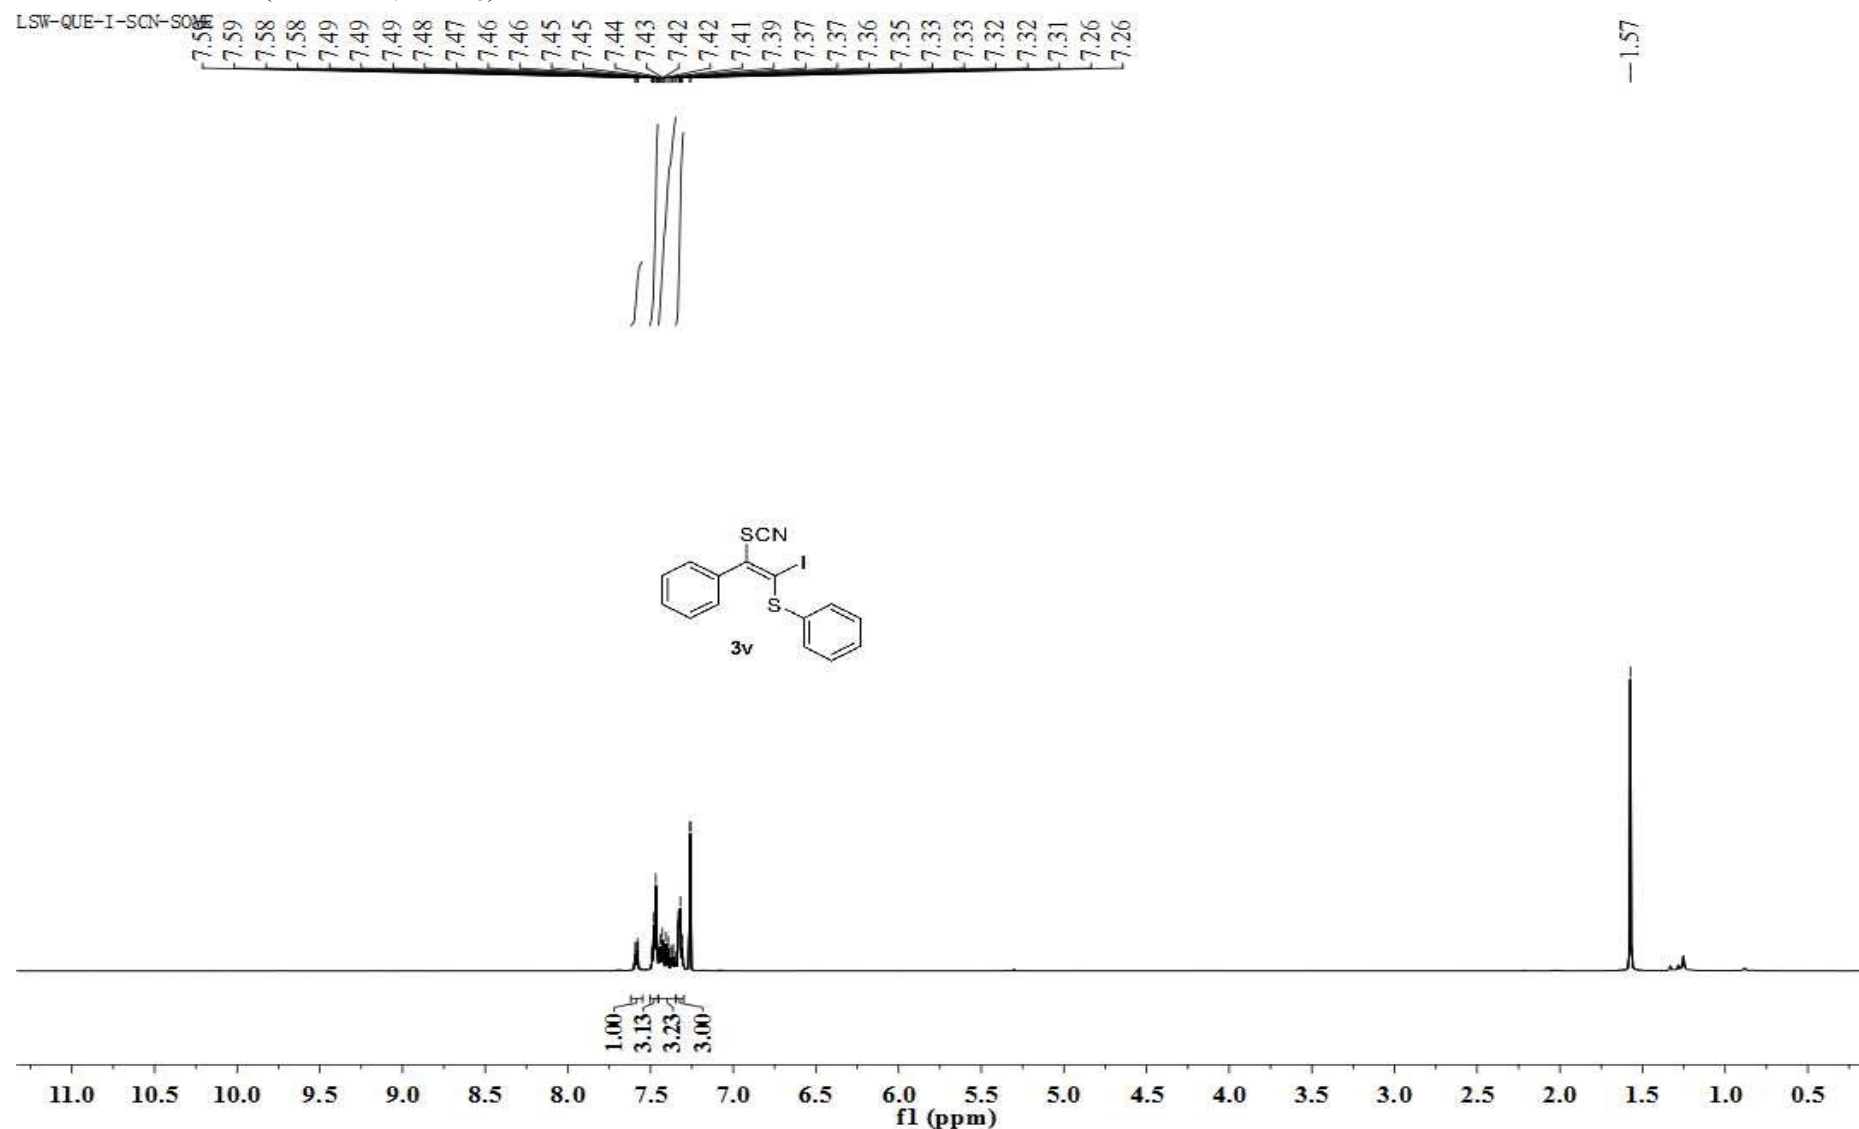

45.  $^{13}\text{C}$  NMR of **3v** (125 MHz,  $\text{CDCl}_3$ )

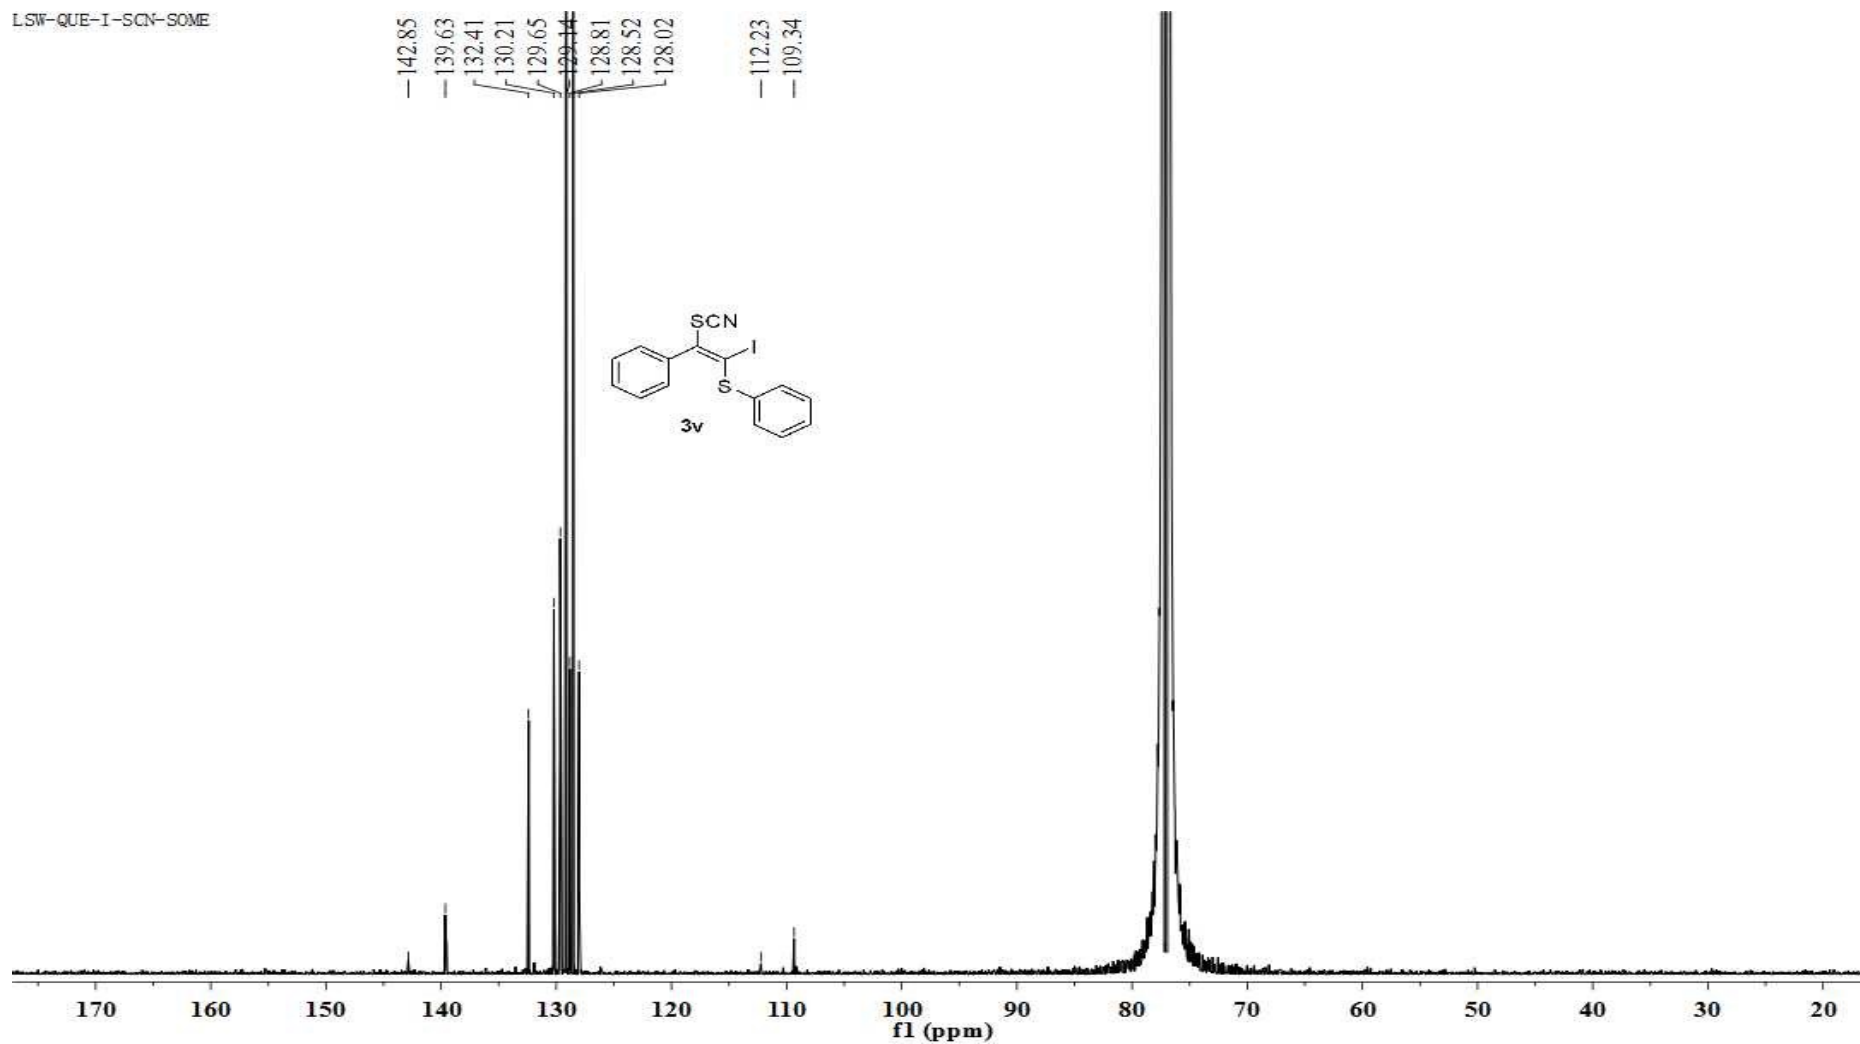

46. <sup>1</sup>H NMR of **3v** (600 MHz, CDCl<sub>3</sub>)

lsw-4br-me-oh-scn-some

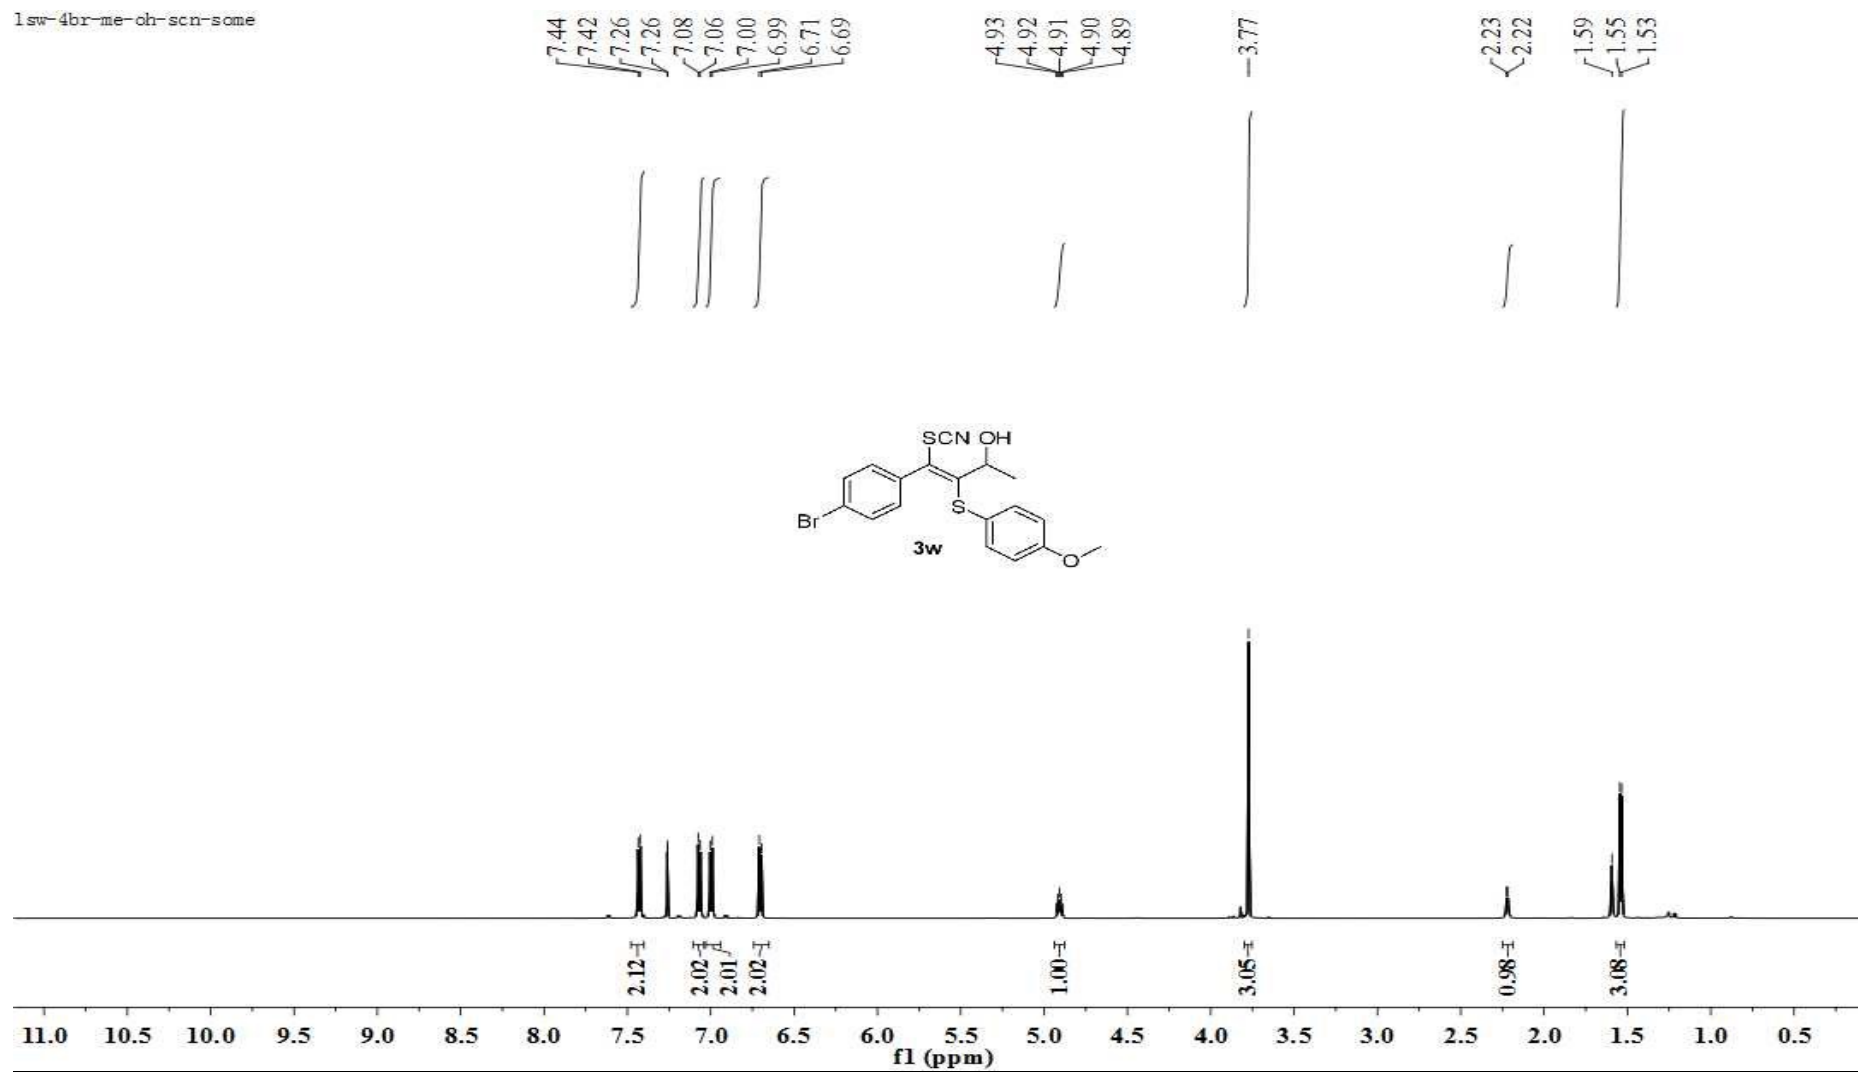

47. <sup>13</sup>C NMR of **3w** (125 MHz, CDCl<sub>3</sub>)

1sw-4br-me-oh-scn-some

— 159.73 — 147.73 — 136.23 — 133.99 — 131.67 — 131.15 — 123.94 — 123.53 — 123.29 — 114.78 — 109.70 — 69.85 — 55.44 — 21.70

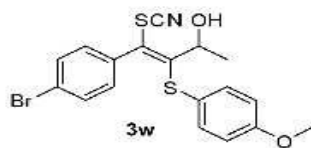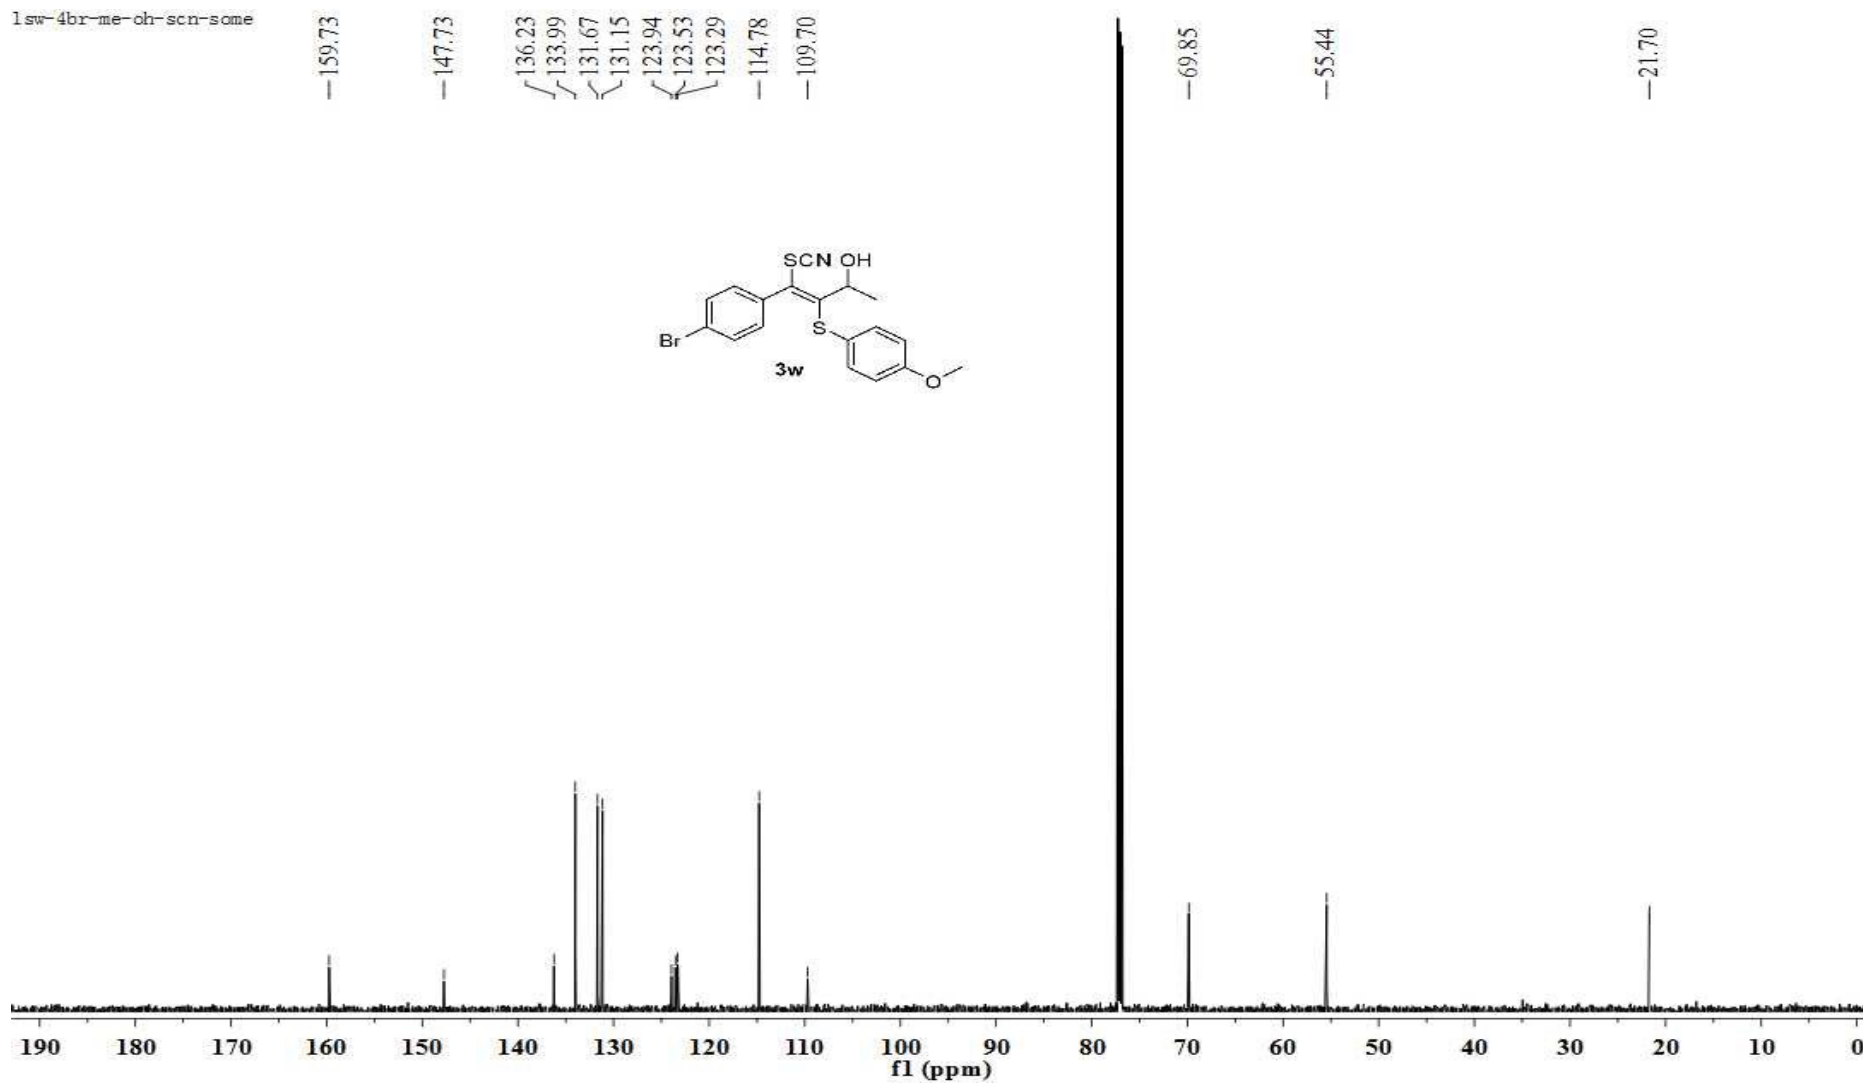

48 . <sup>1</sup>H NMR of **3x** (600 MHz, CDCl<sub>3</sub>)

lsw-nai-scn-SOME

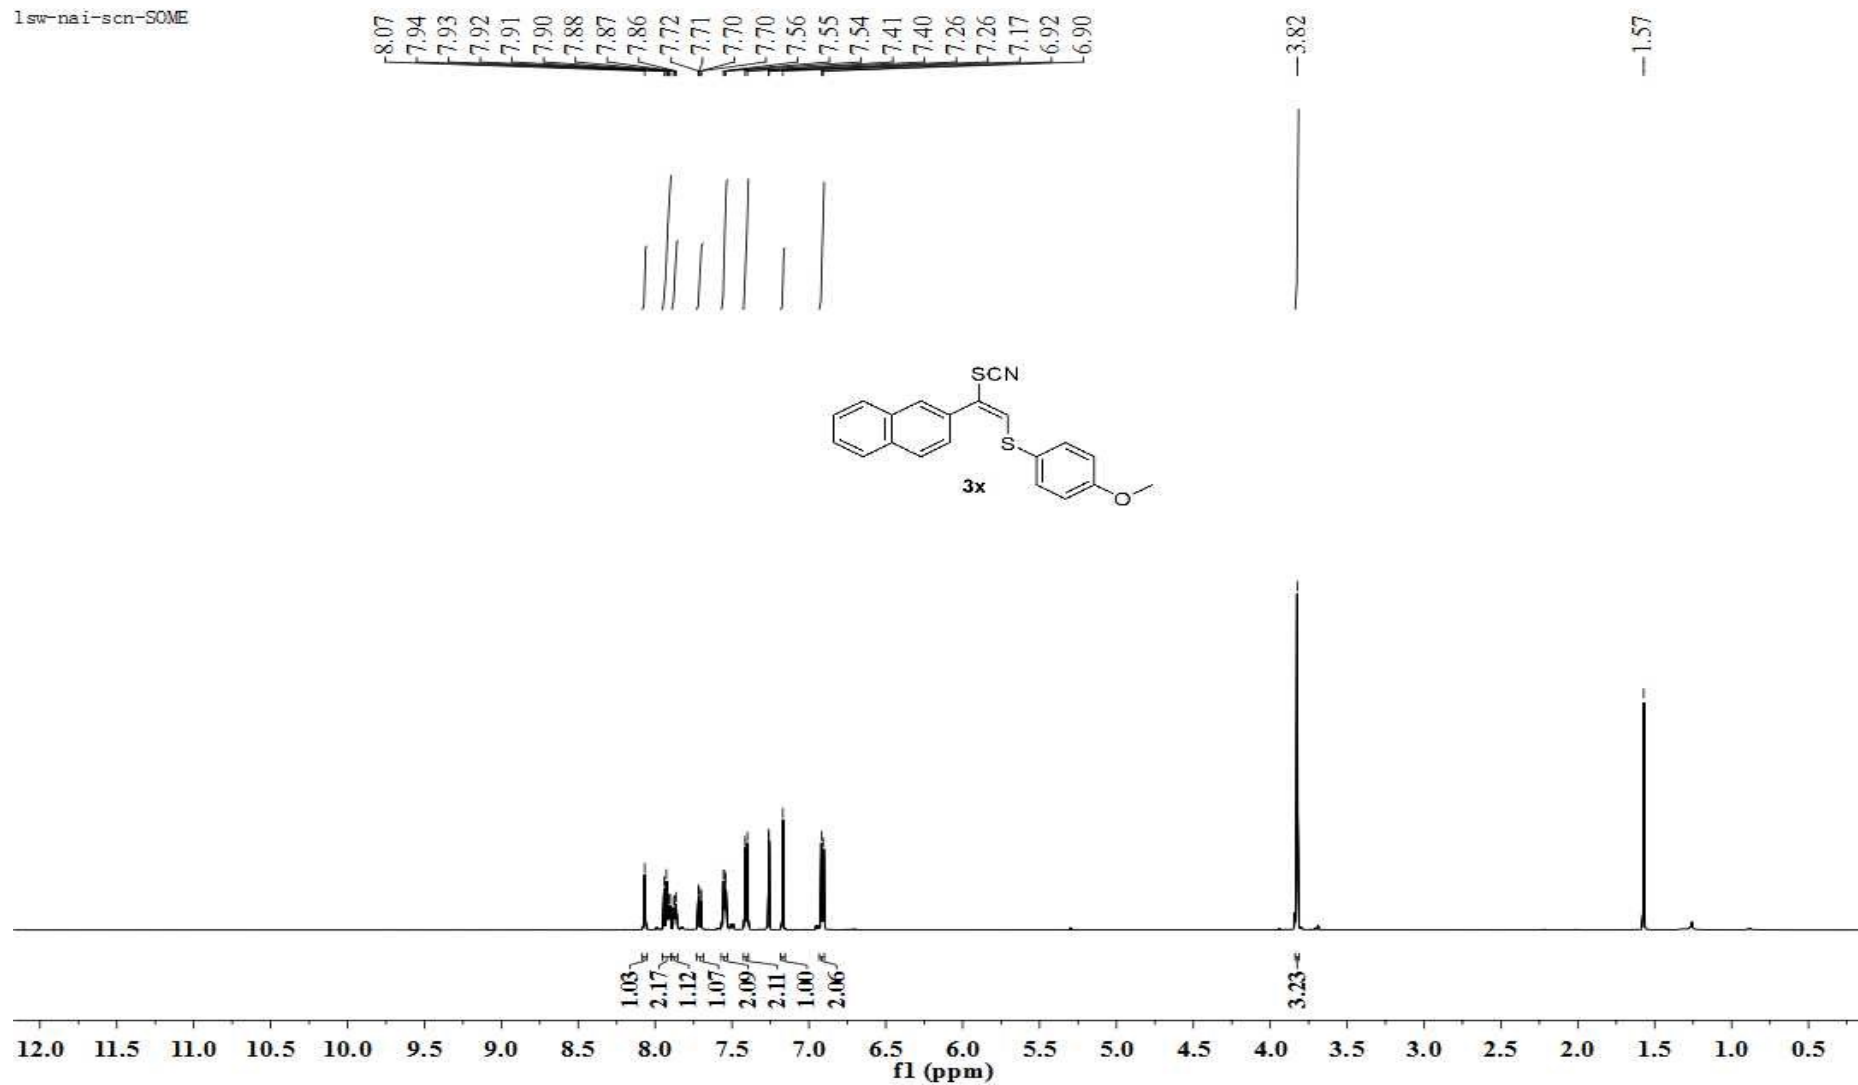

49.  $^{13}\text{C}$  NMR of **3x** (125 MHz,  $\text{CDCl}_3$ )

lsw-nai-scN-SOME

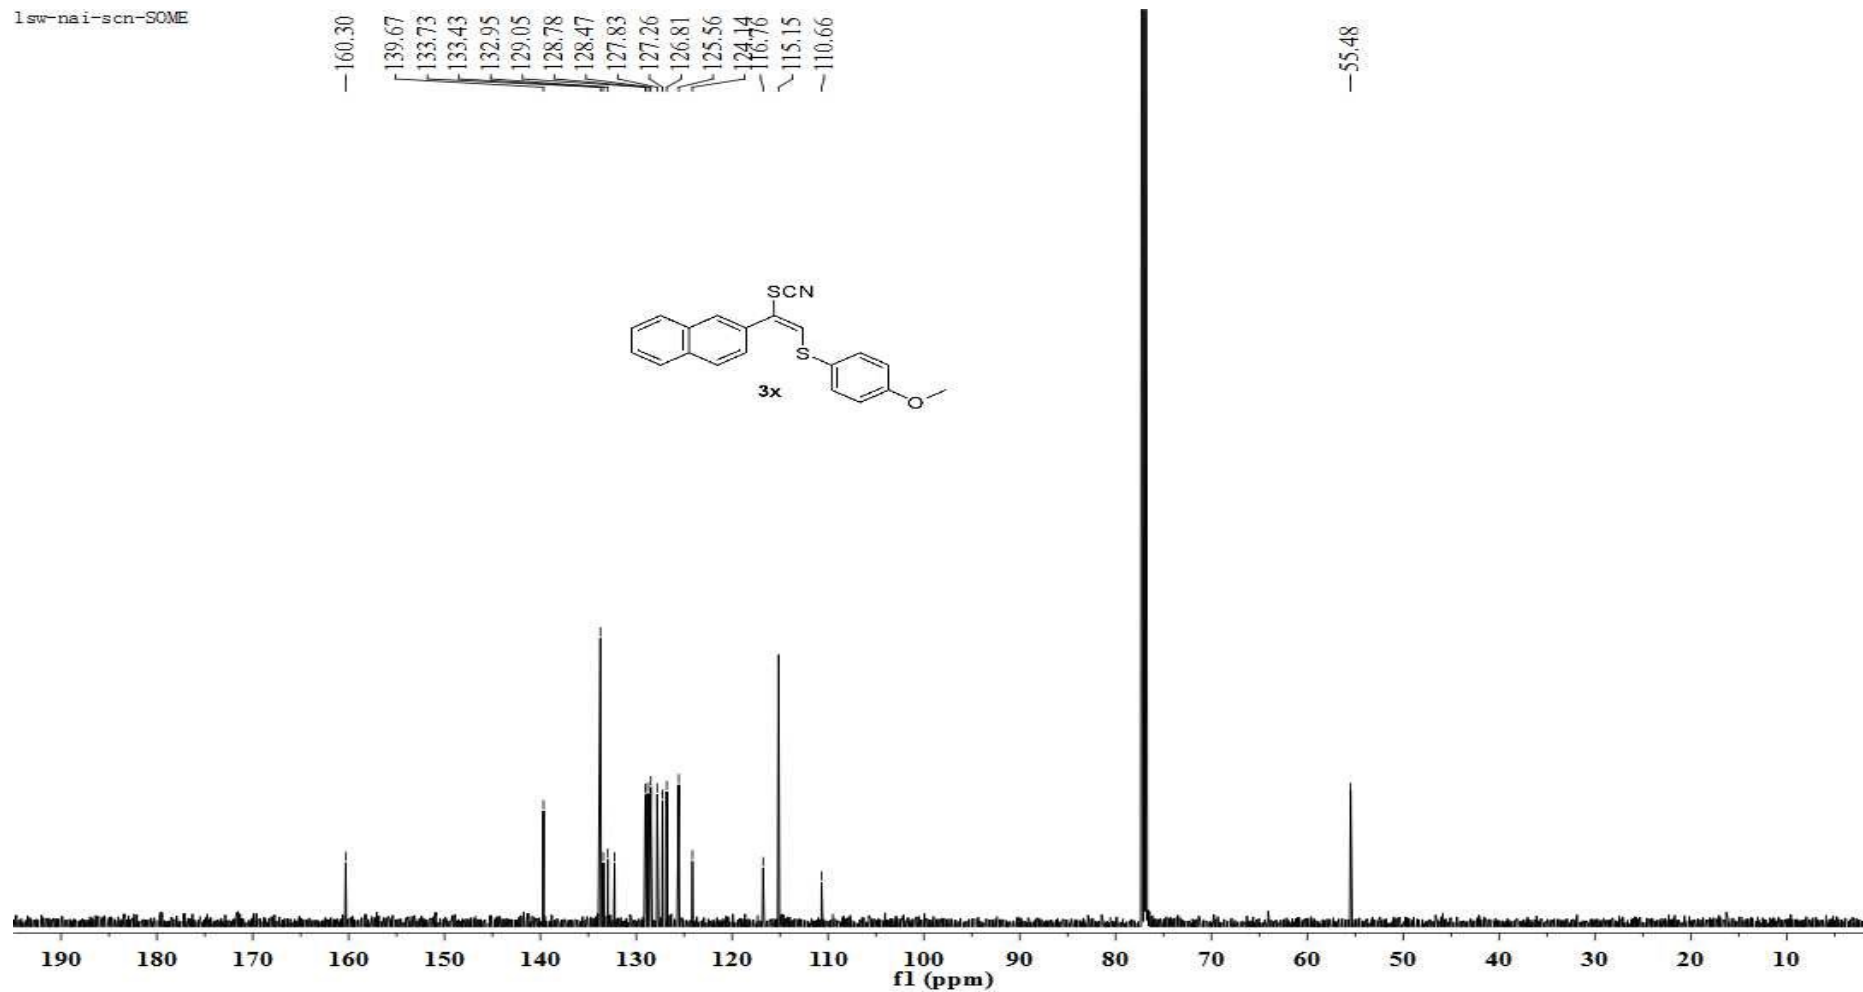



50. <sup>1</sup>H NMR of **3y** (600 MHz, CDCl<sub>3</sub>)

LSW-INDOLE-SCN-SOME

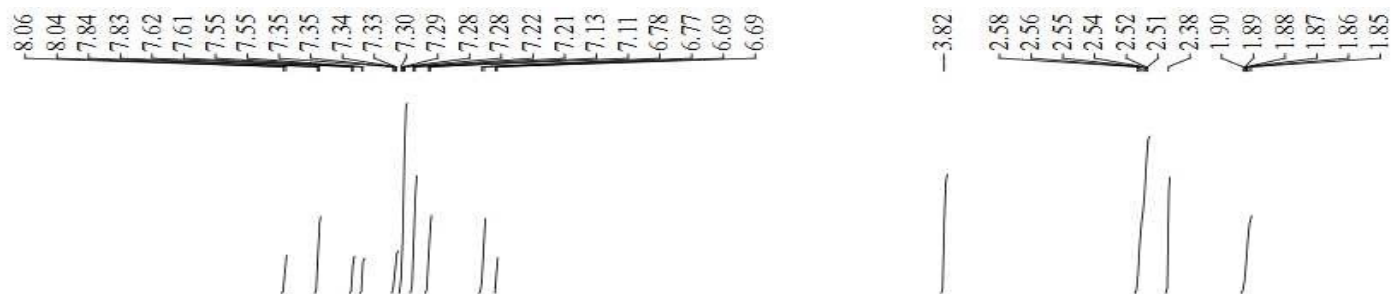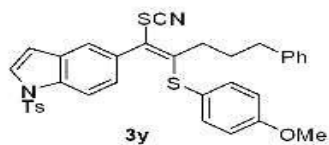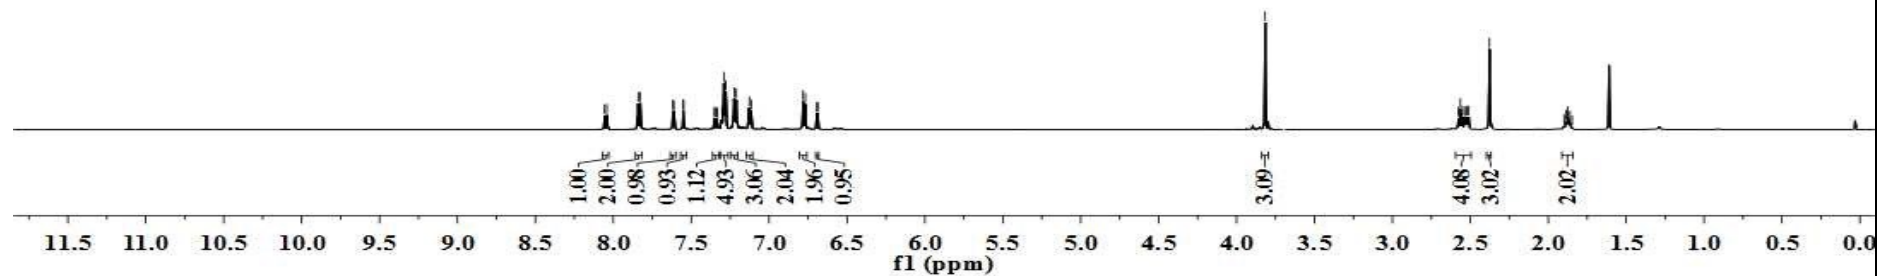

51. <sup>13</sup>C NMR of **3y** (125 MHz, CDCl<sub>3</sub>)

LSW-INDOLE-SCN-SOME

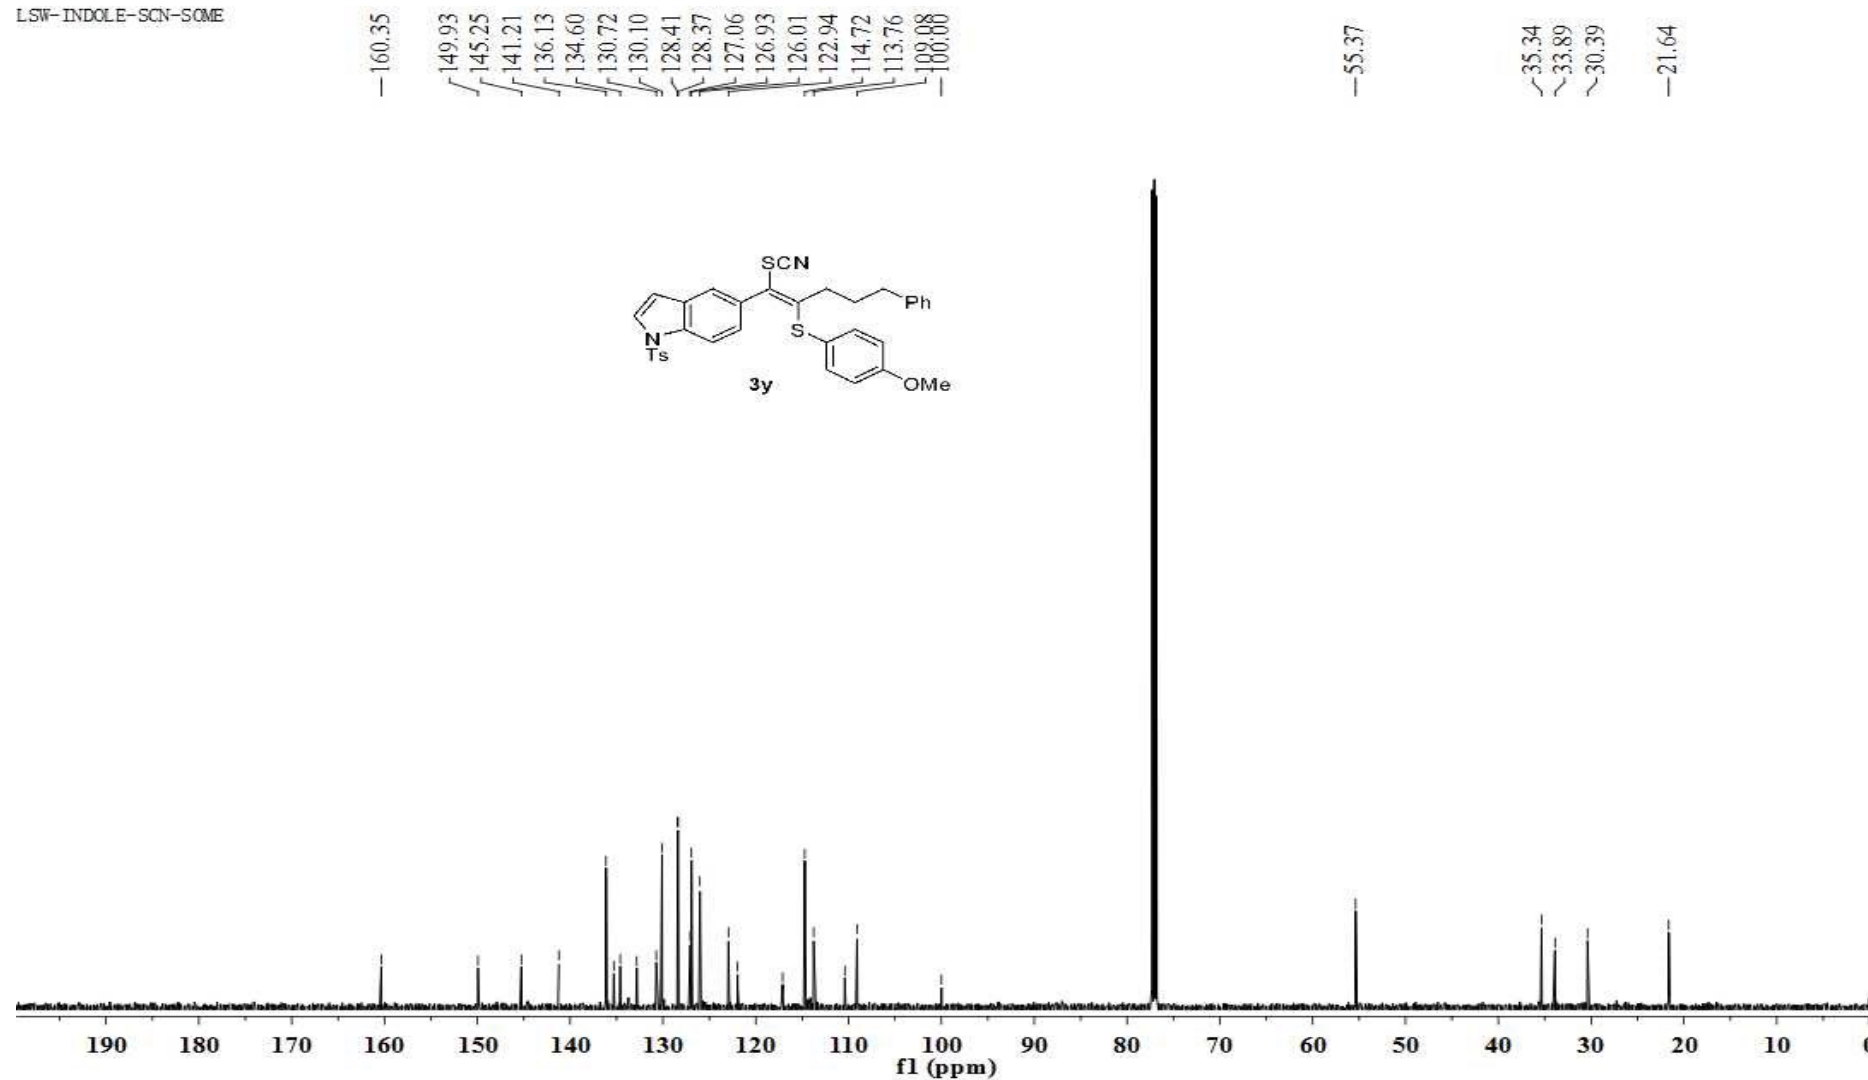

52. <sup>1</sup>H NMR of **3z** (600 MHz, CDCl<sub>3</sub>)

LSW-GLY-SCN-SOME

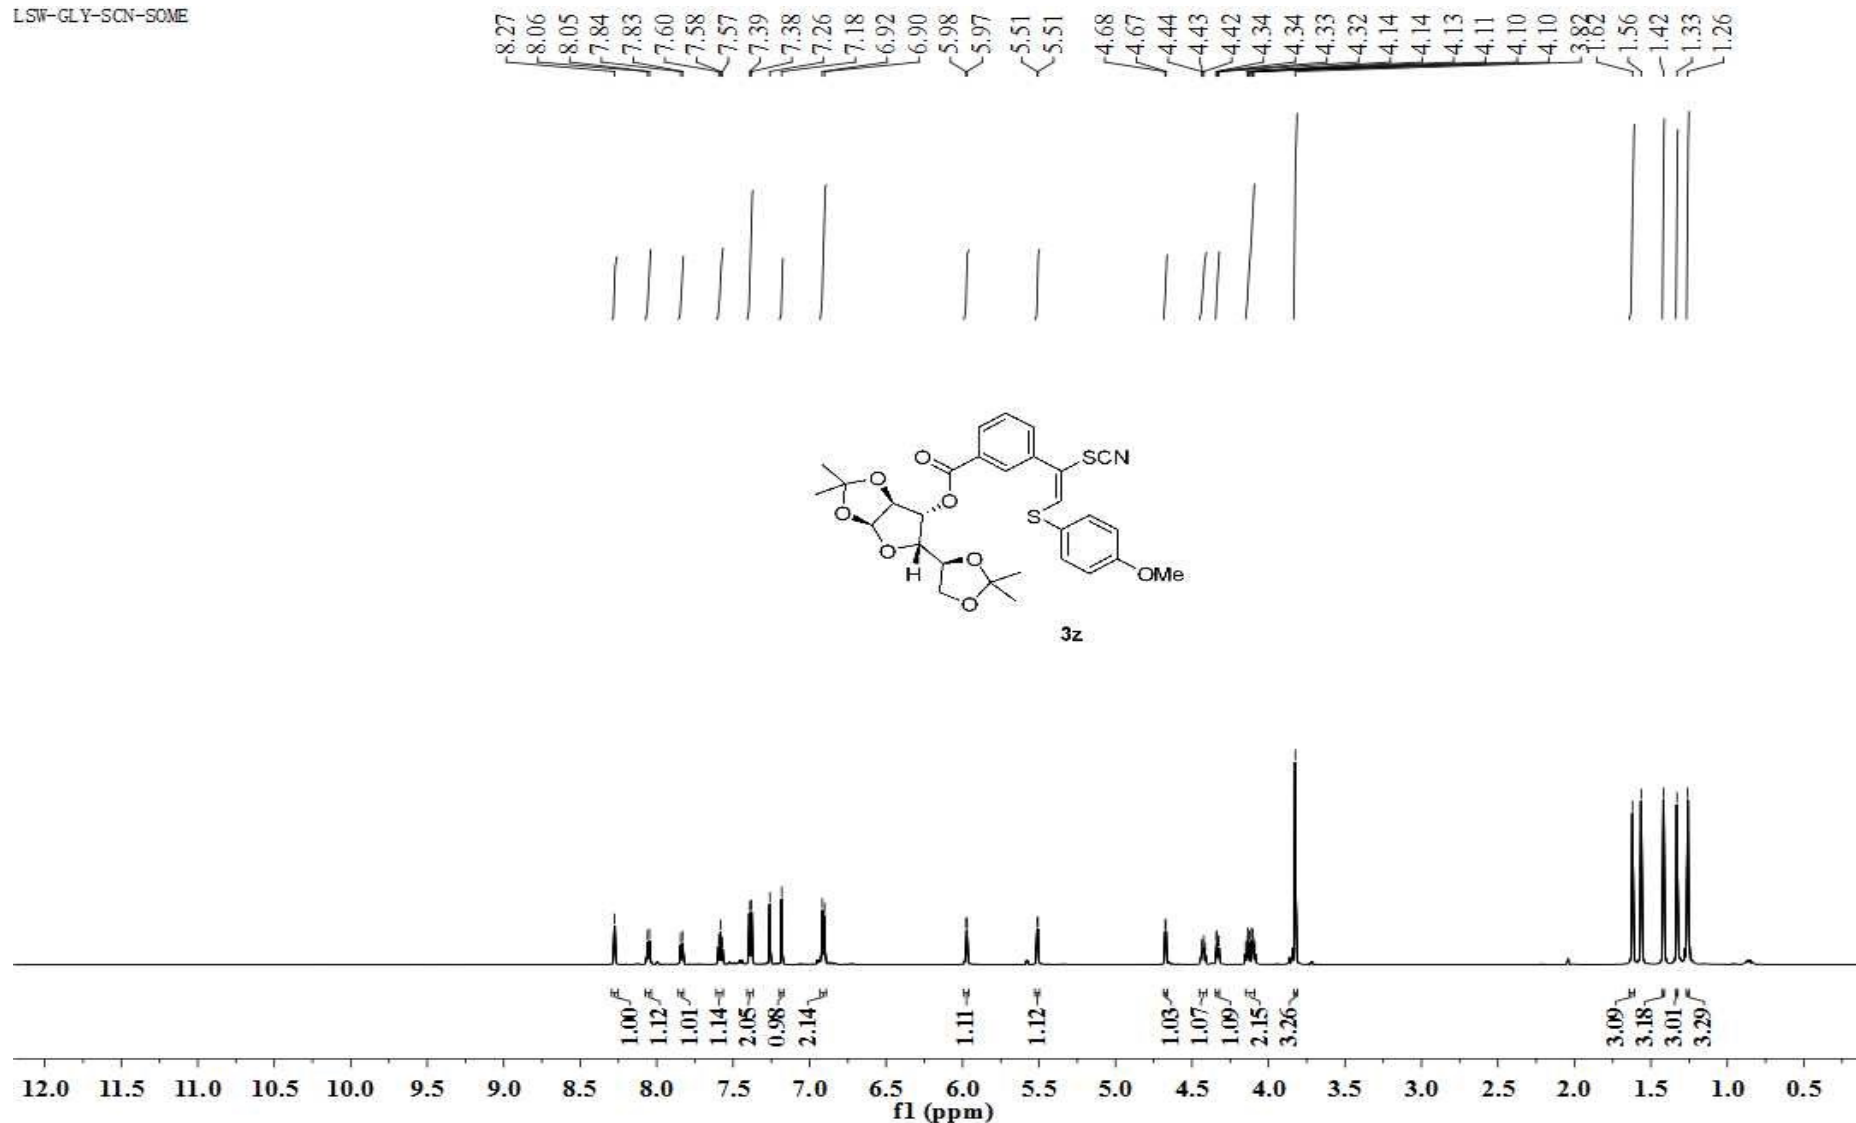

53.  $^{13}\text{C}$  NMR of **3z** (125 MHz,  $\text{CDCl}_3$ )

LSW-GLY-SCN-SOME

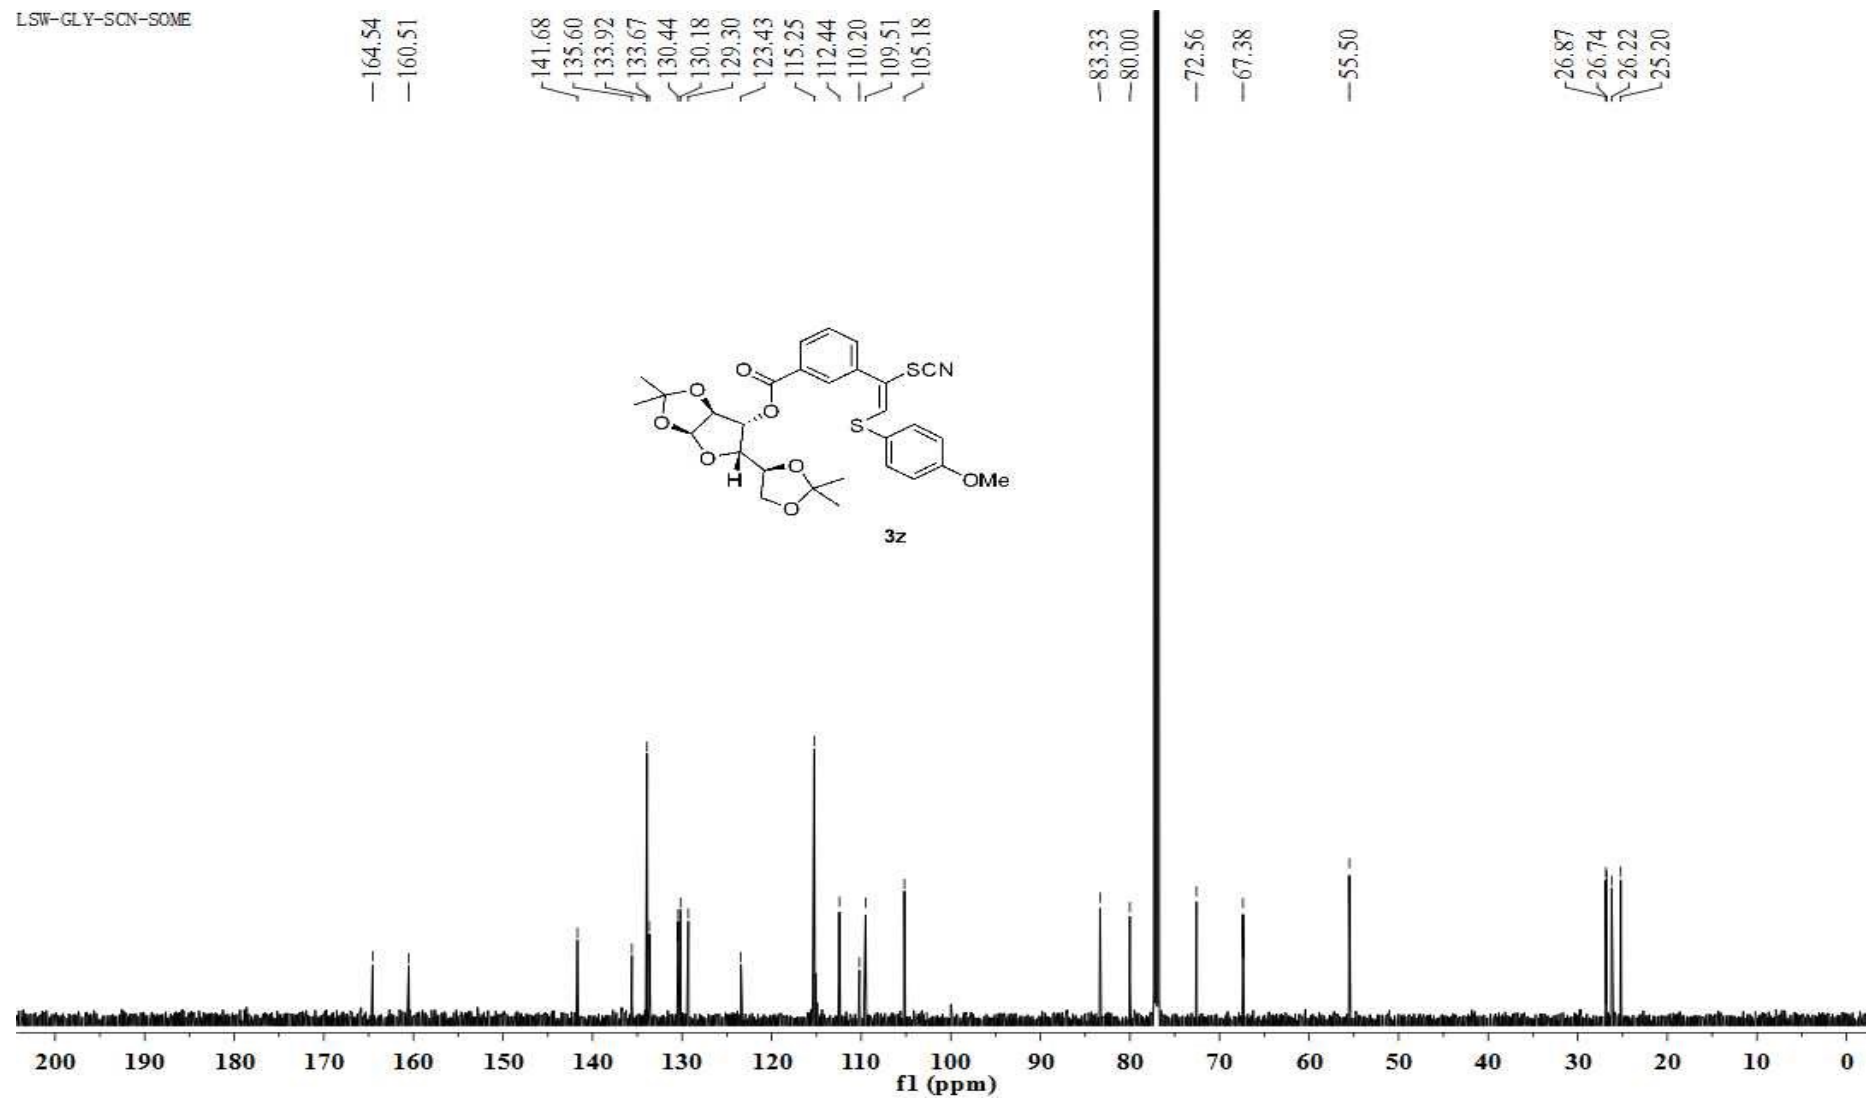

54. <sup>1</sup>H NMR of **3aa** (600 MHz, CDCl<sub>3</sub>)

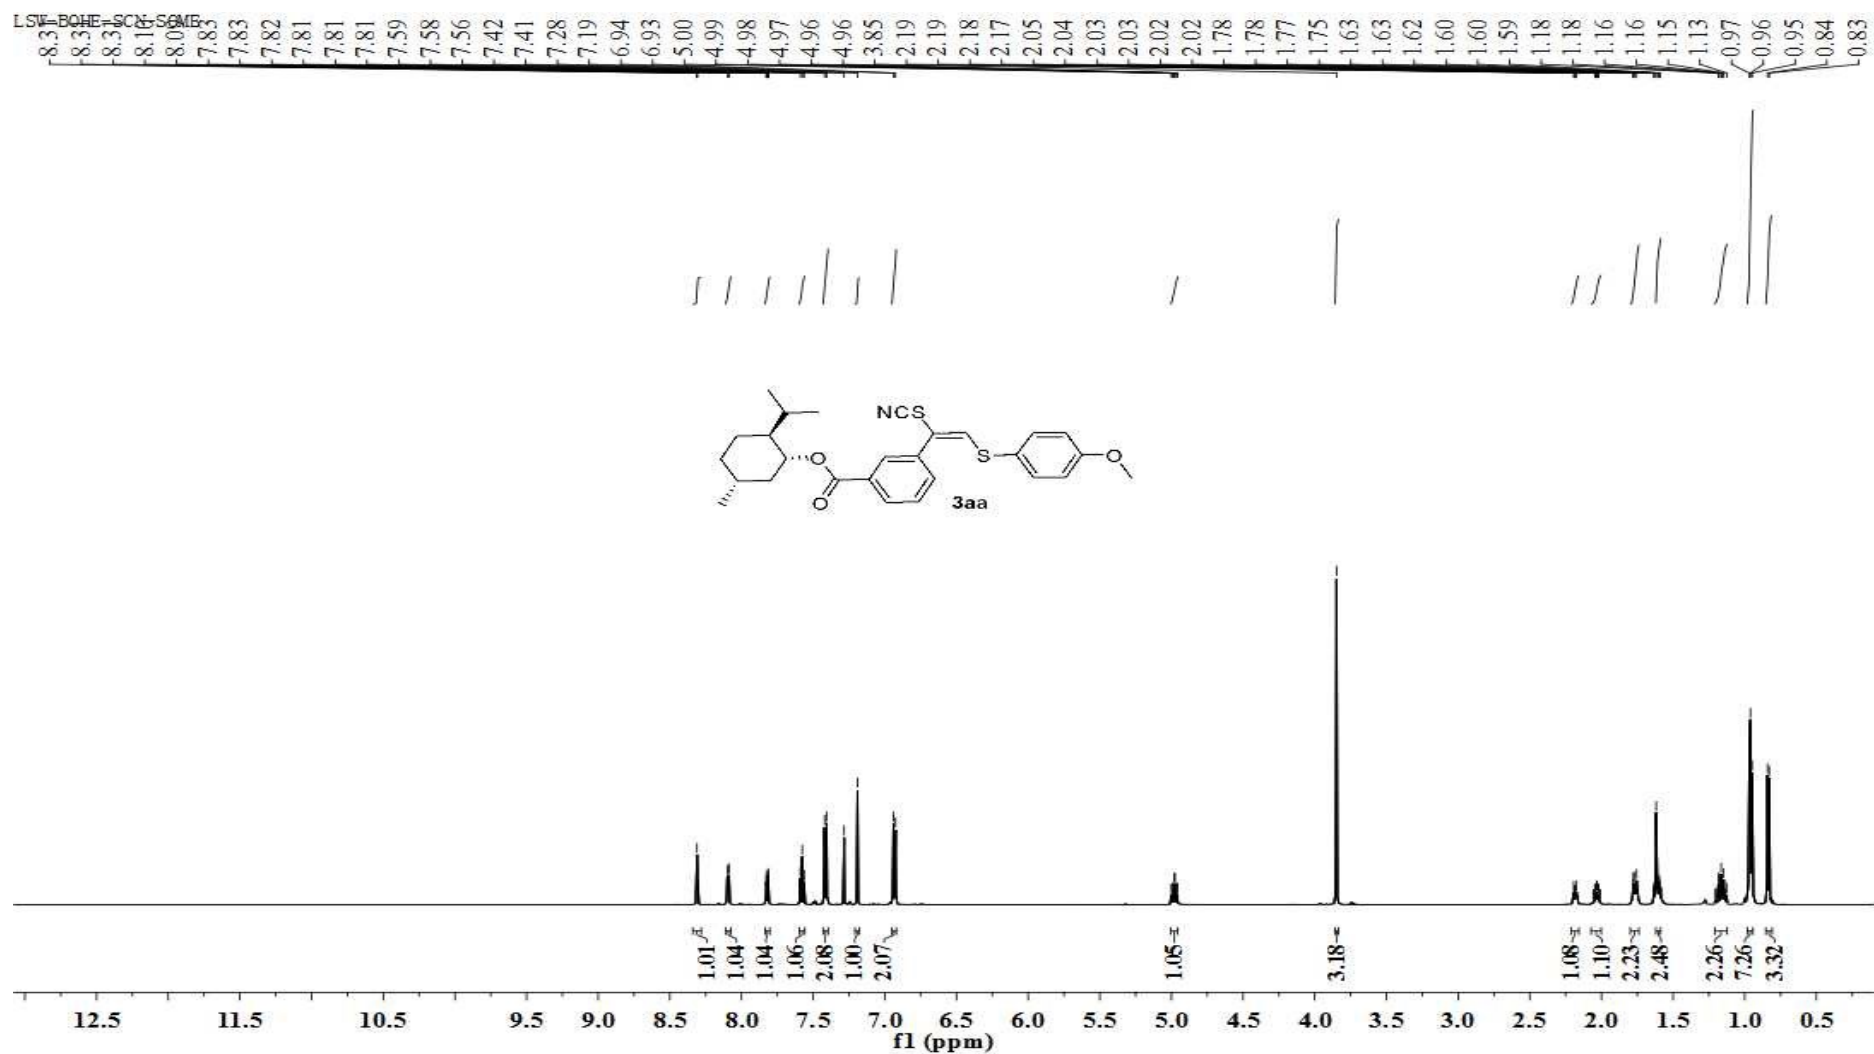

55. <sup>13</sup>C NMR of **3aa** (125 MHz, CDCl<sub>3</sub>)

LSW-BOHE-SCN-SOME

-165.34  
 -160.41  
 141.04  
 135.25  
 133.85  
 132.93  
 131.57  
 130.36  
 130.04  
 128.98  
 123.77  
 115.50  
 115.19  
 110.36  
 -75.36  
 -55.49  
 47.26  
 40.92  
 34.31  
 31.48  
 26.52  
 23.63  
 22.08  
 20.84  
 16.57

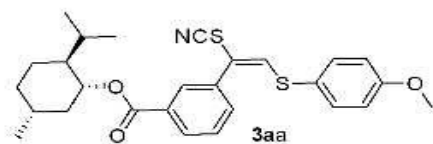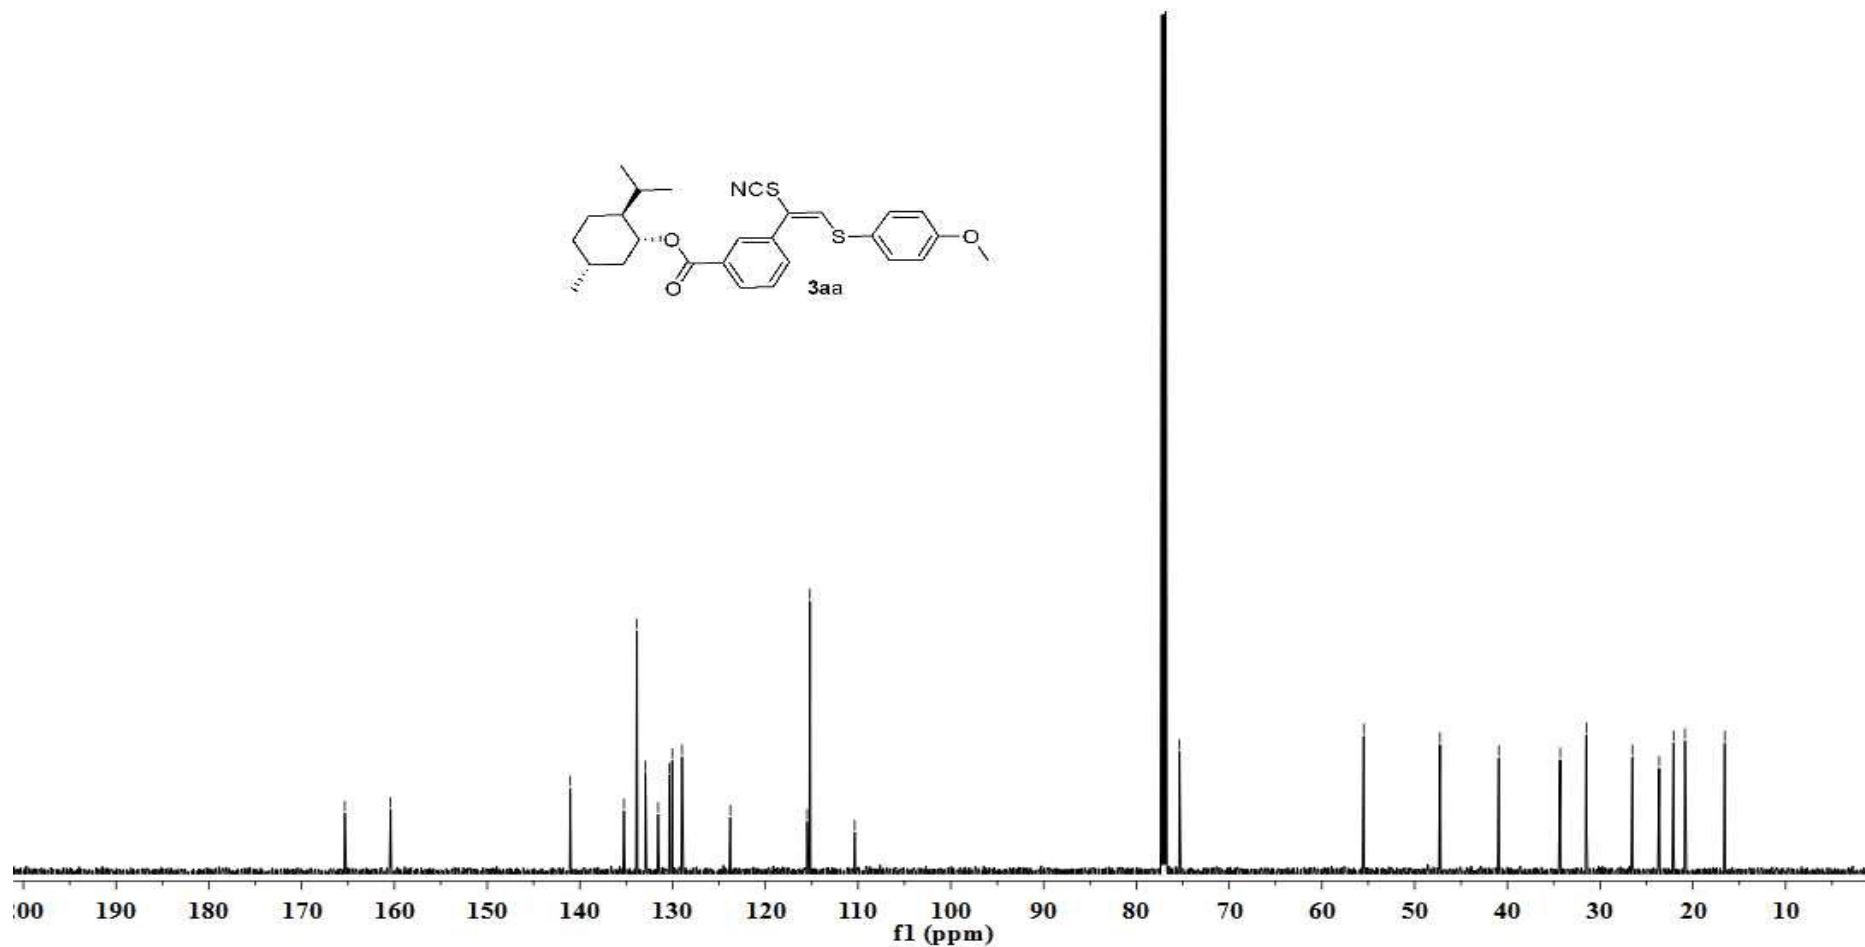

56. <sup>1</sup>H NMR of **3ab** (600 MHz, CDCl<sub>3</sub>)

LSW-ZHA-SCN-SOME

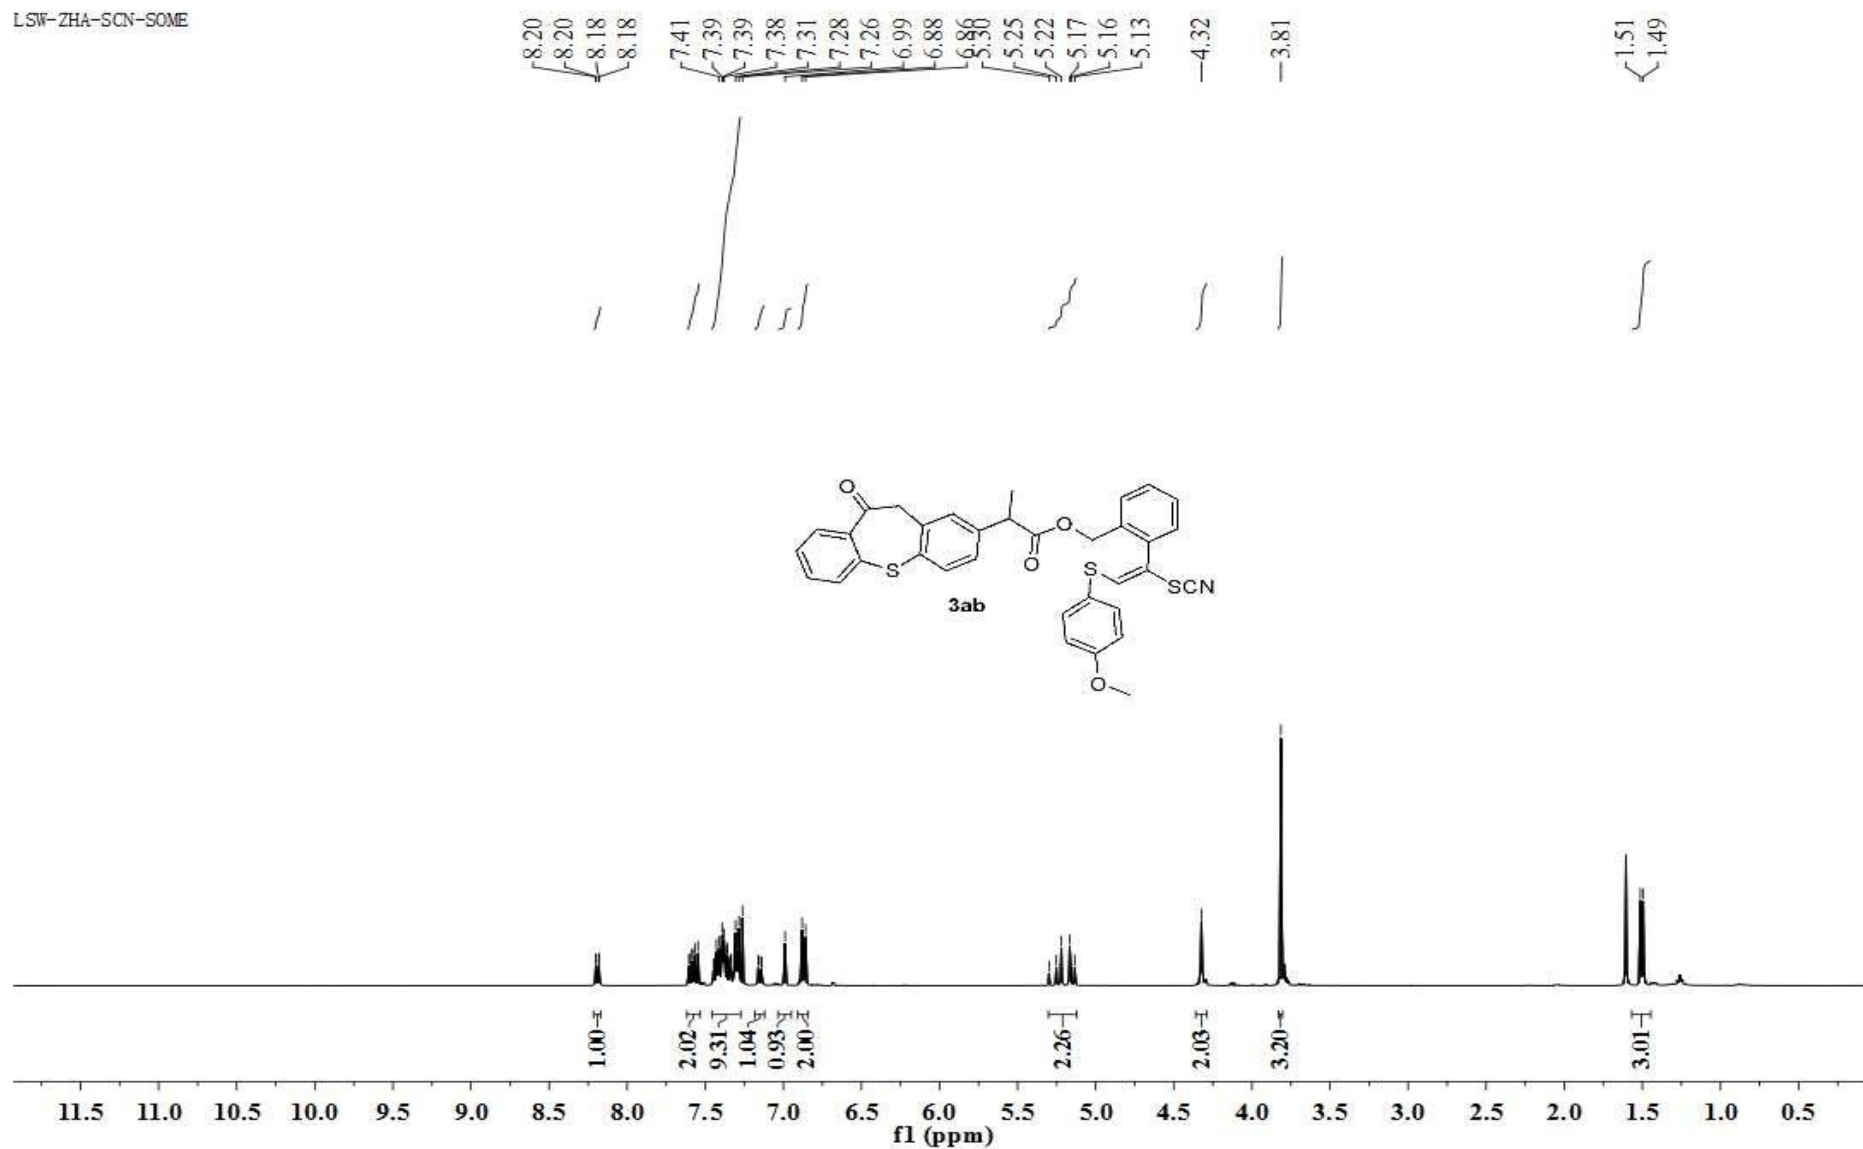

57. <sup>13</sup>C NMR of **3ab** (125 MHz, CDCl<sub>3</sub>)

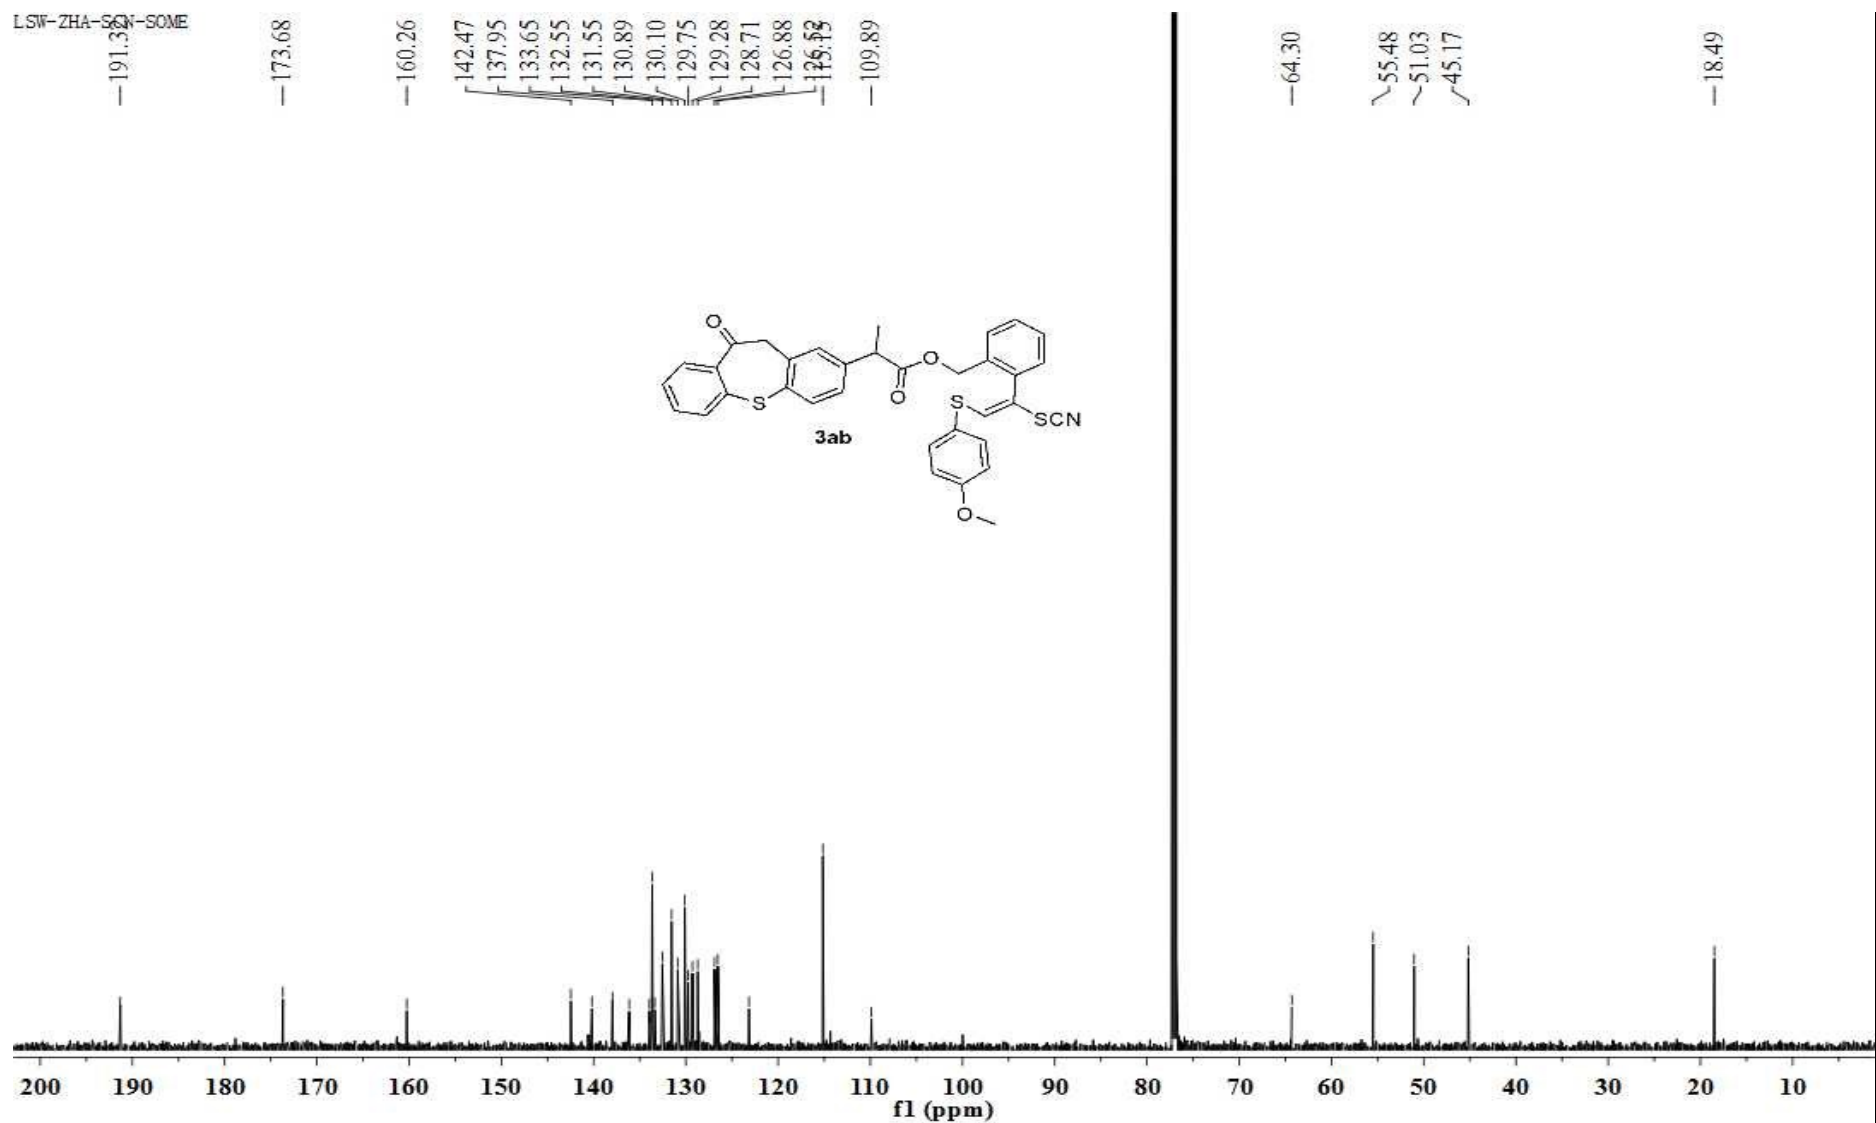



58. <sup>1</sup>H NMR of **3ac** (600 MHz, CDCl<sub>3</sub>)

LSW-4-BR-SCN-SFH

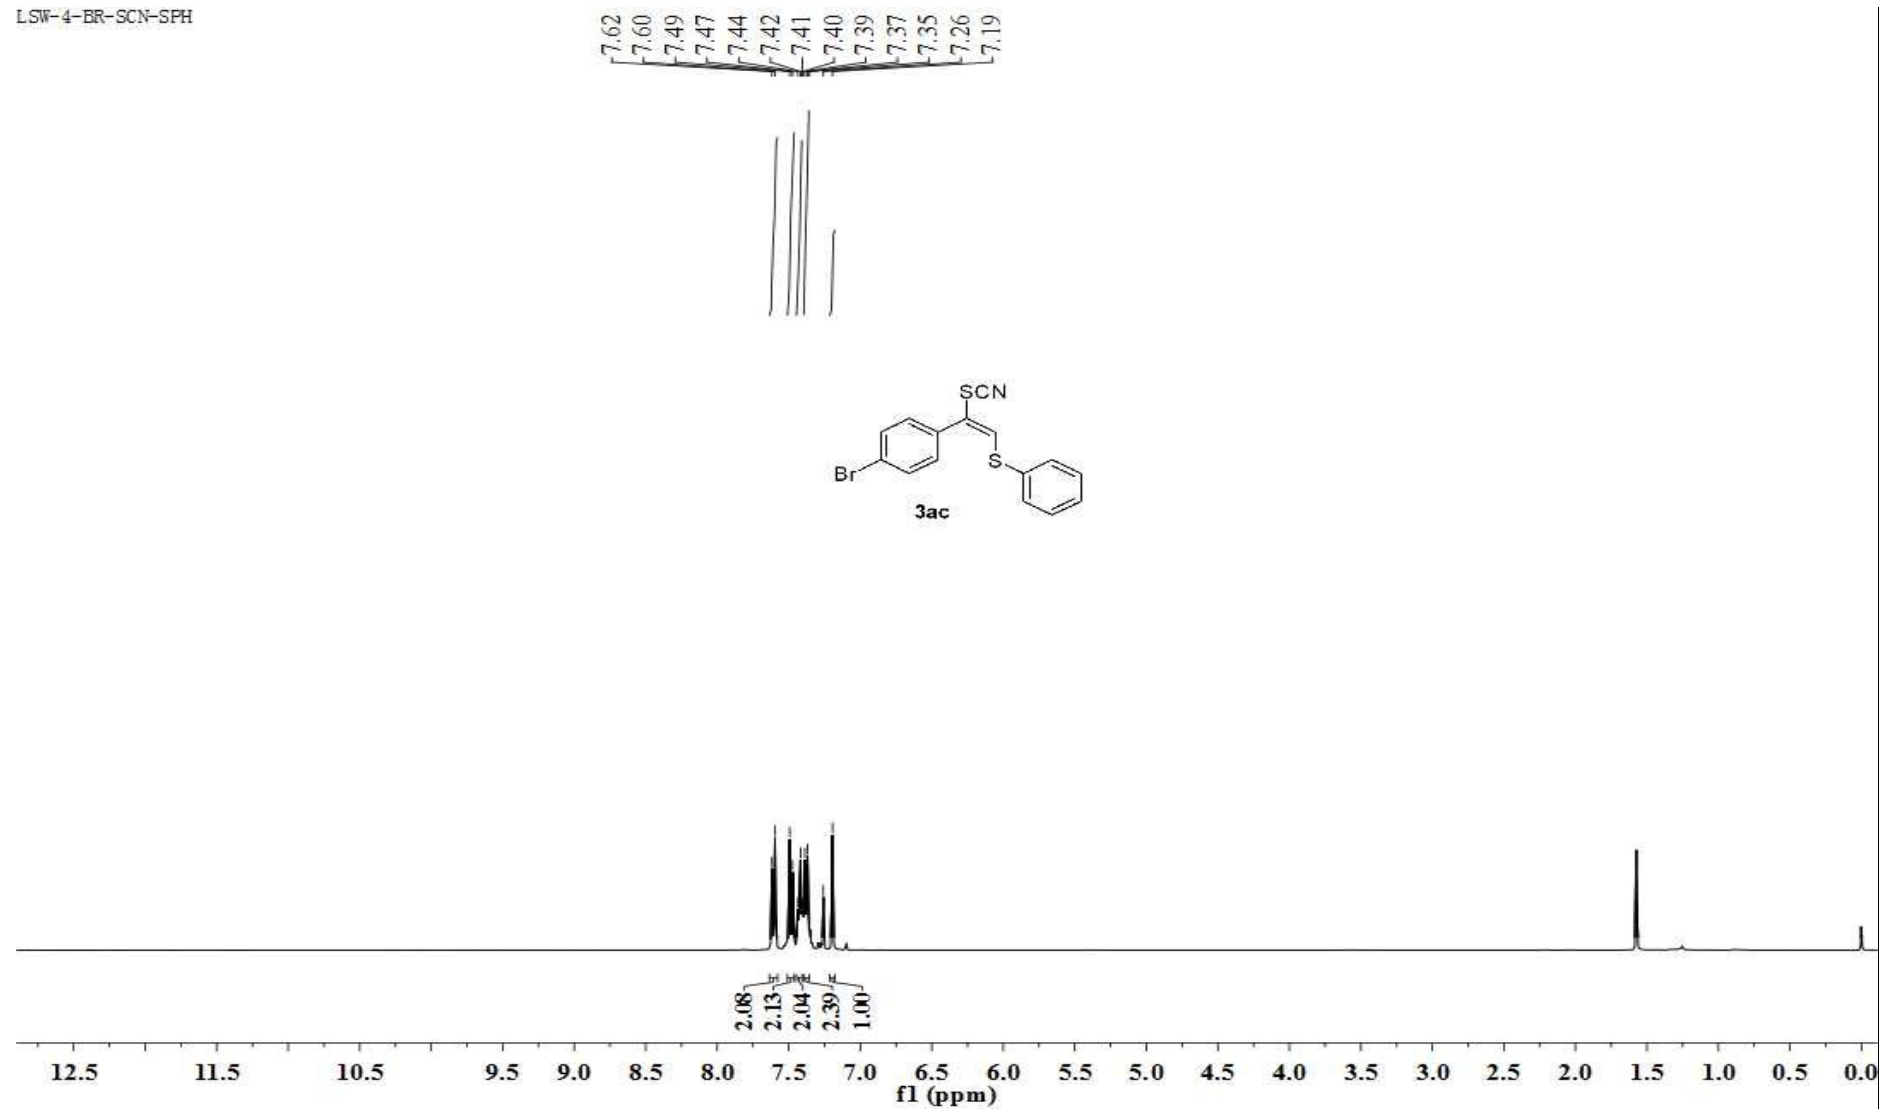

59.  $^{13}\text{C}$  NMR of **3z** (600 MHz,  $\text{CDCl}_3$ )

LSW-4-BR-SCN-SPH

138.08  
133.72  
133.34  
132.17  
130.99  
130.48  
129.66  
128.63  
123.80  
117.13  
110.13

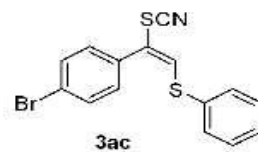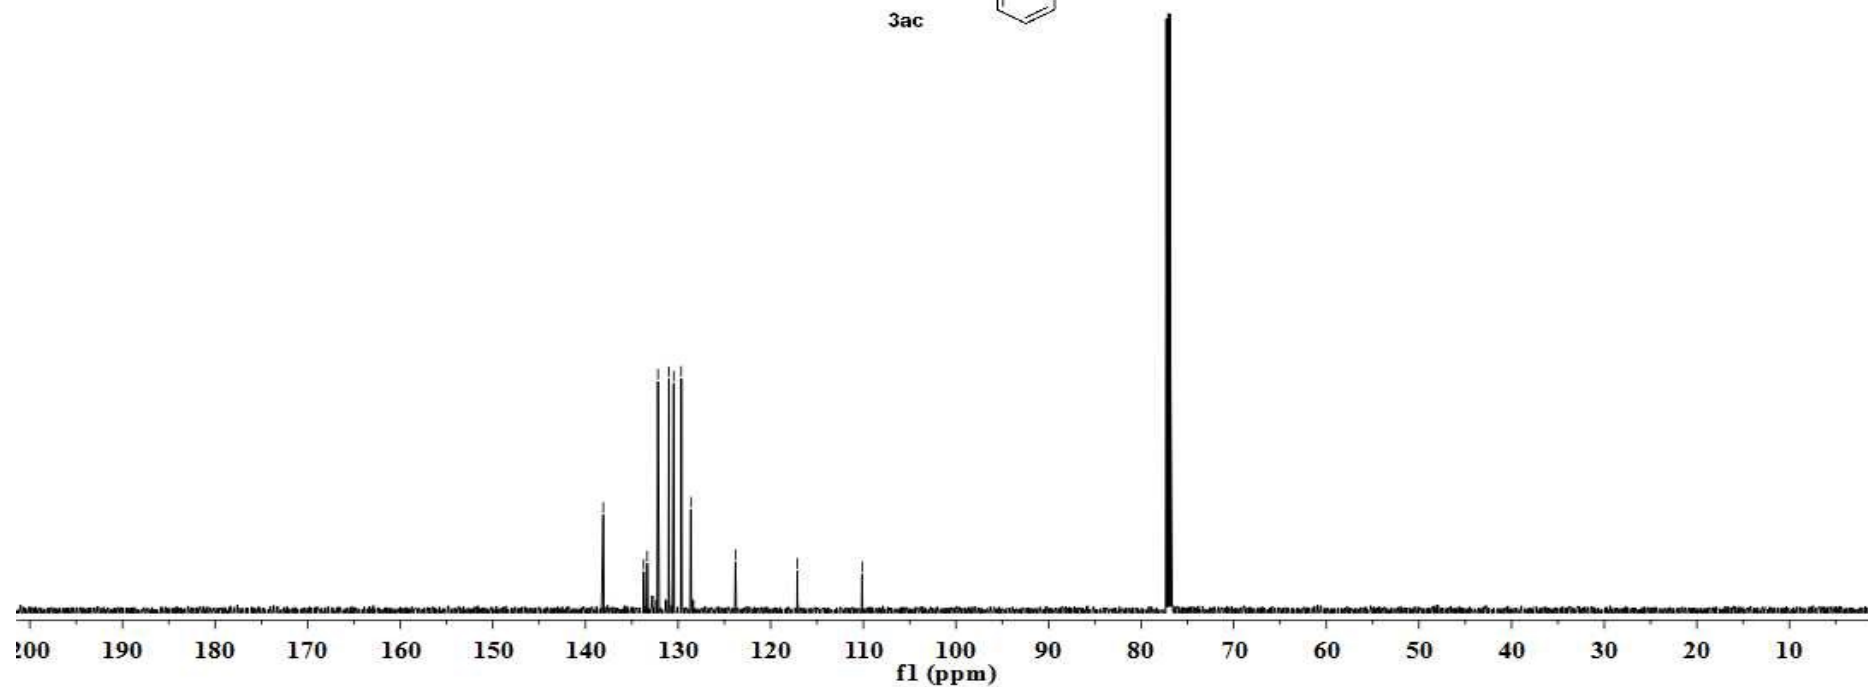

60. <sup>1</sup>H NMR of **3ad** (600 MHz, CDCl<sub>3</sub>)

LSW-4BR-SCN-S-2F

7.65  
7.63  
7.52  
7.50  
7.48  
7.48  
7.47  
7.46  
7.45  
7.45  
7.42  
7.42  
7.41  
7.41  
7.41  
7.40  
7.40  
7.40  
7.40  
7.39  
7.39  
7.38  
7.29  
7.22  
7.22  
7.20  
7.20  
7.19  
7.19  
7.18  
7.16  
7.16  
7.09

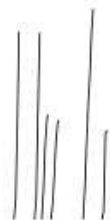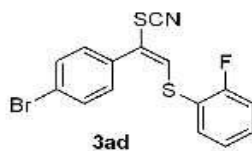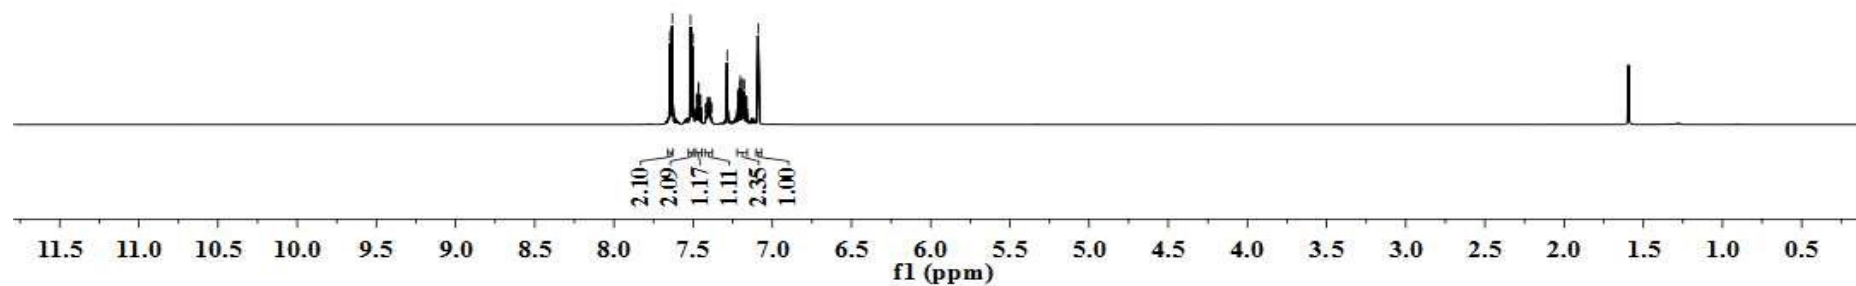

61.  $^{13}\text{C}$  NMR of **3ad** (125 MHz,  $\text{CDCl}_3$ )

LSW-4BR-SCN-S-2F

162.04  
160.39  
138.18  
135.88  
133.55  
133.38  
132.26  
131.18  
131.13  
130.54  
125.17  
125.15  
124.01  
118.44  
116.59  
116.45  
109.89

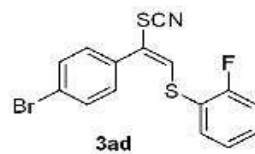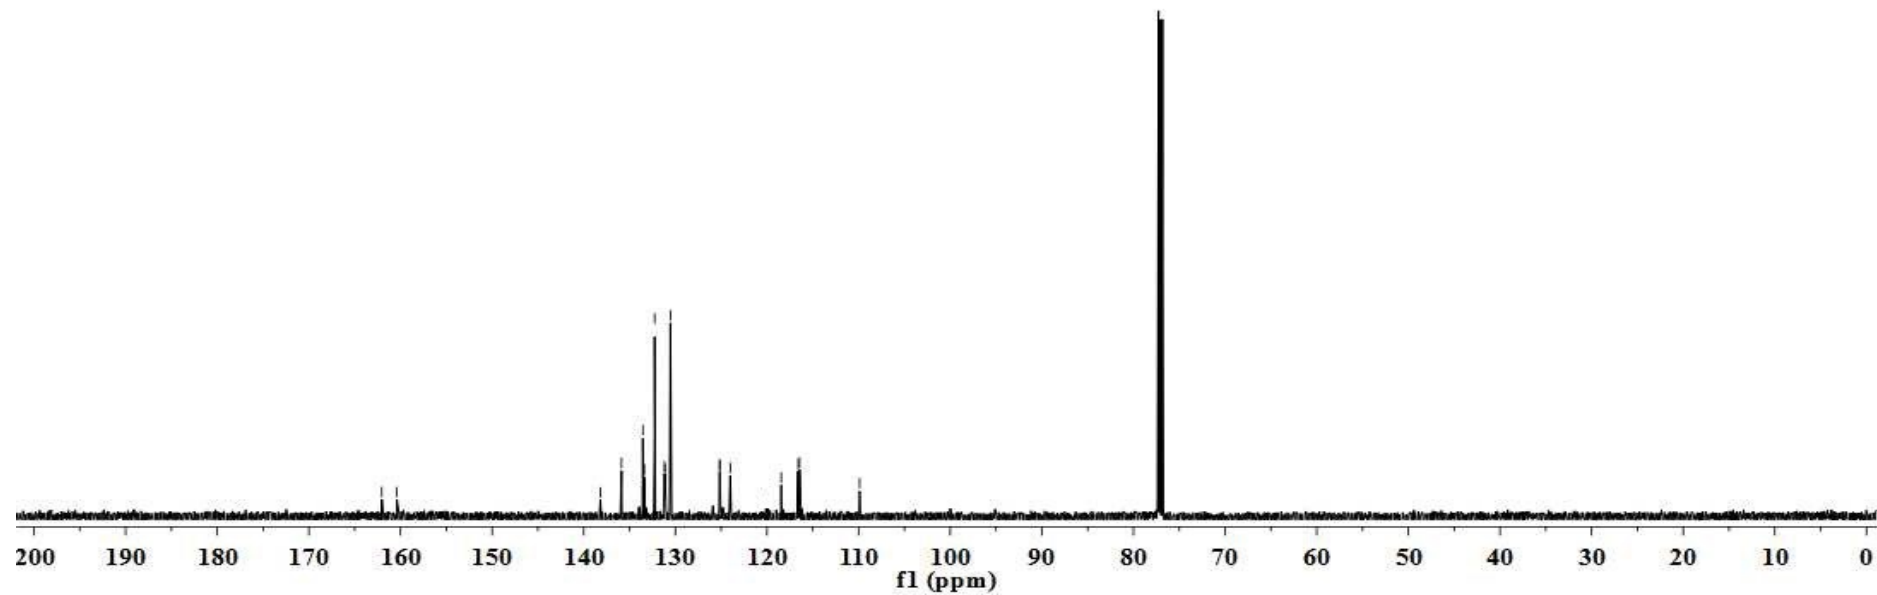

62. <sup>1</sup>H NMR of **3ae** (600 MHz, CDCl<sub>3</sub>)

LSW-4BR-SCN-S-4F

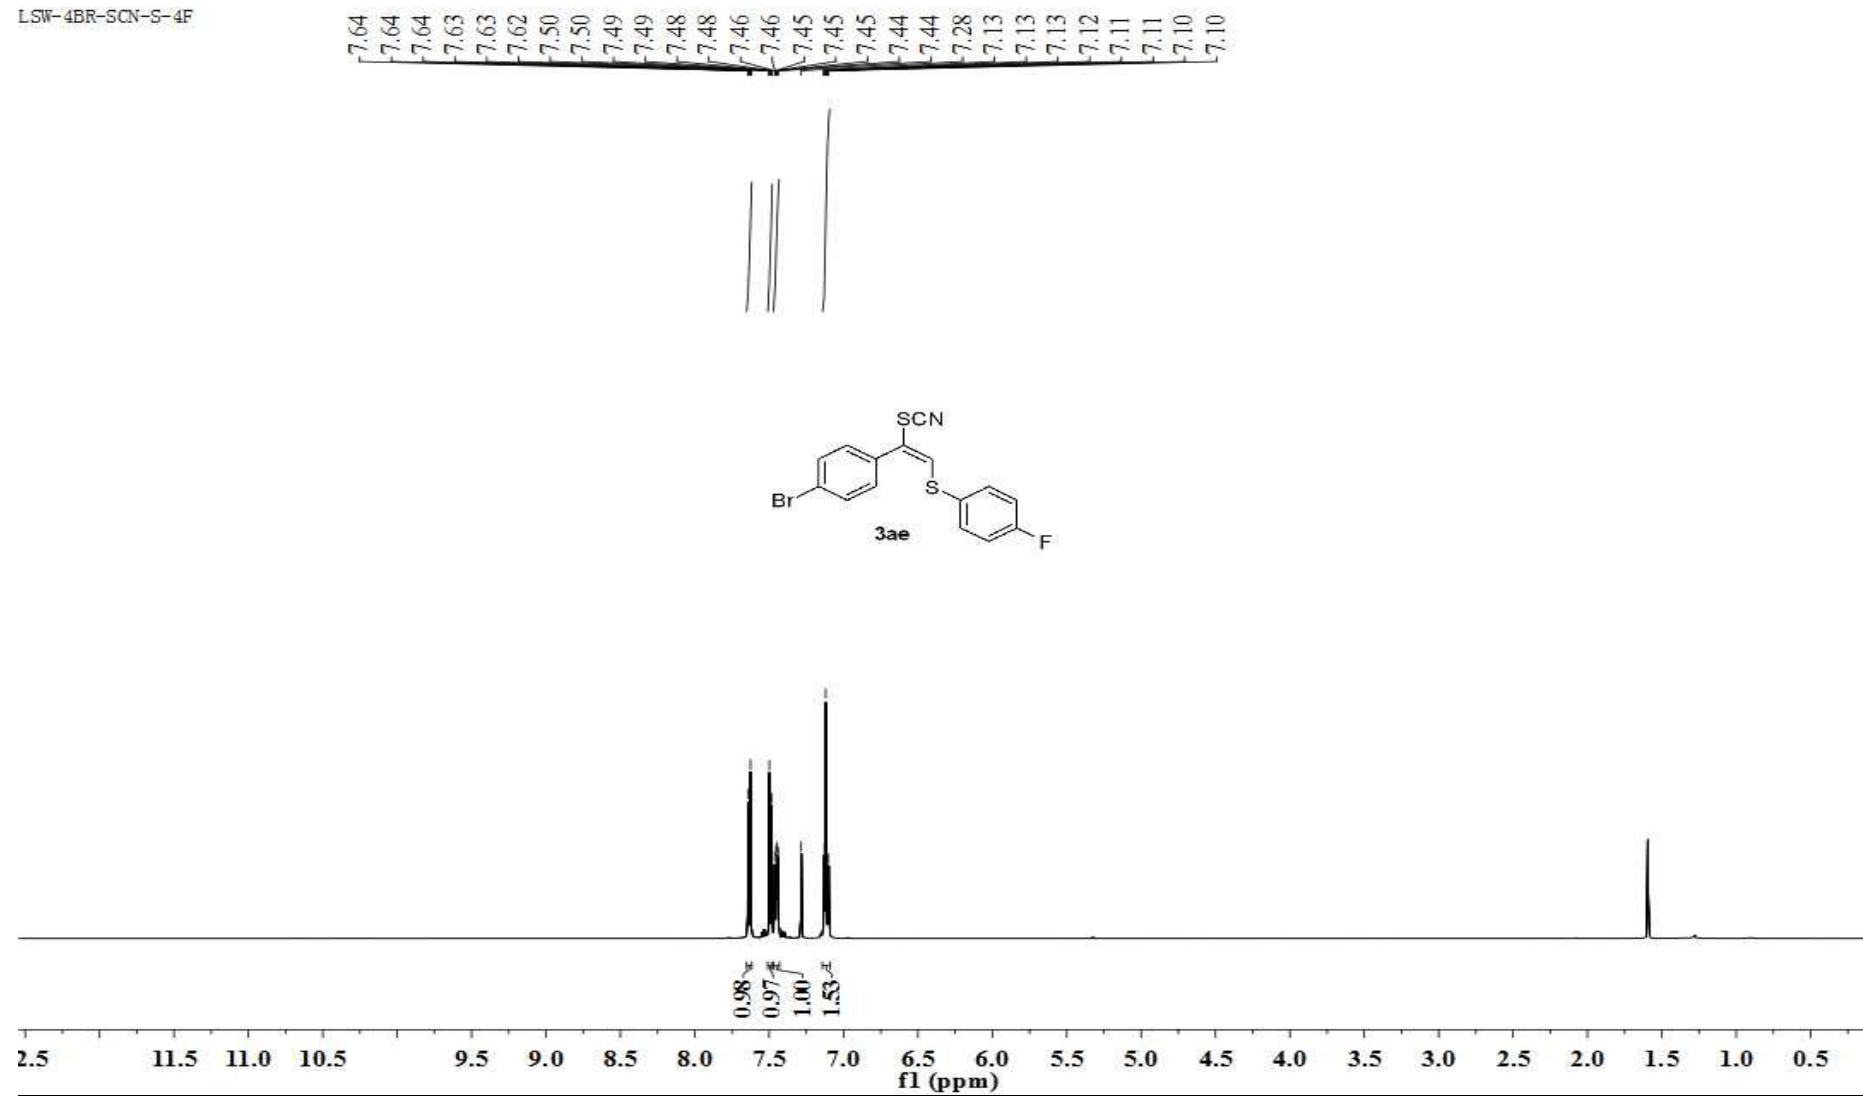

63.  $^{13}\text{C}$  NMR of **3ae** (125 MHz,  $\text{CDCl}_3$ )

LSW-4BR-SCN-S-4F

163.92  
162.26  
138.19  
133.71  
133.65  
133.57  
132.21  
130.44  
128.43  
128.41  
123.90  
117.15  
116.97  
116.82  
110.04

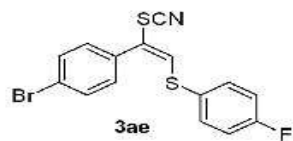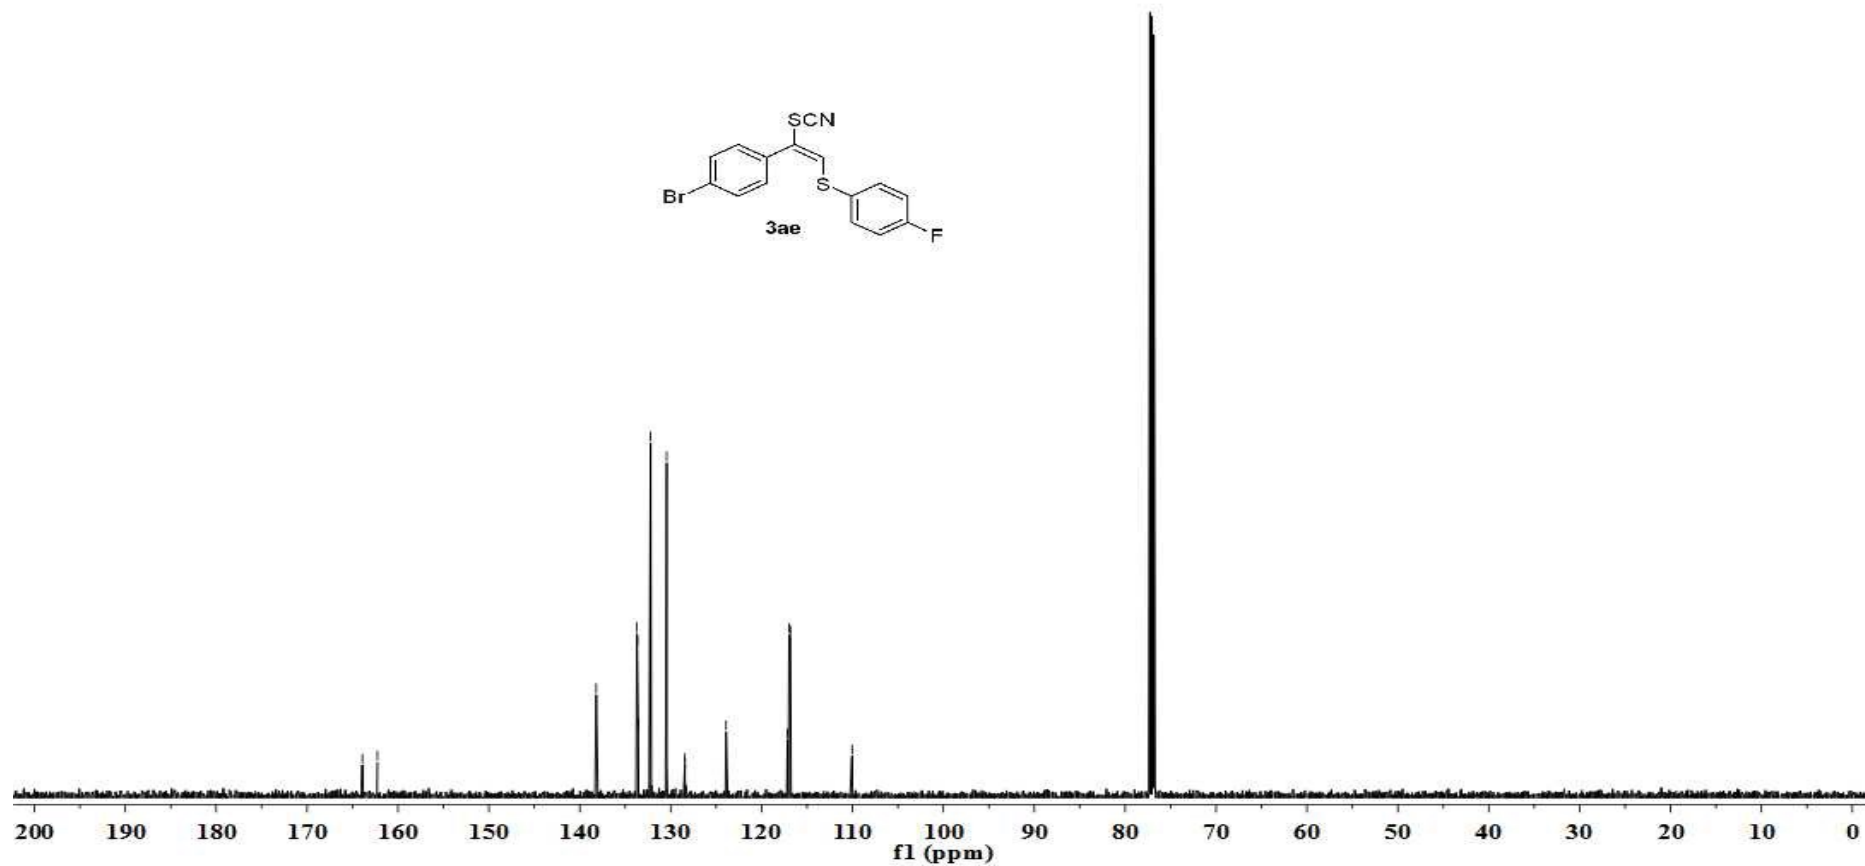

64.  $^1\text{H}$  NMR of **3af** (600 MHz,  $\text{CDCl}_3$ )

LSW-4BR-SCN-S-ME

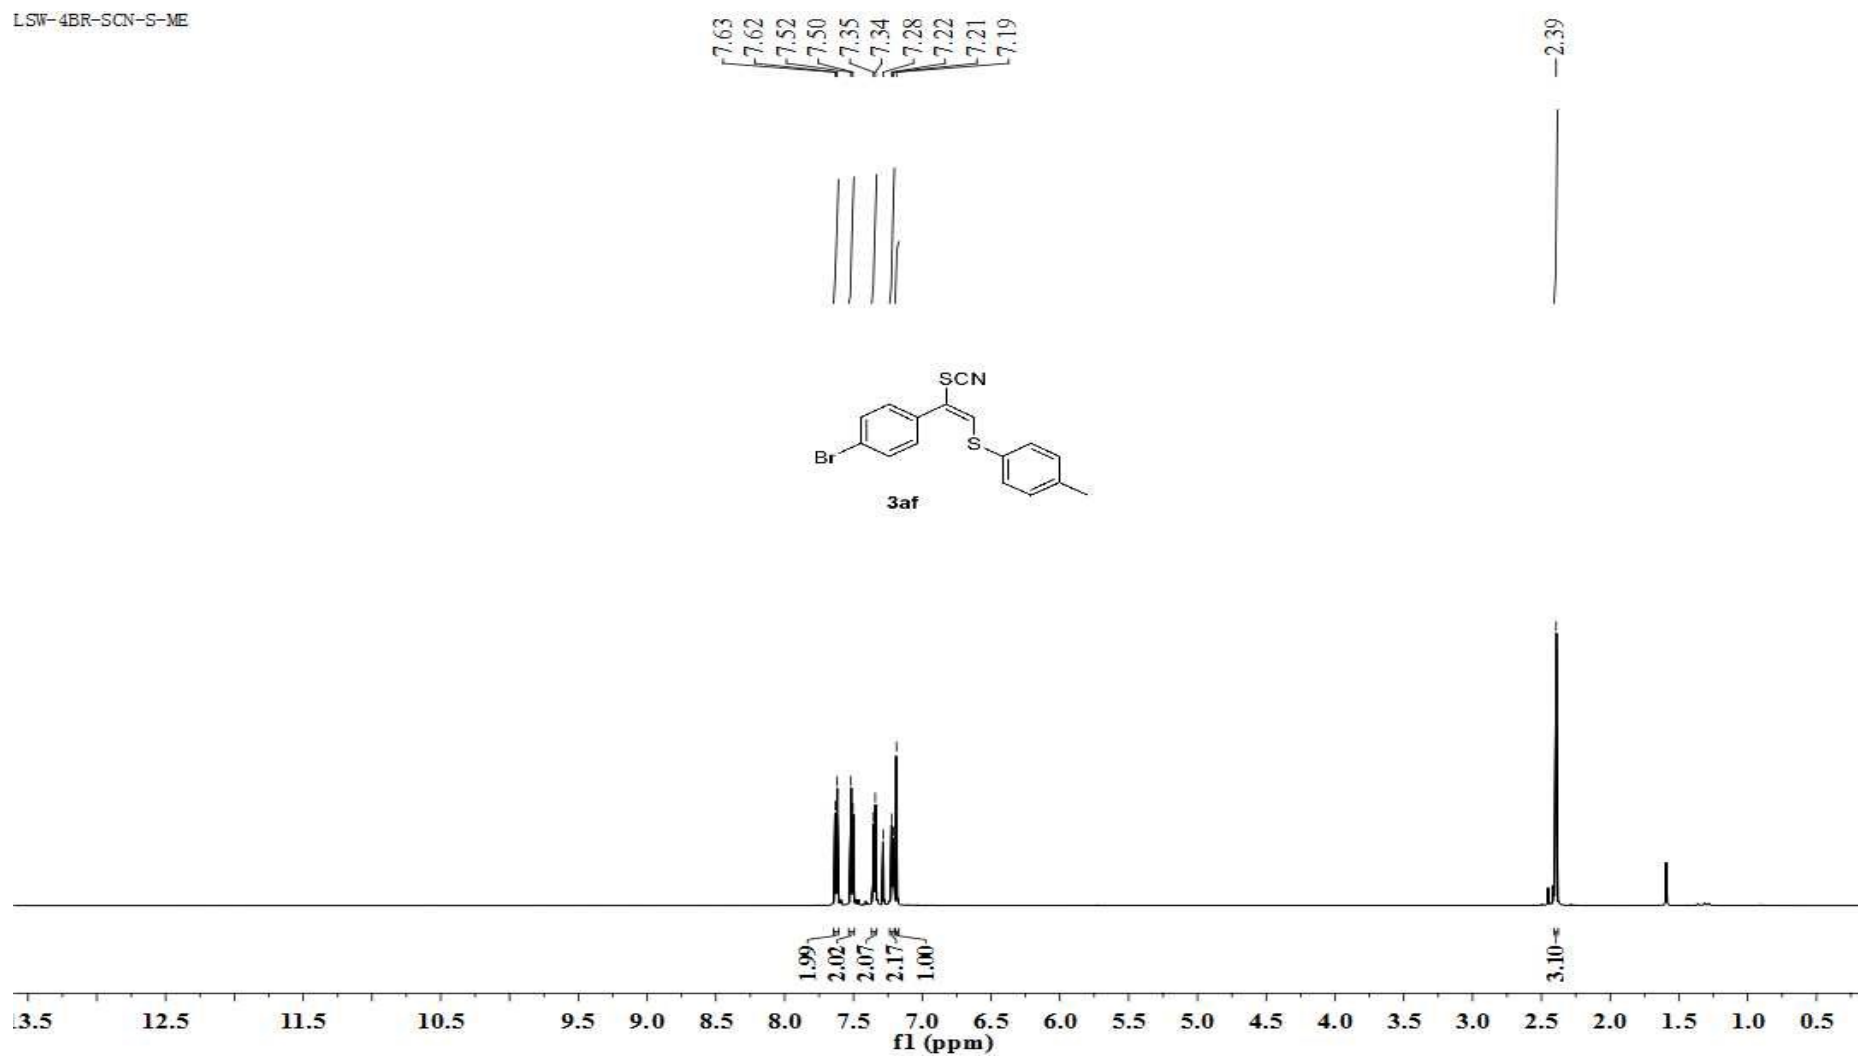

65.  $^{13}\text{C}$  NMR of **3af** (125 MHz,  $\text{CDCl}_3$ )

LSW-4BR-SCN-S-ME

139.39  
139.07  
133.83  
132.13  
131.41  
130.46  
130.40  
129.74  
123.66  
116.17  
110.26

-21.20

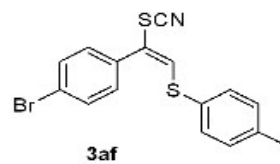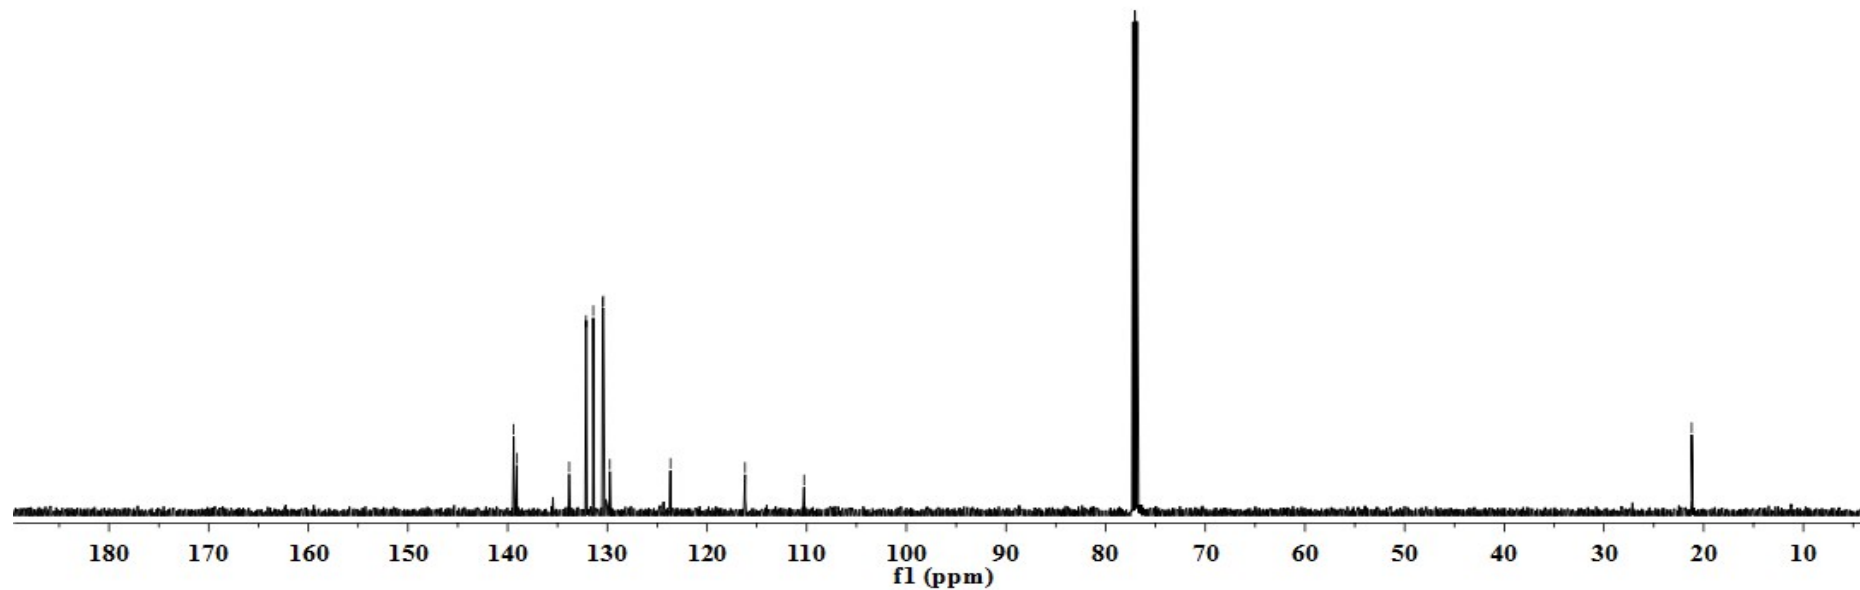



66. <sup>1</sup>H NMR of **3ag** (600 MHz, CDCl<sub>3</sub>)

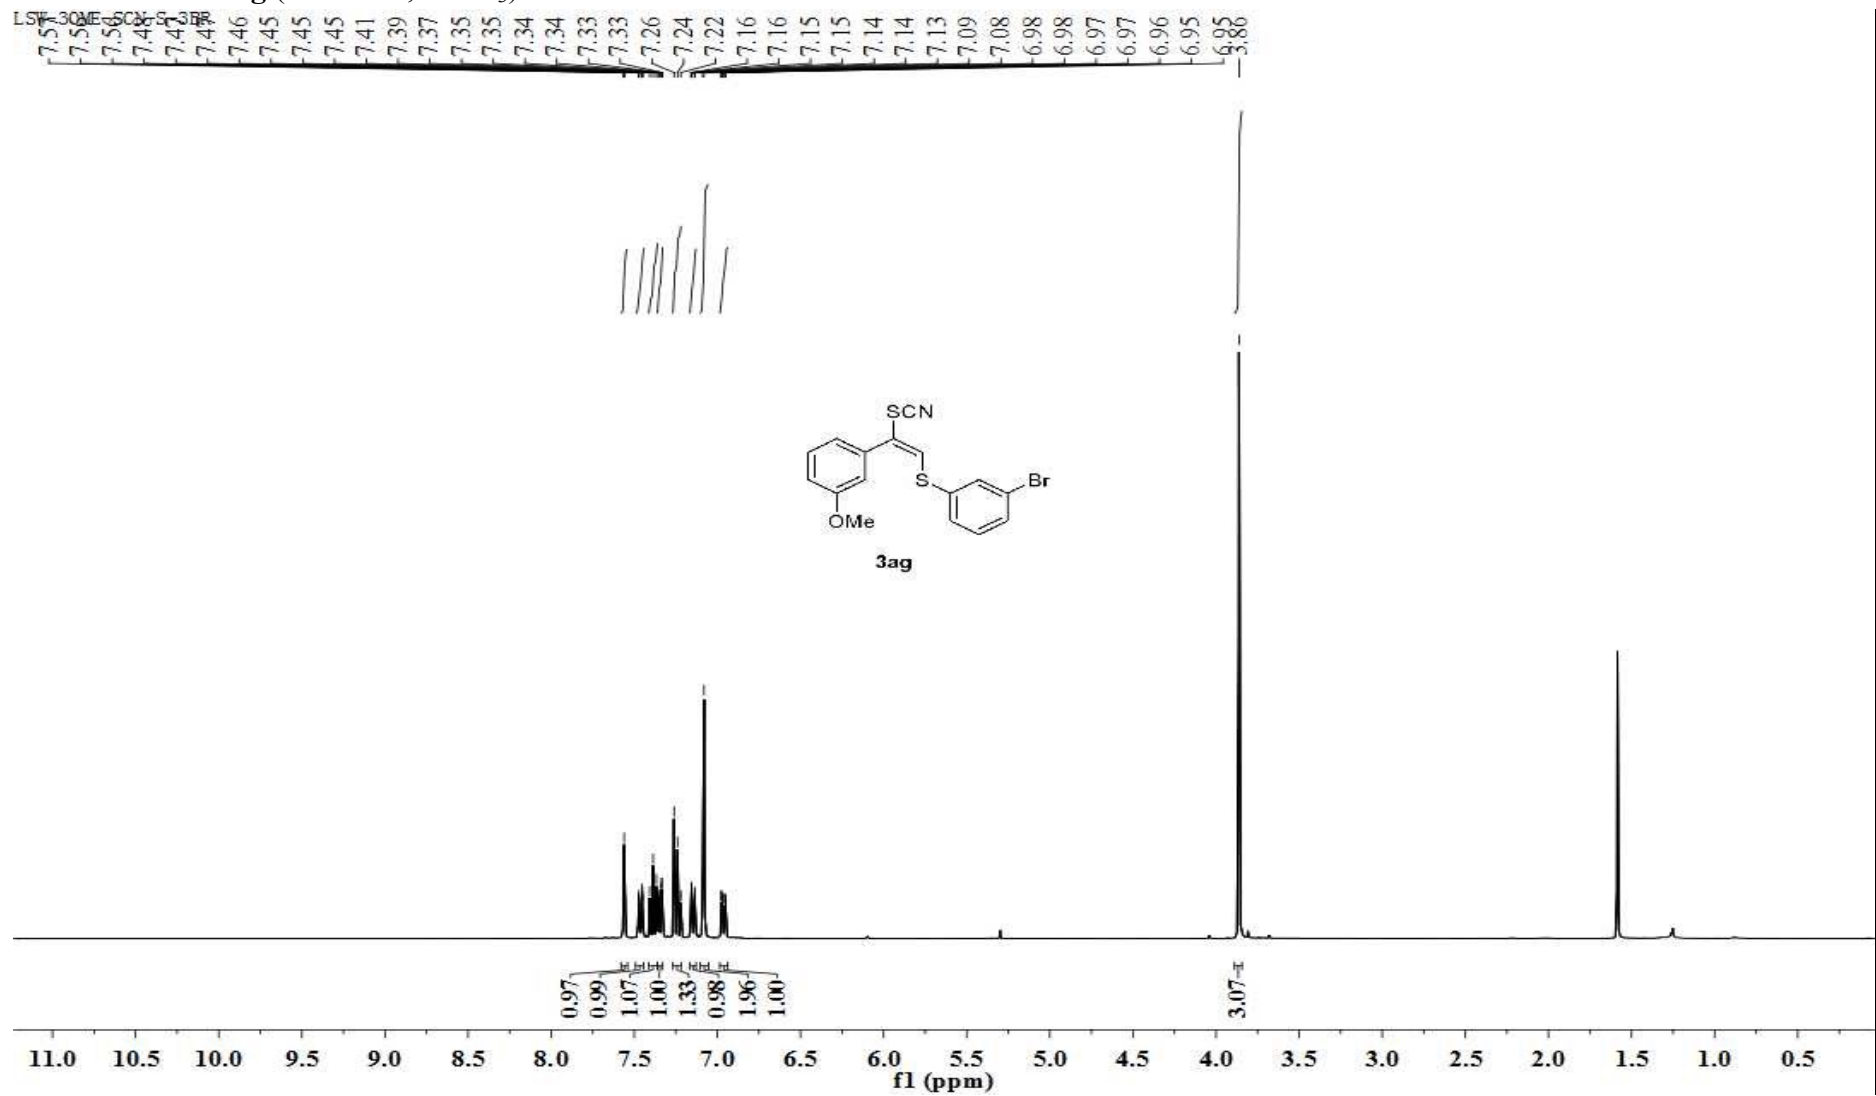

67.  $^{13}\text{C}$  NMR of **3ag** (125 MHz,  $\text{CDCl}_3$ )

LSW-30ME-SCN-S-3BR

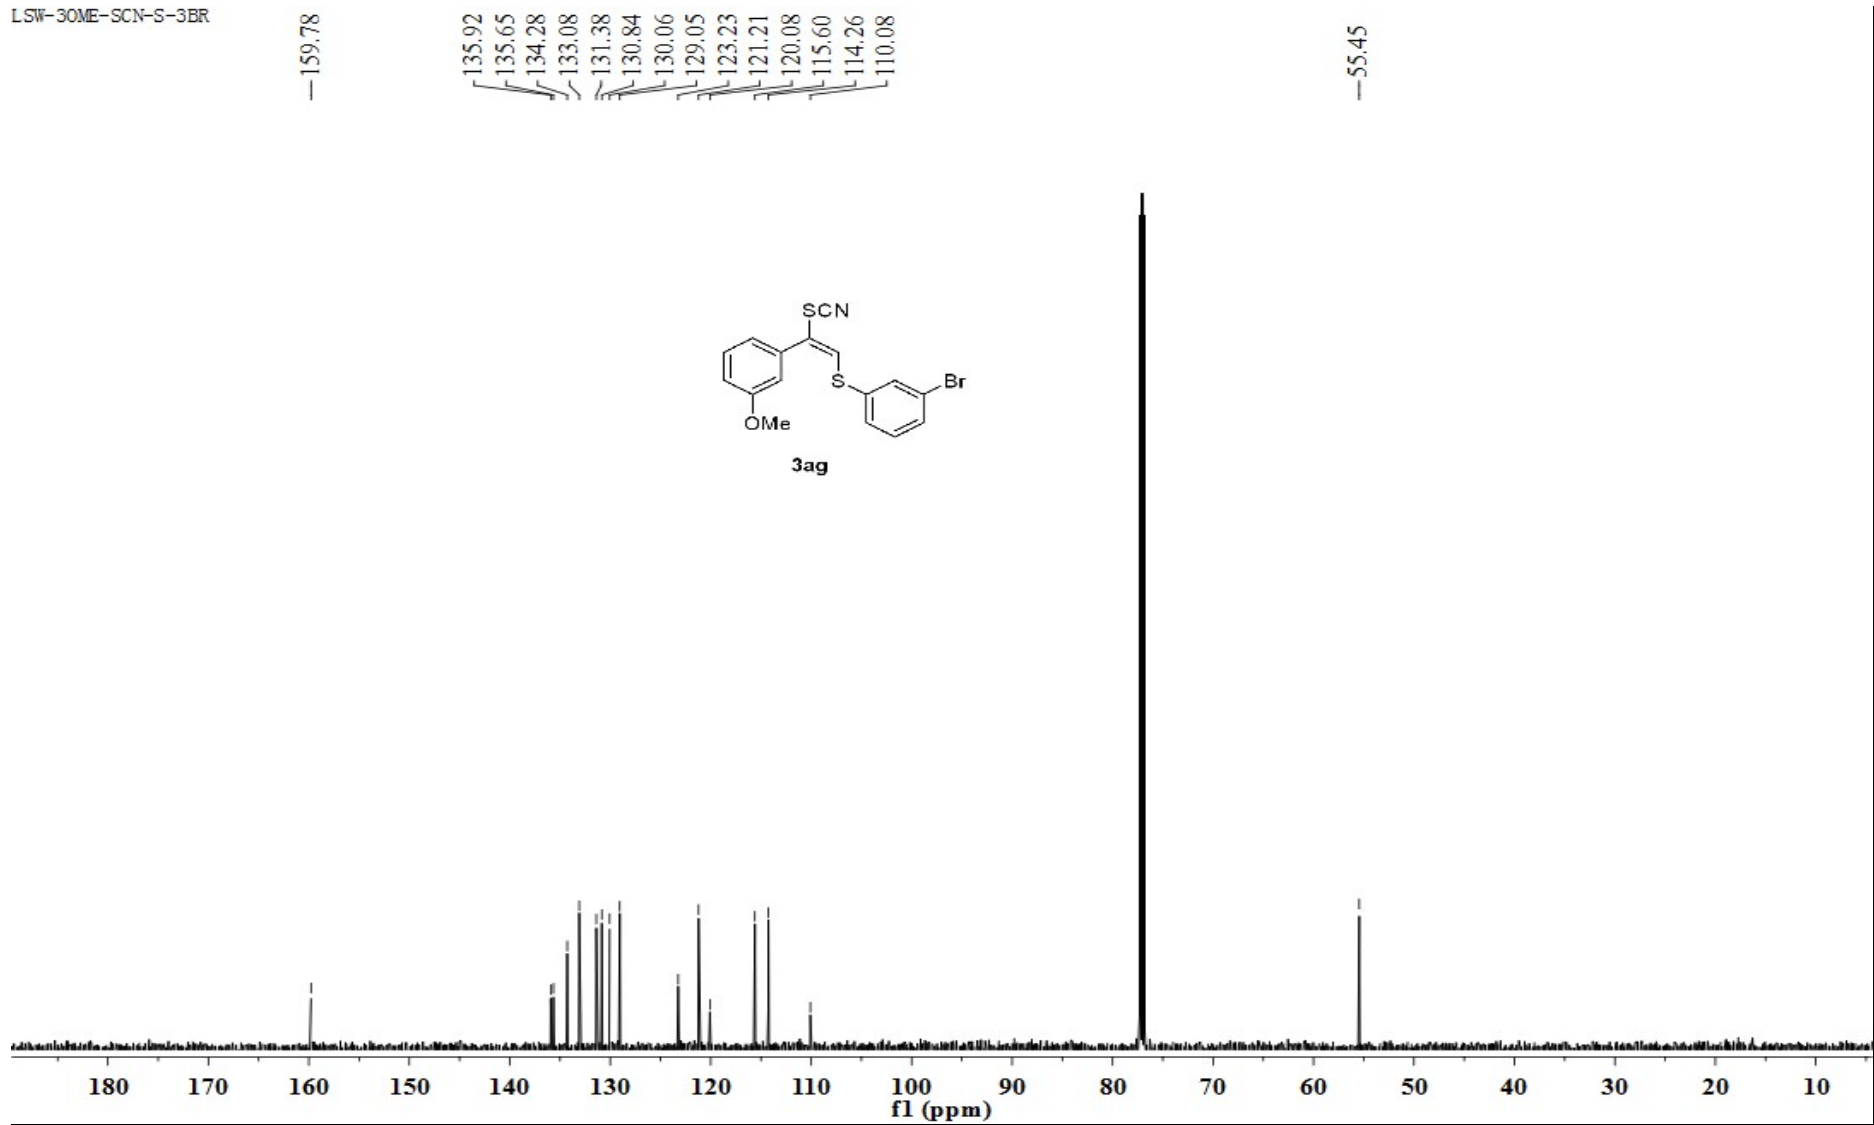

68. <sup>1</sup>H NMR of **3ah** (600 MHz, CDCl<sub>3</sub>)

LSW-30ME-SCN-SCL

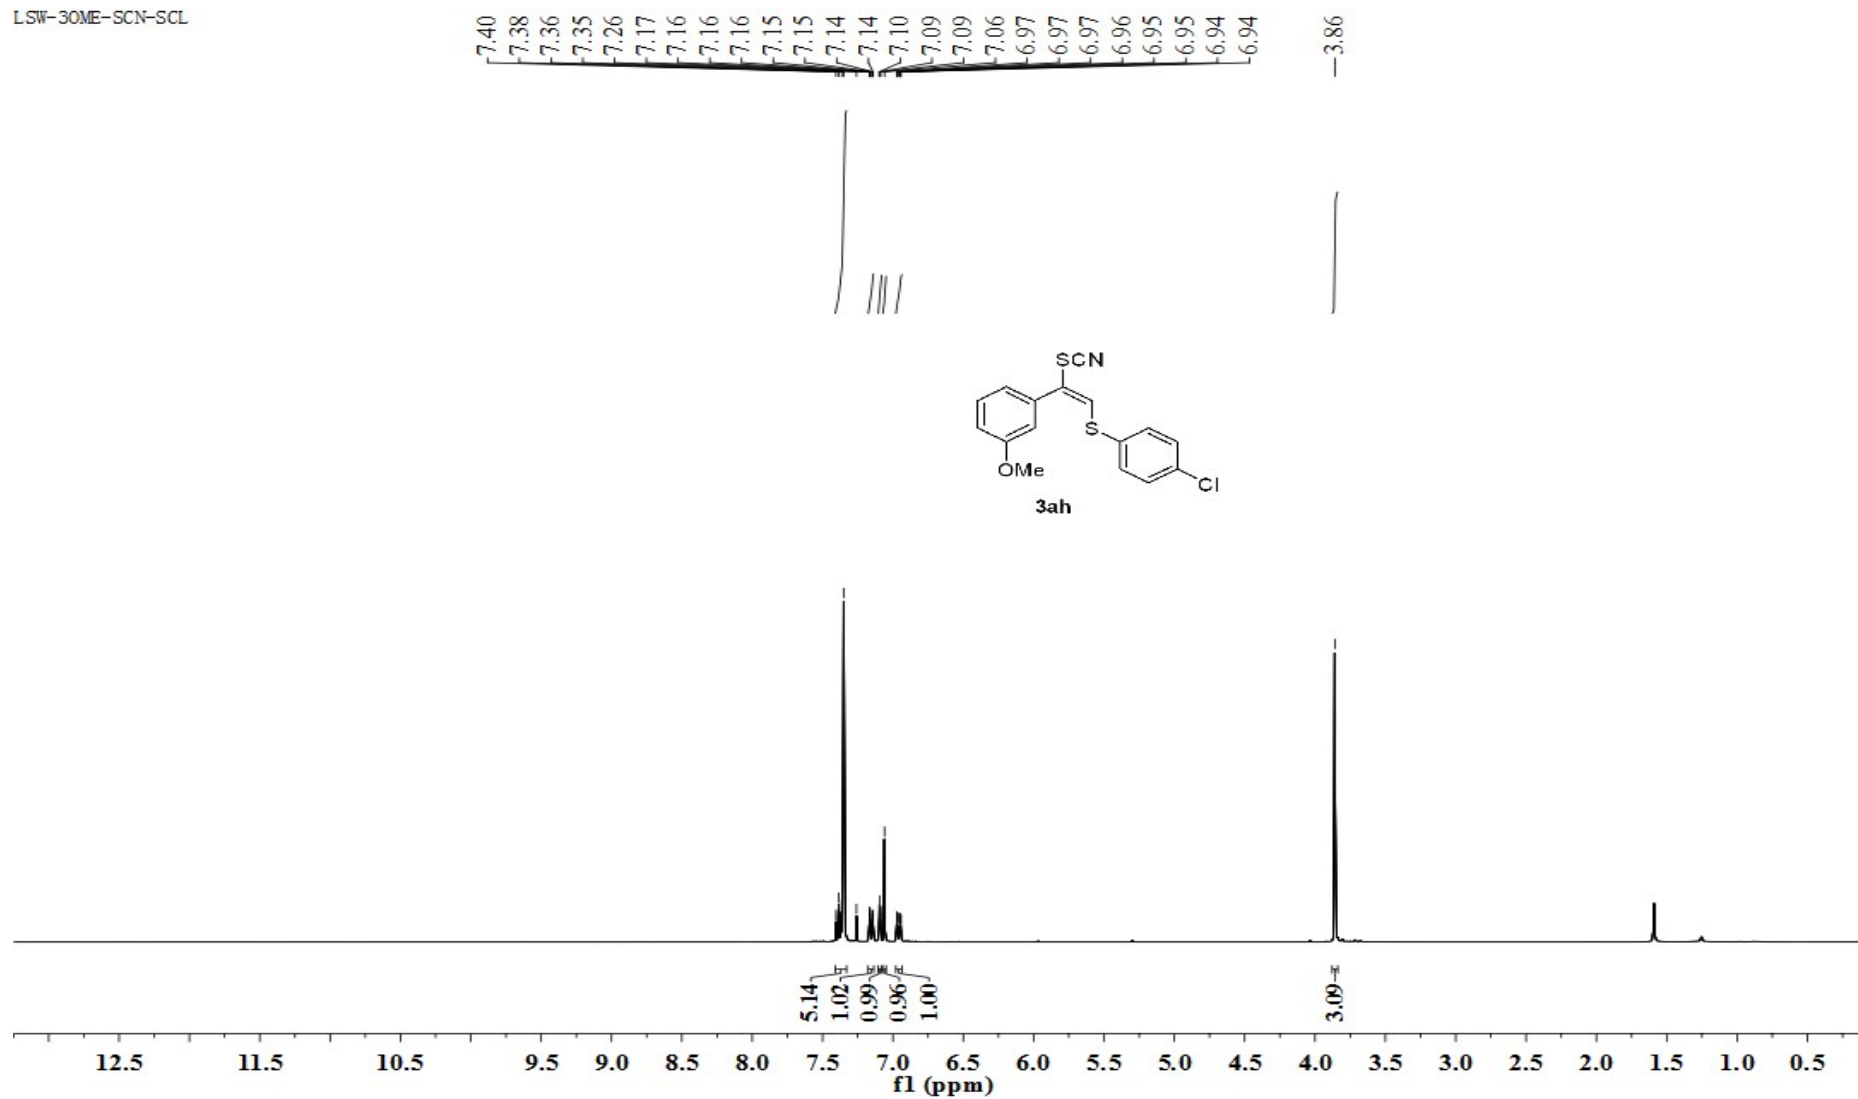

69.  $^{13}\text{C}$  NMR of **3ah** (125 MHz,  $\text{CDCl}_3$ )

LSW-3OMe-SCN-S-CL

— 159.78

135.72

135.27

134.68

132.29

132.09

130.04

129.75

121.20

119.28

115.50

114.29

110.20

— 55.44

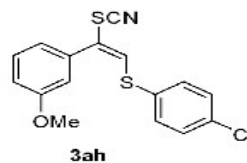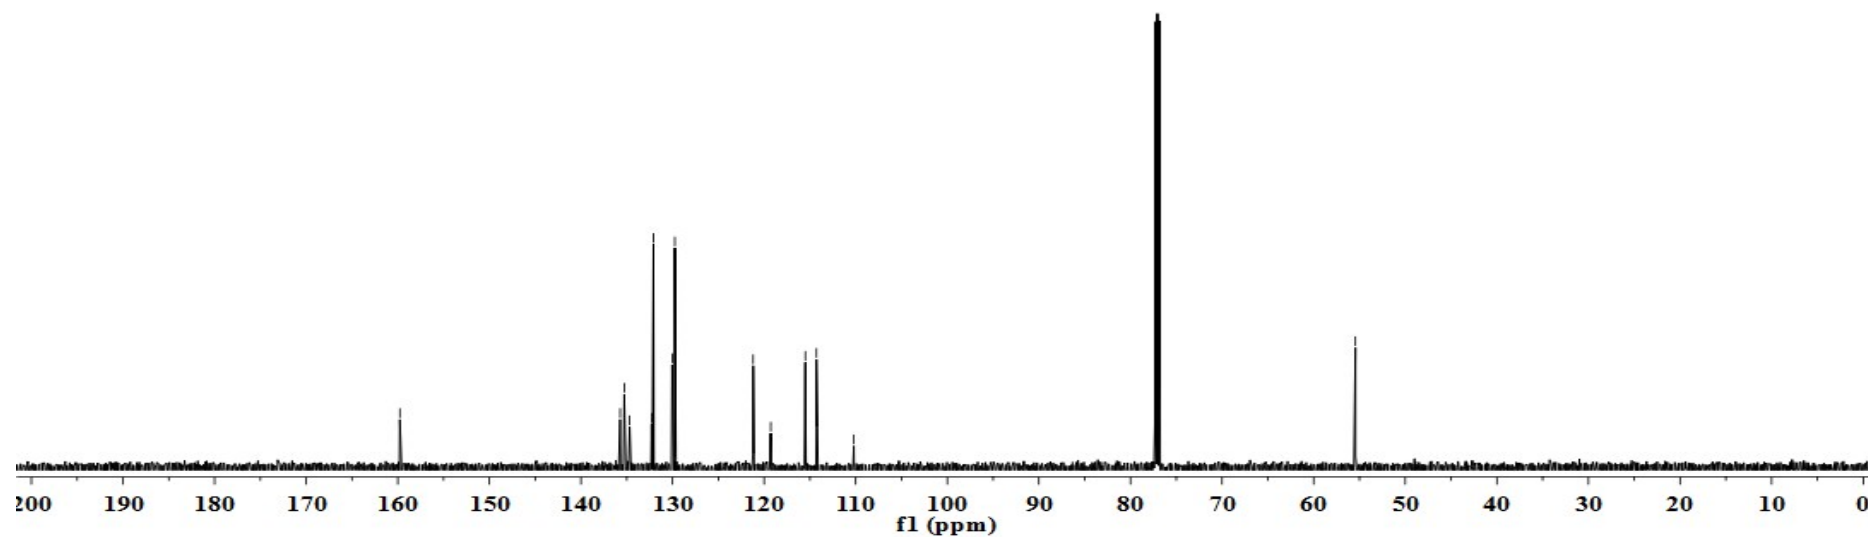

70. <sup>1</sup>H NMR of **3ai** (600 MHz, CDCl<sub>3</sub>)

LSW-3OME-SCN-S-4I

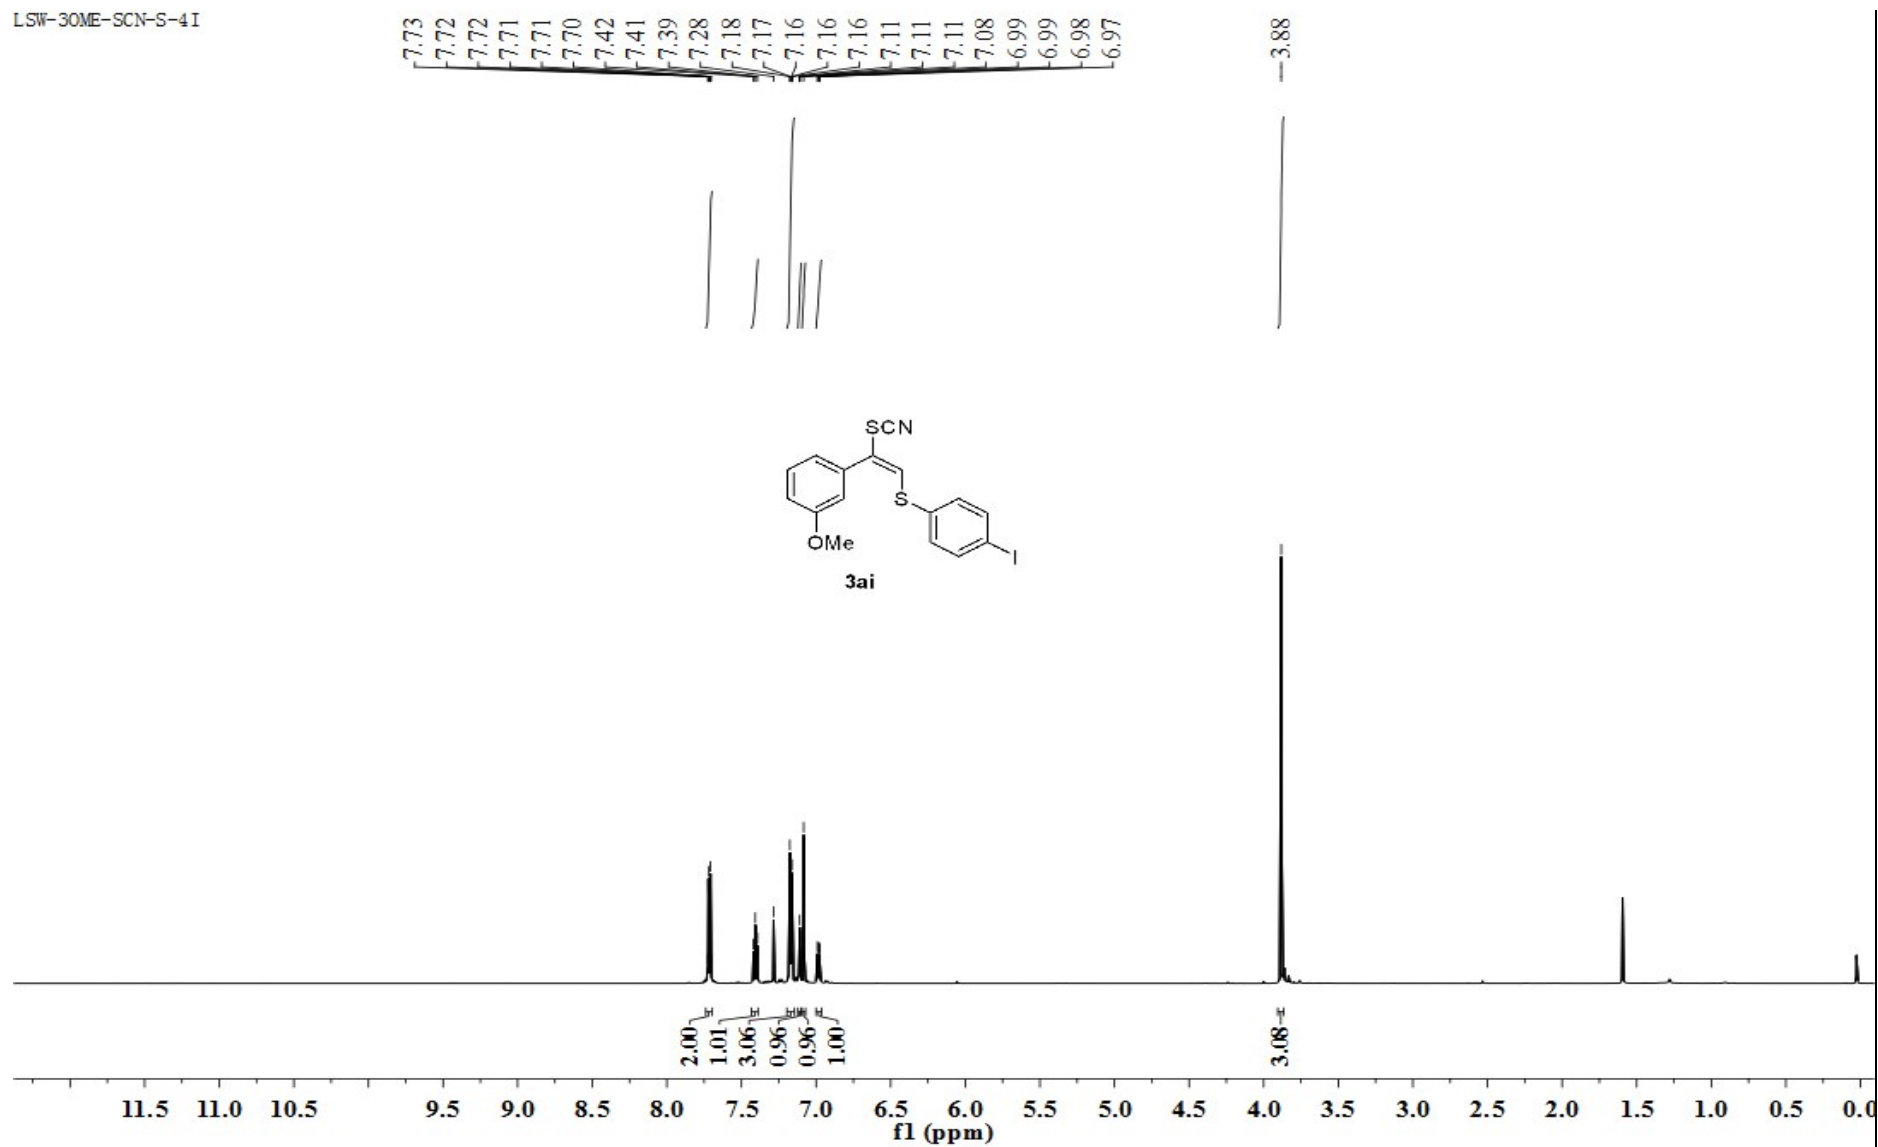

71.  $^{13}\text{C}$  NMR of **3ai** (125 MHz,  $\text{CDCl}_3$ )

LSW-3OME-SCN-S-4I

—159.77

138.59

135.69

134.67

133.84

132.22

130.05

121.20

119.63

115.53

114.29

110.15

—93.92

—55.45

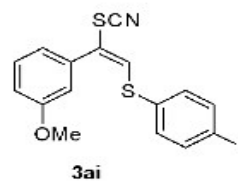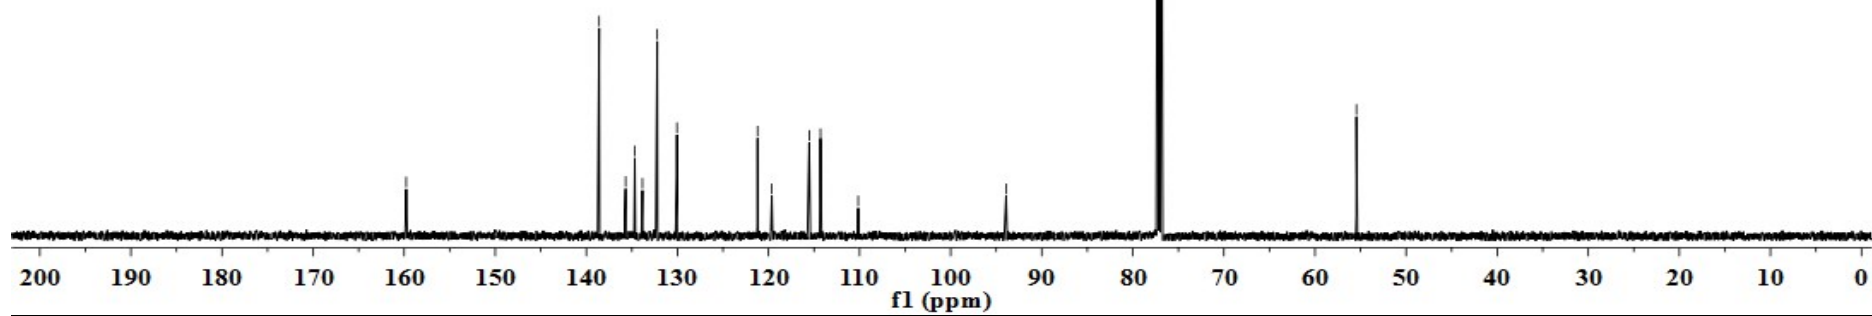

72. <sup>1</sup>H NMR of **3aj** (600 MHz, CDCl<sub>3</sub>)

LSW-3OME-SCN-SAC

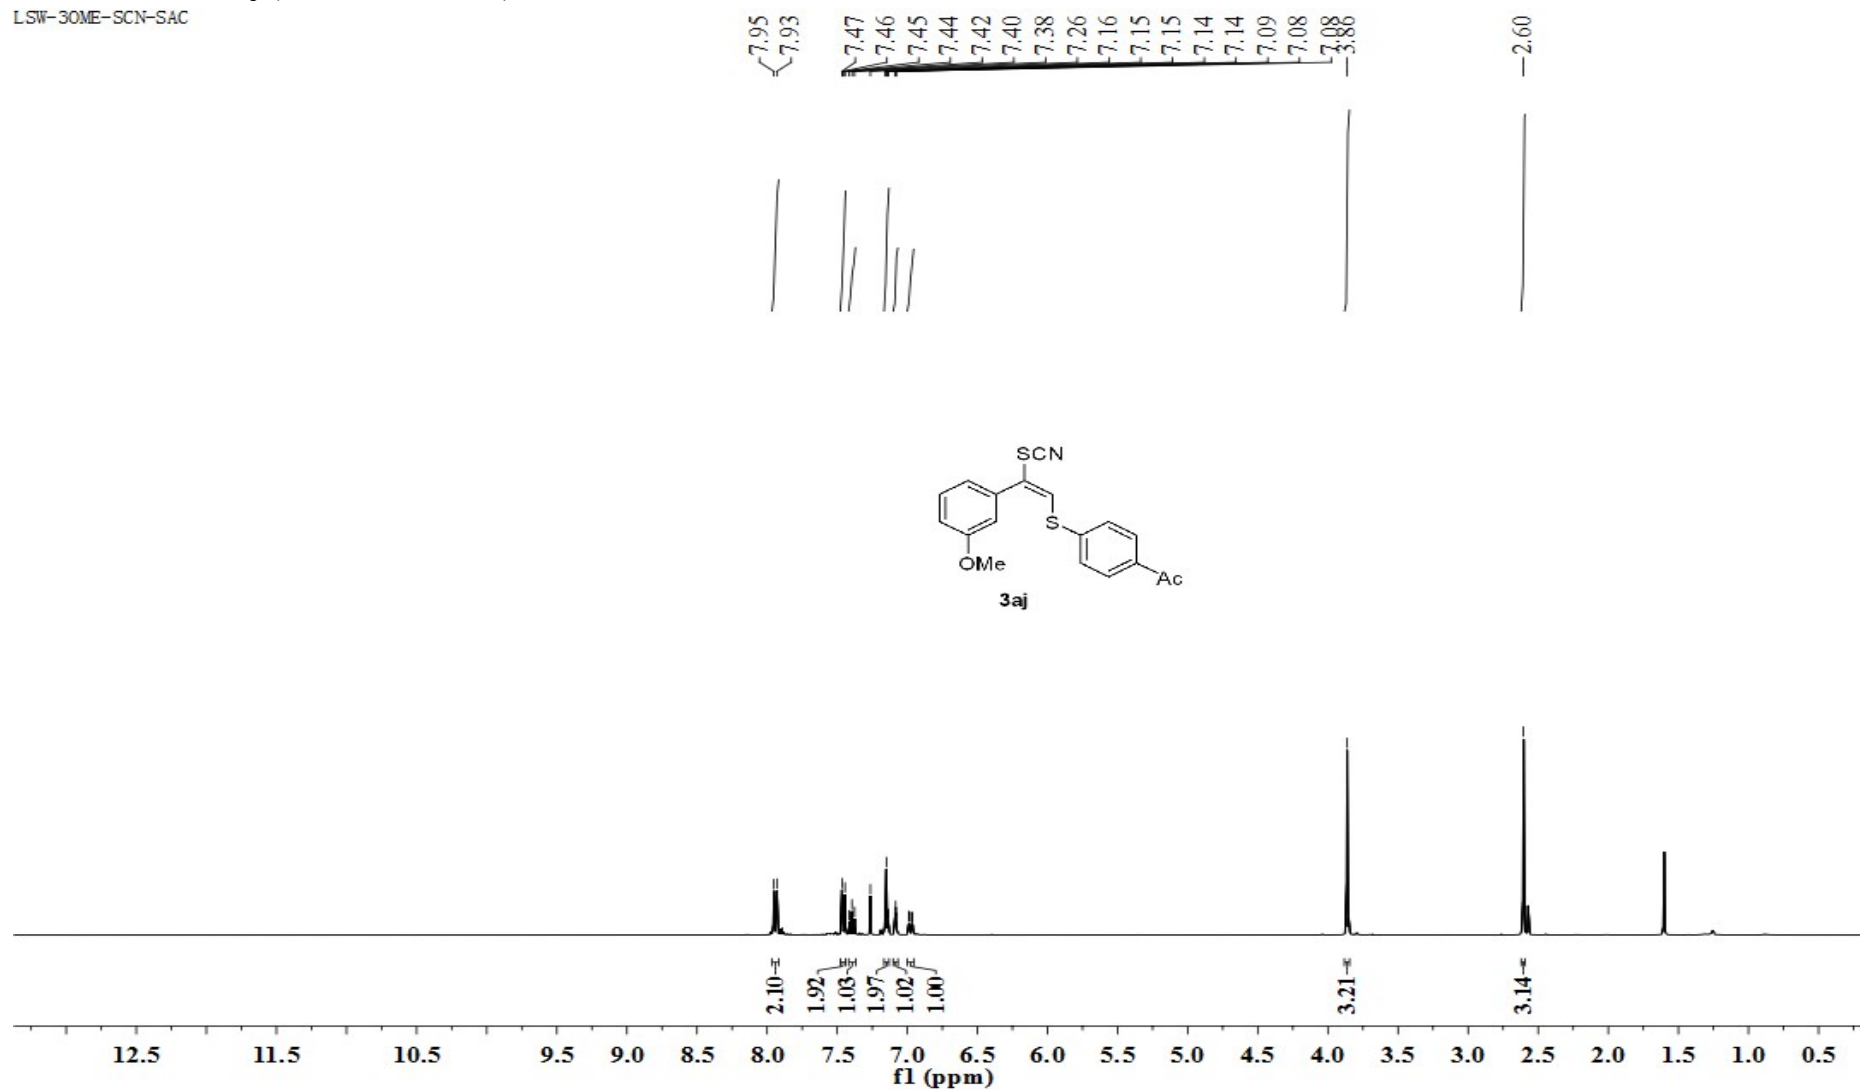

73.  $^{13}\text{C}$  NMR of **3aj** (125 MHz,  $\text{CDCl}_3$ )

LSW-30ME-SCN-S-AC

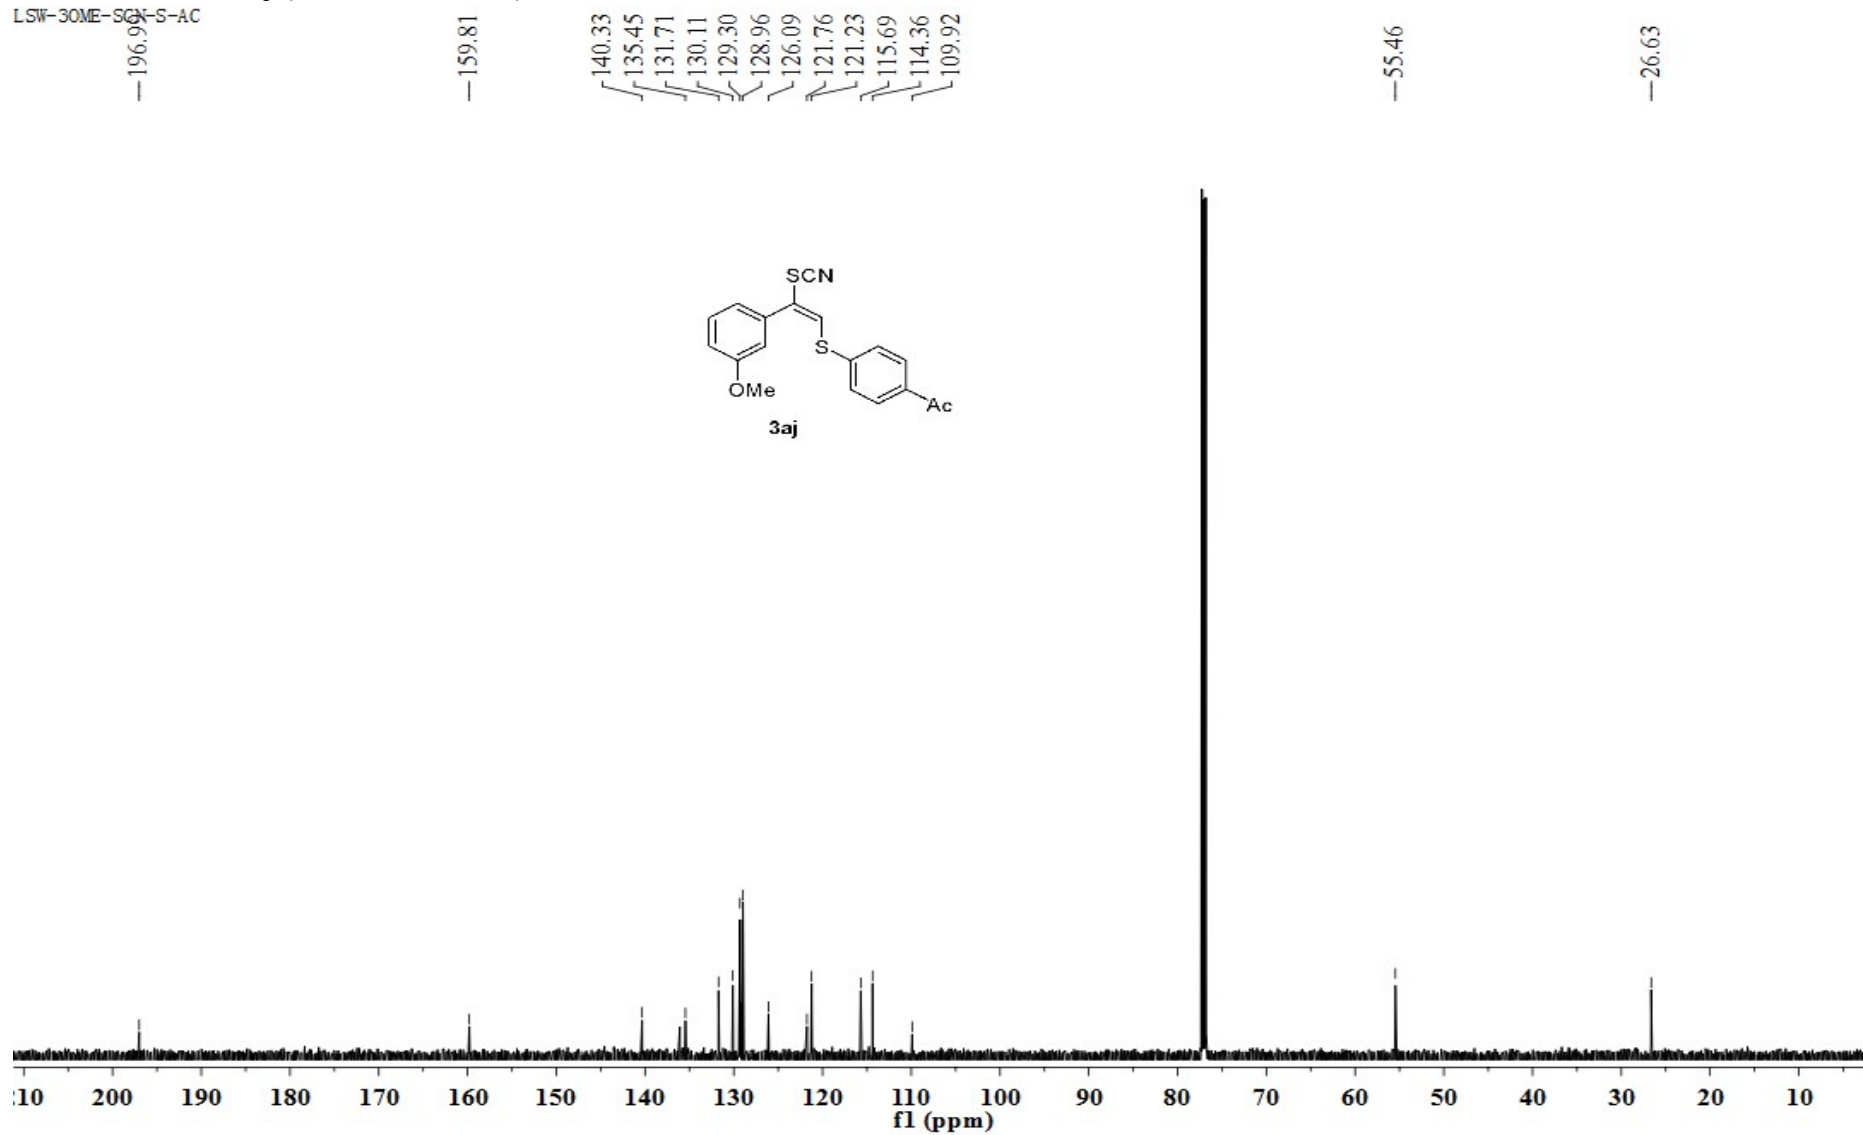



74. <sup>1</sup>H NMR of **3ak** (600 MHz, CDCl<sub>3</sub>)

LSW-30ME-SCN-S-NO2

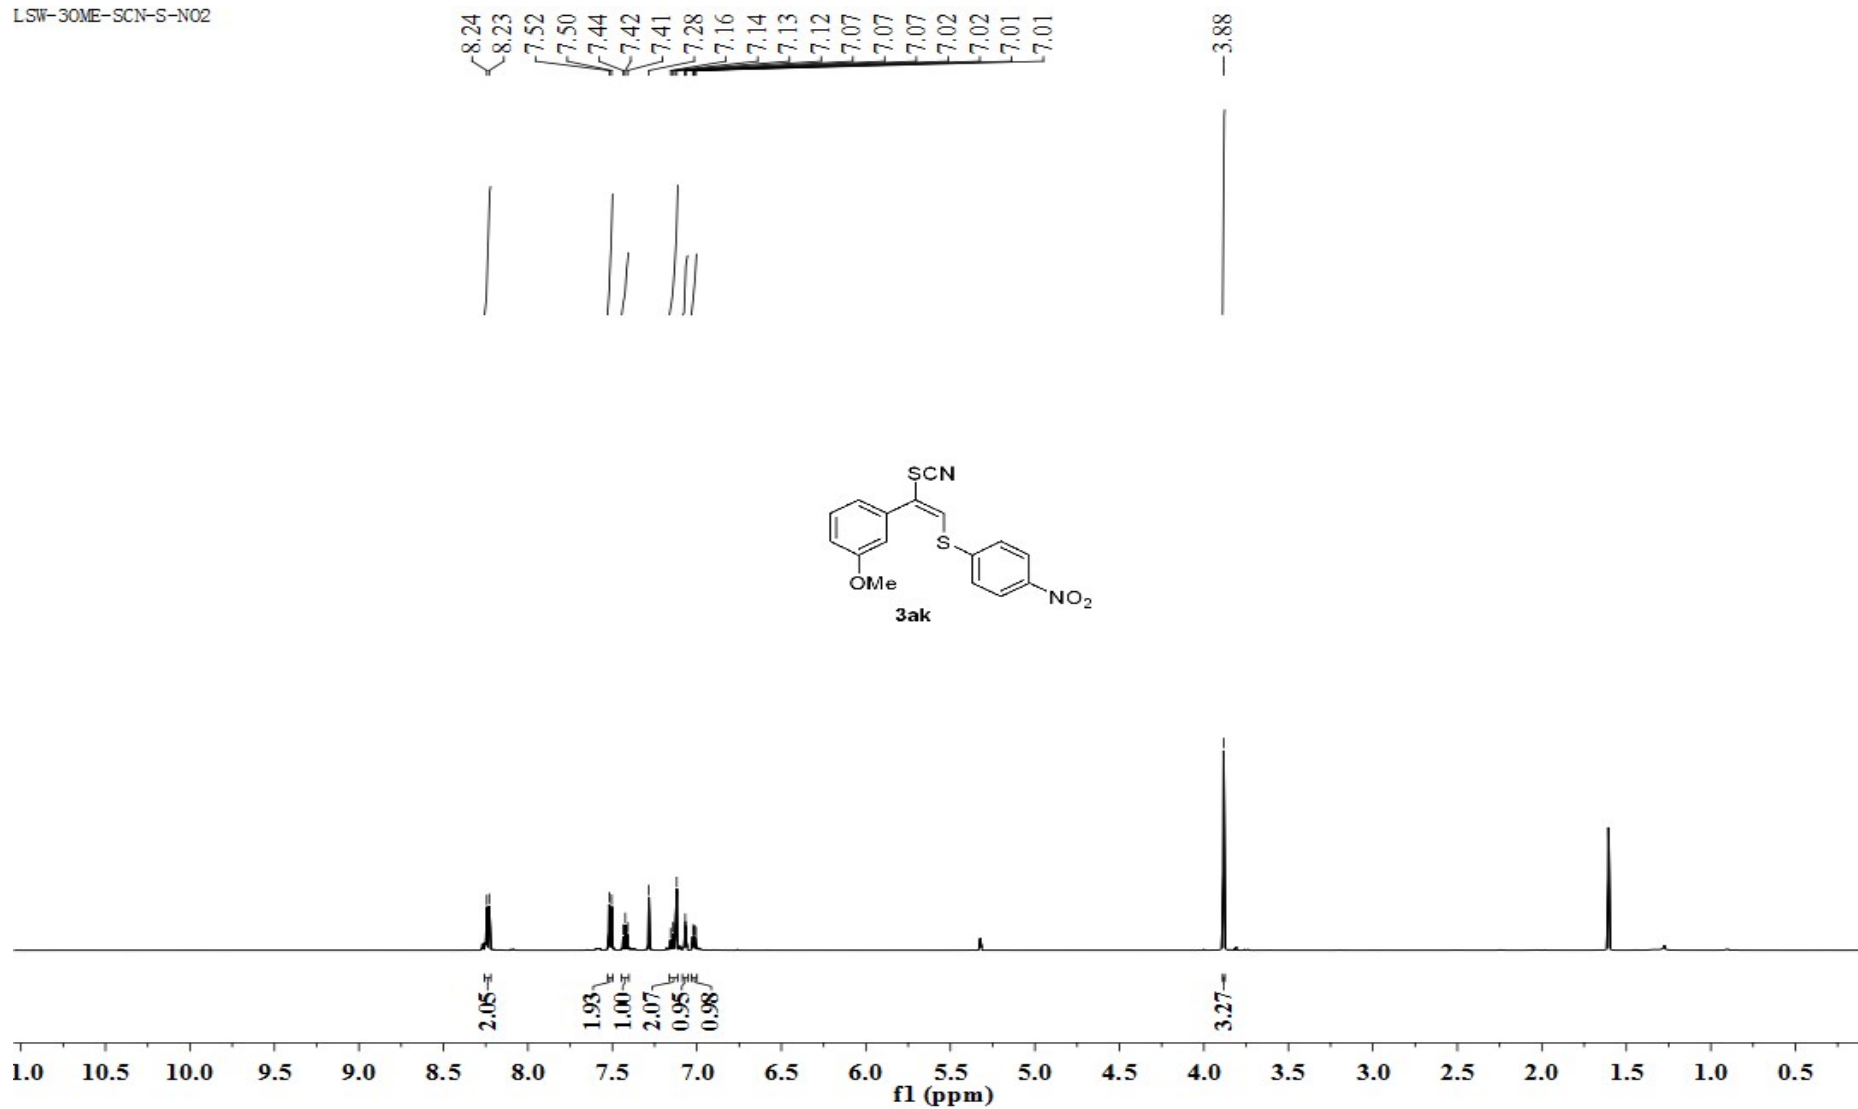

75. <sup>13</sup>C NMR of **3ak** (125 MHz, CDCl<sub>3</sub>)

LSW-3OME-SCN-S-NO2

— 159.87  
— 146.79  
— 143.24  
/ 134.97  
/ 130.23  
/ 129.21  
/ 128.66  
/ 128.34  
/ 124.51  
/ 121.20  
/ 115.93  
/ 114.44  
/ 109.51

— 55.48

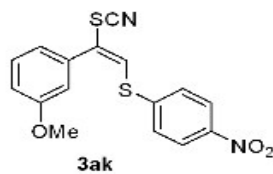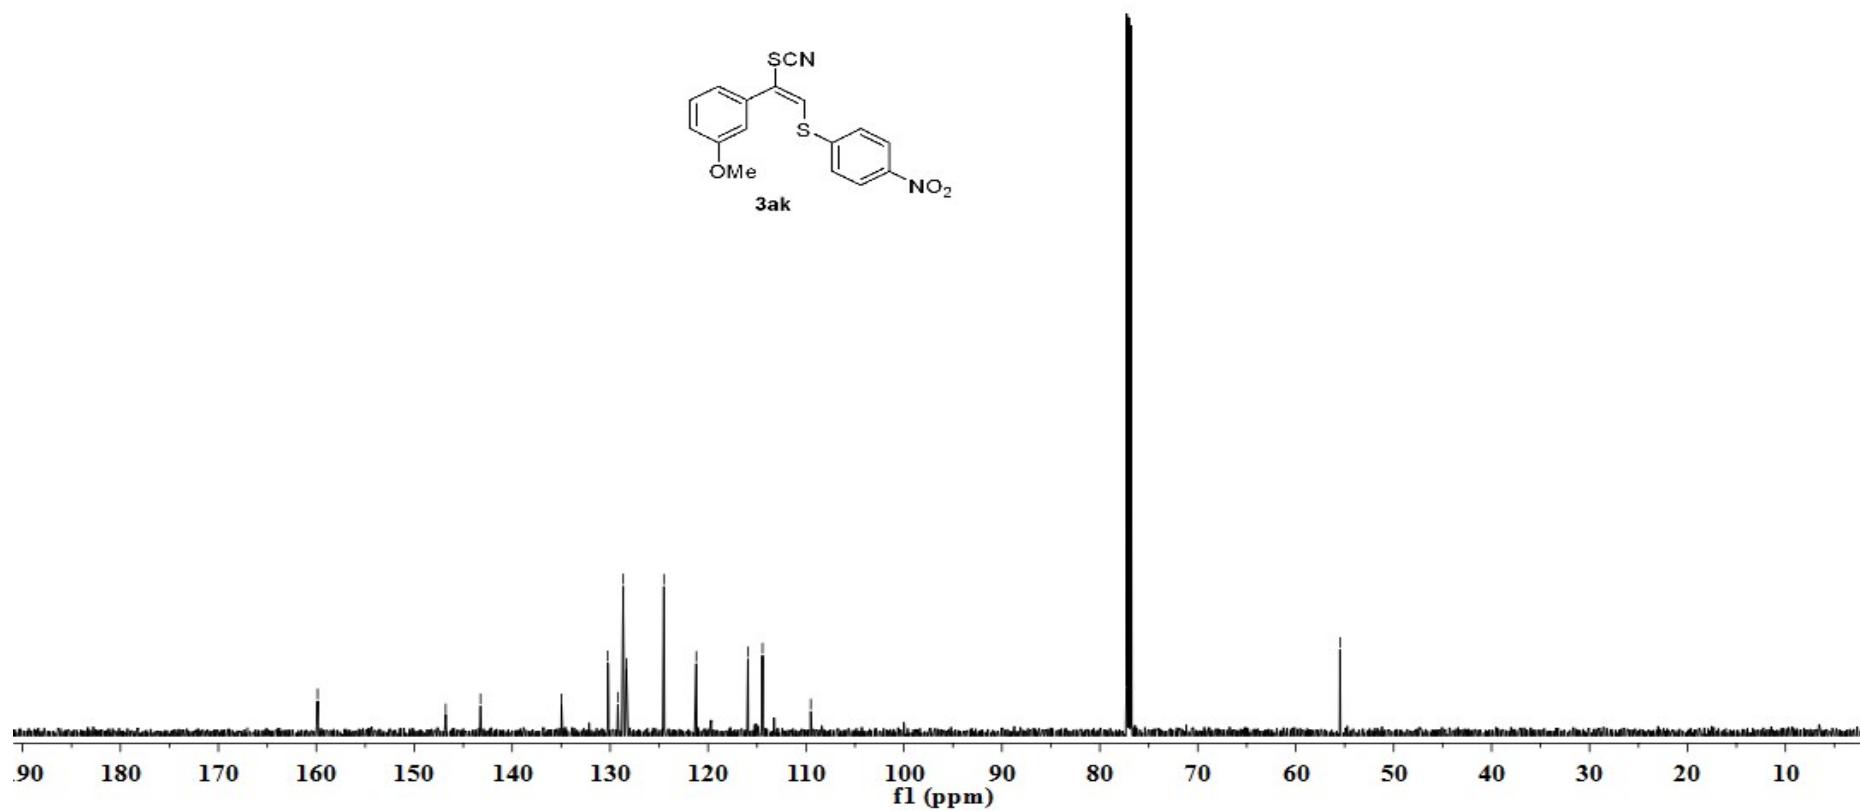

76. <sup>1</sup>H NMR of **3al** (600 MHz, CDCl<sub>3</sub>)

LSW-30ME-SCN-SCY

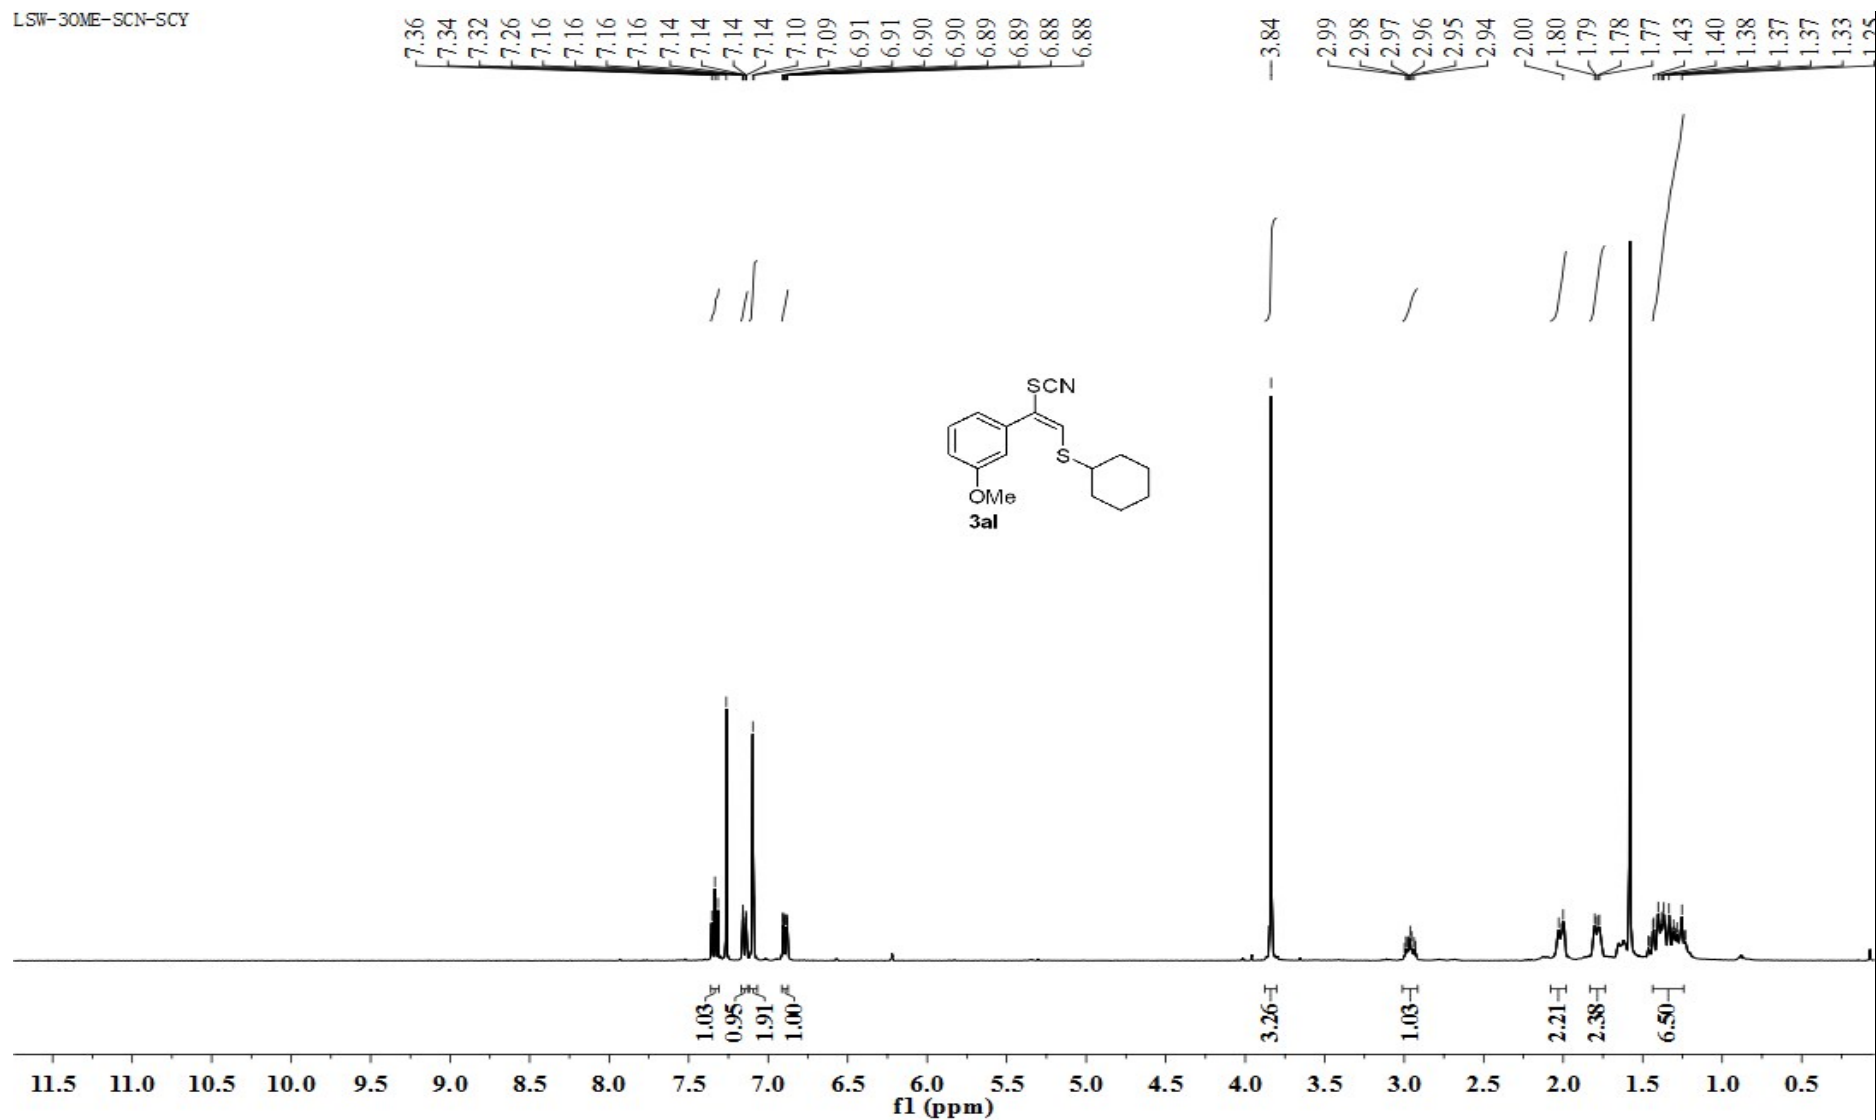

77. <sup>13</sup>C NMR of **3al** (125 MHz, CDCl<sub>3</sub>)

LSW-30ME-SCN-S-CY

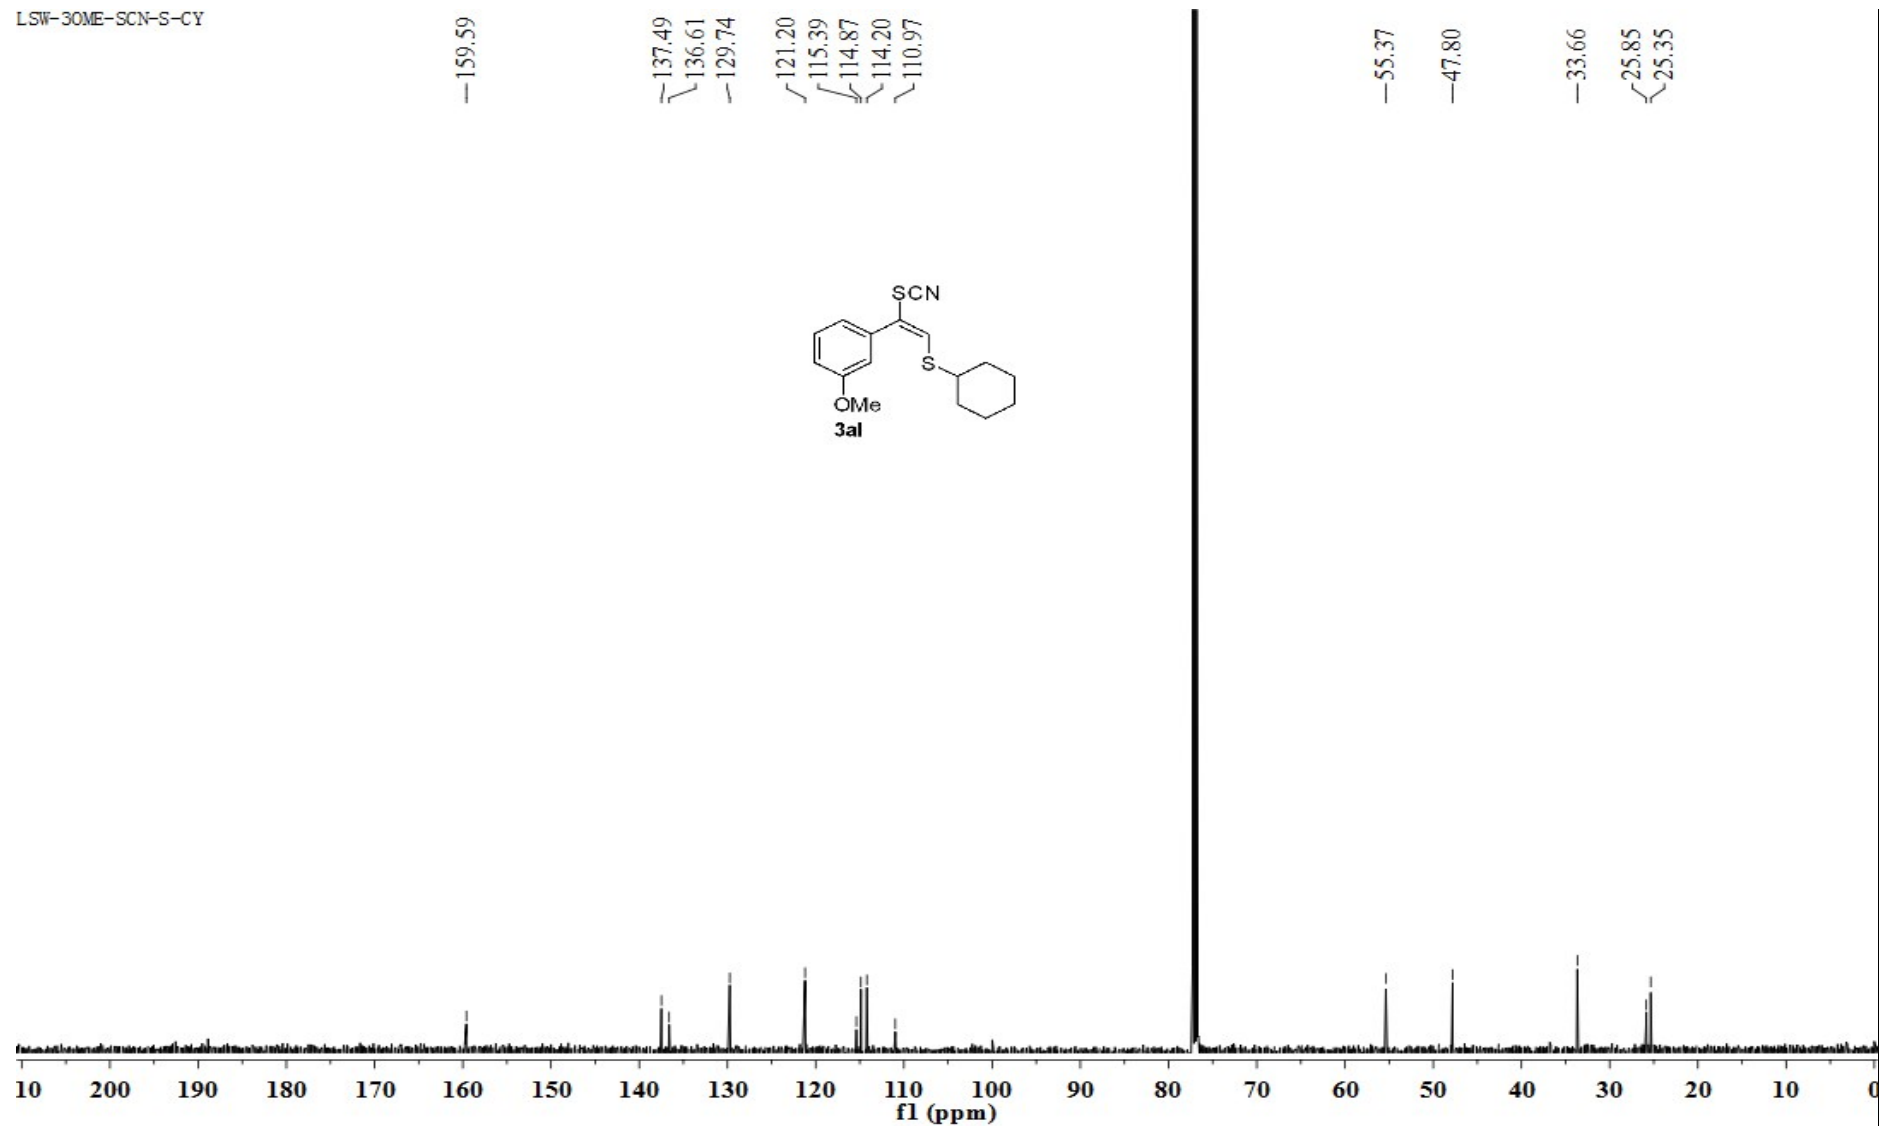

78. <sup>1</sup>H NMR of **3am** (600 MHz, CDCl<sub>3</sub>)

LSW-30ME-SCN-S8C

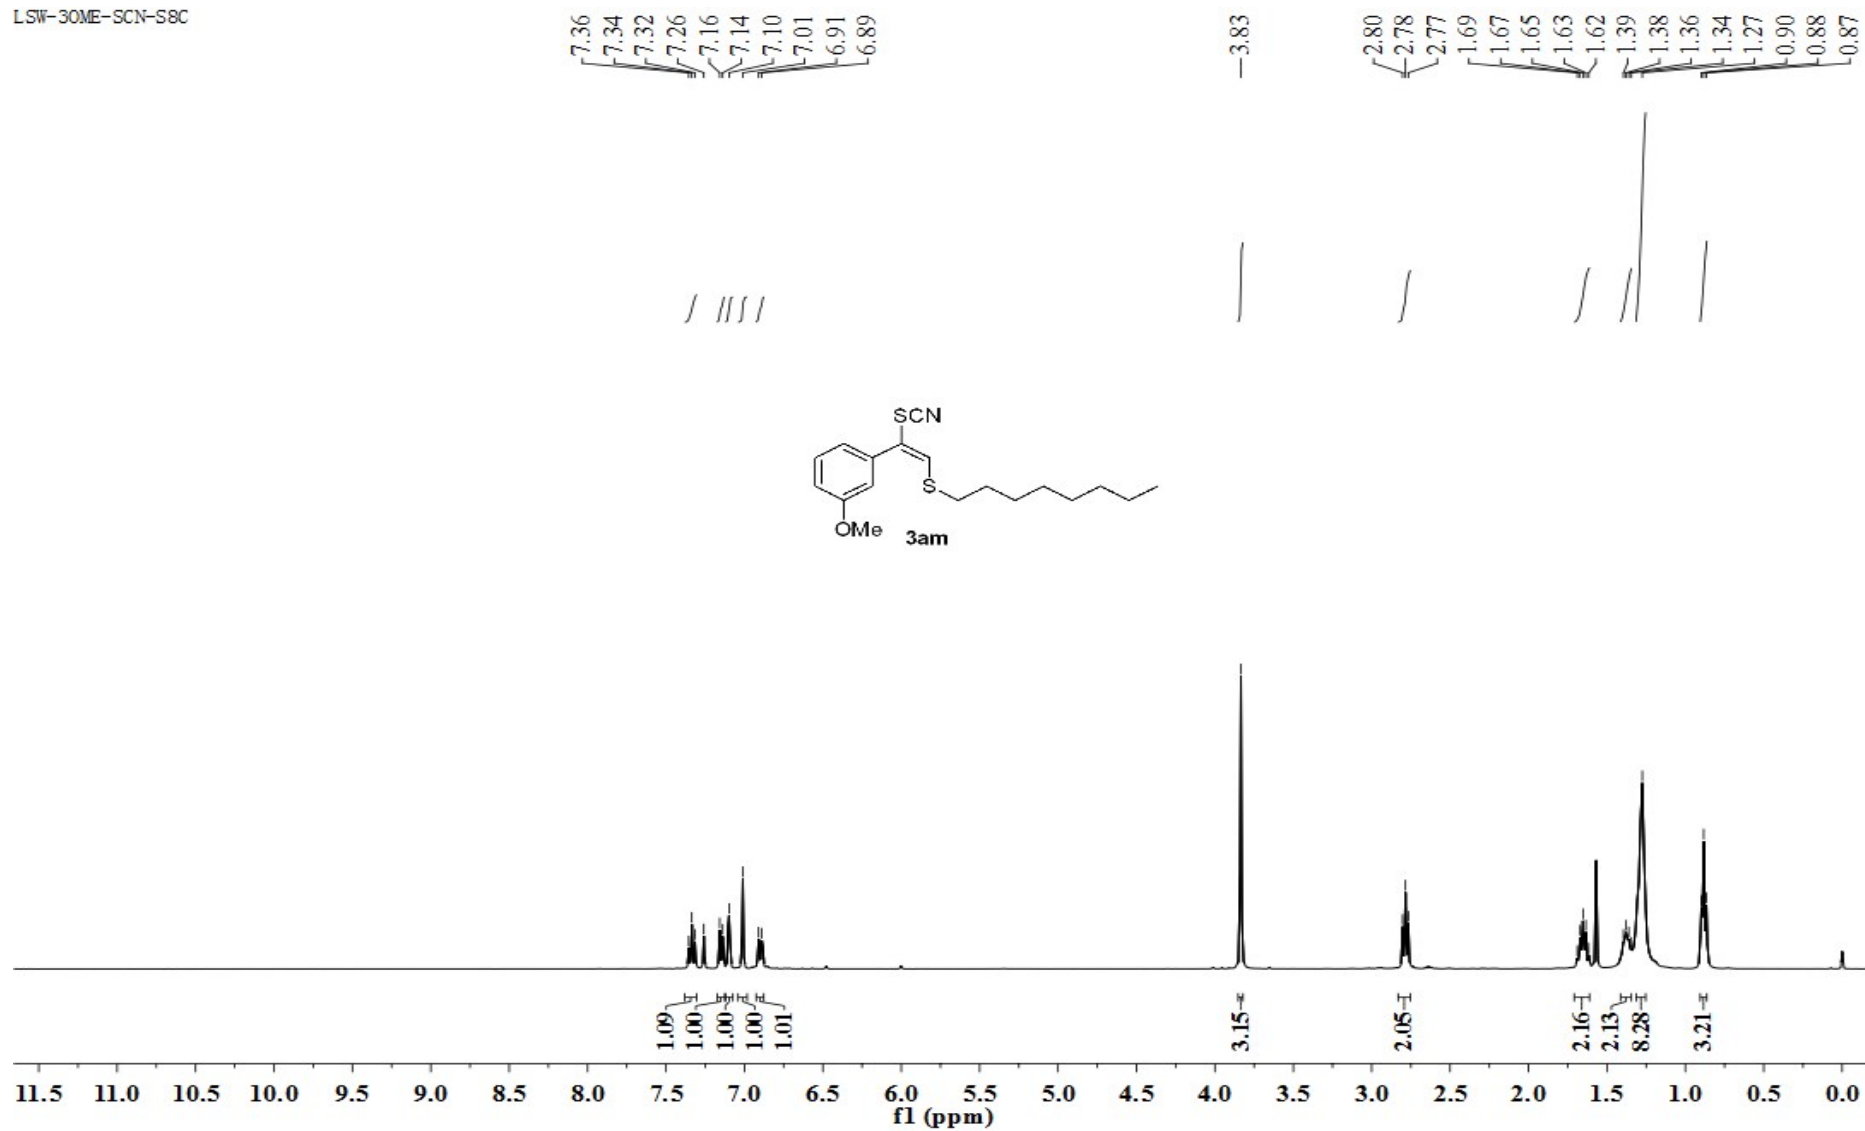

79.  $^{13}\text{C}$  NMR of **3am** (600 MHz,  $\text{CDCl}_3$ )

1sw-3ome-scn-s8c

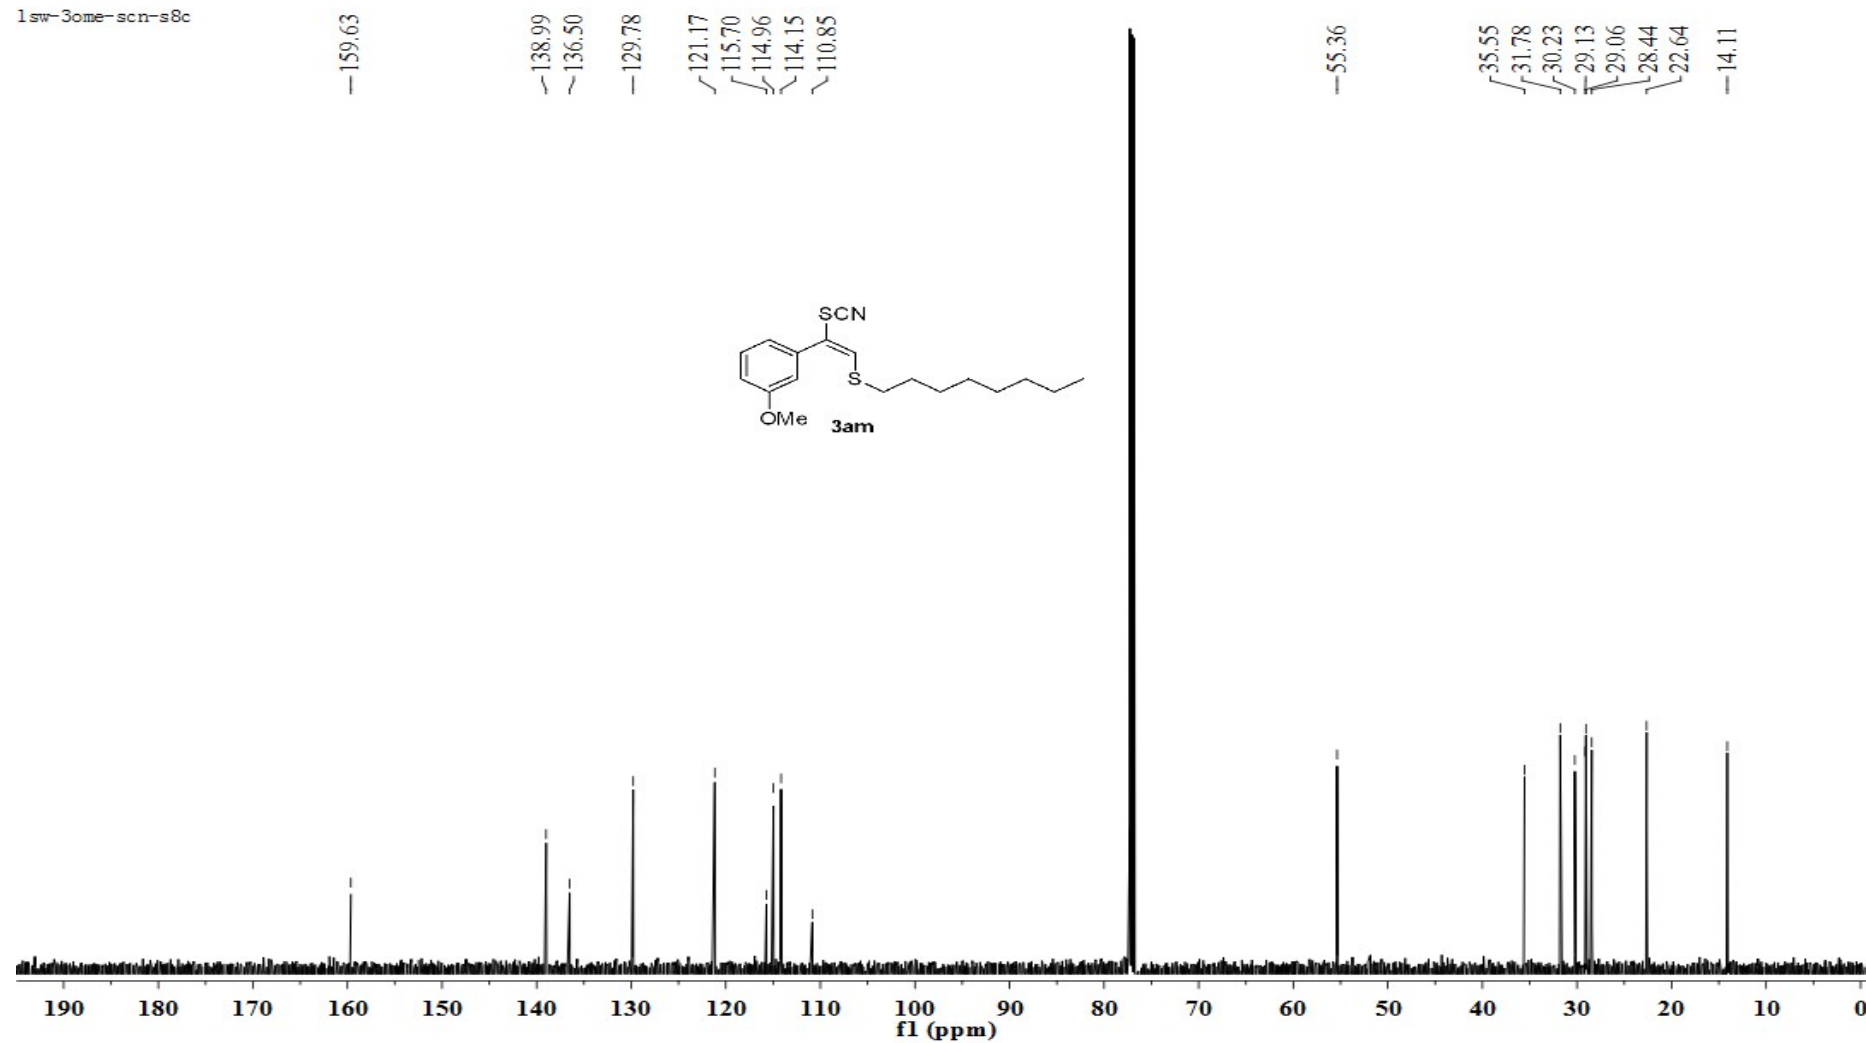

80. <sup>1</sup>H NMR of **3an** (600 MHz, CDCl<sub>3</sub>)

lsw-1-xin-scn-some

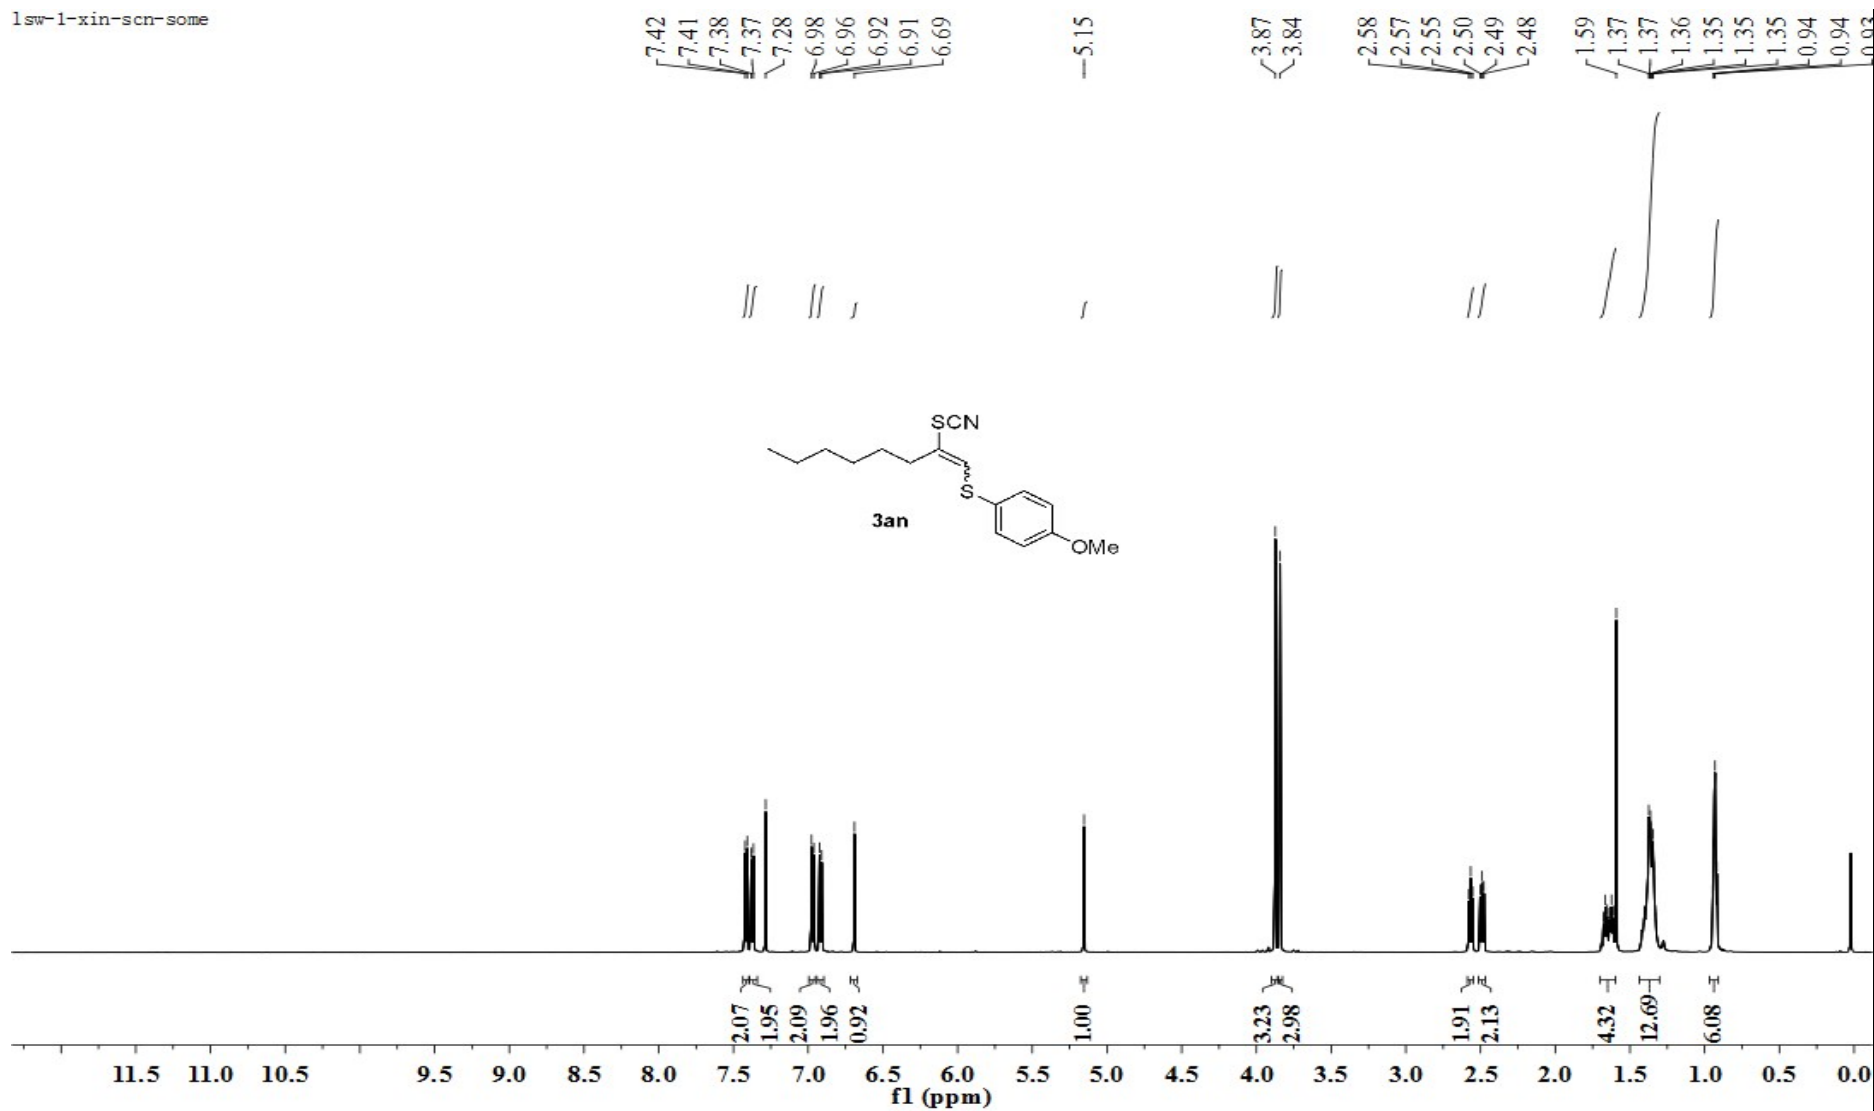

81.  $^{13}\text{C}$  NMR of **3an** (125 MHz,  $\text{CDCl}_3$ )

lsw-1-xin-scn-some

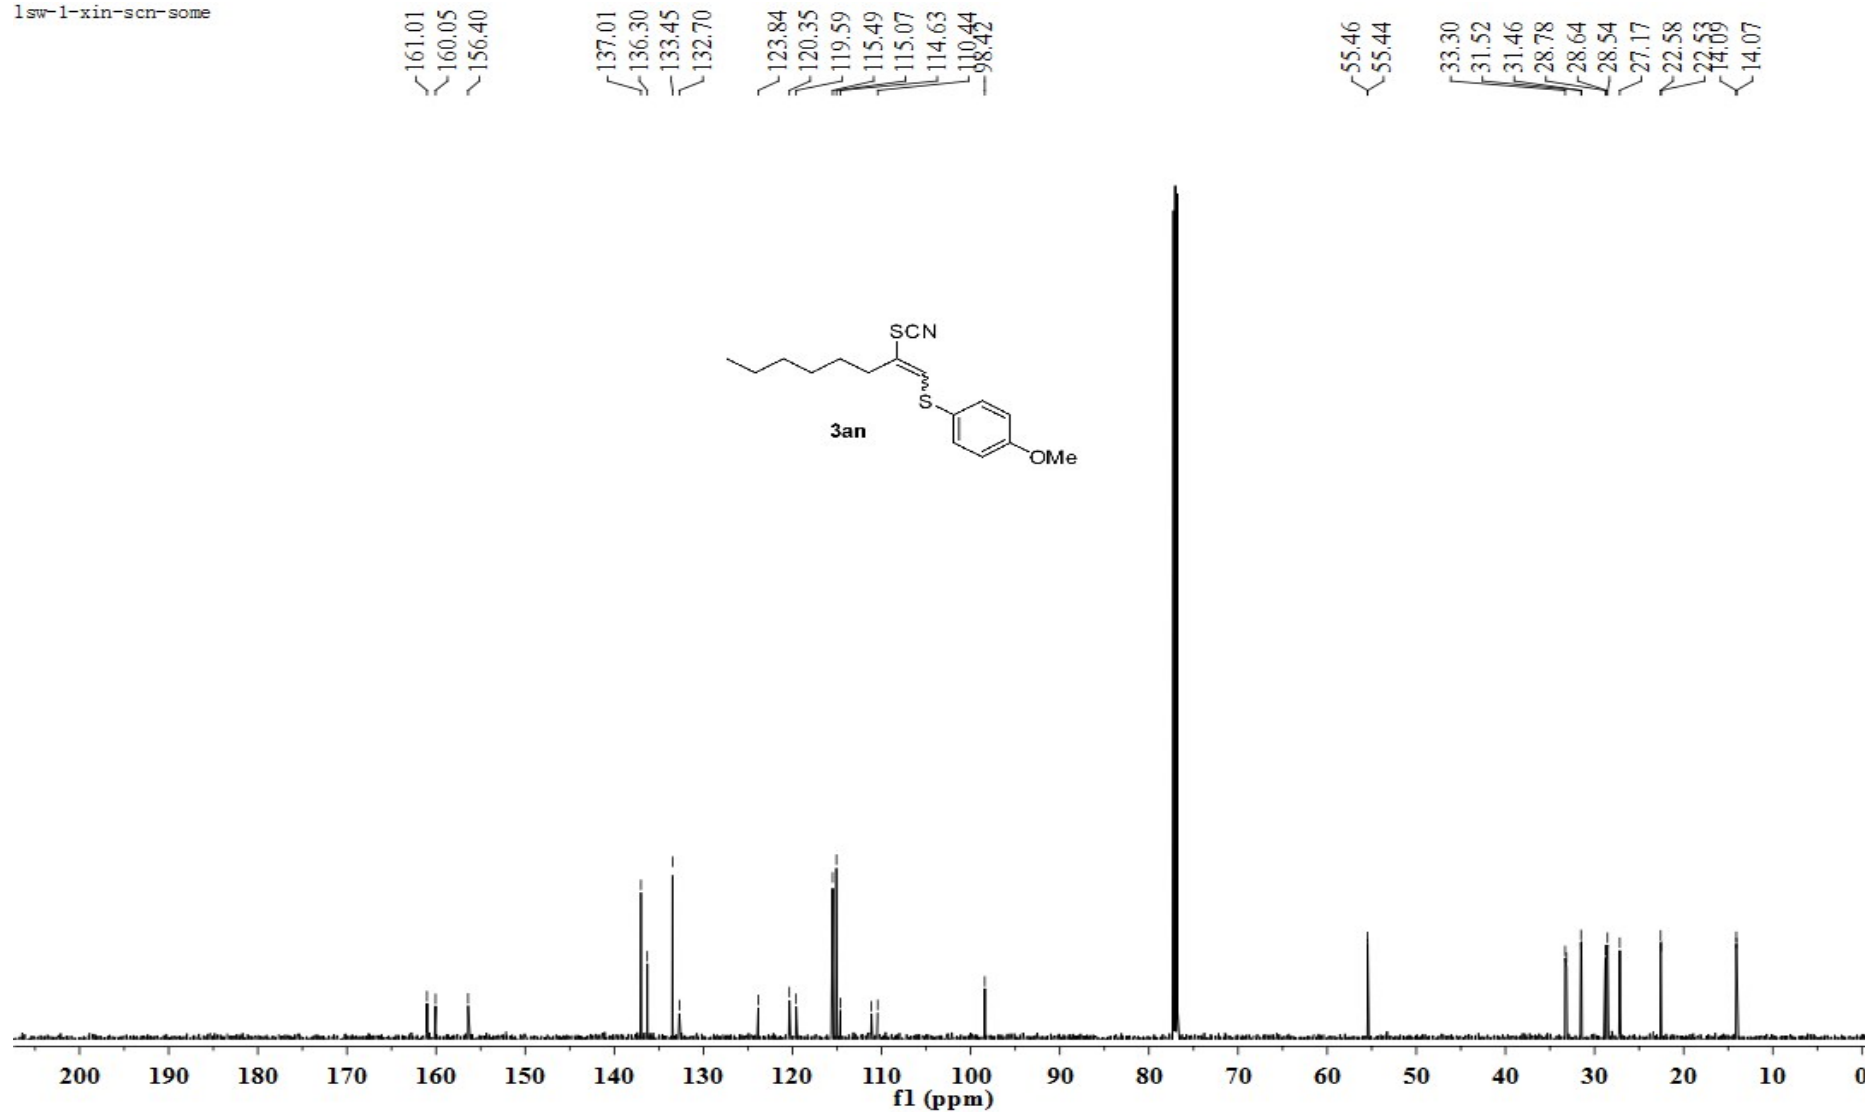



82. <sup>1</sup>H NMR of **3ao** (600 MHz, CDCl<sub>3</sub>)

LSW-1-ENE-3-OH-SCN-SPH

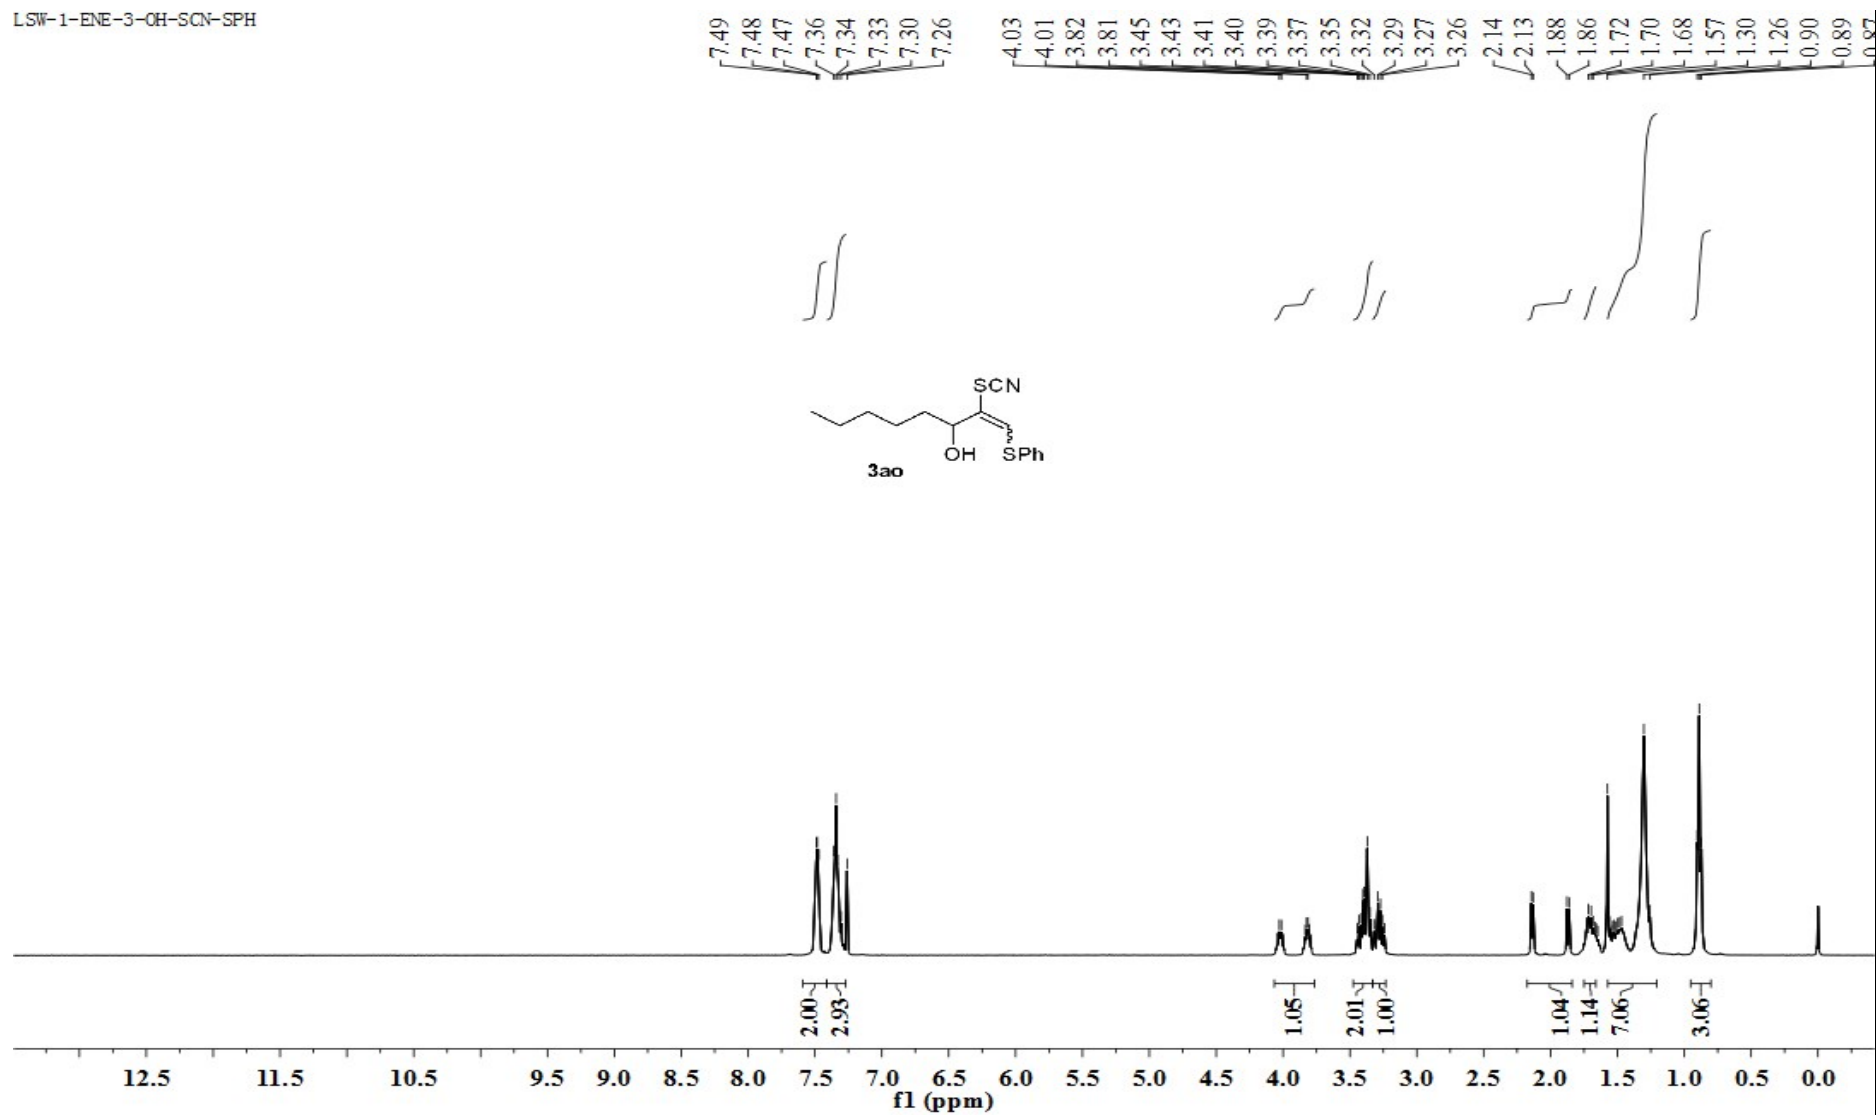

83. <sup>13</sup>C NMR of **3ao** (125 MHz, CDCl<sub>3</sub>)

LSW-1-XIN-3OH-ENE-SCN-SPH

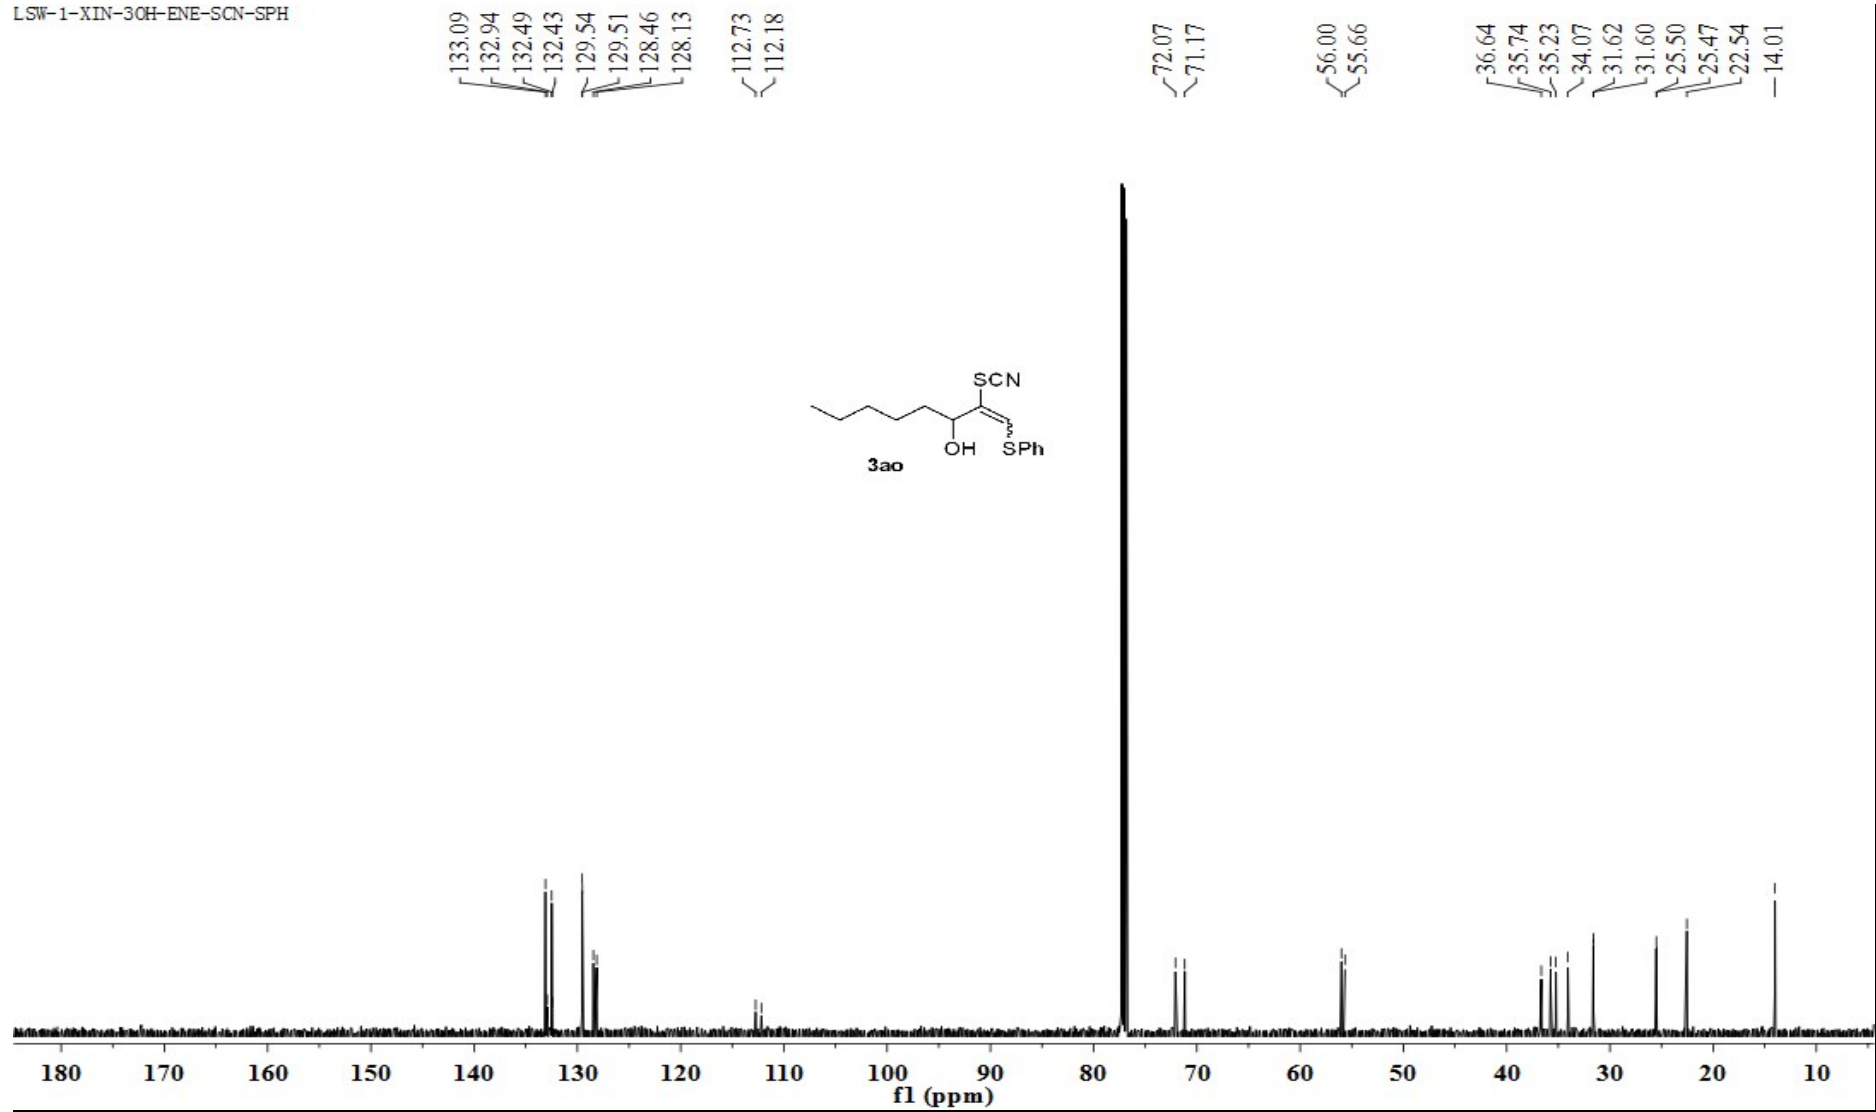

84. <sup>1</sup>H NMR of **3ap** (600 MHz, CDCl<sub>3</sub>)

LSW-4-XIN-SCN-SPH

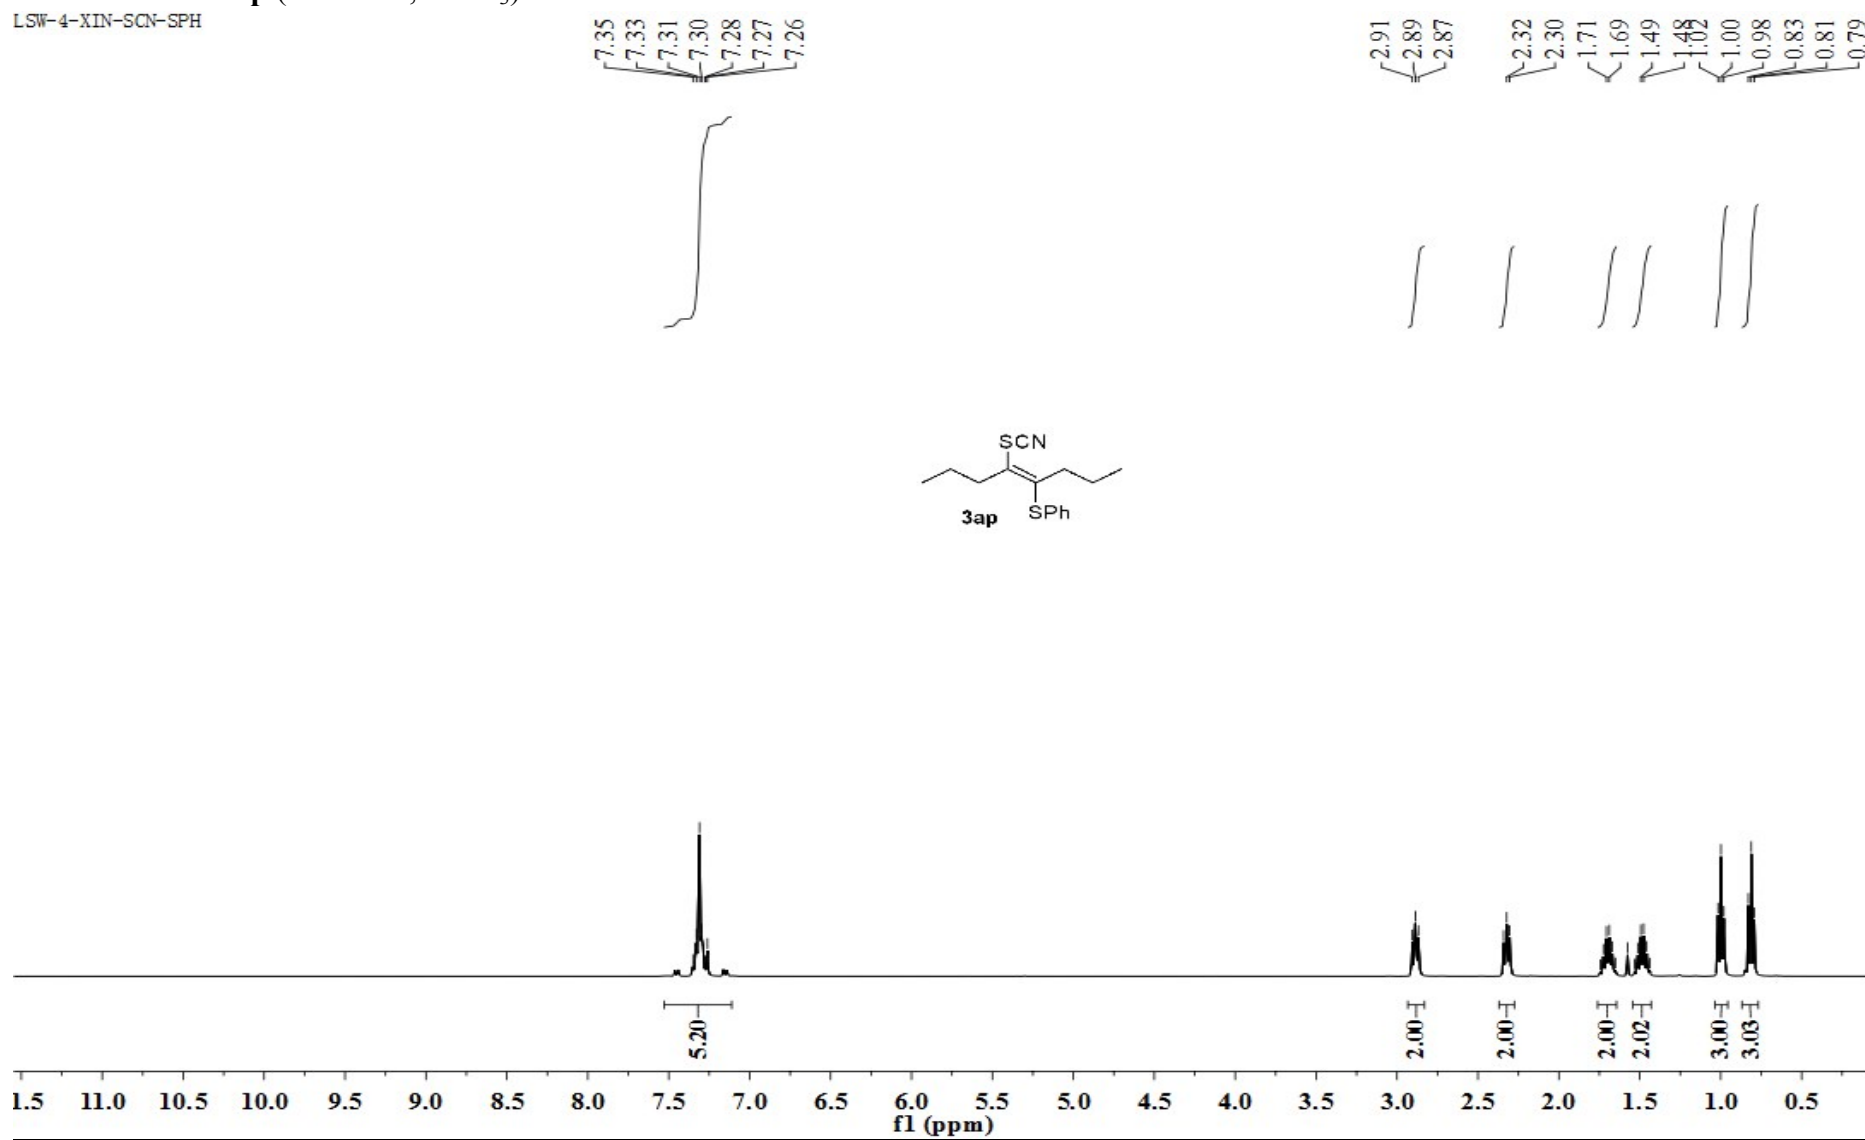

85.  $^{13}\text{C}$  NMR of **3ap** (125 MHz,  $\text{CDCl}_3$ )

LSW-4-XIN-SCN-SPH

142.10  
133.06  
131.63  
129.27  
127.77  
126.25

110.28

37.24  
36.14

21.84  
21.75

13.43  
13.39

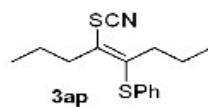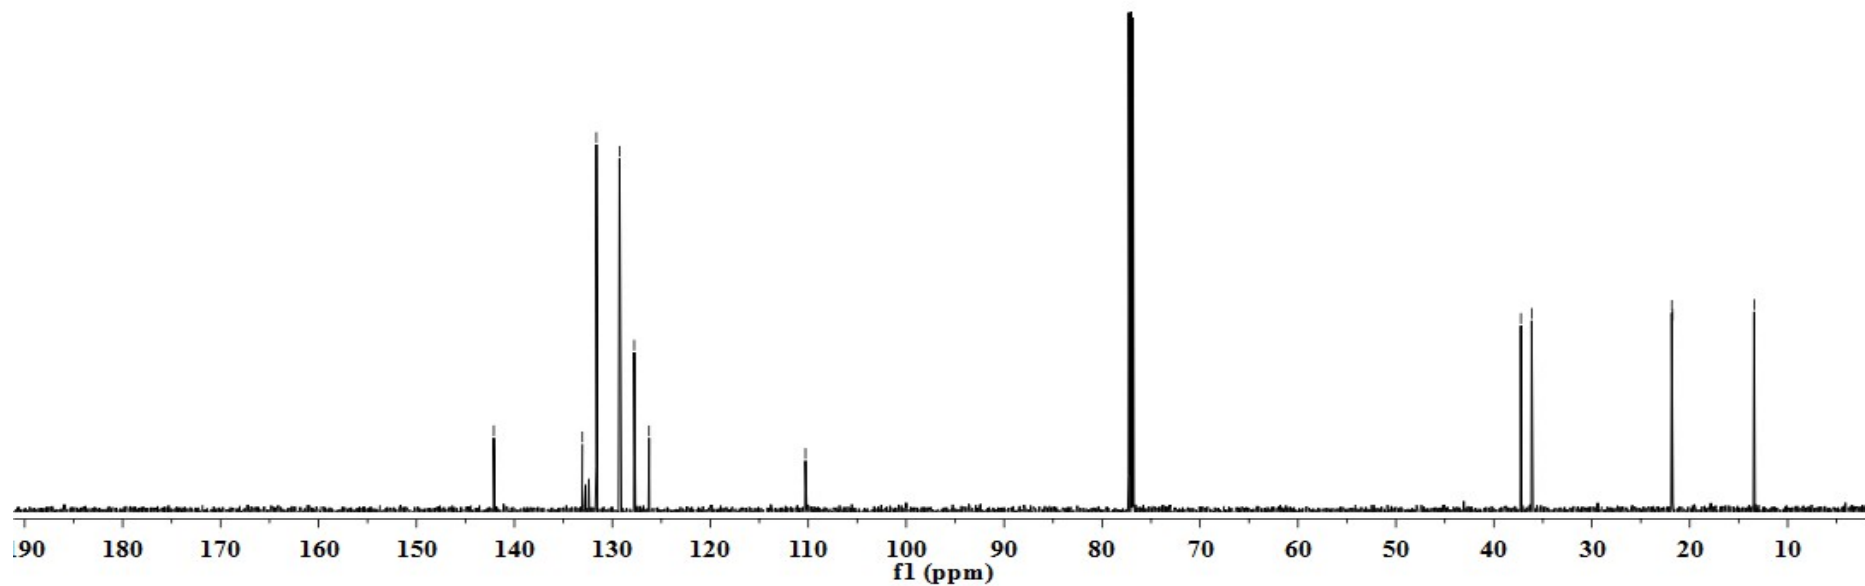

86.  $^1\text{H}$  NMR of **3aq** (600 MHz,  $\text{CDCl}_3$ )

LSW-4PH-CN-S4BR

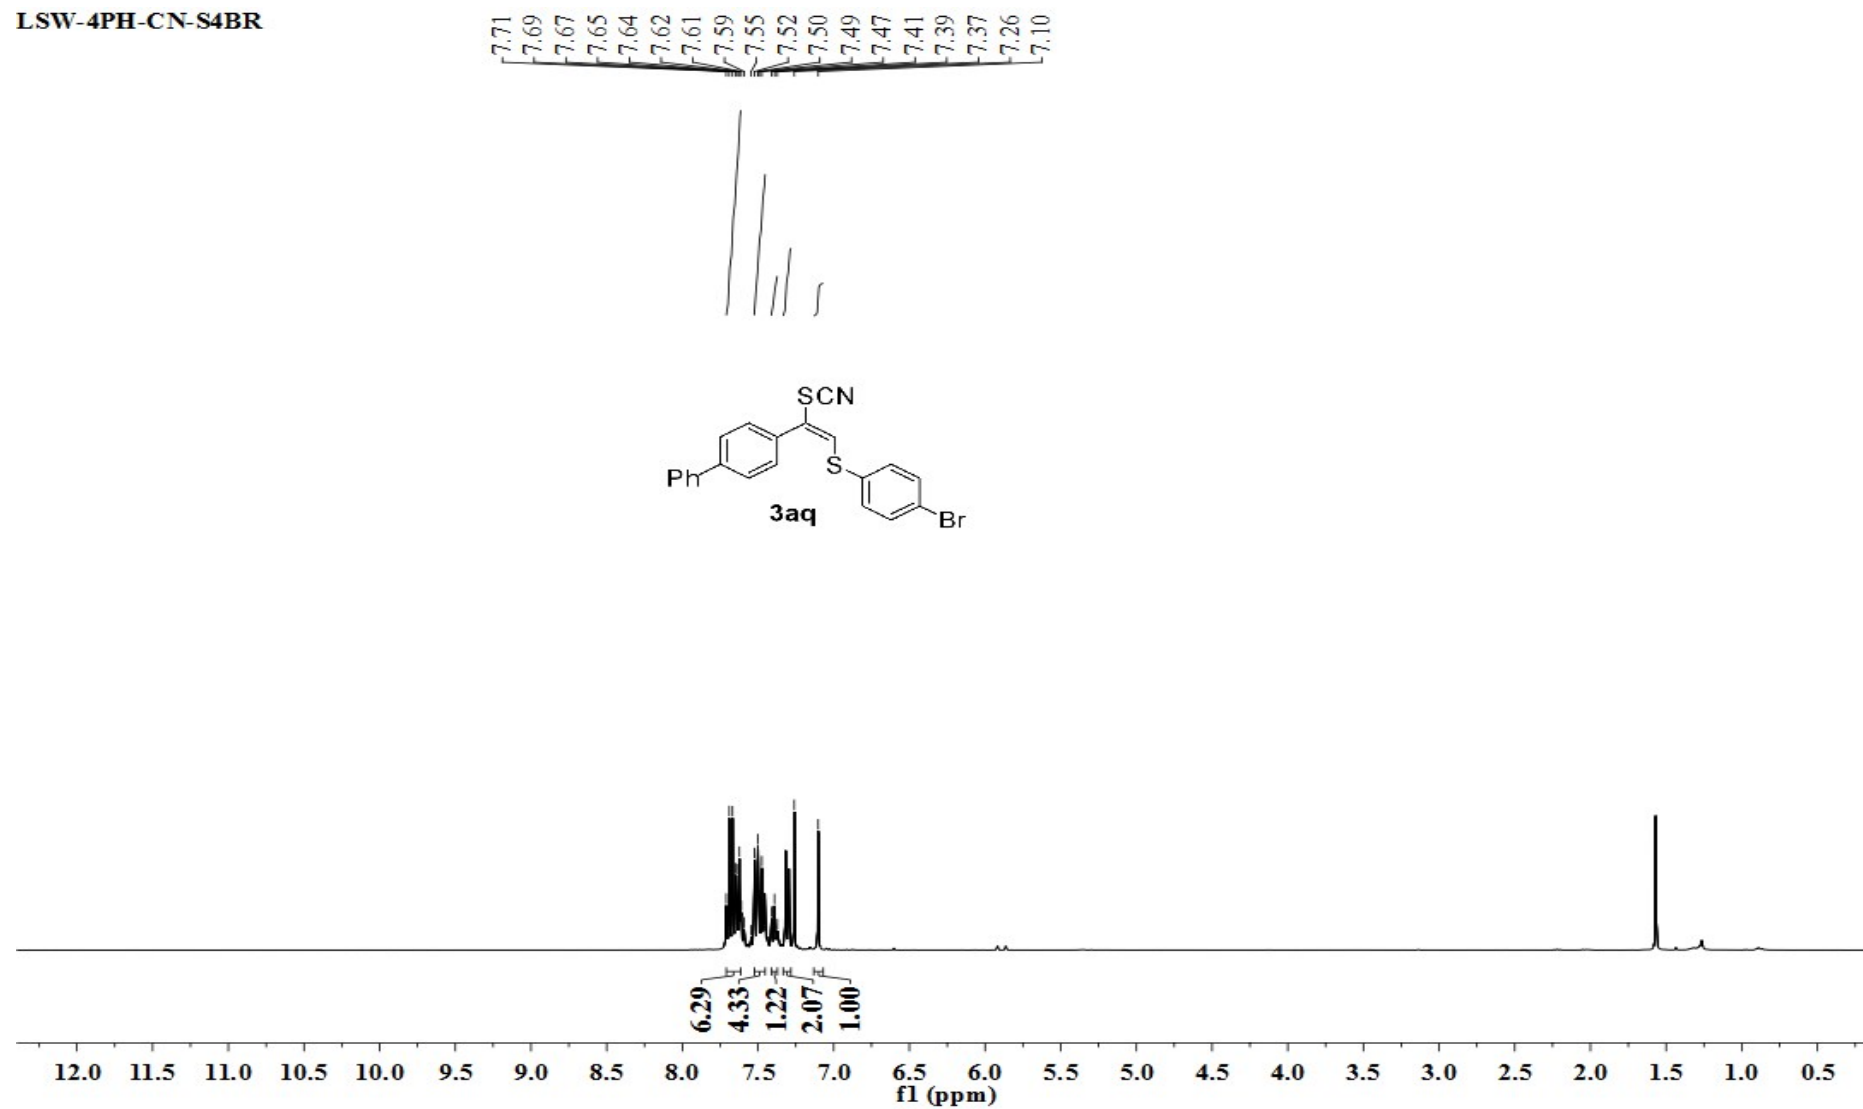

87.  $^{13}\text{C}$  NMR of **3aq** (125 MHz,  $\text{CDCl}_3$ )

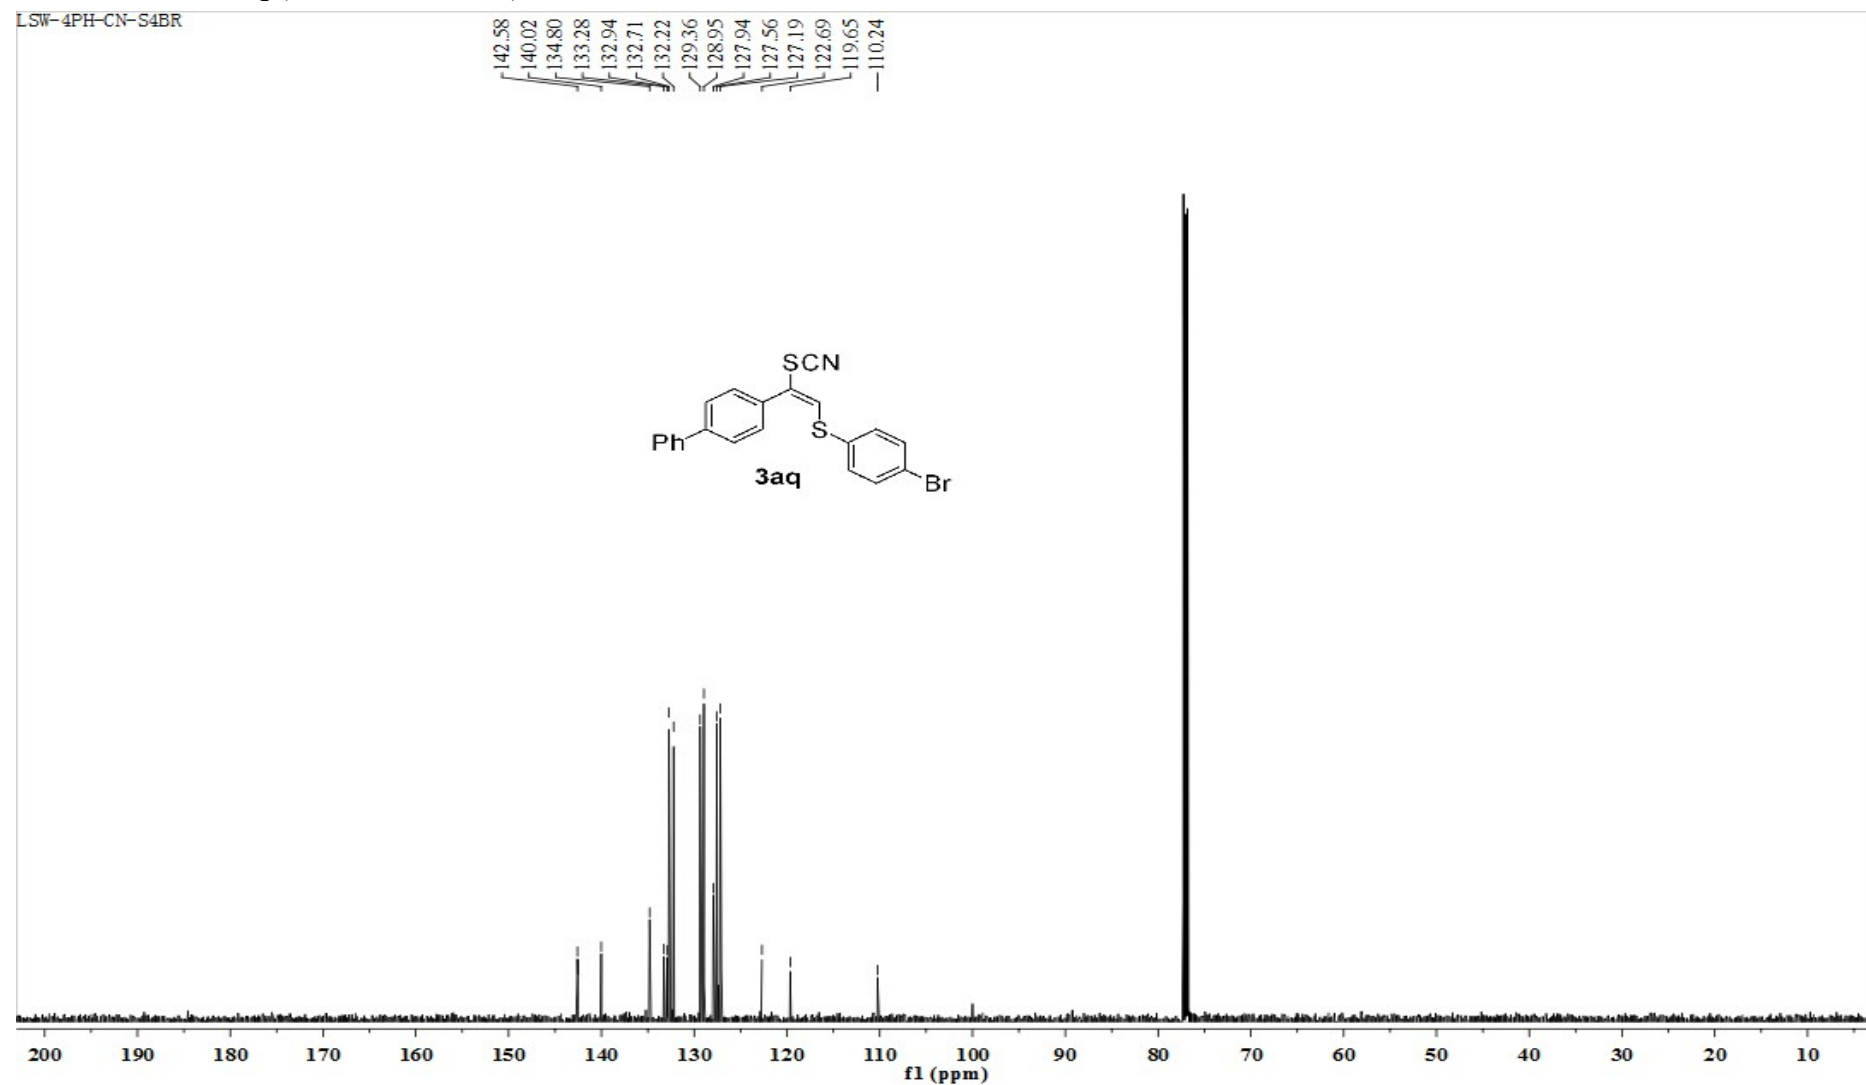

88. <sup>1</sup>H NMR of **5a** (600 MHz, CDCl<sub>3</sub>)

LSW-STRENE-SCN-SPH

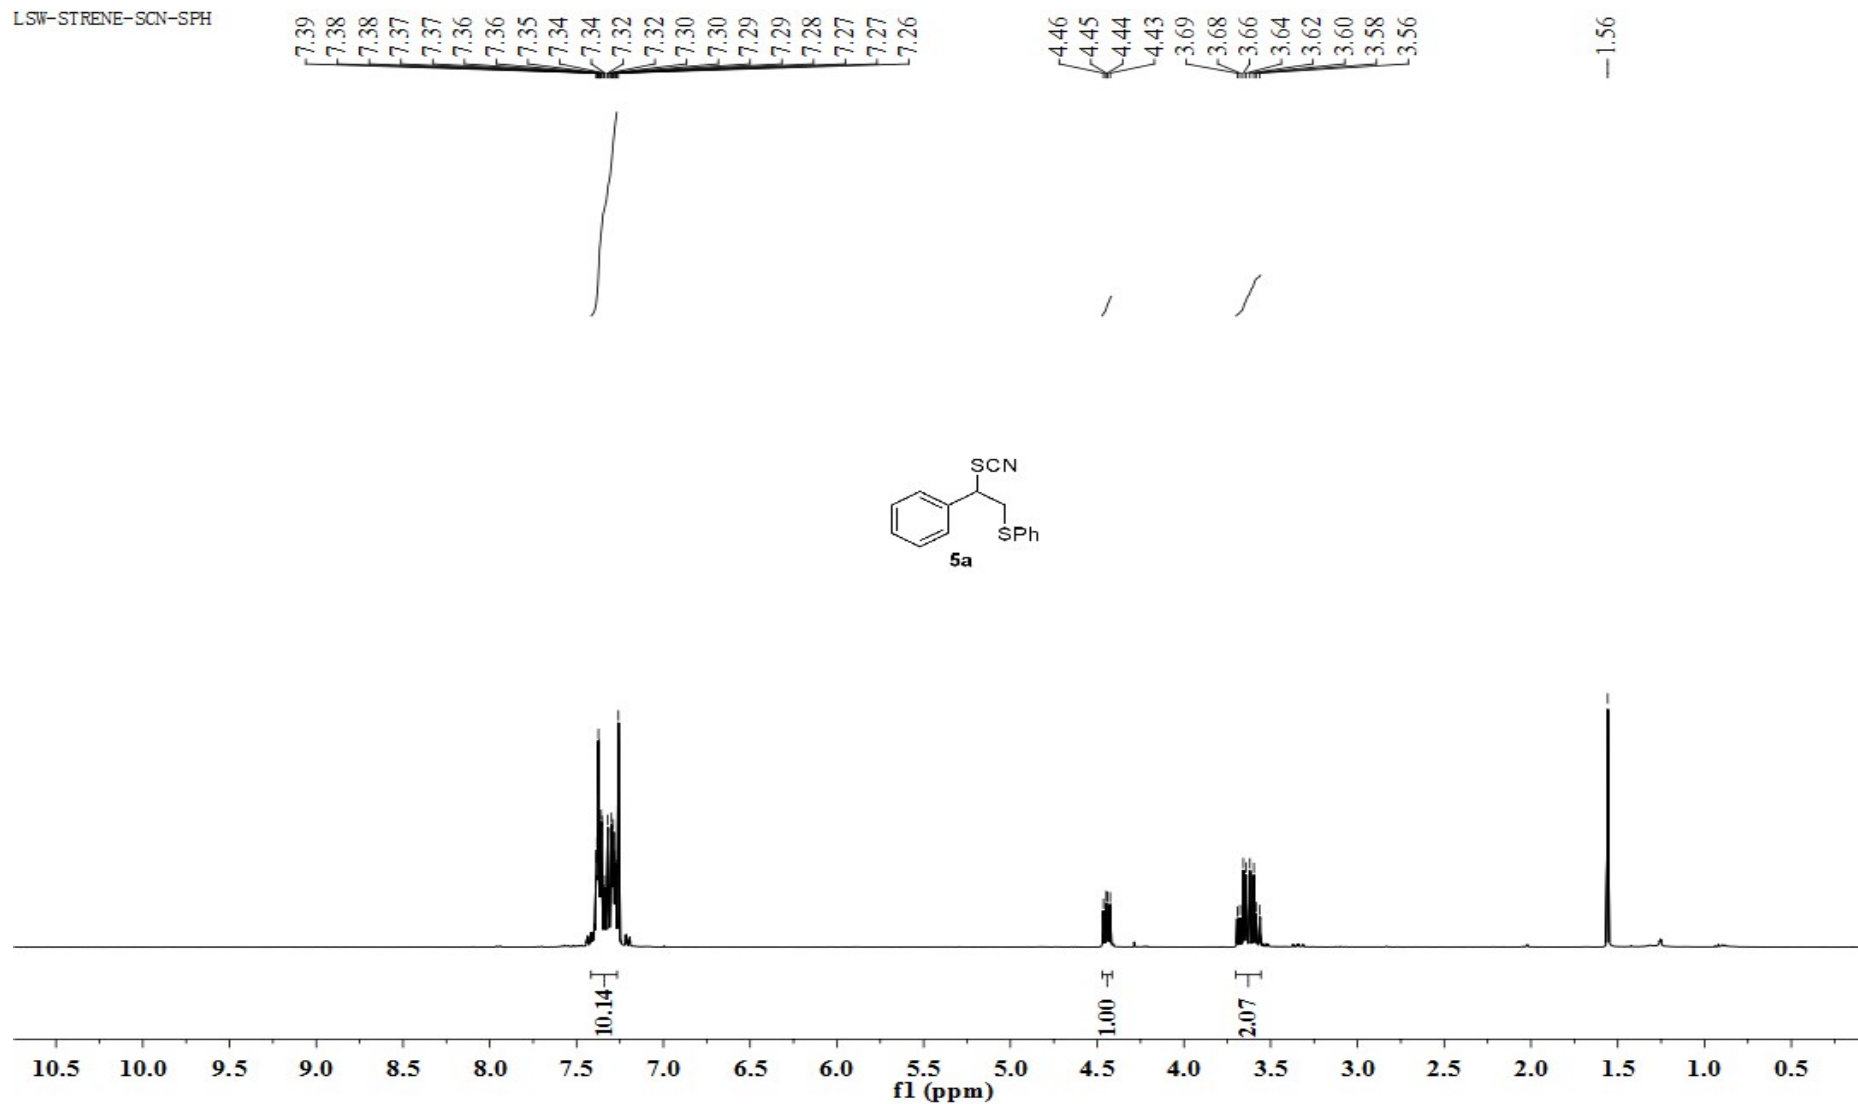

89.  $^{13}\text{C}$  NMR of **5a** (125 MHz,  $\text{CDCl}_3$ )

LSW-STRENE-SCN-SPH

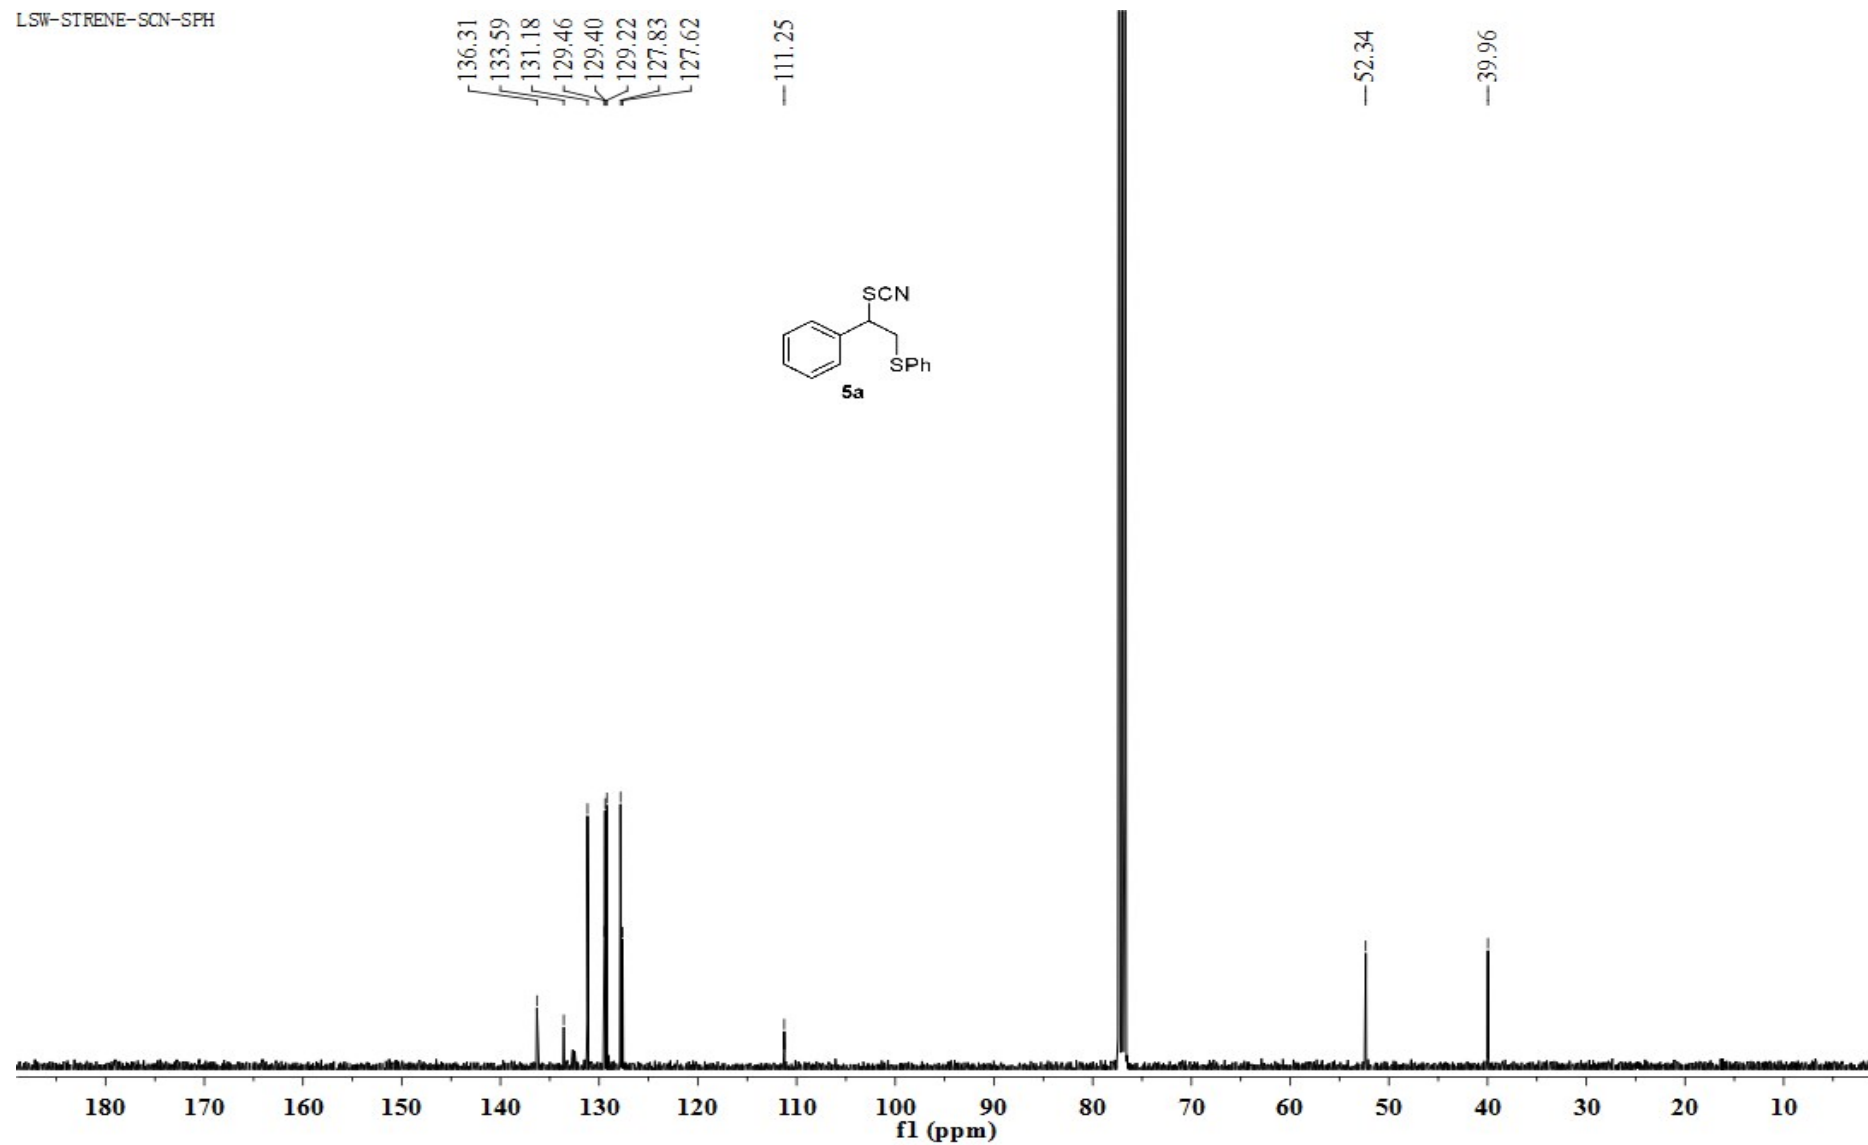



90. <sup>1</sup>H NMR of **5b** (600 MHz, CDCl<sub>3</sub>)

LSW-2CL-ENE-SCN-SPH

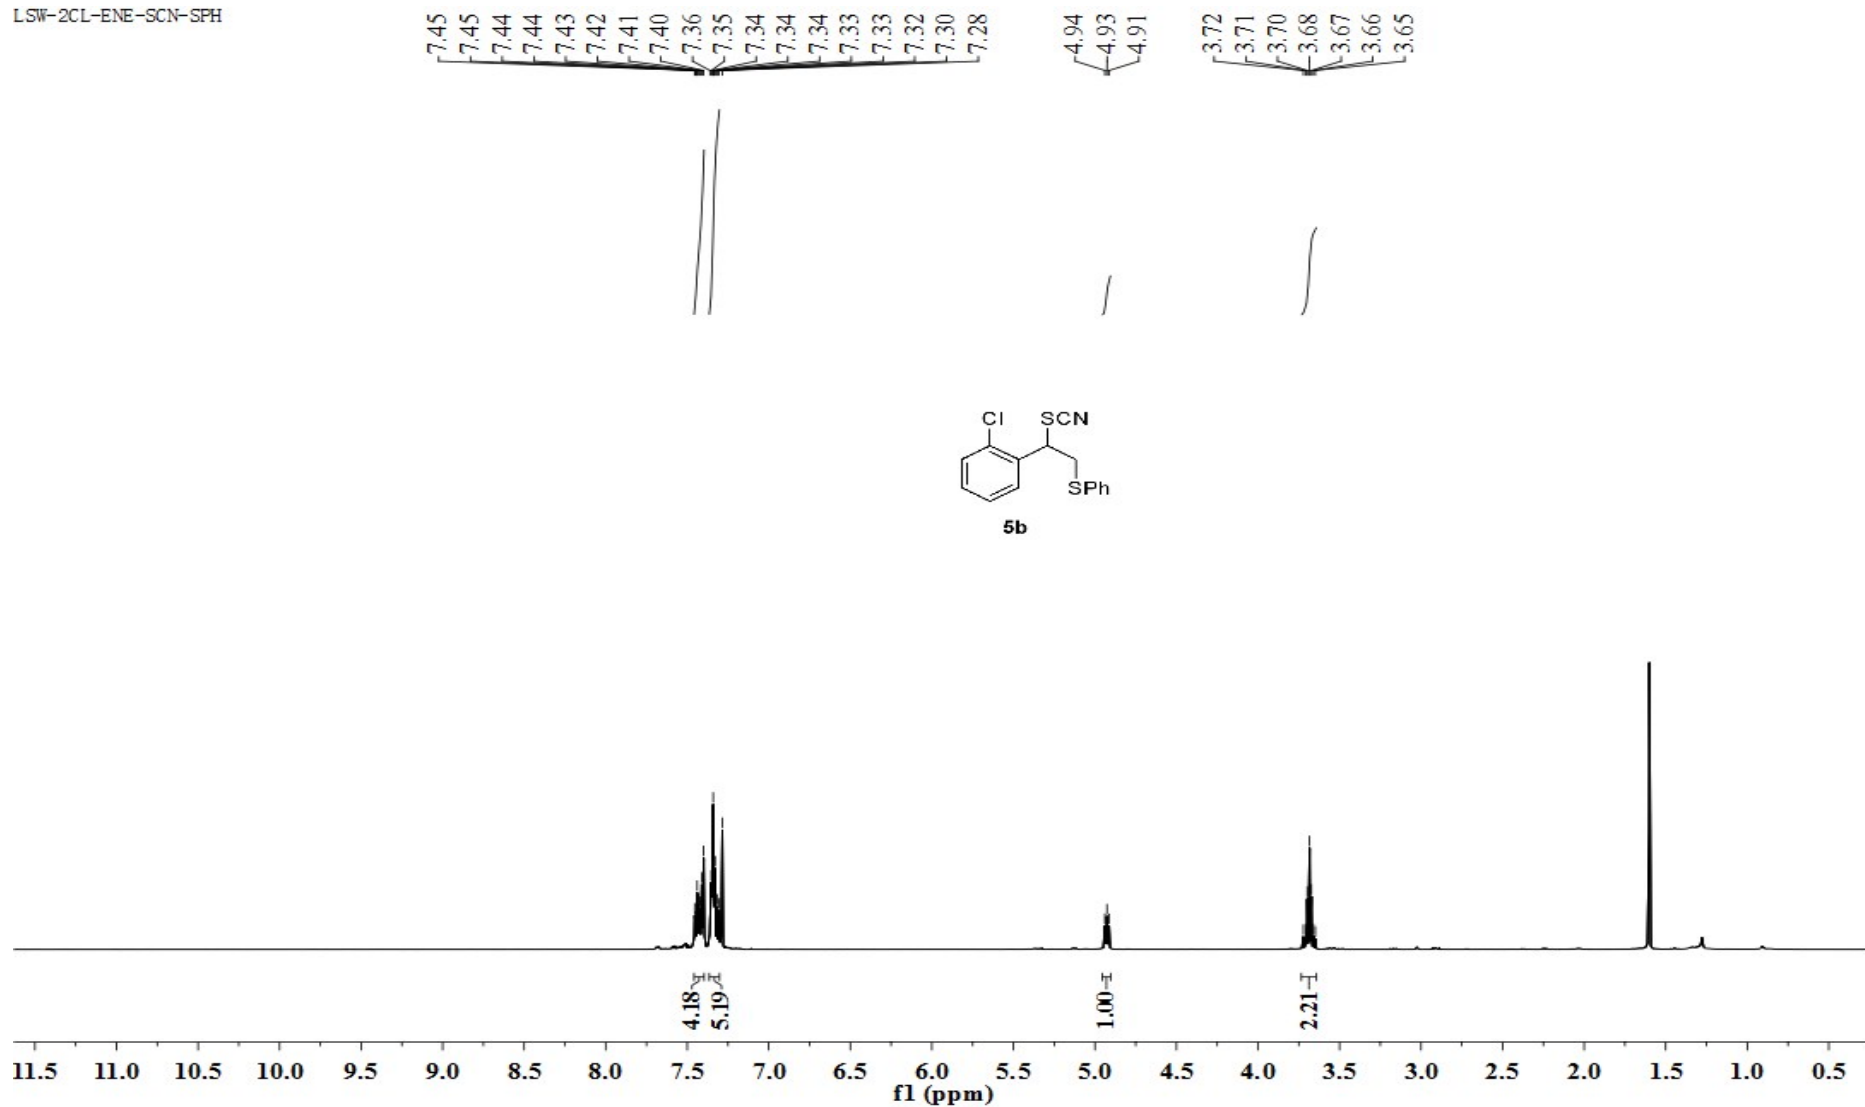

91.  $^{13}\text{C}$  NMR of **5b** (125 MHz,  $\text{CDCl}_3$ )

LSW-2CL-ENE-SCN-SPh

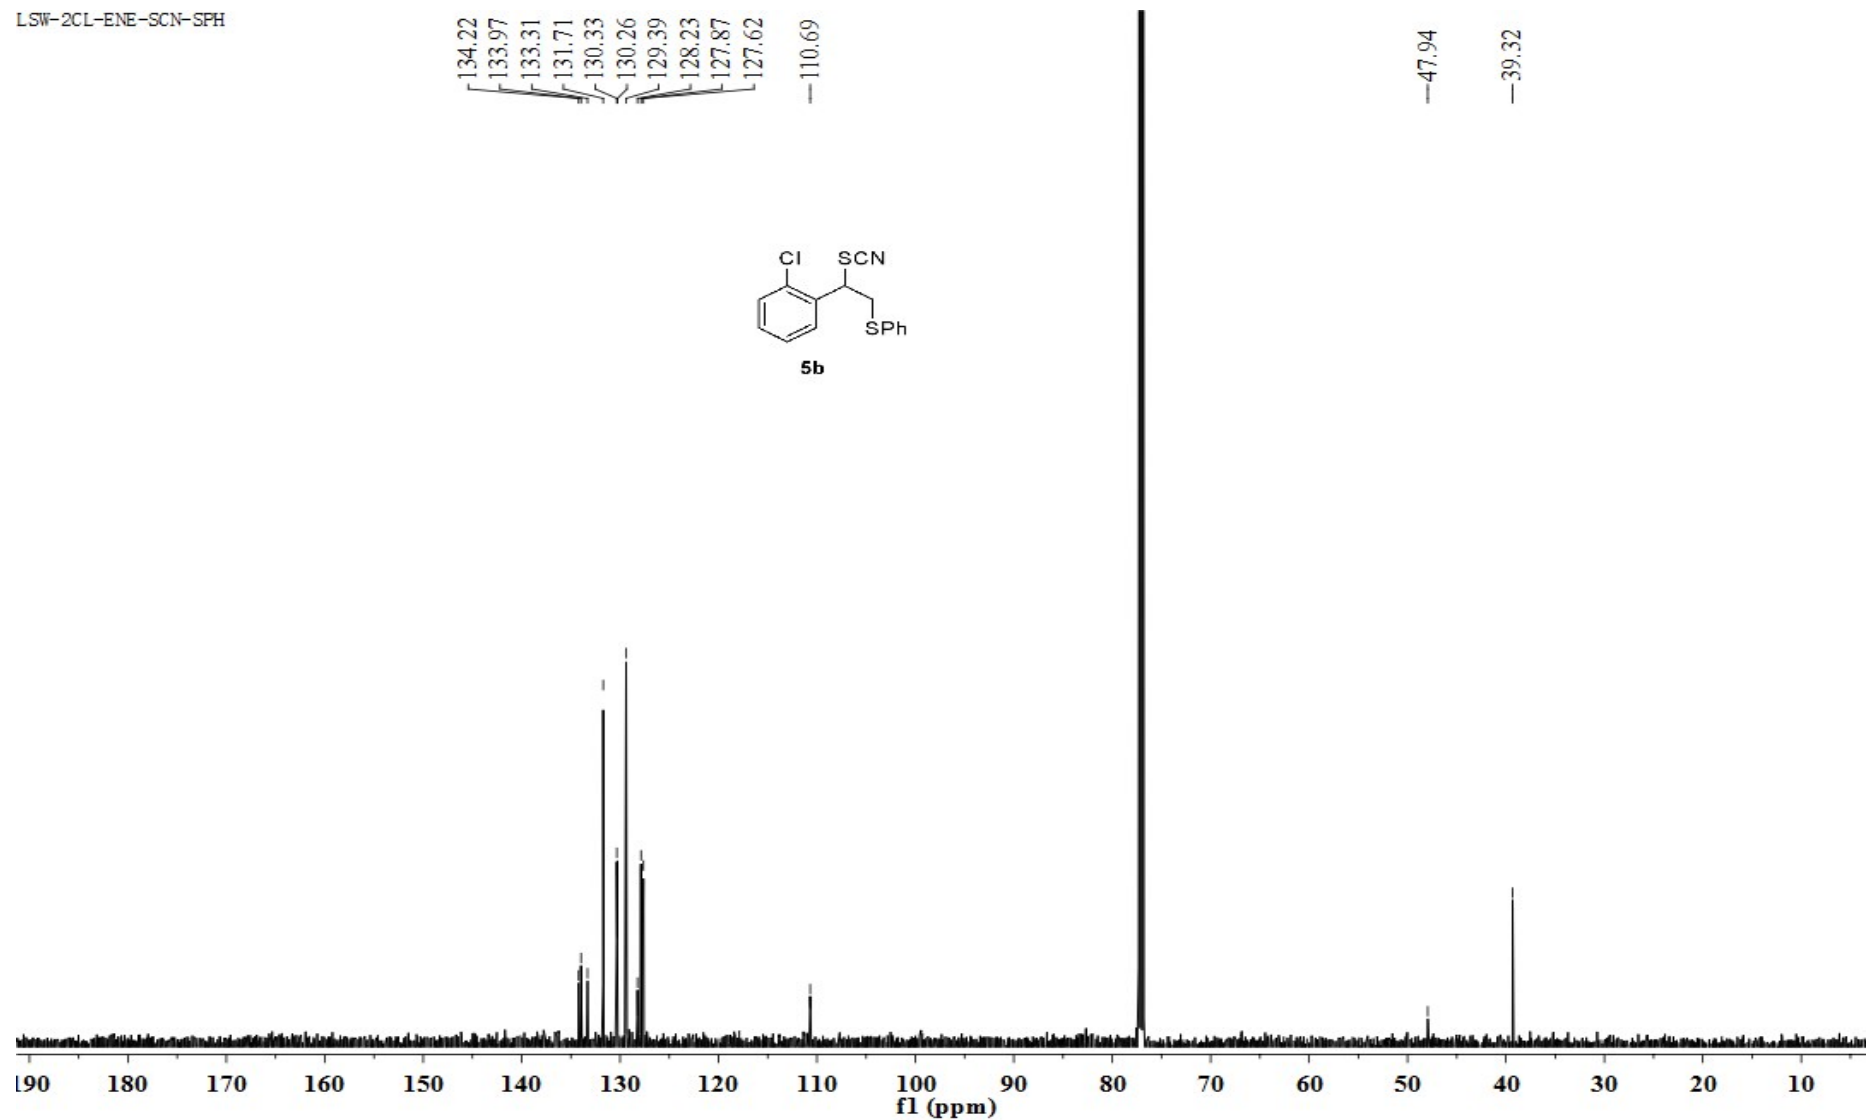

92. <sup>1</sup>H NMR of **5c** (600 MHz, CDCl<sub>3</sub>)

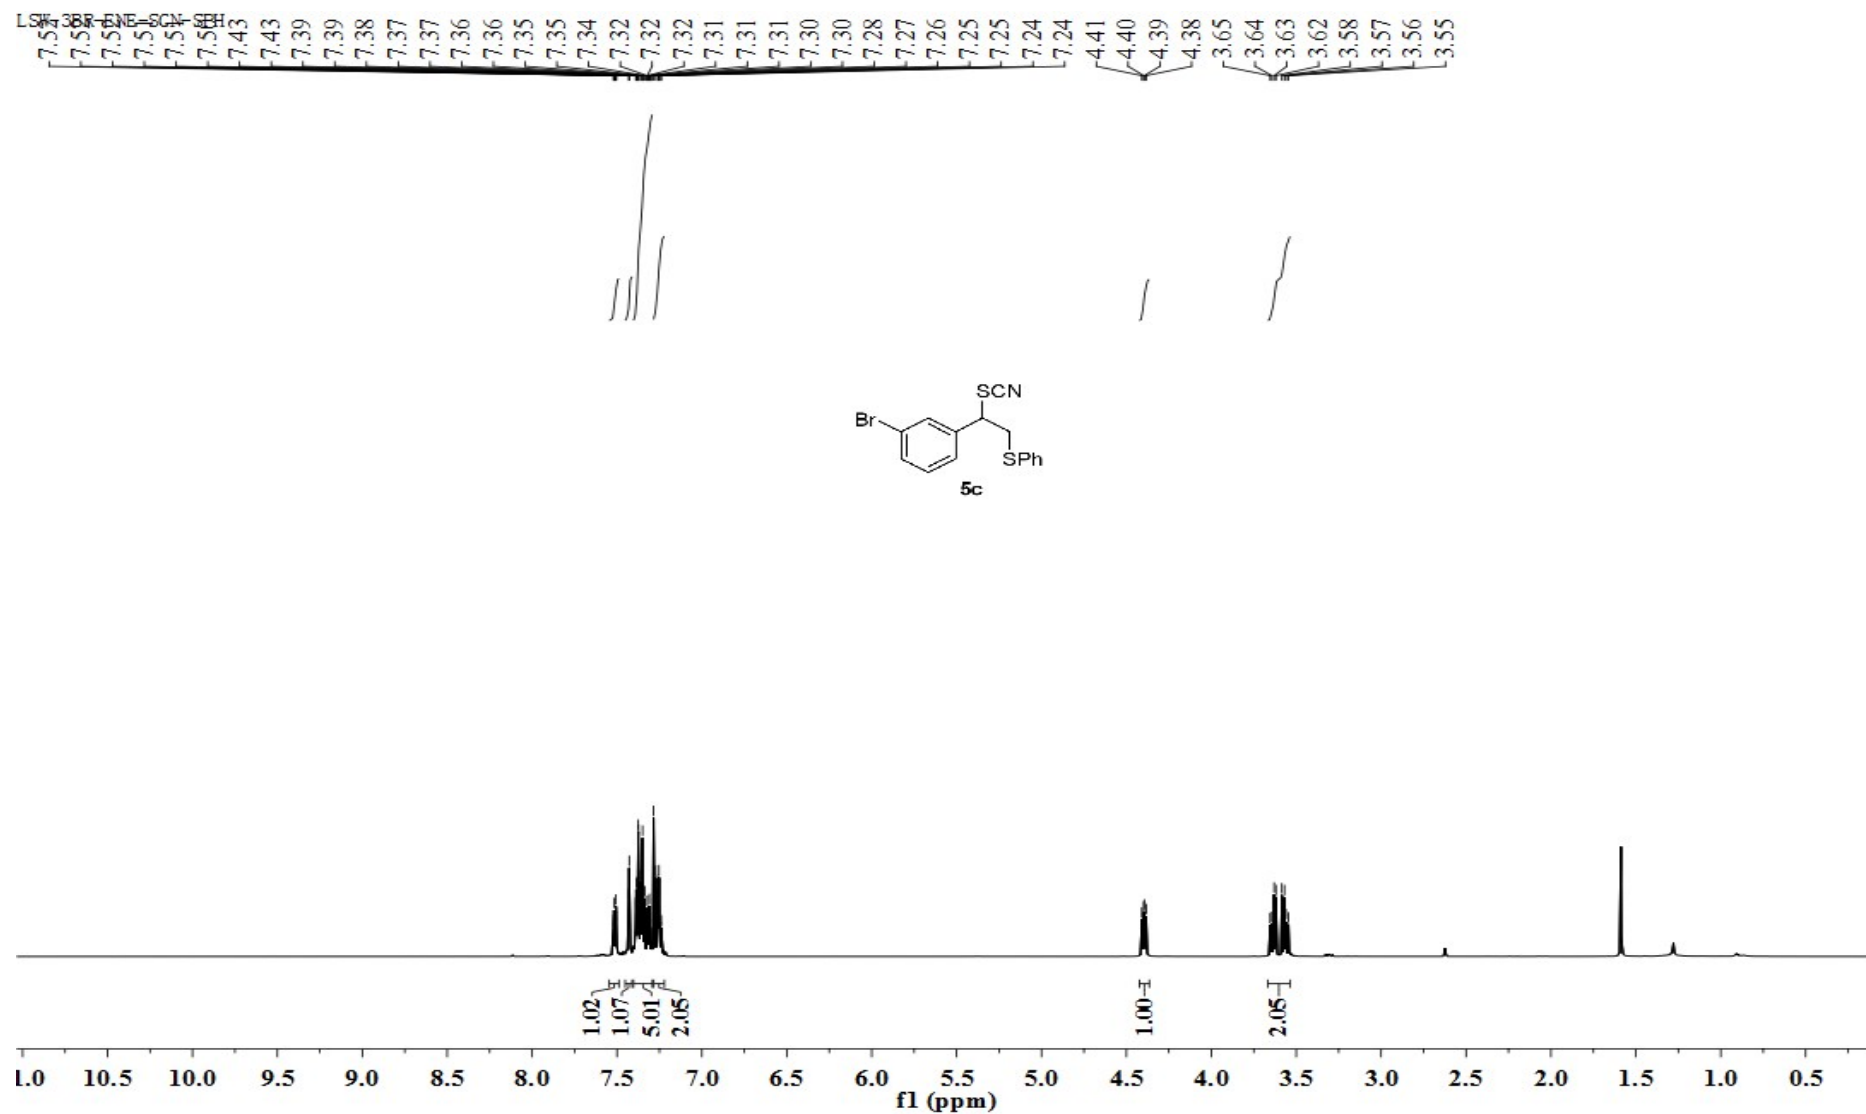

93.  $^{13}\text{C}$  NMR of **5c** (125 MHz,  $\text{CDCl}_3$ )

LSW-3BR-ENE-SCN-SPH

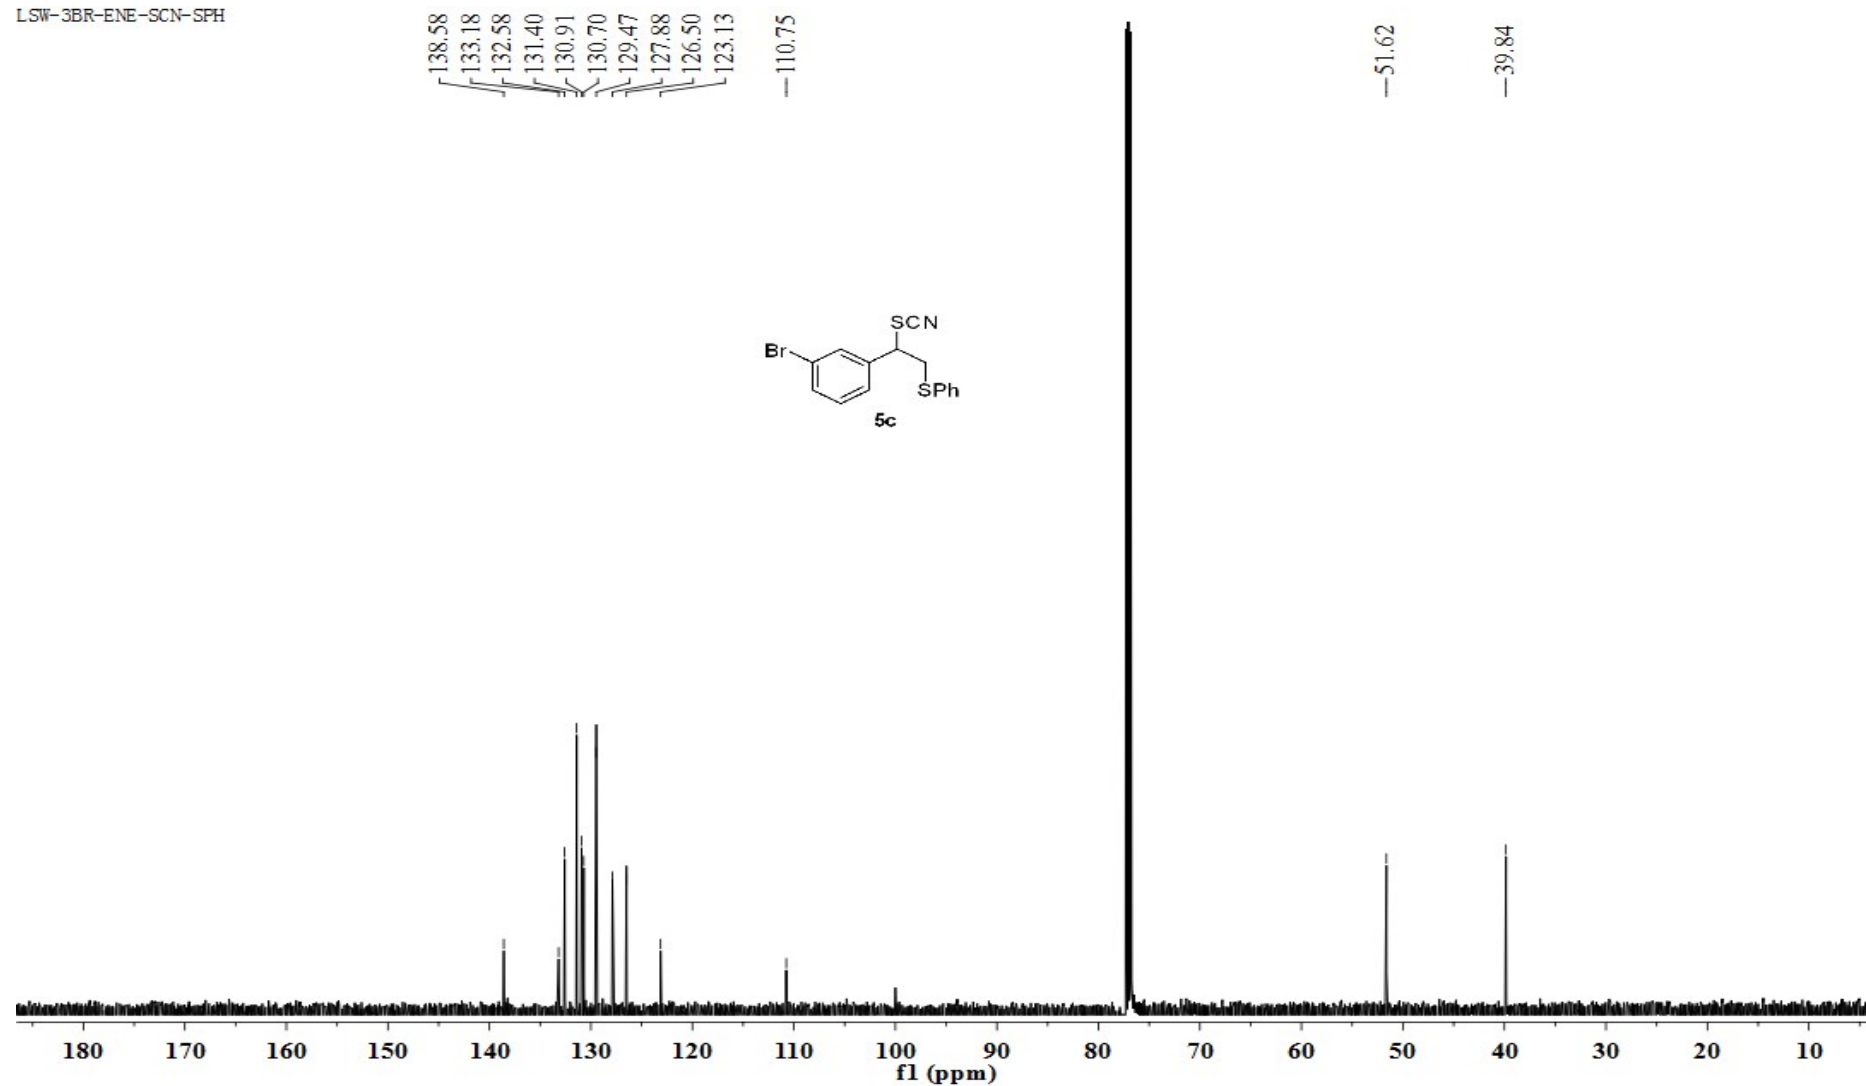

94. <sup>1</sup>H NMR of **5d** (600 MHz, CDCl<sub>3</sub>)

LSW-4BR-ENE-SCN-SPH

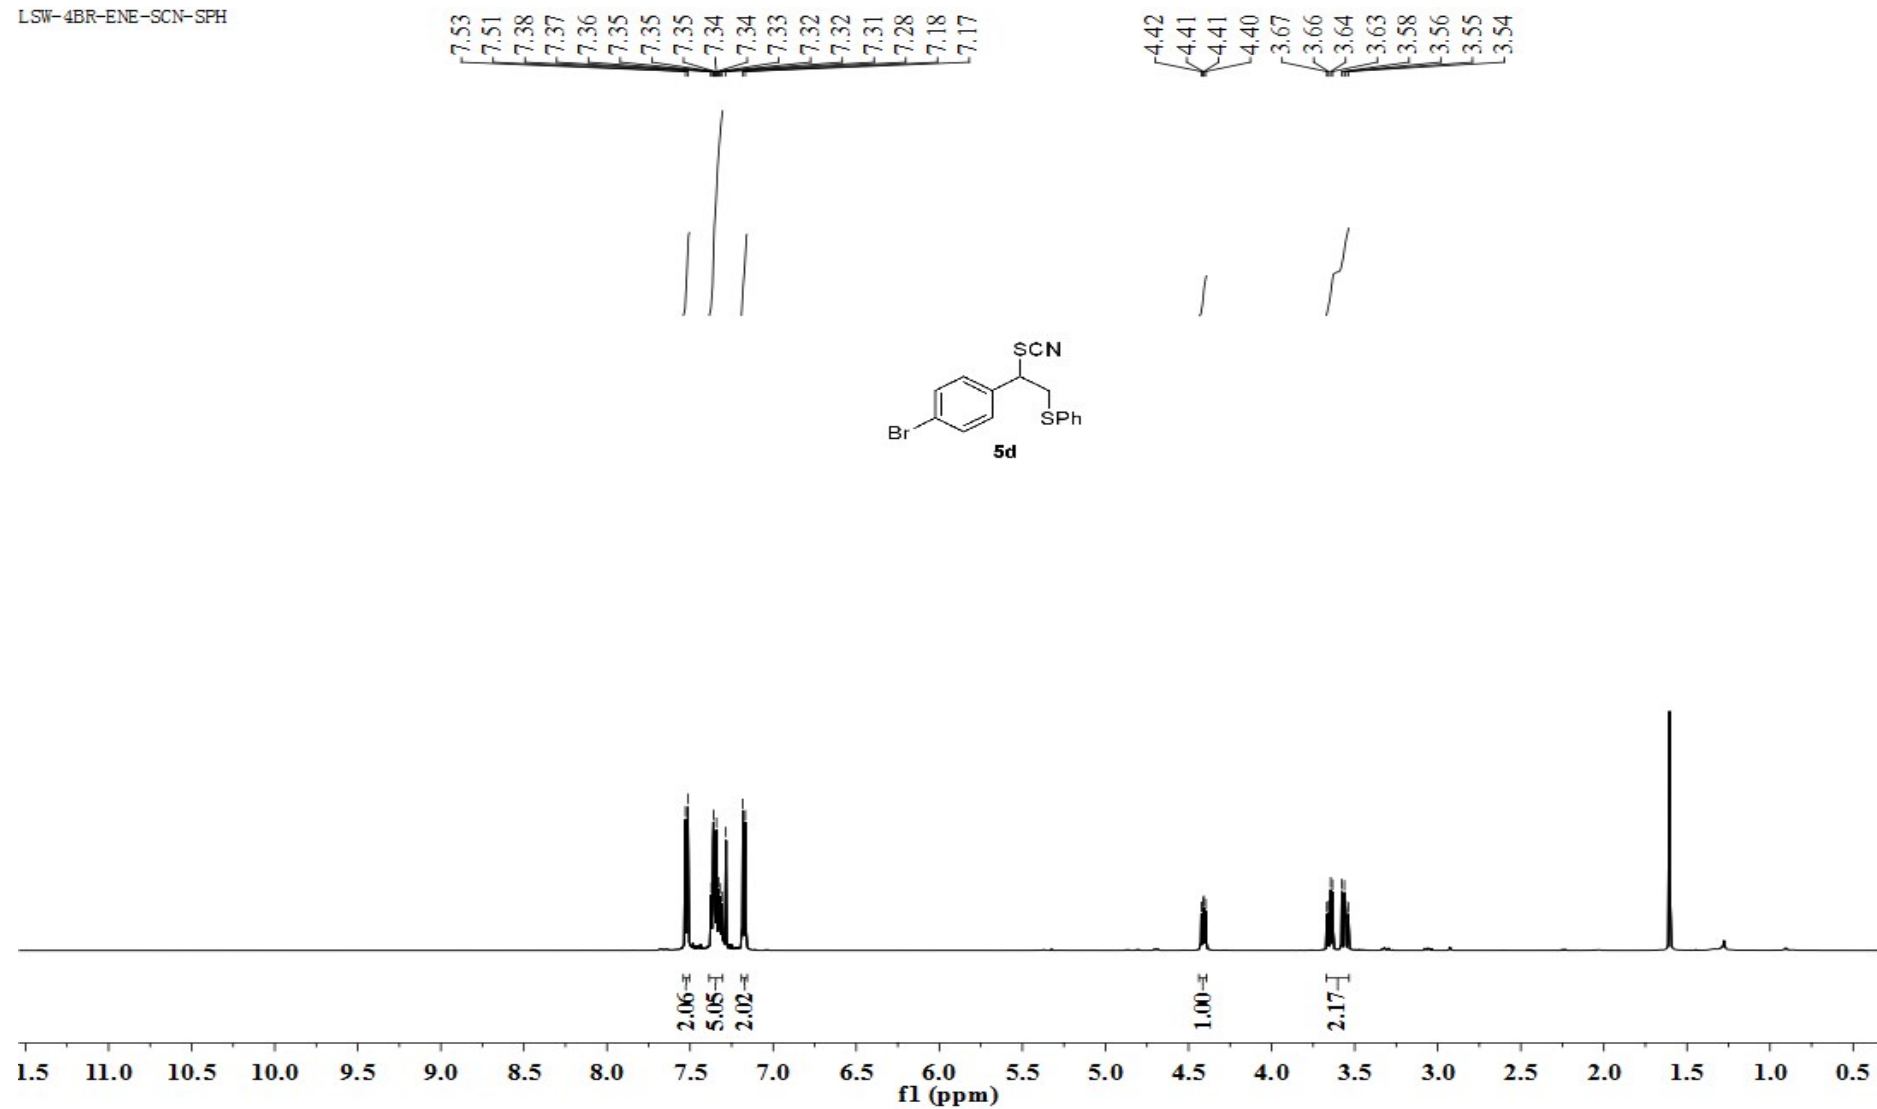

95. <sup>13</sup>C NMR of **5d** (125 MHz, CDCl<sub>3</sub>)

LSW-4BR-ENE-SCN-SPH

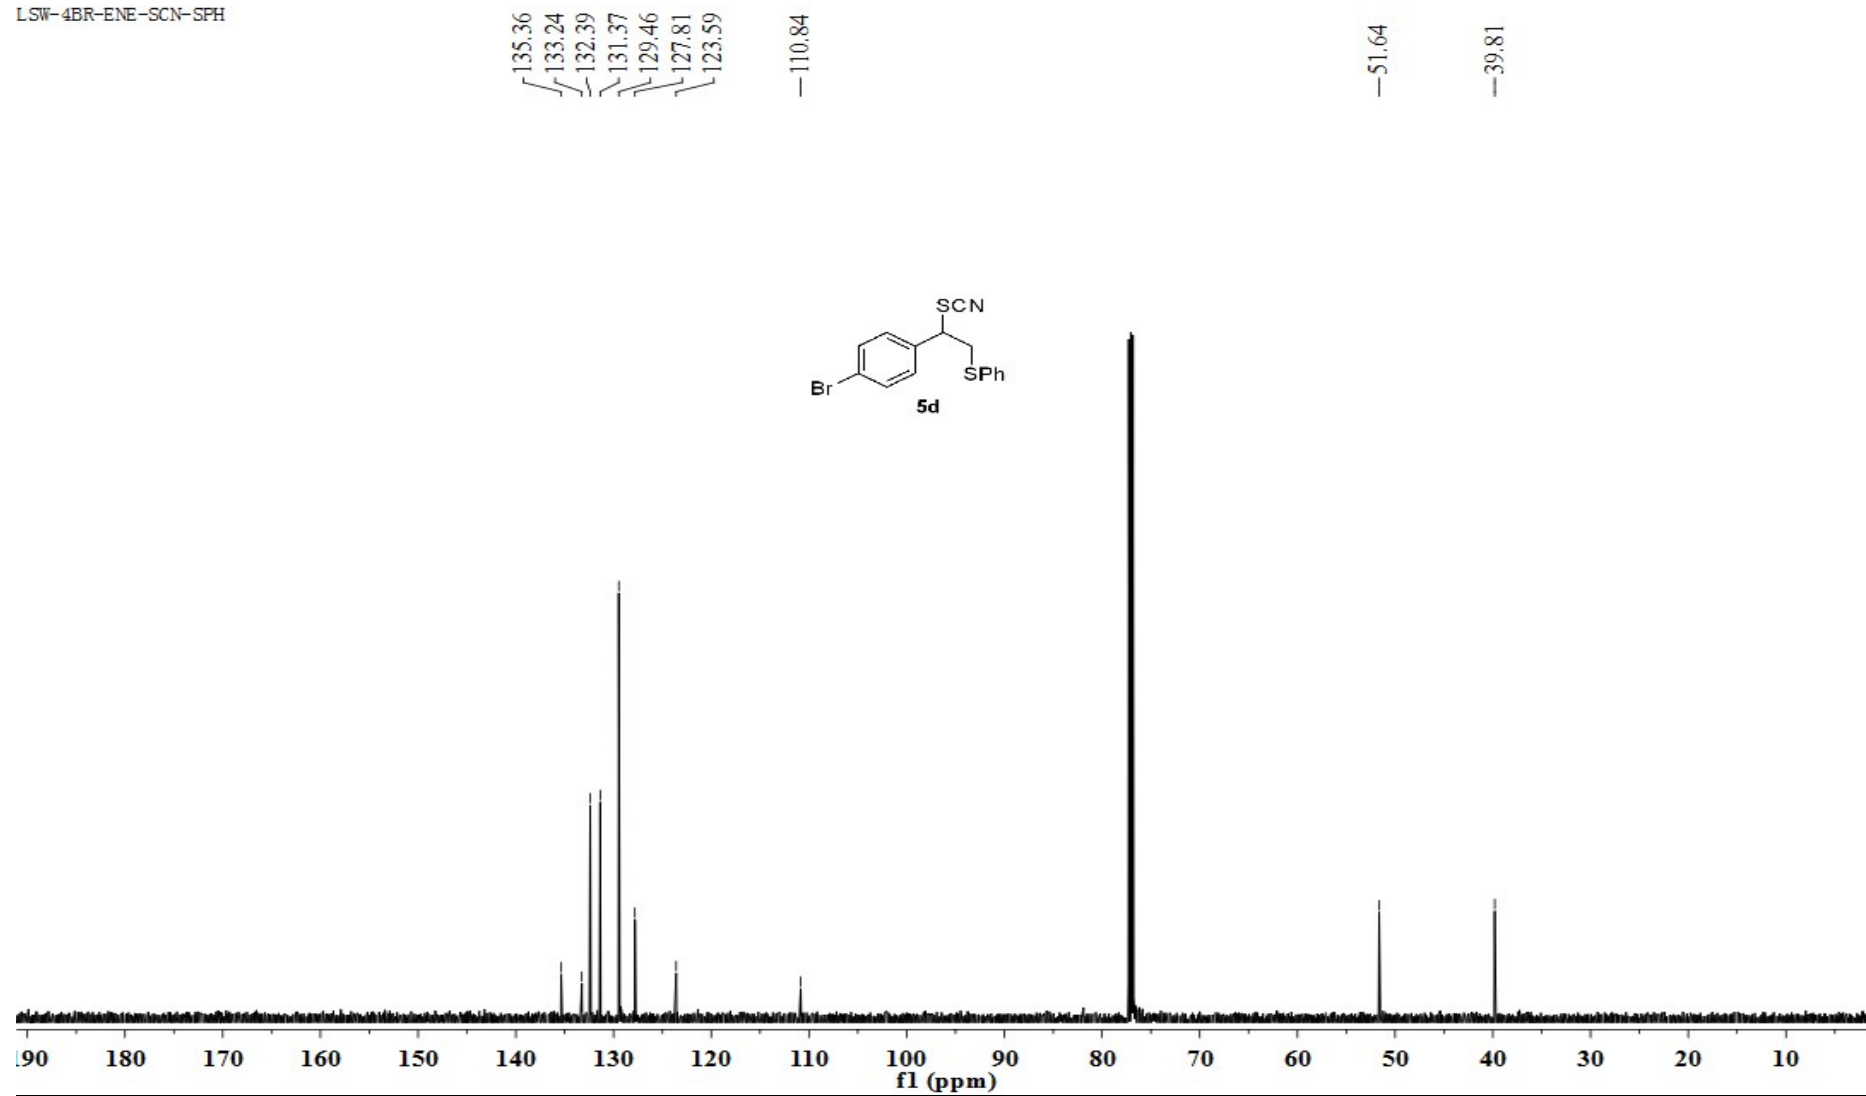

96. <sup>1</sup>H NMR of **5e** (600 MHz, CDCl<sub>3</sub>)

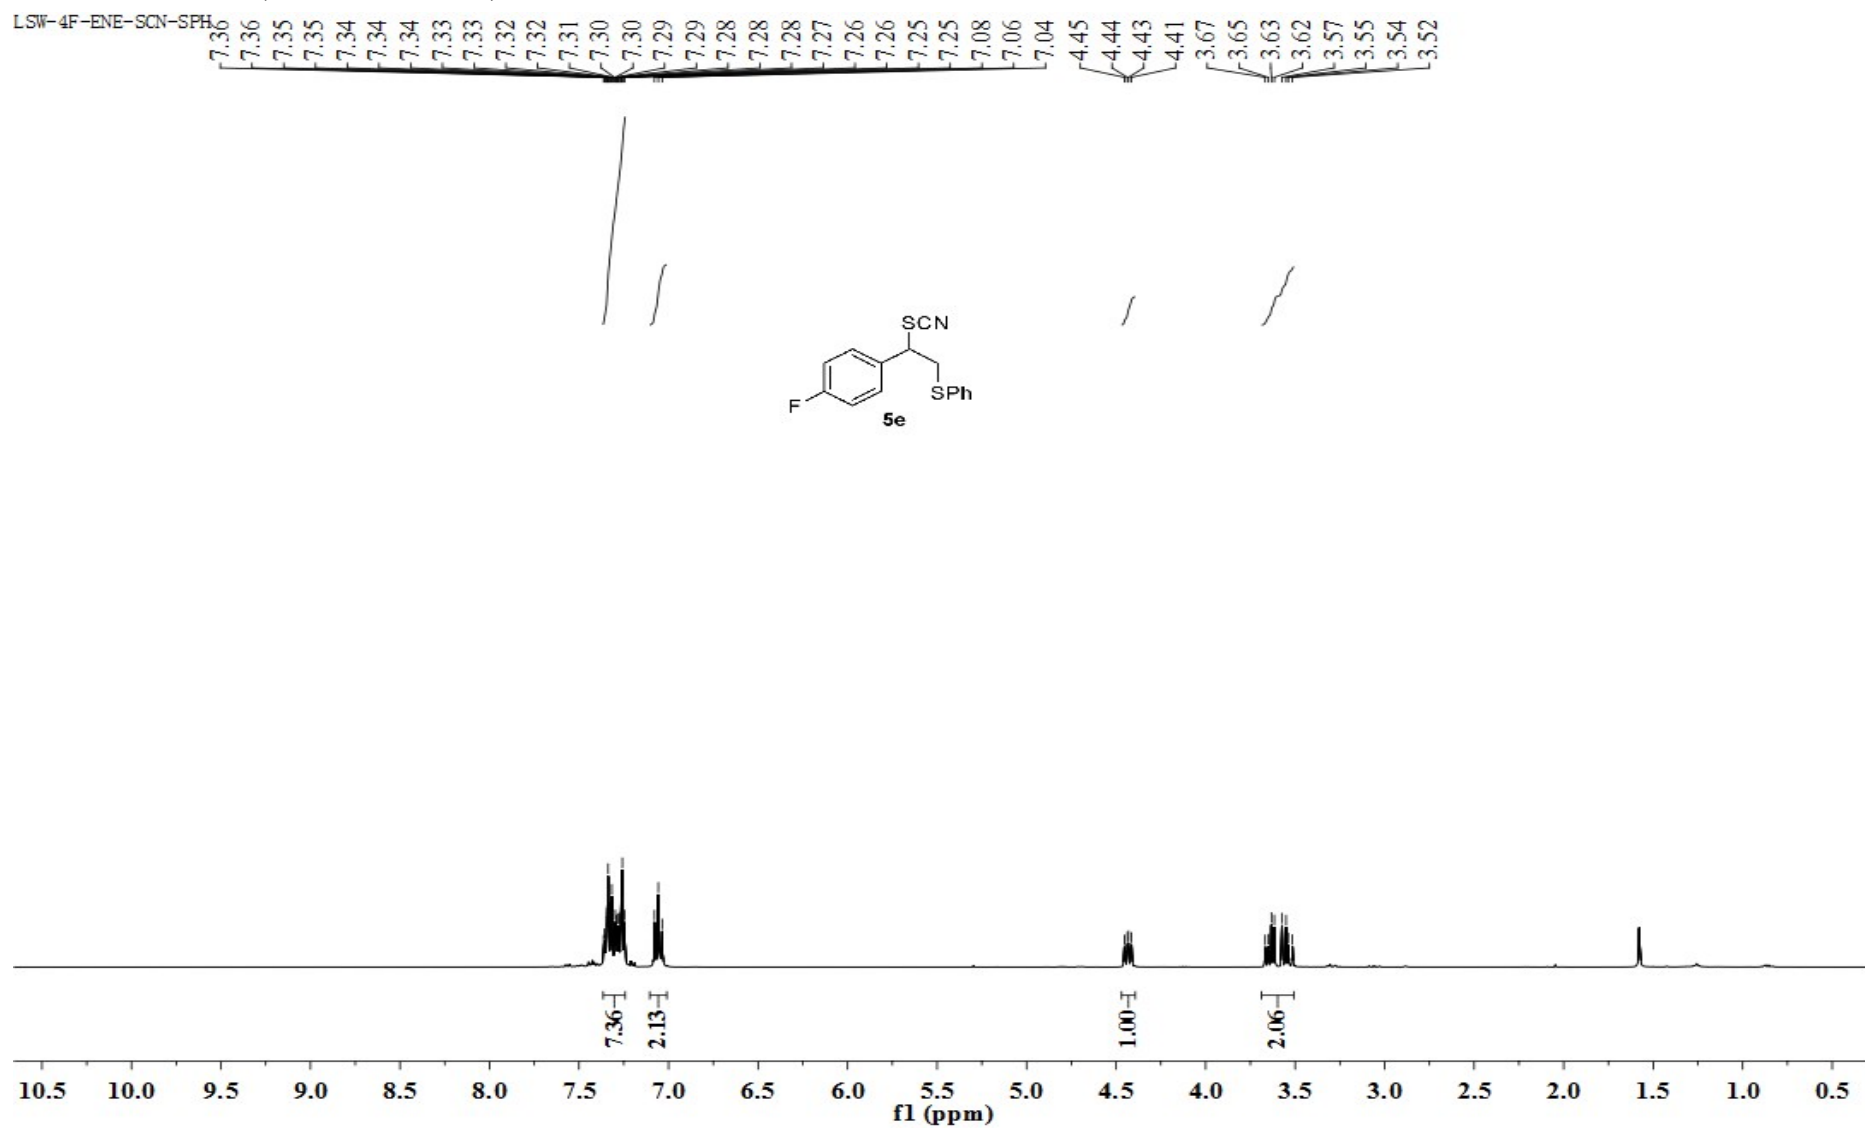

LSW-4F-ENE-SCN-SPH

-111.19

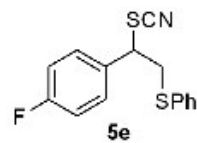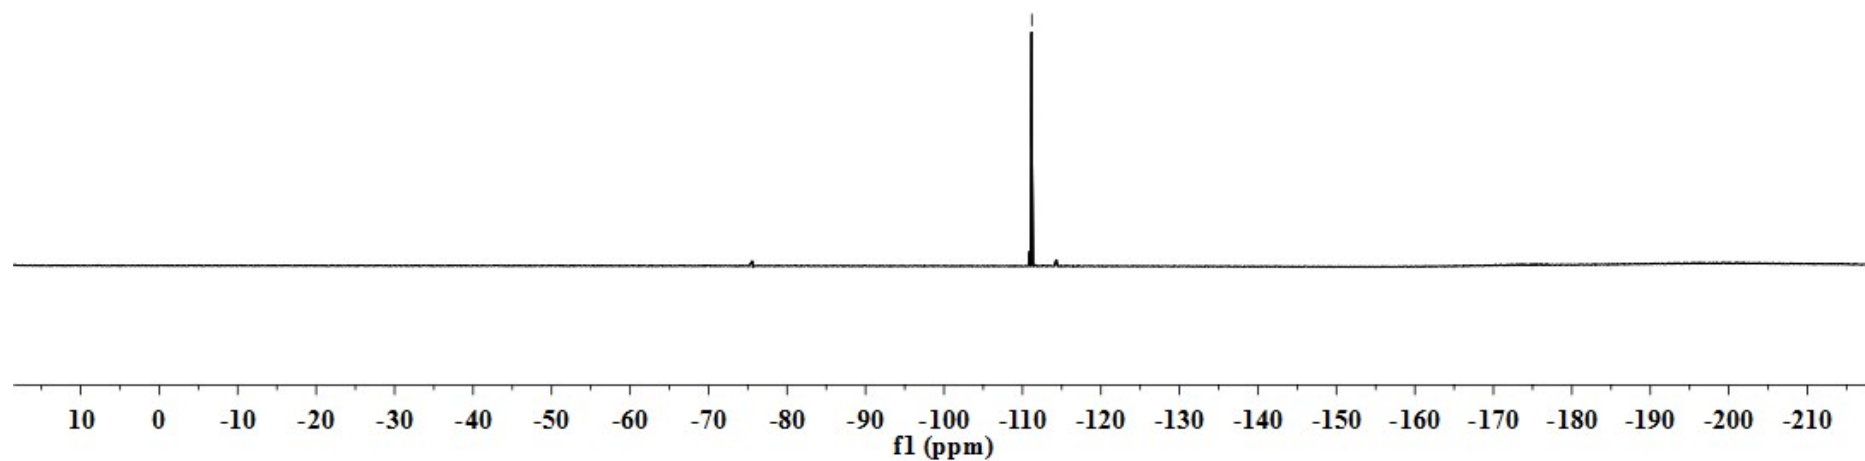



97. <sup>13</sup>C NMR of **5e** (125 MHz, CDCl<sub>3</sub>)

LSW-4F-ENE-SCN-SPH

164.29  
161.81

133.37  
132.18  
132.14  
131.30  
129.77  
129.69  
129.44  
127.76  
116.39  
116.17  
111.01

51.64

40.05

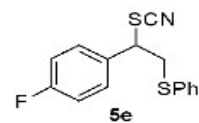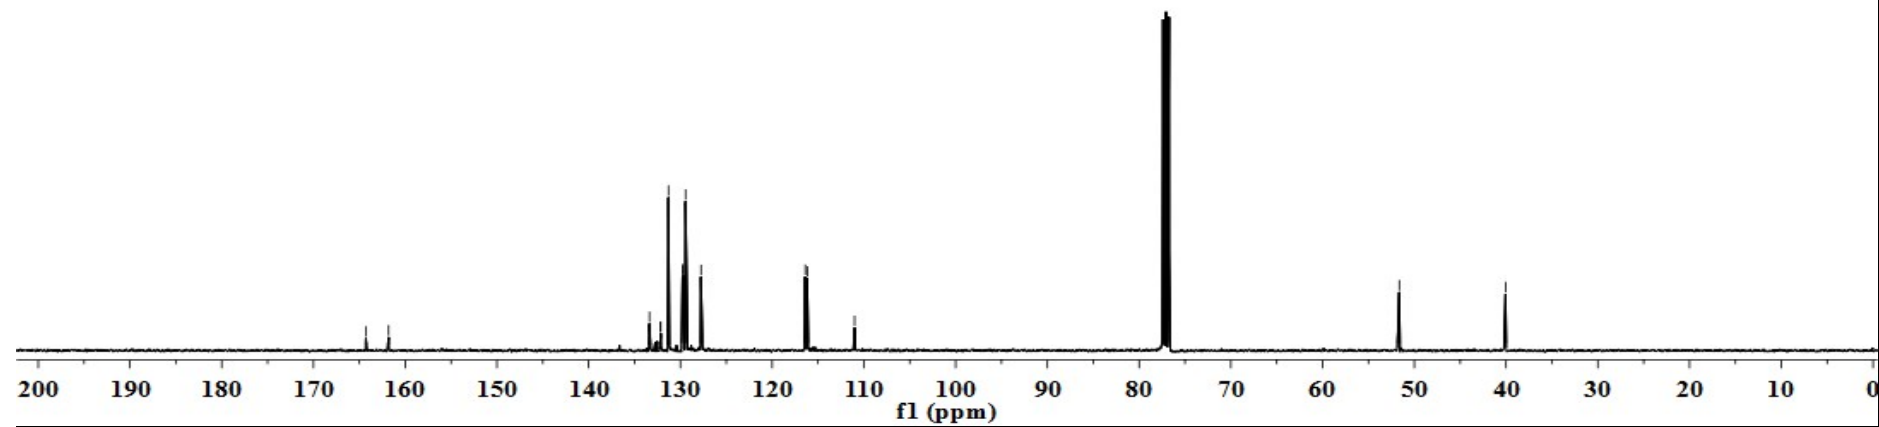

98. <sup>1</sup>H NMR of **5f** (600 MHz, CDCl<sub>3</sub>)

LSW-4PH-ENE-SCN-SPh

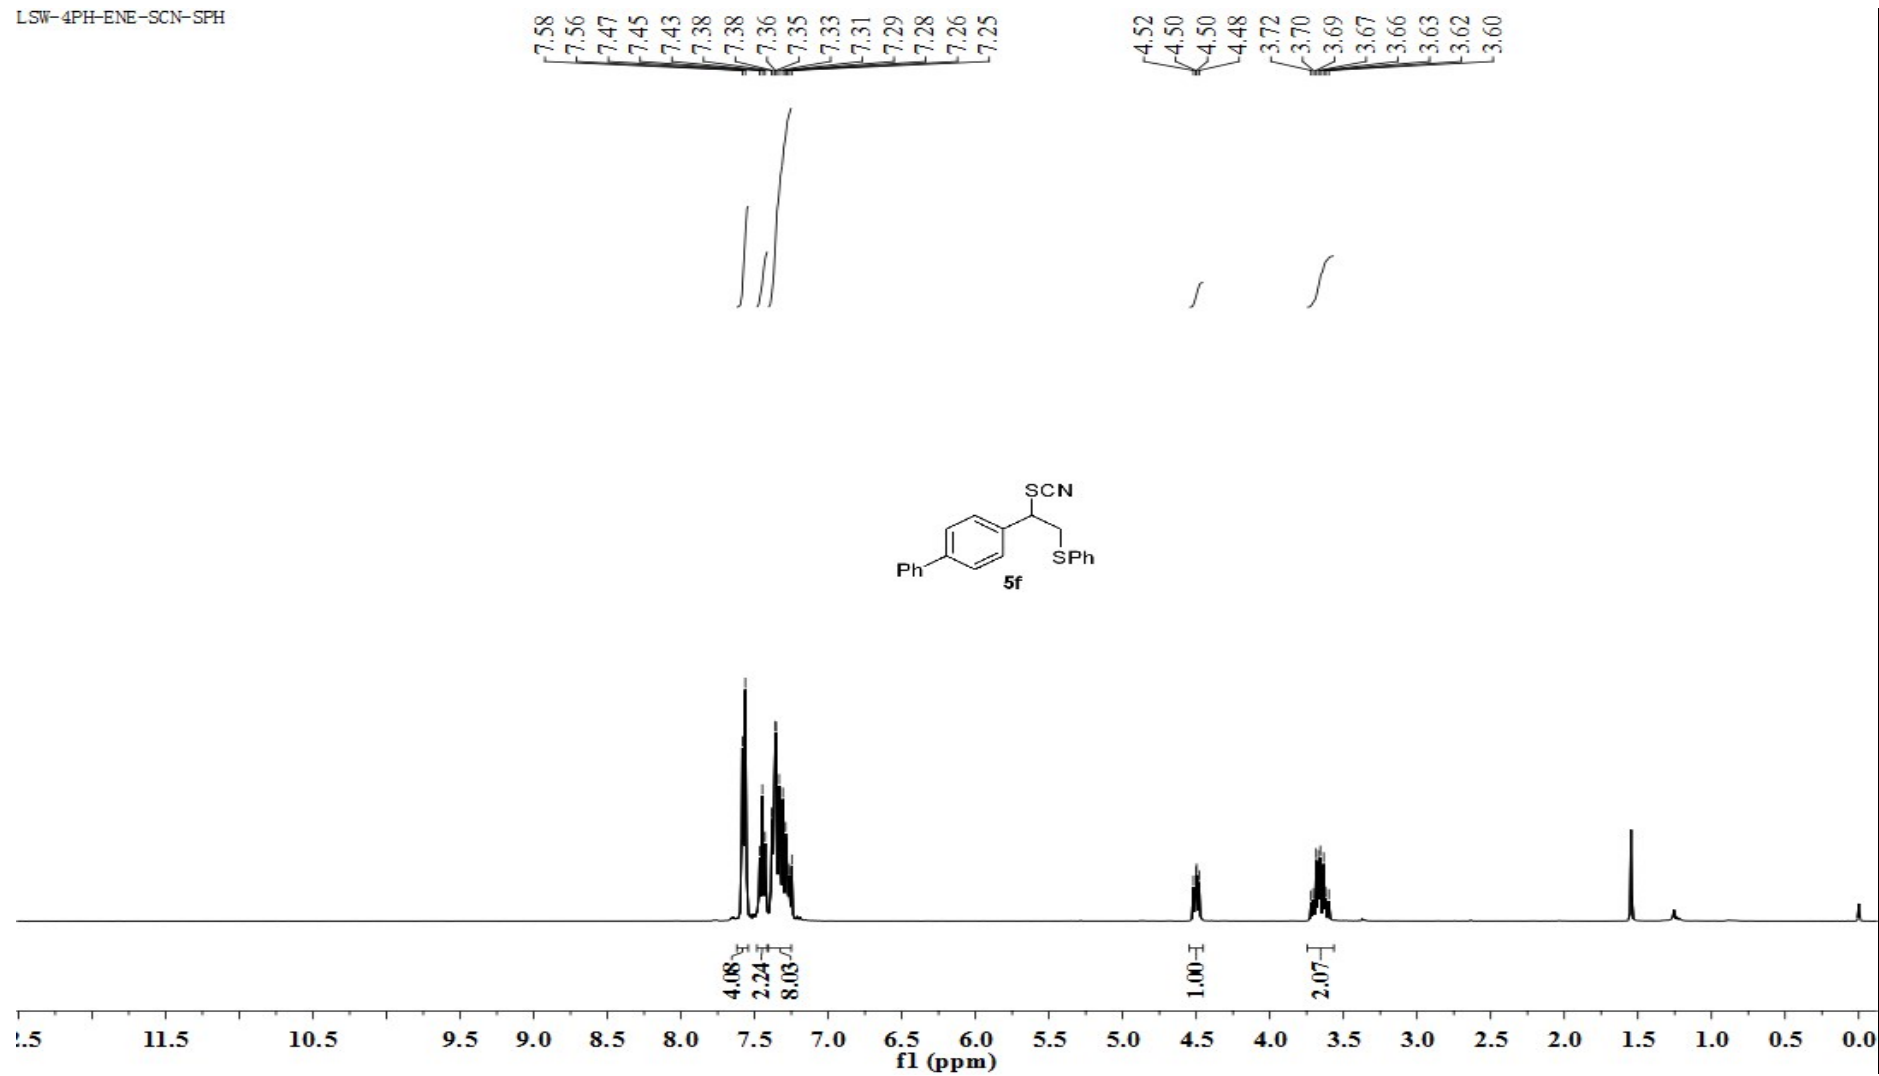

99. <sup>13</sup>C NMR of **5f** (125 MHz, CDCl<sub>3</sub>)

LSW-4PH-ENE-SCN-SFH-2

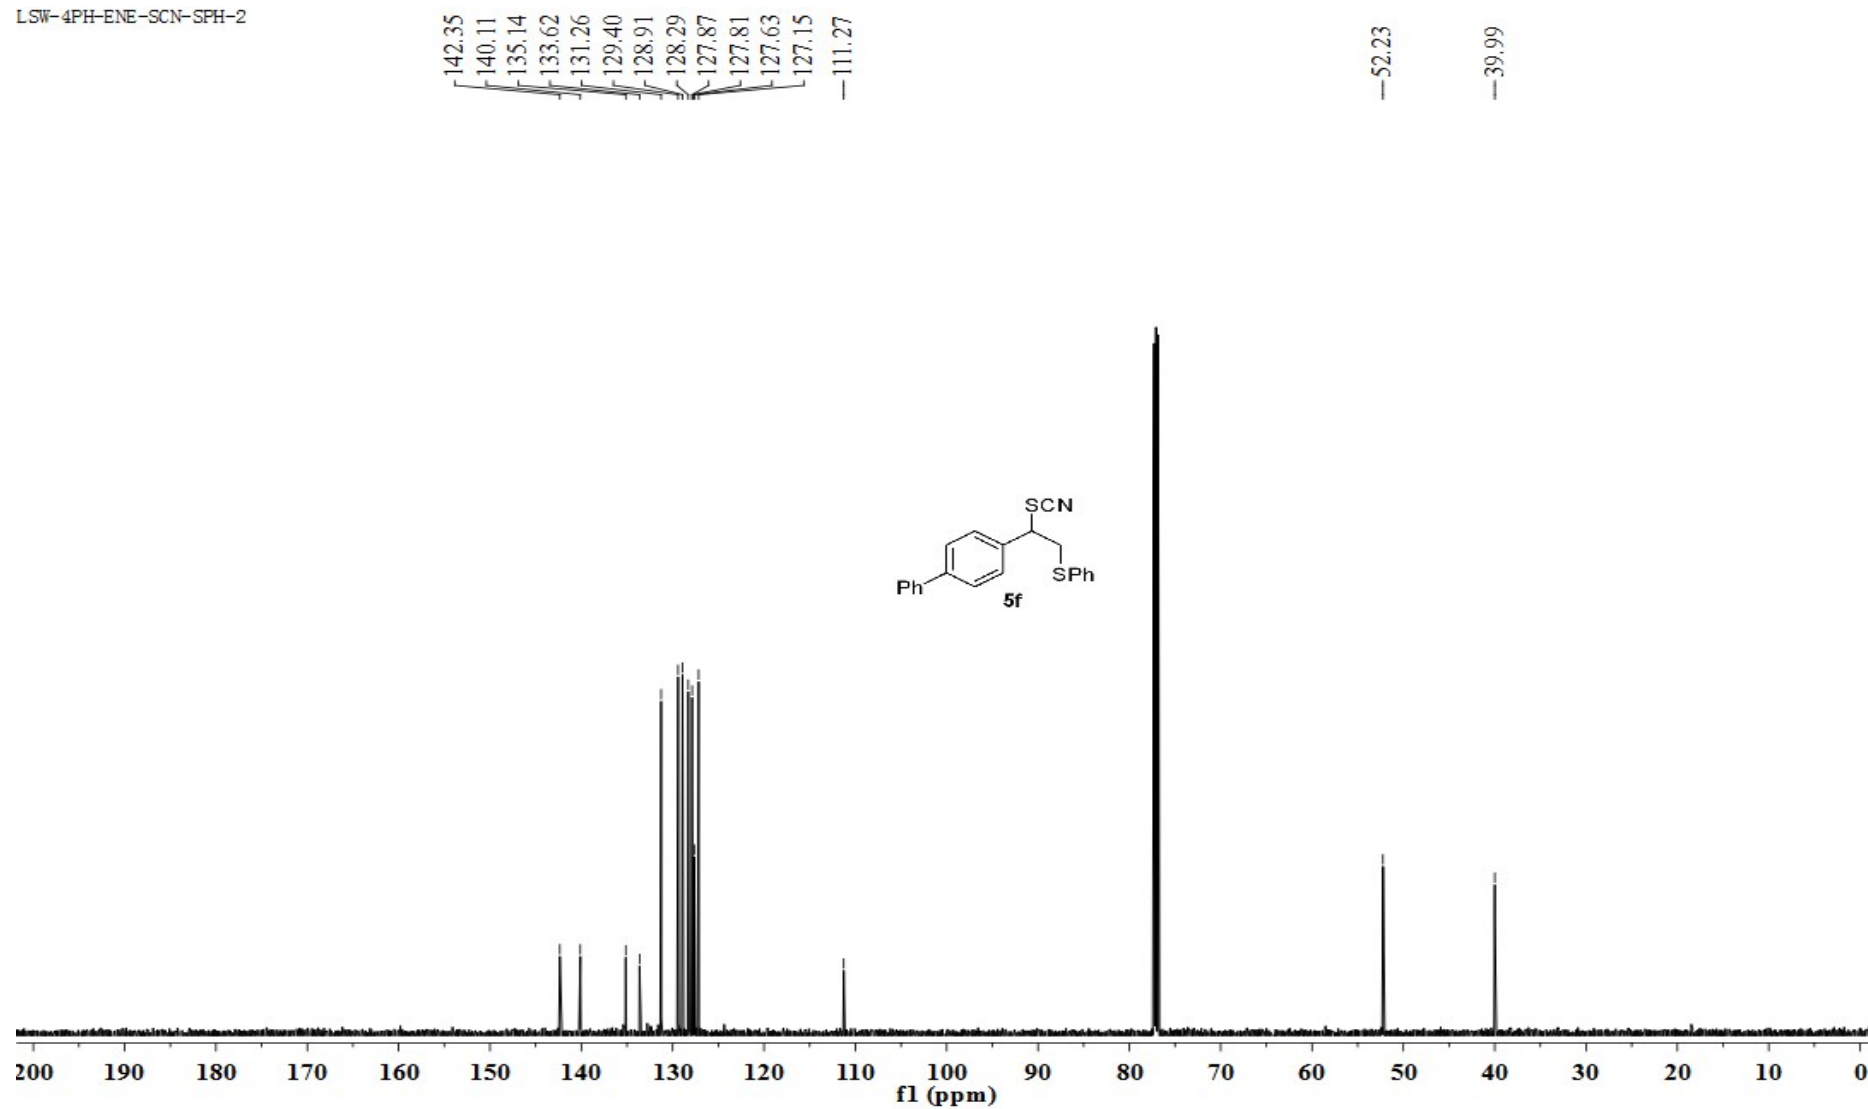

100. <sup>1</sup>H NMR of **5g** (600 MHz, CDCl<sub>3</sub>)

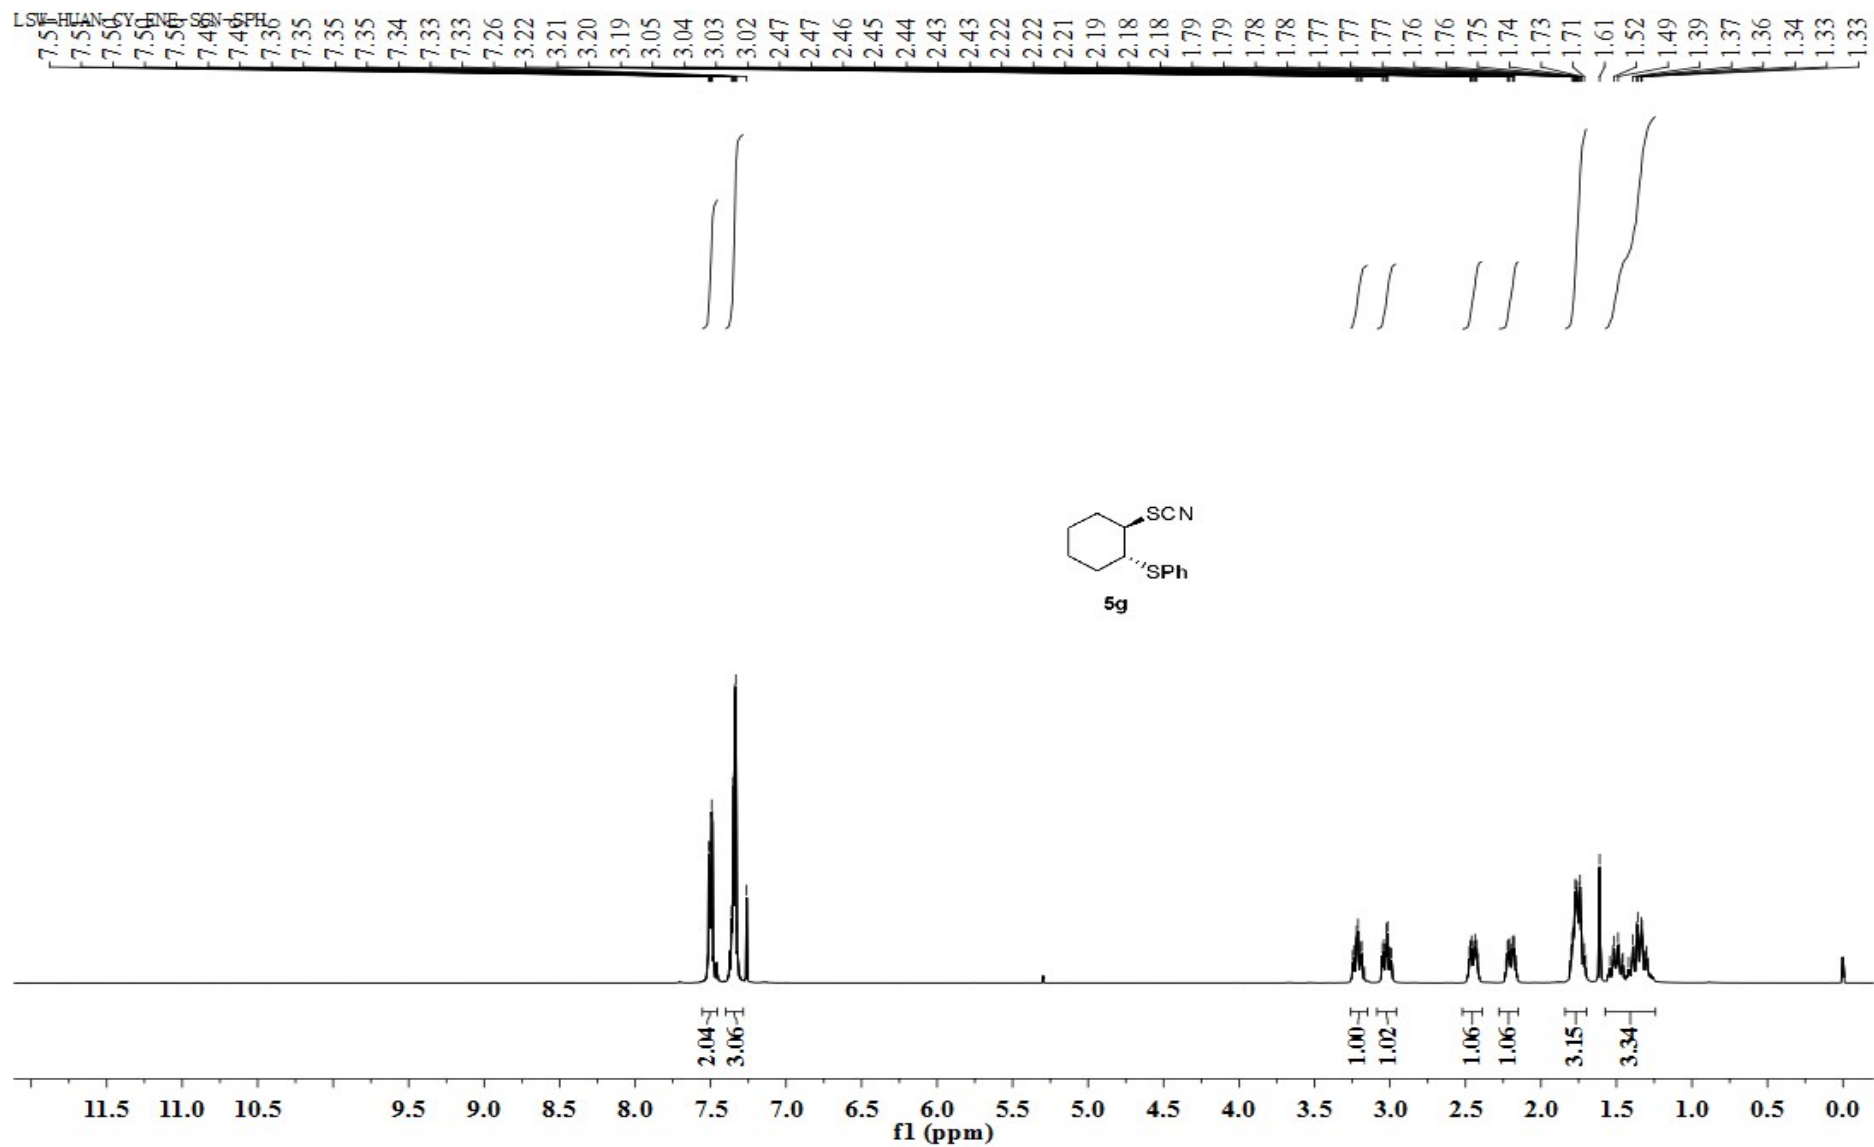

101.  $^{13}\text{C}$  NMR of **5g** (125 MHz,  $\text{CDCl}_3$ )

LSW-HUAN-CY-SCN-SPH

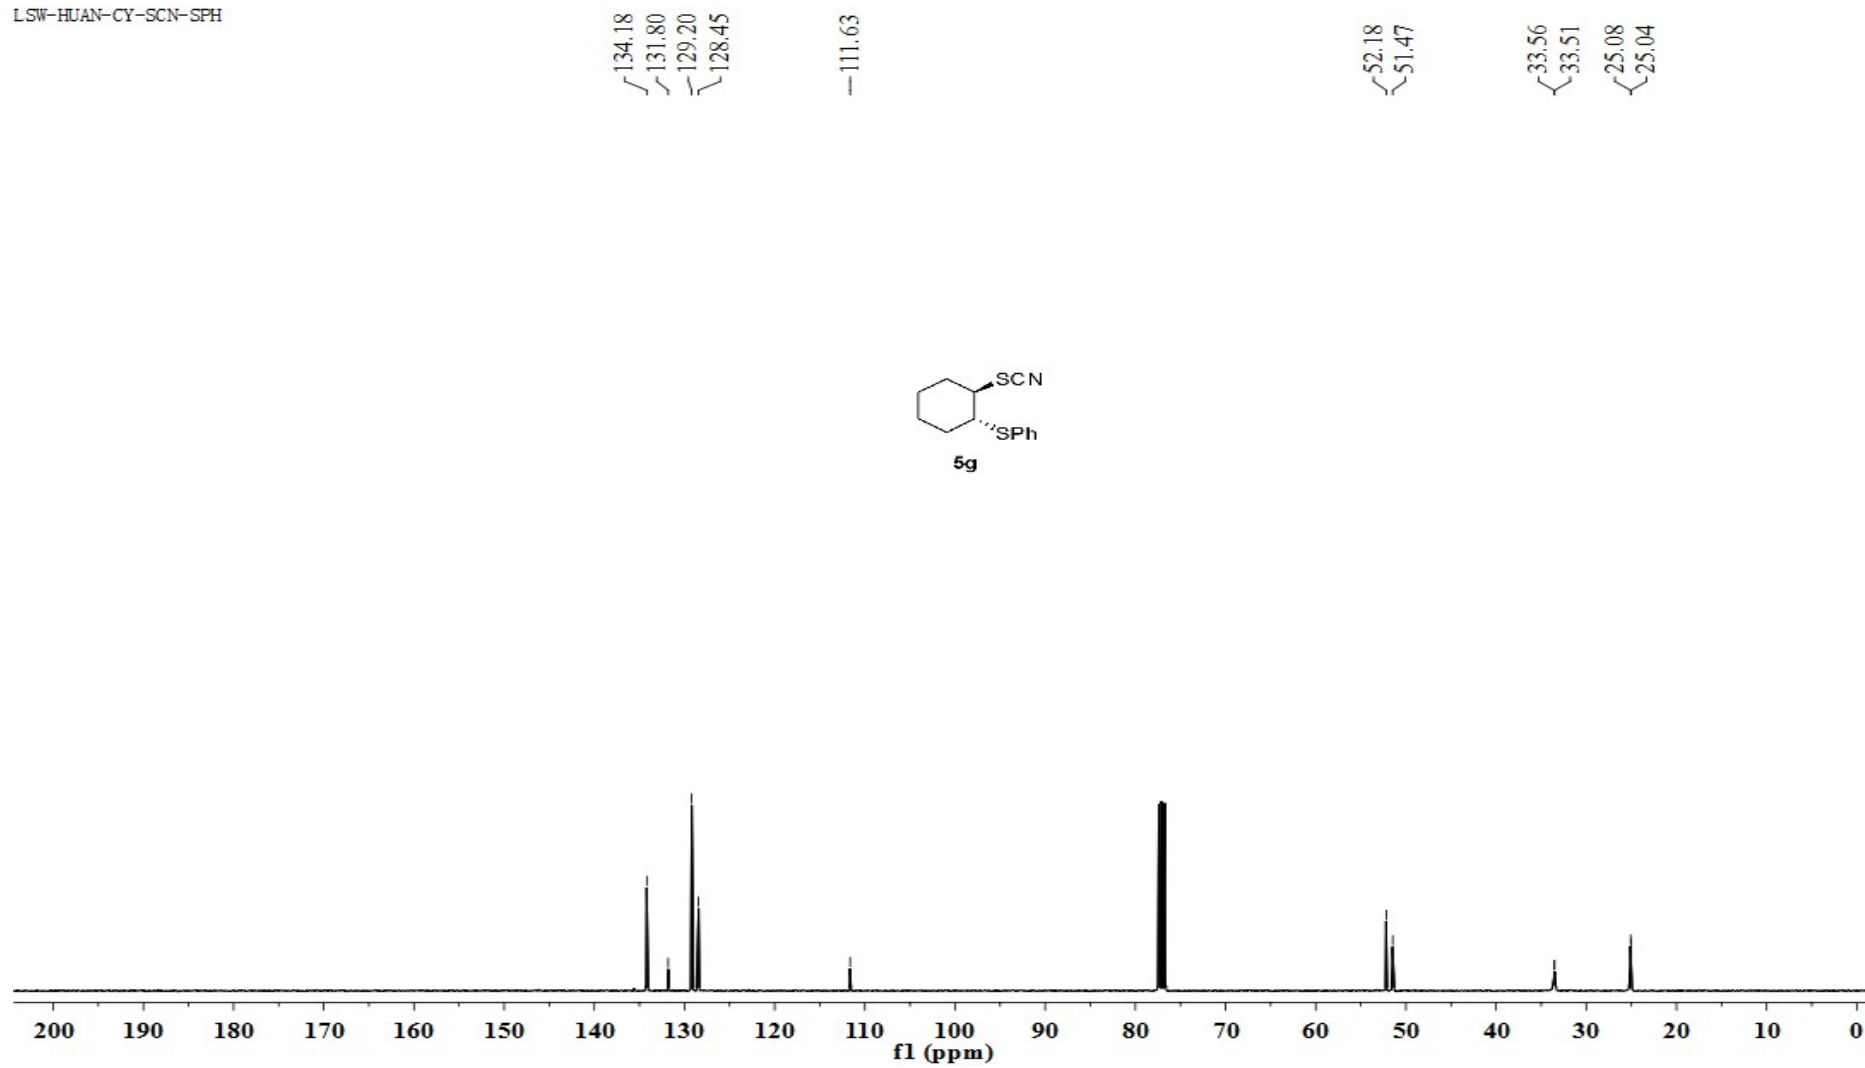

102. <sup>1</sup>H NMR of **5h** (600 MHz, CDCl<sub>3</sub>)

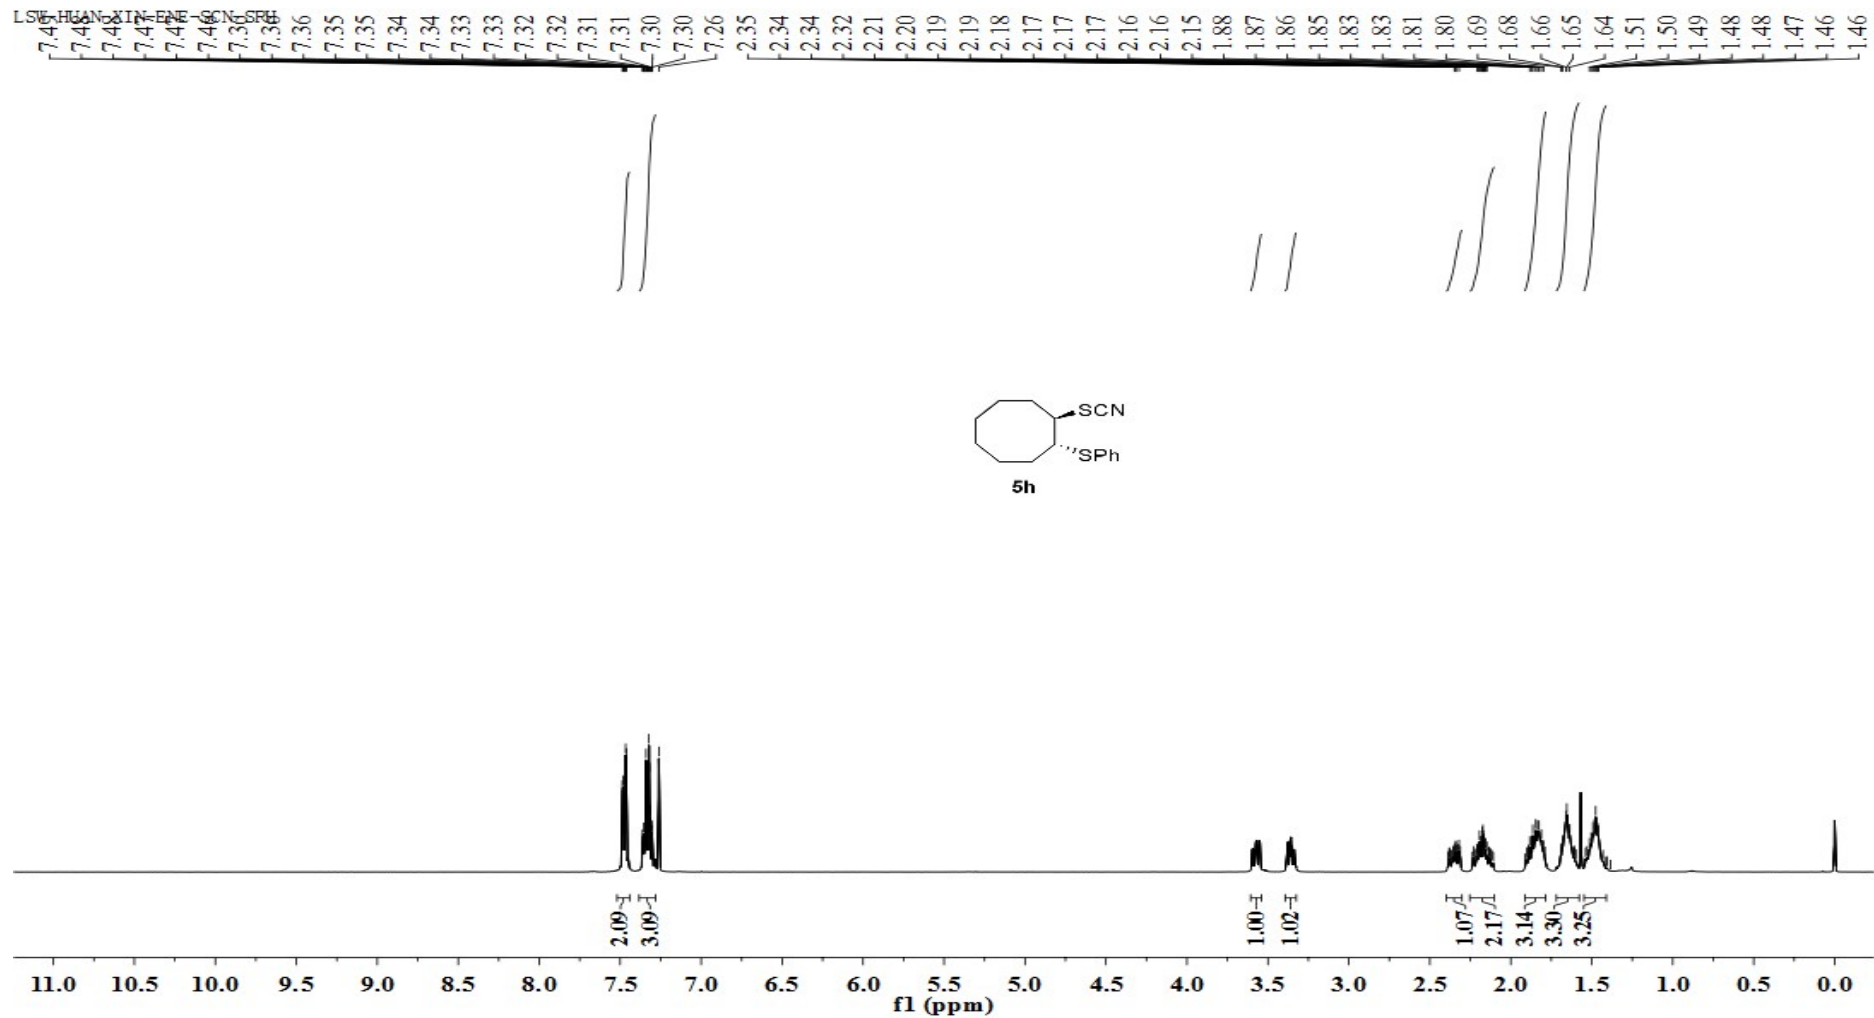

103.  $^{13}\text{C}$  NMR of **5h** (125 MHz,  $\text{CDCl}_3$ )

lsw-cir-xin-scn-sph

133.32  
133.11  
129.25  
128.07

112.49

55.13  
53.31

31.52  
31.28  
25.96  
25.92  
25.64  
25.28

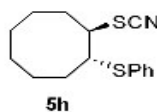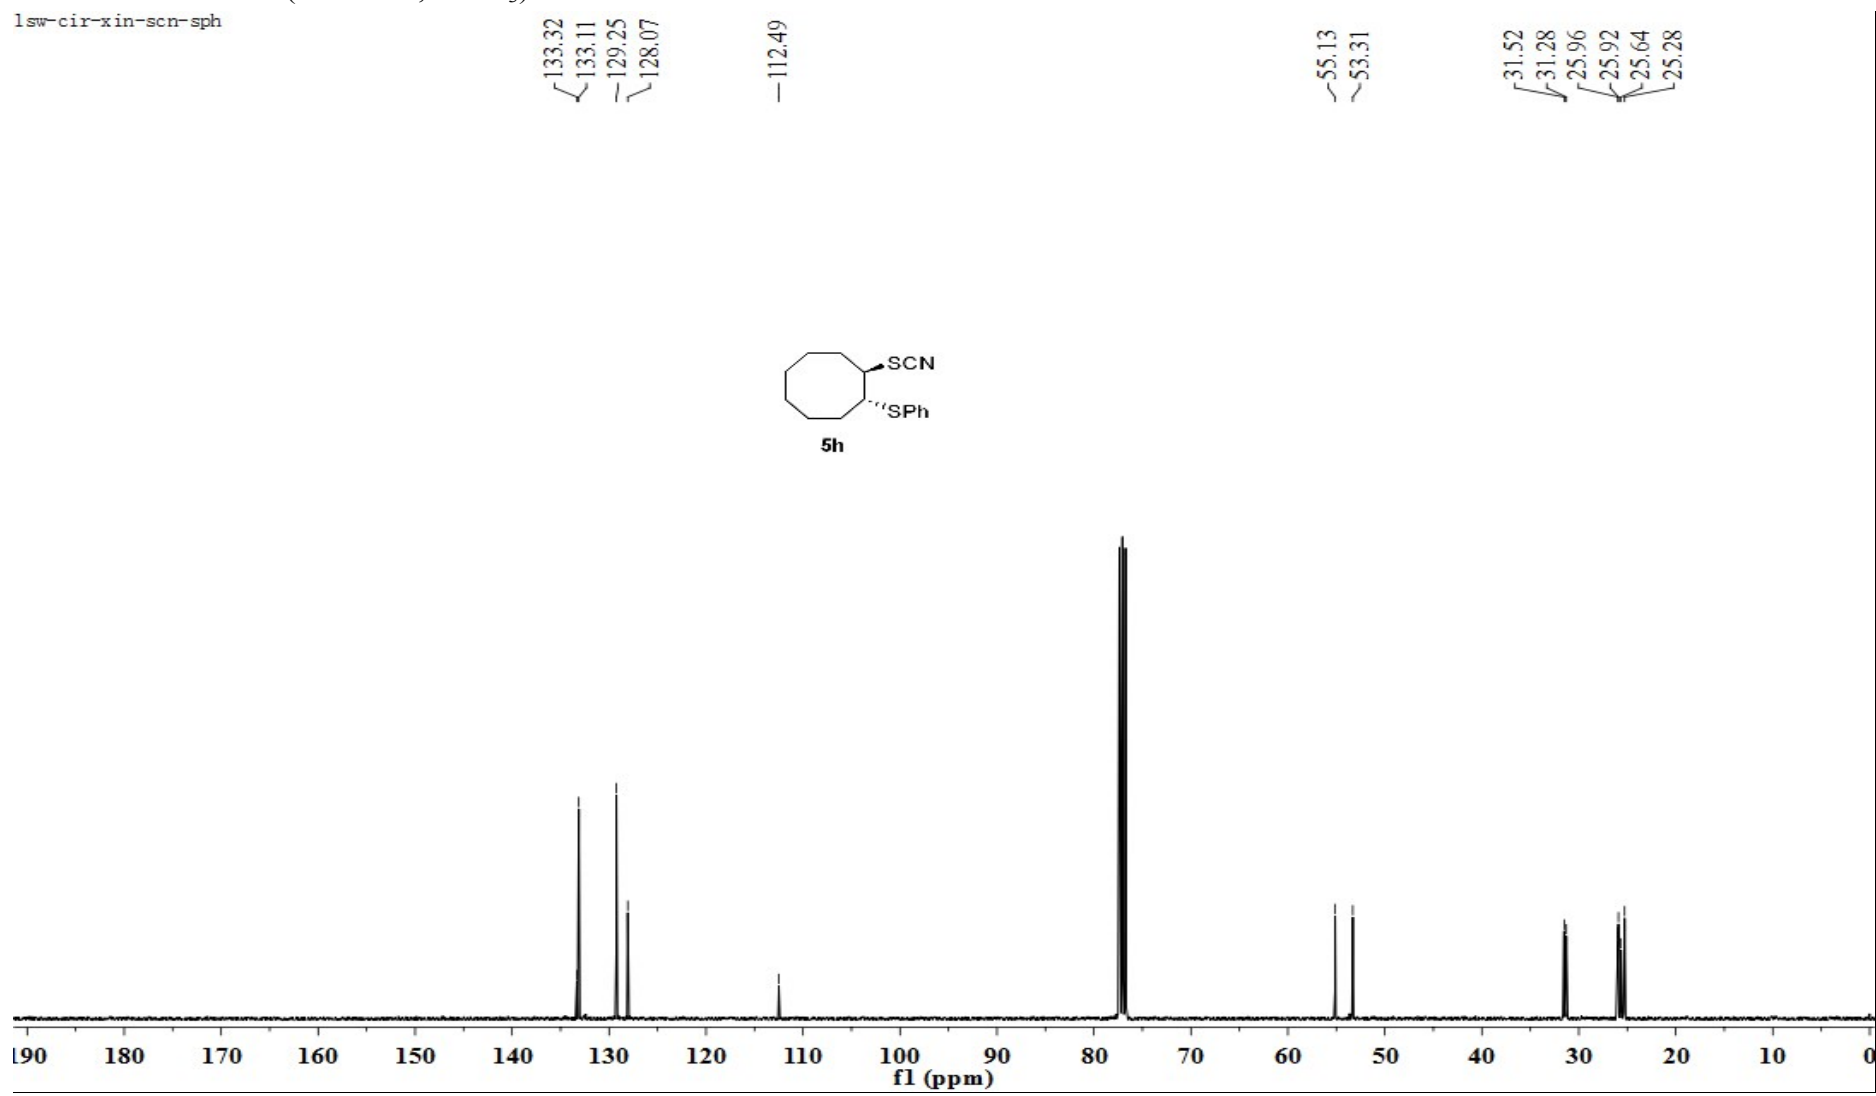

## 9. References

- [1] C. J. Nalbandian, E. M. Miller, S. T. Toenjes, J. L. Gustafson, *Chemical Communications* **2017**, *53*, 1494-1497.
